# Supplementary material for: Negative regulation of autophagy by UBA6-BIRC6–mediated ubiquitination of LC3
Source: eLife journal article supplement (doi:10.7554/elife.50034), 2019-11-06

Figure 8-figure supplement 1

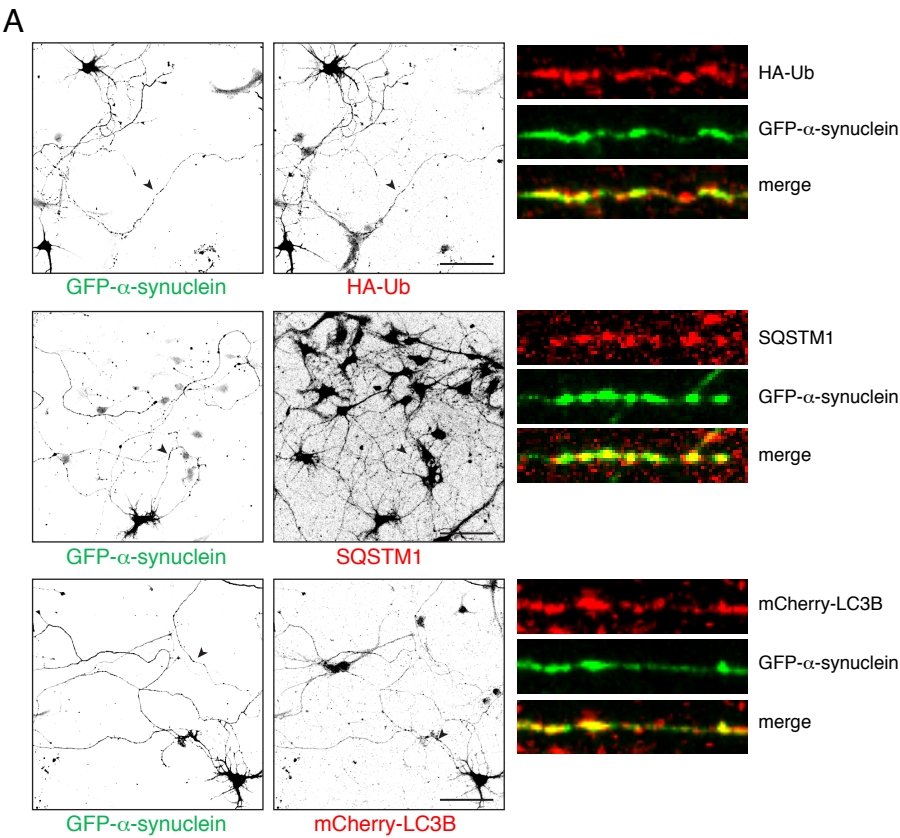

**B**

|             |     |     |     |     |     |     |   |  |
|-------------|-----|-----|-----|-----|-----|-----|---|--|
|             |     | W   | Y   | D   | Y   | W   | G |  |
| Rat Birc6   | TGG | TAT | GAC | TAC | TGG | GGT | G |  |
| Human BIRC6 | TGG | TAT | GAT | TAT | TGG | GGT | G |  |
|             | *** | *** | **  | **  | *** | *** | * |  |

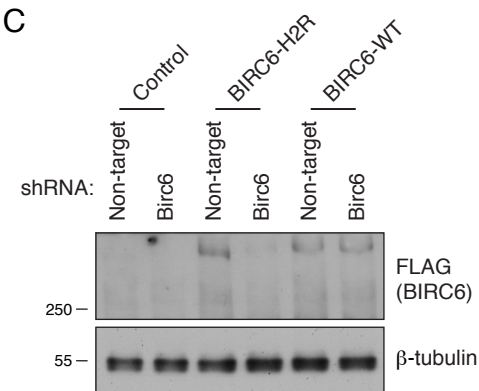

Supplement: supp [file elife_poa_e50034_Figure_8_figure_supplement_1.pdf › elife_poa_e50034_Figure_8_figure_supplement_1.pdf]
