# Supplementary material for: Negative regulation of autophagy by UBA6-BIRC6–mediated ubiquitination of LC3
Source: eLife. 2019 Nov 6;8:e50034. doi: 10.7554/eLife.50034 (PMC6863627; doi:10.7554/eLife.50034)
Supplement: Supplementary file 2. [file elife-50034-supp2.xlsx]

## Sheet: sample1.gene_summary
Supplementary file 2. MAGeCK of results from the primary genome-wide screen
id	num	pos|score	pos|p-value	pos|fdr	pos|rank	pos|goodsgrna	pos|lfc
ATG7	6	2.53e-13	2.4e-07	0.000354	1	5	6.5736
ATG12	6	2.64e-13	2.4e-07	0.000354	2	4	8.35
ATG13	6	3.56e-13	2.4e-07	0.000354	3	5	7.0499
MAP1LC3B	6	4.12e-13	2.4e-07	0.000354	4	5	4.8038
ATG16L1	6	9.46e-12	2.4e-07	0.000354	5	4	7.3622
ATG3	6	3.57e-11	2.4e-07	0.000354	6	4	6.231
RB1CC1	6	1.87e-10	2.4e-07	0.000354	7	4	5.0222
ATG4B	6	3.23e-10	2.4e-07	0.000354	8	4	6.251
VPS16	6	1.21e-09	2.4e-07	0.000354	9	4	3.4966
C12orf44	6	1.22e-09	2.4e-07	0.000354	10	4	3.7984
ATG10	6	1.42e-09	2.4e-07	0.000354	11	3	2.3562
ULK1	6	2.36e-09	2.4e-07	0.000354	12	4	3.516
ATG14	6	2.91e-08	2.4e-07	0.000354	13	3	3.886
WIPI2	6	8.87e-08	2.4e-07	0.000354	14	3	2.8025
ATG5	6	2.89e-07	7.19e-07	0.000928	15	3	1.2448
BIRC6	6	3.2e-07	7.19e-07	0.000928	16	3	0.61361
VPS33A	6	5.28e-07	1.68e-06	0.002038	17	3	-0.199
ATG9A	6	9.81e-07	3.11e-06	0.003575	18	3	2.1579
MAP1LC3B2	6	1.65e-05	3.19e-05	0.032921	19	2	-1.8024
CGB7	1	2.09e-05	1.89e-05	0.020584	20	1	8.1752
hsa-mir-4516	4	5.02e-05	8.74e-05	0.086044	21	1	-1.5752
ASB12	6	5.13e-05	9.94e-05	0.093384	22	2	-2.7369
AK2	6	6.1e-05	0.00011619	0.104391	23	2	-3.2597
ZNF93	5	8.56e-05	0.00015596	0.134282	24	2	-3.1742
B4GALT3	6	0.00017578	0.00035768	0.291195	25	1	-2.8482
ACOT13	6	0.00018412	0.0003802	0.291195	26	2	-1.2484
SPATA2L	6	0.0001885	0.00038787	0.291195	27	2	-1.4621
UBA6	6	0.00019383	0.00039457	0.291195	28	2	-3.3265
MIF	6	0.00022599	0.00042668	0.297525	29	1	-1.9215
IGFALS	6	0.00027621	0.00047699	0.31795	30	1	-1.6951
TTYH3	6	0.00032642	0.00052346	0.338026	31	1	-2.0741
hsa-mir-197	4	0.00035153	0.00043195	0.297525	32	1	-1.8536
ATF7IP	6	0.00047705	0.00067104	0.420192	33	1	-4.092
CCK	6	0.00057746	0.00077214	0.469278	34	1	-3.0814
F2RL1	6	0.00062766	0.00081813	0.483027	35	1	-2.7072
RSBN1	6	0.00072805	0.00090821	0.511239	36	1	-2.6333
ZNF860	6	0.00082844	0.001017	0.553022	37	1	-3.0399
hsa-mir-1304	4	0.00085356	0.0009154	0.511239	38	1	-1.8709
CRTC1	6	0.00087863	0.001075	0.569561	39	1	-2.4329
EXO5	6	0.00092881	0.001119	0.578094	40	1	-3.151
SEZ6L2	6	0.000979	0.0011626	0.58597	41	1	-3.9494
PNLIPRP2	6	0.0010292	0.0012096	0.59512	42	1	-2.8917
MPL	6	0.0010794	0.0012594	0.605227	43	1	-3.224
LOC100507003	6	0.0011295	0.001304	0.612399	44	1	-3.0685
LIPJ	6	0.0011797	0.0013461	0.618152	45	1	-3.6101
TRIM71	6	0.0013302	0.0014976	0.658416	46	1	-2.54
hsa-mir-1268b	4	0.0013889	0.0014343	0.644318	47	1	-0.83461
PDS5B	6	0.0014306	0.0015934	0.677612	48	1	-1.948
C3orf27	6	0.0015309	0.001693	0.685983	49	1	-2.5262
hsa-mir-8052	4	0.0015561	0.0016068	0.677612	50	1	-3.3733
CDK5	6	0.0015811	0.0017448	0.693355	51	1	-2.6241
hsa-mir-8078	4	0.0015895	0.0016399	0.677723	52	1	-1.3095
MEF2BNB	6	0.0016814	0.0018497	0.721184	53	1	-1.9215
ATP5J	6	0.0017315	0.0018952	0.725248	54	1	-2.0152
STAU1	6	0.0017817	0.0019384	0.728263	55	1	-2.7531
EIF2D	6	0.001882	0.0020395	0.739361	56	1	-2.2477
LYPLA2	6	0.0019321	0.002096	0.746757	57	1	-3.3265
hsa-mir-7159	4	0.0019574	0.0020002	0.738066	58	1	-2.2317
BRE	6	0.0019823	0.0021458	0.751552	59	1	-3.0685
ENTPD2	6	0.0021327	0.0022877	0.787871	60	1	-3.2525
GLYAT	6	0.002233	0.002394	0.810988	61	1	-3.1699
EFCAB6	6	0.0022831	0.0024477	0.815794	62	1	-2.9352
KRT72	6	0.0024335	0.0025943	0.850935	63	1	-3.3537
RBM34	6	0.0025337	0.0026925	0.869353	64	1	-3.3414
QRICH2	6	0.0025838	0.0027395	0.870906	65	1	-3.1225
SYPL2	6	0.0027342	0.0029029	0.908748	66	1	-3.0766
OVOL3	6	0.0027843	0.0029465	0.908748	67	1	-3.3385
RPS6	6	0.0028845	0.0030414	0.924214	68	1	-2.9029
TSPAN31	6	0.0029847	0.0031362	0.939231	69	1	-2.4747
PIGC	6	0.003135	0.003291	0.967287	70	1	-2.2806
RPL26L1	6	0.0031851	0.0033327	0.967287	71	1	-3.6232
SEPT10	6	0.0032352	0.0033768	0.967287	72	1	-2.8917
PGAM2	6	0.0032853	0.0034189	0.967287	73	1	-3.525
OR3A3	6	0.0033354	0.003464	0.967287	74	1	-2.8091
C7orf25	6	0.0034355	0.0035684	0.983168	75	1	-2.9752
ERCC6L	6	0.0034856	0.0036202	0.983991	76	1	-2.9125
C14orf79	6	0.0035357	0.0036666	0.983991	77	1	-2.6435
TRIM42	6	0.0035858	0.0037189	0.984647	78	1	-4.1901
CNOT6L	6	0.0036358	0.0037644	0.984647	79	1	-3.107
IGDCC3	6	0.0036859	0.0038133	0.984963	80	1	-2.1055
NR1I3	6	0.003736	0.0038631	0.985515	81	1	-3.5599
LIPE	6	0.0039362	0.0040753	1	82	1	-2.533
CASC4	6	0.0039863	0.0041271	1	83	1	-3.7886
ZNF710	6	0.0041365	0.0042684	1	84	1	-2.3258
hsa-mir-660	4	0.0041622	0.0041669	1	85	1	-3.1766
HBB	6	0.0041865	0.0043173	1	86	1	-3.1195
HMGXB3	6	0.0042366	0.0043681	1	87	1	-2.533
SNCG	6	0.0043367	0.0044716	1	88	1	-2.5262
TMEM225	6	0.0043867	0.0045176	1	89	1	-2.4044
OR1E2	6	0.0044367	0.0045665	1	90	1	-2.4064
SWAP70	6	0.0044868	0.0046158	1	91	1	-2.54
PTPDC1	6	0.0045869	0.0047131	1	92	1	-2.4003
KCTD12	6	0.0046369	0.004761	1	93	1	-2.3258
PEF1	6	0.0046869	0.0048156	1	94	1	-2.6087
STRA8	6	0.0047369	0.0048712	1	95	1	-3.4629
RCBTB2	6	0.004887	0.0050145	1	96	1	-3.0118
SOCS5	6	0.0050371	0.0051496	1	97	1	-2.4811
SCCPDH	6	0.0051371	0.0052444	1	98	1	-3.3024
hsa-mir-1293	4	0.0051632	0.0051606	1	99	1	-2.1366
CCZ1B	2	0.0051916	0.0052368	1	100	1	1.7462
SLCO2B1	6	0.0052371	0.0053508	1	101	1	-2.533
HNRNPM	6	0.0052871	0.005404	1	102	1	-1.9215
hsa-mir-6131	4	0.0052966	0.0053072	1	103	1	-2.4674
KRT16	6	0.0053871	0.0055017	1	104	1	-2.4329
hsa-mir-331	4	0.0053967	0.0054021	1	105	1	-2.4981
CHST8	6	0.0054371	0.0055535	1	106	1	-3.5643
PITPNM1	6	0.0054871	0.0056043	1	107	1	-3.4104
PSMB11	6	0.0055371	0.0056565	1	108	1	-3.3414
EFHB	6	0.0055871	0.0057145	1	109	1	-1.9506
SLMAP	6	0.0056371	0.0057638	1	110	1	-3.0329
GLB1L	6	0.0056871	0.0058098	1	111	1	-3.5576
GPR156	6	0.0057371	0.0058592	1	112	1	-2.3569
C10orf111	6	0.0057871	0.0059009	1	113	1	-2.8091
SSX2	6	0.005837	0.0059574	1	114	1	-2.5863
hsa-mir-187	4	0.0058635	0.005887	1	115	1	-3.5991
MVK	6	0.005887	0.0060144	1	116	1	-1.9807
NTN4	6	0.005937	0.0060556	1	117	1	-3.5118
GCGR	6	0.005987	0.0061112	1	118	1	-2.2002
PTRH1	6	0.0060869	0.0062046	1	119	1	-2.4829
NSMCE1	6	0.0061369	0.0062598	1	120	1	-3.9859
hsa-mir-941-2	2	0.0061766	0.00622	1	121	1	-0.37737
LRRC3B	6	0.0061869	0.0063043	1	122	1	-3.3414
VASH2	6	0.0063367	0.0064629	1	123	1	-3.7689
KDELC1	6	0.0064367	0.0065741	1	124	1	-3.7428
TLN1	6	0.0064866	0.0066186	1	125	1	-2.5896
NKX3-1	6	0.0065865	0.0067183	1	126	1	-3.0399
EMX1	6	0.0066864	0.0068136	1	127	1	-2.2027
TNFRSF10A	6	0.0067364	0.0068716	1	128	1	-3.9494
PTCD1	3	0.0068276	0.0069037	1	129	1	-1.7689
SNAPIN	6	0.0068362	0.0069674	1	130	1	-3.107
ASB7	6	0.0068862	0.0070168	1	131	1	-2.5262
OR51I1	6	0.0069361	0.0070695	1	132	1	-3.4571
APLF	6	0.006986	0.0071141	1	133	1	-3.0118
EFNA3	6	0.007036	0.007161	1	134	1	-2.1545
COX14	6	0.0070859	0.0072113	1	135	1	-2.054
hsa-mir-329-1	4	0.0070963	0.007104	1	136	1	-2.5566
RABGGTA	6	0.0071358	0.0072616	1	137	1	-1.9311
XCL2	3	0.0071526	0.007218	1	138	1	-3.5154
DNAJB8	6	0.0072357	0.0073608	1	139	1	-3.151
GJA1	6	0.0072856	0.0074126	1	140	1	-2.8004
SRPK1	6	0.0073854	0.0075194	1	141	1	-3.2525
C20orf197	6	0.0074853	0.0076196	1	142	1	-3.6532
CRIP3	6	0.0075352	0.0076766	1	143	1	-2.1341
CNTNAP5	6	0.0075851	0.0077322	1	144	1	-1.5752
STEAP1	6	0.0077847	0.0079449	1	145	1	-3.4571
SLC37A3	6	0.0078346	0.0079995	1	146	1	-2.9186
ATP5S	6	0.0078845	0.0080455	1	147	1	-4.0895
FAM217A	6	0.0079843	0.0081361	1	148	1	-2.0774
TRPM2	6	0.0080342	0.0081806	1	149	1	-3.8637
EXOC1	6	0.008134	0.0082726	1	150	1	-3.4062
DUPD1	6	0.0081838	0.0083167	1	151	1	-2.3245
IGFBP5	6	0.0082337	0.0083622	1	152	1	-3.5576
PRSS3	6	0.0082836	0.0084145	1	153	1	-3.2923
PYDC1	6	0.0083335	0.00846	1	154	1	-3.5118
CXXC1	6	0.0084332	0.0085625	1	155	1	-2.8832
hsa-mir-6824	4	0.0084611	0.008448	1	156	1	-1.7955
AMZ1	6	0.0084831	0.008619	1	157	1	-3.6532
LINGO2	6	0.008533	0.0086674	1	158	1	-3.4279
MICU3	6	0.0085828	0.0087177	1	159	1	-2.8091
MAGOH	6	0.0086327	0.0087733	1	160	1	-2.7261
RANBP6	6	0.0087324	0.0088677	1	161	1	-4.4999
BCL11A	6	0.0088321	0.0089616	1	162	1	-1.262
CIB1	6	0.008882	0.0090081	1	163	1	-1.8536
SEMA6B	6	0.0089318	0.0090608	1	164	1	-2.7422
GREM1	6	0.0089817	0.009114	1	165	1	-3.1742
GABBR2	6	0.0090814	0.0092232	1	166	1	-2.9504
SLC35A3	6	0.0091811	0.0092994	1	167	1	-2.957
RIBC1	6	0.0092309	0.0093579	1	168	1	-3.7886
VPS18	6	0.0092808	0.009413	1	169	1	-0.54884
DPRX	6	0.0093306	0.0094652	1	170	1	-3.107
PROSER2	6	0.0093804	0.0095131	1	171	1	-2.9376
RXRB	6	0.0094303	0.0095567	1	172	1	-2.0741
RCOR3	6	0.0094801	0.009608	1	173	1	-2.7159
HIST1H2AI	6	0.0095299	0.0096607	1	174	1	-1.5277
LGALS8	6	0.0095797	0.0097086	1	175	1	-2.8571
LARGE	6	0.0096296	0.0097685	1	176	1	-2.5994
C1GALT1C1	6	0.0096794	0.0098207	1	177	1	-2.9504
NYAP2	6	0.0097292	0.0098706	1	178	1	-3.3265
SPDYE6	1	0.0098275	0.0097757	1	179	0	-0.45712
WTIP	6	0.0098786	0.010033	1	180	1	-2.6834
SORCS3	6	0.0099783	0.010125	1	181	1	-3.6591
KLK15	6	0.010028	0.010173	1	182	1	-2.6333
PNRC1	6	0.010078	0.010218	1	183	1	-1.4621
SS18	6	0.010128	0.010263	1	184	1	-2.8571
PARD6A	6	0.010177	0.010309	1	185	1	-3.3448
CXCL14	6	0.010227	0.010356	1	186	1	-3.0118
AP3M2	6	0.010327	0.010454	1	187	1	-3.2357
CAMK2N2	6	0.010377	0.01051	1	188	1	-4.066
PIK3R4	6	0.010426	0.010554	1	189	1	-3.4062
GLIPR1L1	6	0.010476	0.010609	1	190	1	-3.3997
PTCHD3	6	0.010526	0.010655	1	191	1	-3.748
TCEAL2	6	0.010576	0.010702	1	192	1	-3.4062
AKR1B1	6	0.010675	0.010788	1	193	1	-3.2251
ERVMER34-1	6	0.010725	0.010838	1	194	1	-3.5441
LRRC7	6	0.010874	0.010976	1	195	1	-1.9215
RAP1A	6	0.010924	0.011023	1	196	1	-2.4329
MAFB	6	0.010974	0.011071	1	197	1	-3.501
ZZEF1	6	0.011024	0.011123	1	198	1	-3.1821
ATP8A2	6	0.011123	0.011225	1	199	1	-2.0474
hsa-mir-548al	4	0.011187	0.011212	1	200	1	-1.1158
SERPINA5	6	0.011322	0.011433	1	201	1	-3.5847
SLC4A4	6	0.011422	0.011542	1	202	1	-3.6939
BDP1	6	0.011472	0.011581	1	203	1	-2.8091
CACNG3	6	0.011521	0.011616	1	204	1	-3.2588
RBAK-LOC389458	2	0.011535	0.011561	1	205	0	-1.6926
C1orf86	6	0.011571	0.01167	1	206	1	-1.7689
MAB21L1	6	0.011621	0.011716	1	207	1	-2.0152
TMEM131	6	0.011671	0.011758	1	208	1	-1.4621
RANBP9	6	0.01172	0.011807	1	209	1	-3.4104
SMPD4	6	0.01177	0.011858	1	210	1	-3.5576
STAT6	6	0.011869	0.01195	1	211	1	-3.3448
FAM153A	6	0.011919	0.012001	1	212	1	-3.4528
FAM162B	6	0.011969	0.012054	1	213	1	-3.2251
VAV2	6	0.012118	0.012201	1	214	1	-4.0368
GTPBP10	6	0.012168	0.01225	1	215	1	-2.8091
DIAPH3	6	0.012217	0.012297	1	216	1	-1.3095
ZNF282	6	0.012267	0.012349	1	217	1	-3.107
OR52N4	6	0.012317	0.012398	1	218	1	-3.1699
FAM13A	6	0.012367	0.012445	1	219	1	-3.1656
hsa-mir-184	4	0.012398	0.012405	1	220	1	-2.8472
CS	6	0.012416	0.0125	1	221	1	-3.151
MLH3	6	0.012466	0.012553	1	222	1	-2.7899
MSH4	6	0.012516	0.012607	1	223	1	-2.6087
SCFD1	6	0.012565	0.012657	1	224	1	-2.7369
PUM2	6	0.012715	0.012794	1	225	1	-2.4495
ZDHHC2	6	0.012764	0.01285	1	226	1	-3.3265
PTGES2	6	0.012814	0.012894	1	227	1	-3.1724
TBL1X	6	0.012913	0.013003	1	228	1	-2.4677
CDK9	6	0.012963	0.013052	1	229	1	-1.8536
SLCO2A1	6	0.013013	0.013098	1	230	1	-2.4595
ACAN	6	0.013062	0.013154	1	231	1	-2.7403
TNKS	6	0.013112	0.013205	1	232	1	-2.3117
RBBP6	6	0.013162	0.013258	1	233	1	-1.7278
ITIH4	6	0.013211	0.013299	1	234	1	-3.121
AK9	6	0.013261	0.013349	1	235	1	-3.3975
KLRC4	6	0.013311	0.013397	1	236	1	-3.5391
PPP1R42	6	0.01336	0.01345	1	237	1	-3.4155
KCNK4	6	0.01341	0.013497	1	238	1	-3.151
TMEM87A	6	0.01346	0.013541	1	239	1	-1.7689
hsa-mir-431	4	0.013509	0.013518	1	240	1	-2.6333
hsa-mir-4779	4	0.013641	0.013653	1	241	1	-2.0122
DCN	6	0.013658	0.013743	1	242	1	-2.6162
CA5B	6	0.013758	0.013837	1	243	1	-3.2738
FAM174B	6	0.013807	0.013893	1	244	1	-3.6414
NRG2	6	0.013857	0.013949	1	245	1	-3.0944
AUNIP	6	0.013956	0.014044	1	246	1	-2.6087
GP1BB	6	0.014006	0.014083	1	247	1	-2.5262
N6AMT2	6	0.014055	0.014131	1	248	1	-3.2776
FGFBP2	6	0.014105	0.01417	1	249	1	-2.1999
RRP15	6	0.014155	0.014224	1	250	1	-2.3258
KCTD2	6	0.014204	0.01427	1	251	1	-3.0944
TMEM18	6	0.014304	0.01438	1	252	1	-2.8571
USP24	6	0.014353	0.014431	1	253	1	-2.9504
TSPAN6	6	0.014403	0.014486	1	254	1	-2.7656
SOX30	6	0.014453	0.014532	1	255	1	-3.4552
ACADM	6	0.014502	0.014576	1	256	1	-2.7159
KDSR	6	0.014601	0.014668	1	257	1	-3.107
SNUPN	6	0.014651	0.014718	1	258	1	-3.2525
hsa-mir-30c-2	4	0.014668	0.014716	1	259	1	-1.1158
RBMY1B	1	0.014687	0.014574	1	260	0	-2.4135
SLC26A3	6	0.01475	0.014812	1	261	1	-3.0343
TNS4	6	0.014849	0.01491	1	262	1	-3.0944
CD164	6	0.014899	0.01497	1	263	1	-2.9894
OR7C1	6	0.014949	0.01501	1	264	1	-1.9413
C4orf32	6	0.014998	0.01506	1	265	1	-1.5752
OLFM3	6	0.015147	0.015215	1	266	1	-2.1545
TSTD3	6	0.015197	0.01526	1	267	1	-3.2437
PLEKHA5	6	0.015246	0.015313	1	268	1	-2.6241
C11orf84	6	0.015296	0.015359	1	269	1	-3.3537
NPSR1	6	0.015345	0.015402	1	270	1	-3.4062
LACC1	6	0.015395	0.015447	1	271	1	-1.6926
DDX28	6	0.015444	0.015493	1	272	1	-2.4974
hsa-mir-600	4	0.015496	0.015566	1	273	0	-2.6241
hsa-mir-4722	4	0.015496	0.015566	1	274	0	-3.151
hsa-mir-615	4	0.015496	0.015566	1	275	0	-1.1158
TMEM82	6	0.015544	0.015608	1	276	1	-2.4044
ATIC	6	0.015593	0.01566	1	277	1	-2.4029
hsa-mir-2054	3	0.015638	0.015592	1	278	0	-0.85014
OR52M1	6	0.015643	0.015705	1	279	1	-4.2503
AANAT	6	0.015692	0.015757	1	280	1	-2.6333
MBOAT2	6	0.015742	0.015807	1	281	1	-2.7189
RFPL4A	6	0.015791	0.015857	1	282	1	-3.6963
DEFB135	6	0.015841	0.015901	1	283	1	-2.557
FAM160A1	6	0.015891	0.01595	1	284	1	-3.0891
BHLHE22	6	0.01594	0.016004	1	285	1	-2.3303
ATXN3	6	0.01599	0.016051	1	286	1	-2.6784
hsa-mir-580	4	0.016025	0.016102	1	287	0	-1.8536
BCKDHA	6	0.016039	0.016099	1	288	1	-2.5005
MTA2	6	0.016089	0.016153	1	289	1	-2.9504
CLLU1OS	6	0.016138	0.0162	1	290	1	-3.0891
CDC42	6	0.016188	0.016249	1	291	1	-3.2251
TBC1D10B	6	0.016237	0.016293	1	292	1	-3.151
PDIA4	6	0.016287	0.016341	1	293	1	-2.4829
GAGE12J	1	0.016298	0.016195	1	294	0	-1.7407
TTC39C	6	0.016337	0.01639	1	295	1	-2.4741
LRRC43	6	0.016386	0.016445	1	296	1	-3.1219
TBC1D8B	6	0.016436	0.016503	1	297	1	-2.9752
GOLGA2	6	0.016485	0.016554	1	298	1	-3.1225
hsa-mir-6754	4	0.016505	0.016573	1	299	0	-1.8536
SLC47A2	6	0.016535	0.016596	1	300	1	-3.3217
RGS1	6	0.016584	0.016646	1	301	1	-3.3265
CDH23	6	0.016634	0.016702	1	302	1	-2.8917
P2RX2	6	0.016683	0.01675	1	303	1	-3.4826
CYP21A2	6	0.016782	0.016849	1	304	1	-3.3537
FMO1	6	0.016832	0.016894	1	305	1	-3.0118
L2HGDH	6	0.016881	0.016943	1	306	1	-3.2157
hsa-mir-6769b	4	0.016918	0.016987	1	307	0	-2.536
HN1L	6	0.016931	0.016985	1	308	1	-4.0069
LMX1B	6	0.01703	0.017086	1	309	1	-2.9504
RFPL2	6	0.017079	0.017132	1	310	1	-2.8895
TRIM8	6	0.017129	0.017176	1	311	1	-3.6007
hsa-mir-4730	4	0.017149	0.017223	1	312	0	-1.699
AMY1A	6	0.017178	0.017228	1	313	1	-3.9383
TPTE2	6	0.017228	0.017273	1	314	1	-1.3815
CDC40	6	0.017277	0.017321	1	315	1	-2.8004
hsa-mir-583	4	0.017282	0.017368	1	316	0	-2.557
TMEM211	6	0.017327	0.017374	1	317	1	-1.945
COPG2	6	0.017376	0.017422	1	318	1	-3.0483
RPP40	6	0.017426	0.017472	1	319	1	-2.0122
NEGR1	6	0.017525	0.017579	1	320	1	-2.6535
NOD1	6	0.017574	0.01763	1	321	1	-2.3983
ZNF202	6	0.017624	0.017686	1	322	1	-2.6333
KNCN	6	0.017673	0.017734	1	323	1	-2.9752
RAB1A	6	0.017723	0.017789	1	324	1	-3.0329
SAMSN1	6	0.017822	0.017901	1	325	1	-3.5576
GPR182	6	0.01797	0.018062	1	326	1	-1.9807
CAAP1	6	0.01802	0.018115	1	327	1	-2.7159
ACOT1	6	0.018069	0.01816	1	328	1	-3.6007
ACTL6B	6	0.018119	0.018214	1	329	1	-2.8091
PTGES	6	0.018168	0.018257	1	330	1	-1.3095
KCMF1	6	0.018218	0.018298	1	331	1	-2.8065
ARRB2	6	0.018267	0.018357	1	332	1	-3.501
MOB1A	6	0.018317	0.018401	1	333	1	-2.307
hsa-mir-33b	4	0.018355	0.018406	1	334	0	-2.2477
AKAP11	6	0.018366	0.018445	1	335	1	-3.2776
hsa-mir-3673	2	0.018522	0.018427	1	336	0	-0.89625
C18orf8	6	0.018539	0.018624	1	337	1	-2.6583
CENPI	6	0.018539	0.018624	1	338	1	-1.9608
AKR1C4	6	0.018539	0.018624	1	339	1	-3.0944
ZSWIM2	6	0.018663	0.018751	1	340	1	-3.7428
ACER3	6	0.018712	0.018792	1	341	1	-3.8178
SNX7	6	0.018762	0.018838	1	342	1	-2.8091
ATG4C	6	0.018811	0.018889	1	343	1	-2.9504
GCNT2	6	0.01886	0.018936	1	344	1	-3.151
SPATA25	6	0.01891	0.018992	1	345	1	-1.8059
C22orf31	6	0.018959	0.019047	1	346	1	-2.8571
RAB43	6	0.019009	0.019097	1	347	1	-1.824
SCGN	6	0.019058	0.019152	1	348	1	-3.0329
AKAP6	6	0.019108	0.019205	1	349	1	-3.1364
GNAT1	6	0.019157	0.01925	1	350	1	-2.8571
KIF2B	6	0.019206	0.019298	1	351	1	-3.9633
SERPINB12	6	0.019256	0.019347	1	352	1	-3.3265
CLDND1	6	0.01933	0.019421	1	353	1	-2.4003
MRFAP1	6	0.01933	0.019421	1	354	1	-2.6828
FCRL2	6	0.019404	0.019502	1	355	1	-3.1809
PECAM1	6	0.019454	0.019547	1	356	1	-2.7899
UBR4	6	0.019503	0.019592	1	357	1	-3.1254
SSNA1	6	0.019552	0.019642	1	358	1	-2.1711
LOC440243	2	0.019558	0.019482	1	359	0	-1.2656
IBSP	6	0.019602	0.019689	1	360	1	-3.0399
EFCAB7	6	0.019651	0.019739	1	361	1	-2.5262
ALDH3A1	6	0.019701	0.019791	1	362	1	-3.2279
KLF3	6	0.01975	0.019842	1	363	1	-2.7159
MTMR9	6	0.019799	0.019887	1	364	1	-3.6007
COX7A1	6	0.019849	0.019931	1	365	1	-3.107
FAM96B	6	0.019898	0.019972	1	366	1	-1.4621
ANKRD34B	6	0.019997	0.020083	1	367	1	-4.094
FOCAD	6	0.020046	0.020137	1	368	1	-2.729
OPRM1	6	0.020096	0.020195	1	369	1	-3.4086
FGFBP3	6	0.020145	0.020244	1	370	1	-3.0277
MAPKBP1	6	0.020244	0.02033	1	371	1	-3.8369
BECN1	6	0.020293	0.02037	1	372	1	-1.5359
C19orf57	6	0.020392	0.02047	1	373	1	-2.5262
FAM216A	6	0.020392	0.02047	1	374	1	-3.3265
TXLNB	6	0.020491	0.02056	1	375	1	-3.397
SYT6	6	0.02054	0.020614	1	376	1	-2.8921
ASB9	6	0.020589	0.020665	1	377	1	-2.1999
TBC1D4	6	0.020639	0.020728	1	378	1	-3.0399
SLC46A1	6	0.020688	0.020778	1	379	1	-1.7883
TRIM64	6	0.020737	0.020826	1	380	1	-3.2597
CC2D2B	6	0.020787	0.020875	1	381	1	-3.2923
hsa-mir-6811	4	0.020797	0.020841	1	382	0	-2.3959
hsa-mir-3656	4	0.020797	0.020841	1	383	0	-2.9206
hsa-mir-1910	4	0.020797	0.020841	1	384	0	-1.5277
hsa-mir-1299	4	0.020797	0.020841	1	385	0	-0.85014
hsa-mir-193a	4	0.020797	0.020841	1	386	0	-1.6951
hsa-mir-6851	4	0.020797	0.020841	1	387	0	-0.85014
hsa-mir-4750	4	0.020797	0.020841	1	388	0	-2.2107
hsa-mir-4763	4	0.020797	0.020841	1	389	0	-2.557
hsa-mir-223	4	0.020797	0.020841	1	390	0	-2.6906
hsa-mir-4712	4	0.020797	0.020841	1	391	0	-2.702
hsa-mir-548s	4	0.020797	0.020841	1	392	0	-2.1302
HIST1H2AK	6	0.020836	0.020922	1	393	1	-3.0399
RPL39	6	0.020886	0.02097	1	394	1	-2.2477
TRIAP1	6	0.020984	0.021079	1	395	1	-2.6241
ELMSAN1	6	0.021034	0.02113	1	396	1	-2.557
ZNF558	6	0.021132	0.021235	1	397	1	-2.3303
HPCAL1	6	0.021231	0.021329	1	398	1	-3.0153
CC2D1A	6	0.02128	0.021376	1	399	1	-2.8481
FAM46D	6	0.02133	0.021428	1	400	1	-3.8702
GPRC5D	6	0.021379	0.021478	1	401	1	-3.6132
HLA-DMA	6	0.021527	0.021638	1	402	1	-3.8317
RAVER1	6	0.021576	0.021689	1	403	1	-2.6687
ZBTB45	6	0.021626	0.021741	1	404	1	-3.0685
SNAI2	6	0.021675	0.021789	1	405	1	-2.3206
OXSR1	6	0.021724	0.021837	1	406	1	-2.4003
C7	6	0.021773	0.021882	1	407	1	-2.6
TBX2	6	0.021872	0.02199	1	408	1	-3.8637
MYOZ3	6	0.021971	0.022086	1	409	1	-2.9658
SNX10	6	0.02202	0.022138	1	410	1	-1.5334
IFITM3	6	0.022069	0.022189	1	411	1	-2.5262
GNB1	6	0.022168	0.022285	1	412	0	-3.5663
ZNF213	6	0.022217	0.022336	1	413	0	-2.8832
SLC25A20	6	0.022267	0.02238	1	414	0	-2.6333
EPG5	6	0.022316	0.022425	1	415	0	-2.0244
GSTZ1	6	0.022365	0.022483	1	416	0	-2.5985
KIF26B	6	0.022414	0.022533	1	417	0	-2.7656
AKAP3	6	0.022464	0.022574	1	418	0	-2.6856
PITX1	6	0.022513	0.022624	1	419	0	-3.1685
NACA	6	0.022562	0.022671	1	420	0	-2.6856
LSM1	6	0.022612	0.022713	1	421	0	-3.4395
KLHL2	6	0.022661	0.022764	1	422	0	-2.8035
hsa-mir-548l	4	0.02269	0.022736	1	423	0	-2.8091
hsa-mir-4508	4	0.022937	0.022978	1	424	0	-2.054
USP6NL	6	0.023153	0.023254	1	425	0	-2.4829
CDHR1	6	0.023153	0.023254	1	426	0	-3.2251
REPS1	6	0.023153	0.023254	1	427	0	-3.6532
CASP12	6	0.023153	0.023254	1	428	0	-2.8829
CIRH1A	6	0.023153	0.023254	1	429	0	-2.4393
PSORS1C1	6	0.023153	0.023254	1	430	0	-3.0685
KLHL31	6	0.023153	0.023254	1	431	0	-1.7914
NDUFB4	6	0.023153	0.023254	1	432	0	-2.7947
ACTL8	6	0.023153	0.023254	1	433	0	-2.75
UQCRB	6	0.023153	0.023254	1	434	0	-3.3724
BRF2	6	0.023153	0.023254	1	435	0	-2.557
PPY	6	0.023153	0.023254	1	436	0	-1.7883
NR1D1	6	0.023153	0.023254	1	437	0	-3.1742
NBPF24	3	0.02326	0.023368	1	438	0	-3.7911
FZR1	6	0.023597	0.023695	1	439	0	-3.0329
SLC24A4	6	0.023646	0.023737	1	440	0	-2.7369
ZNF594	6	0.023794	0.023892	1	441	0	-4.1252
FAM188A	6	0.023843	0.023945	1	442	0	-3.4093
OR5J2	6	0.023892	0.023989	1	443	0	-3.414
MYH2	6	0.02399	0.024083	1	444	0	-3.3724
BET3L	6	0.02404	0.024138	1	445	0	-3.5233
NPR3	6	0.024138	0.024231	1	446	0	-4.2776
NBPF1	6	0.024187	0.024284	1	447	0	-2.7947
DCT	6	0.024286	0.024378	1	448	0	-2.4329
OXSM	6	0.024335	0.024418	1	449	0	-3.1699
HLA-DOA	6	0.024384	0.024468	1	450	0	-3.5847
NHP2	6	0.024433	0.024515	1	451	0	-2.2477
CYSTM1	6	0.024483	0.024561	1	452	0	-3.501
ZDHHC13	6	0.024532	0.024615	1	453	0	-2.9248
ZFP92	6	0.024581	0.024665	1	454	0	-2.6068
MGAT5B	6	0.024655	0.024742	1	455	0	-3.6532
UGT1A10	2	0.024715	0.024667	1	456	0	-6.5516
CATSPER3	6	0.024729	0.02482	1	457	0	-3.107
PROK2	6	0.024778	0.024872	1	458	0	-3.107
PLSCR3	6	0.024827	0.024918	1	459	0	-3.5618
FCN3	6	0.024925	0.025014	1	460	0	-3.4826
TEX13A	6	0.024974	0.025059	1	461	0	-2.8832
CAMTA1	6	0.025073	0.025148	1	462	0	-3.874
C6orf10	6	0.025073	0.025148	1	463	0	-3.7454
NDST3	6	0.025073	0.025148	1	464	0	-2.5262
hsa-mir-4791	4	0.025124	0.025156	1	465	0	-1.8709
hsa-mir-6841	4	0.025124	0.025156	1	466	0	-4.1252
ACY3	6	0.025196	0.025275	1	467	0	-2.3258
TMCO2	6	0.025196	0.025275	1	468	0	-2.5635
hsa-mir-3129	3	0.025274	0.025368	1	469	0	-2.3258
ARHGAP36	6	0.025319	0.025401	1	470	0	-3.8637
TBC1D13	6	0.025368	0.025441	1	471	0	-2.7794
hsa-mir-6886	4	0.025403	0.025416	1	472	0	-2.2477
YIF1A	6	0.025417	0.025494	1	473	0	-2.6333
TSPY1	6	0.025466	0.025542	1	474	0	-4.6341
FAM162A	6	0.025515	0.025596	1	475	0	-3.0118
SCARB2	6	0.025564	0.025641	1	476	0	-4.2097
C12orf54	4	0.025649	0.025657	1	477	0	-4.3653
TGOLN2	6	0.025687	0.02577	1	478	0	-2.9658
OR51B5	6	0.025687	0.02577	1	479	0	-2.7899
GANAB	6	0.02581	0.025888	1	480	0	-2.9504
DMRTA2	6	0.02581	0.025888	1	481	0	-2.8895
GTPBP1	6	0.025908	0.025996	1	482	0	-2.7947
NOSTRIN	5	0.025928	0.025974	1	483	0	-0.85014
SAFB2	6	0.025958	0.026057	1	484	0	-3.3385
PKIA	6	0.026031	0.026121	1	485	0	-2.8207
ACSL5	6	0.026031	0.026121	1	486	0	-3.748
OVOL1	6	0.026105	0.026201	1	487	0	-2.4329
BSX	6	0.026154	0.026247	1	488	0	-1.405
hsa-mir-3120	2	0.026186	0.026117	1	489	0	-1.6388
PCDHGC5	2	0.026186	0.026117	1	490	0	-1.7214
KYNU	6	0.026252	0.026343	1	491	0	-2.3303
STOM	6	0.026301	0.026392	1	492	0	-2.6906
LTBP2	6	0.026351	0.026437	1	493	0	-2.307
FOXH1	6	0.0264	0.026494	1	494	0	-2.7899
CYB5RL	6	0.026449	0.026549	1	495	0	-3.1685
SIX5	6	0.026498	0.026599	1	496	0	-2.6087
RIMS4	6	0.026547	0.026642	1	497	0	-3.1685
NDUFS6	6	0.026596	0.026695	1	498	0	-3.2983
DEXI	6	0.026645	0.026745	1	499	0	-3.0685
C17orf102	6	0.026694	0.026801	1	500	0	-3.2251
DCAF7	6	0.026793	0.026891	1	501	0	-3.6101
FKBP14	6	0.026793	0.026891	1	502	0	-3.629
FASLG	6	0.026793	0.026891	1	503	0	-2.5896
COX5B	6	0.026915	0.027014	1	504	0	-2.6856
AAGAB	6	0.026915	0.027014	1	505	0	-3.107
TCEB3C	6	0.026989	0.027091	1	506	0	-3.5643
NPC1L1	6	0.027038	0.02713	1	507	0	-4.1569
CDYL2	6	0.027087	0.027169	1	508	0	-2.8829
hsa-mir-4436a	4	0.02711	0.027084	1	509	0	-2.5896
USP50	6	0.027136	0.027216	1	510	0	-3.2776
AMFR	6	0.02721	0.027296	1	511	0	-1.3815
AZU1	6	0.02721	0.027296	1	512	0	-2.8917
MPP5	6	0.027284	0.027384	1	513	0	-2.8832
GRIN3A	6	0.027333	0.027428	1	514	0	-2.6333
PPP2R5B	6	0.027406	0.027507	1	515	0	-2.8091
CAPSL	6	0.02748	0.027579	1	516	0	-0.85014
C3orf33	6	0.027529	0.027628	1	517	0	-2.0474
HOXB6	6	0.027578	0.027675	1	518	0	-1.7278
ZNF32	6	0.027627	0.027722	1	519	0	-3.501
ZDHHC7	6	0.027676	0.027766	1	520	0	-3.4062
CRYL1	6	0.027725	0.027813	1	521	0	-3.7021
ENDOU	6	0.027823	0.027905	1	522	0	-2.7947
USP19	6	0.027823	0.027905	1	523	0	-3.9415
RSC1A1	6	0.027921	0.027993	1	524	0	-3.1656
FTSJD1	4	0.027929	0.027898	1	525	0	-2.3303
OTOP2	6	0.02797	0.028041	1	526	0	-2.8185
MEDAG	6	0.02802	0.02809	1	527	0	-3.1685
HOXC5	6	0.028069	0.028148	1	528	0	-3.501
CCDC81	6	0.028142	0.028218	1	529	0	-3.5659
ZNF706	6	0.028142	0.028218	1	530	0	-2.6333
TOX4	6	0.028216	0.028296	1	531	0	-2.4168
ARNT	6	0.028265	0.028343	1	532	0	-3.5643
CLEC1B	6	0.028314	0.0284	1	533	0	-2.4466
USP17L24	2	0.029339	0.029279	1	534	0	-5.1254
CCL4L1	5	0.029468	0.029534	1	535	0	-3.1791
hsa-mir-4758	4	0.029797	0.029742	1	536	0	-2.527
ZNF765	5	0.030775	0.030829	1	537	0	-0.85014
hsa-mir-1288	4	0.030893	0.030827	1	538	0	-3.9633
hsa-mir-5705	4	0.030893	0.030827	1	539	0	-1.4621
hsa-mir-3622a	4	0.030893	0.030827	1	540	0	-4.4813
TNFSF10	6	0.031032	0.031106	1	541	0	-3.6101
MARCKSL1	6	0.031032	0.031106	1	542	0	-3.1656
RPS17	6	0.031032	0.031106	1	543	0	-4.2097
KATNAL2	6	0.031032	0.031106	1	544	0	-3.5618
FAM98A	6	0.031032	0.031106	1	545	0	-3.7428
RRP1	6	0.031032	0.031106	1	546	0	-2.4064
BIN2	6	0.031032	0.031106	1	547	0	-3.1225
SMOC1	6	0.031032	0.031106	1	548	0	-2.4829
C8orf34	6	0.031032	0.031106	1	549	0	-3.2525
CPNE4	6	0.031032	0.031106	1	550	0	-4.0224
RAP1GAP	6	0.031032	0.031106	1	551	0	-3.2588
FANCA	6	0.031032	0.031106	1	552	0	-2.7159
MINK1	6	0.031032	0.031106	1	553	0	-2.9752
CALHM2	6	0.031032	0.031106	1	554	0	-2.307
OR2L2	6	0.031032	0.031106	1	555	0	-3.1685
CENPQ	6	0.031032	0.031106	1	556	0	-3.4395
AGFG1	6	0.031032	0.031106	1	557	0	-3.0277
PYROXD1	6	0.031032	0.031106	1	558	0	-1.5752
ZNF592	6	0.031032	0.031106	1	559	0	-3.3537
MTHFSD	6	0.031032	0.031106	1	560	0	-2.7947
MSN	6	0.031032	0.031106	1	561	0	-3.0329
RAD51AP1	6	0.031032	0.031106	1	562	0	-3.6101
ATP6AP1L	6	0.031032	0.031106	1	563	0	-3.3937
CORO7-PAM16	6	0.031032	0.031106	1	564	0	-3.525
TMEM223	6	0.031032	0.031106	1	565	0	-4.1252
MED24	6	0.031032	0.031106	1	566	0	-2.2002
EIF4A3	6	0.031032	0.031106	1	567	0	-1.588
ETNK2	6	0.031032	0.031106	1	568	0	-2.9504
BIK	6	0.031032	0.031106	1	569	0	-2.3303
RNF5	6	0.031032	0.031106	1	570	0	-3.2251
HSD17B1	6	0.031032	0.031106	1	571	0	-2.8737
SLC9A8	6	0.031032	0.031106	1	572	0	-2.4986
PIP5K1B	6	0.031032	0.031106	1	573	0	-2.6358
AMDHD2	6	0.031032	0.031106	1	574	0	-2.8917
FOXB2	6	0.031032	0.031106	1	575	0	-3.4561
LRRC37A3	6	0.031032	0.031106	1	576	0	-2.2312
TAS2R46	6	0.031032	0.031106	1	577	0	-3.1195
IDH3B	6	0.031032	0.031106	1	578	0	-3.5643
GRIK1	6	0.031032	0.031106	1	579	0	-2.9186
COL8A1	6	0.031032	0.031106	1	580	0	-2.307
VILL	6	0.031032	0.031106	1	581	0	-3.0118
TIMM8B	6	0.031032	0.031106	1	582	0	-2.181
FOXA2	6	0.031032	0.031106	1	583	0	-3.4561
KCNAB2	6	0.031032	0.031106	1	584	0	-3.3265
MTMR2	6	0.031032	0.031106	1	585	0	-2.307
SEC16B	6	0.031032	0.031106	1	586	0	-3.1685
C9orf57	6	0.031032	0.031106	1	587	0	-1.7278
FKTN	6	0.031032	0.031106	1	588	0	-2.8857
ANKRD13D	6	0.031032	0.031106	1	589	0	-2.307
HOXD8	6	0.031032	0.031106	1	590	0	-3.0399
ARSD	6	0.031032	0.031106	1	591	0	-1.874
CGGBP1	6	0.031032	0.031106	1	592	0	-2.7159
CACNG8	6	0.031032	0.031106	1	593	0	-3.5118
TMEM88	6	0.031032	0.031106	1	594	0	-3.7886
ZFHX3	6	0.031032	0.031106	1	595	0	-2.3606
NHLRC4	6	0.031032	0.031106	1	596	0	-3.1742
FFAR3	6	0.031032	0.031106	1	597	0	-2.5262
SHISA6	6	0.031032	0.031106	1	598	0	-3.6799
STEAP3	6	0.031032	0.031106	1	599	0	-2.5262
RP2	6	0.031032	0.031106	1	600	0	-2.2743
PPFIBP1	6	0.031032	0.031106	1	601	0	-3.2971
DDHD1	6	0.031032	0.031106	1	602	0	-2.8436
SPOCK3	6	0.031032	0.031106	1	603	0	-2.7266
GLTP	6	0.031032	0.031106	1	604	0	-3.9474
NMS	6	0.031032	0.031106	1	605	0	-3.6132
OR11G2	6	0.031032	0.031106	1	606	0	-4.0207
MIIP	6	0.031032	0.031106	1	607	0	-2.9894
SPHK1	6	0.031032	0.031106	1	608	0	-2.6333
SLCO1B1	6	0.031032	0.031106	1	609	0	-3.7021
PBXIP1	6	0.031032	0.031106	1	610	0	-3.6232
SETDB2	6	0.031032	0.031106	1	611	0	-2.9907
USP31	6	0.031032	0.031106	1	612	0	-3.5576
CRHR2	6	0.031032	0.031106	1	613	0	-3.0443
SRSF2	6	0.031032	0.031106	1	614	0	-2.6333
ABCG2	6	0.031032	0.031106	1	615	0	-3.1624
SERINC2	6	0.031032	0.031106	1	616	0	-2.8481
OR52K2	6	0.031032	0.031106	1	617	0	-3.2923
RBM8A	6	0.031032	0.031106	1	618	0	-1.4621
MT1A	6	0.031032	0.031106	1	619	0	-2.4064
P2RY11	6	0.031032	0.031106	1	620	0	-3.7021
TARS	6	0.031032	0.031106	1	621	0	-3.0944
FSBP	6	0.031032	0.031106	1	622	0	-2.75
RPS25	6	0.031032	0.031106	1	623	0	-3.2525
TLL2	6	0.031032	0.031106	1	624	0	-2.9658
VAV1	6	0.031032	0.031106	1	625	0	-3.1699
OR5A2	6	0.031032	0.031106	1	626	0	-2.6241
ZNF35	6	0.031032	0.031106	1	627	0	-3.0318
TAX1BP1	6	0.031032	0.031106	1	628	0	-3.1685
POLI	6	0.031032	0.031106	1	629	0	-2.7103
TMEM135	6	0.031032	0.031106	1	630	0	-3.0944
PDP2	6	0.031032	0.031106	1	631	0	-2.8653
ARHGEF6	6	0.031032	0.031106	1	632	0	-2.8857
GPR75-ASB3	3	0.032022	0.03211	1	633	0	-2.8917
GAGE12B	2	0.032273	0.03222	1	634	0	-4.9684
hsa-mir-519b	2	0.032331	0.032279	1	635	0	-3.0116
hsa-let-7a-2	4	0.033555	0.033523	1	636	0	-2.533
hsa-mir-765	4	0.033555	0.033523	1	637	0	-1.7883
hsa-mir-3135b	4	0.033555	0.033523	1	638	0	-1.5752
hsa-mir-3689d-1	4	0.033555	0.033523	1	639	0	-2.5297
hsa-mir-3960	4	0.033555	0.033523	1	640	0	-2.1545
PRAMEF8	4	0.033555	0.033523	1	641	0	-2.1999
hsa-mir-378d-2	4	0.033555	0.033523	1	642	0	-1.9311
hsa-mir-6500	4	0.033555	0.033523	1	643	0	-1.874
hsa-mir-378f	4	0.033555	0.033523	1	644	0	-1.7278
hsa-mir-200b	4	0.033555	0.033523	1	645	0	-2.054
SLC30A1	6	0.033744	0.033866	1	646	0	-2.8917
VPS36	6	0.033793	0.033912	1	647	0	-2.8335
GPR110	6	0.033891	0.034015	1	648	0	-2.0244
hsa-mir-761	3	0.033975	0.034031	1	649	0	-2.54
HIAT1	6	0.034208	0.03434	1	650	0	-3.151
PROKR1	6	0.034208	0.03434	1	651	0	-2.6087
MT1E	6	0.034208	0.03434	1	652	0	-2.9986
PUS10	6	0.034208	0.03434	1	653	0	-2.3258
RSAD1	6	0.034208	0.03434	1	654	0	-3.3265
IL21R	6	0.034208	0.03434	1	655	0	-3.2035
ZAR1	6	0.034208	0.03434	1	656	0	-2.5262
GPR25	6	0.034208	0.03434	1	657	0	-1.9156
CASP8AP2	6	0.034208	0.03434	1	658	0	-2.1999
YME1L1	6	0.034208	0.03434	1	659	0	-3.3265
TLX1NB	6	0.034549	0.03467	1	660	0	-2.9894
CHST1	6	0.034549	0.03467	1	661	0	-2.9894
ACAD11	6	0.034623	0.034742	1	662	0	-3.1742
RET	6	0.034769	0.0349	1	663	0	-4.1721
AURKAIP1	6	0.034769	0.0349	1	664	0	-2.539
CROT	6	0.034769	0.0349	1	665	0	-2.2347
USP26	6	0.034769	0.0349	1	666	0	-4.1252
FLVCR1	6	0.034769	0.0349	1	667	0	-3.7594
CCRL1	5	0.034789	0.034802	1	668	0	-3.233
PRAMEF18	5	0.034789	0.034802	1	669	0	-4.0224
LHX5	6	0.034915	0.035036	1	670	0	-2.4044
COX7C	6	0.034964	0.035089	1	671	0	-2.3959
PEBP1	6	0.035013	0.035141	1	672	0	-3.4552
DDX60L	6	0.035061	0.035194	1	673	0	-2.8571
STXBP2	6	0.03511	0.035239	1	674	0	-2.4716
TMEM120B	6	0.035159	0.035294	1	675	0	-2.6087
CREB1	6	0.035208	0.035348	1	676	0	-2.3415
SLC35E1	6	0.035305	0.035451	1	677	0	-2.7325
A2ML1	6	0.035378	0.035521	1	678	0	-3.7813
KLRC1	6	0.035378	0.035521	1	679	0	-3.501
ABLIM1	6	0.035451	0.035589	1	680	0	-2.8472
LRCH2	6	0.0355	0.035637	1	681	0	-3.8702
SDS	6	0.035549	0.035688	1	682	0	-3.2776
ACVR1B	6	0.035598	0.035737	1	683	0	-3.1391
MLANA	6	0.035646	0.035784	1	684	0	-2.4393
TXNIP	6	0.035695	0.035837	1	685	0	-2.1999
ANKRD37	6	0.035744	0.035877	1	686	0	-3.0012
SP2	6	0.035792	0.035928	1	687	0	-3.151
NRTN	6	0.035841	0.035987	1	688	0	-3.4629
MCCC2	6	0.03589	0.036043	1	689	0	-2.8114
BMP2	6	0.035939	0.036092	1	690	0	-3.0143
GOLGA3	6	0.035987	0.036138	1	691	0	-1.902
MTRNR2L5	4	0.036001	0.036	1	692	0	-2.3077
FAM102A	6	0.036036	0.036187	1	693	0	-2.6856
MUC2	6	0.036085	0.036231	1	694	0	-3.5643
UTP3	6	0.036158	0.036304	1	695	0	-2.4329
APBA1	6	0.036158	0.036304	1	696	0	-3.382
PDF	6	0.036231	0.036366	1	697	0	-1.8604
DAOA	6	0.03628	0.036412	1	698	0	-2.054
hsa-mir-548ag-1	4	0.036326	0.036304	1	699	0	-1.3095
TTPA	6	0.036377	0.03652	1	700	0	-2.3077
POLQ	6	0.036377	0.03652	1	701	0	-3.6591
WRAP53	6	0.036523	0.036676	1	702	0	-3.151
UPP1	6	0.036572	0.036722	1	703	0	-1.133
SPRED1	6	0.036669	0.036815	1	704	0	-2.1545
CLCNKA	6	0.036669	0.036815	1	705	0	-2.6241
OTOF	6	0.036669	0.036815	1	706	0	-3.0574
CNGA2	6	0.036766	0.036926	1	707	0	-2.2803
FBXW10	6	0.036864	0.037025	1	708	0	-1.1189
PCDHGA11	2	0.036912	0.036829	1	709	0	-3.757
BPIFB4	6	0.03701	0.037191	1	710	0	-3.8724
CPA2	6	0.037059	0.037248	1	711	0	-2.6241
CYYR1	6	0.037132	0.037318	1	712	0	-3.8637
IL17A	6	0.037132	0.037318	1	713	0	-3.5576
UPK3B	6	0.037448	0.037632	1	714	0	-3.5643
INTS9	6	0.037448	0.037632	1	715	0	-2.6
KRT27	6	0.037448	0.037632	1	716	0	-3.5983
COL5A3	6	0.037448	0.037632	1	717	0	-2.1545
ADM2	6	0.037448	0.037632	1	718	0	-1.824
GJB1	6	0.037448	0.037632	1	719	0	-4.092
SDC4	6	0.037448	0.037632	1	720	0	-2.6828
C11orf80	6	0.037448	0.037632	1	721	0	-3.2062
SAMM50	6	0.037448	0.037632	1	722	0	-2.8681
MGA	6	0.03774	0.037938	1	723	0	-3.151
TLE1	6	0.037788	0.037983	1	724	0	-1.7568
hsa-mir-647	4	0.037807	0.037766	1	725	0	-2.1486
SEL1L3	6	0.037861	0.038061	1	726	0	-3.2375
CCZ1	6	0.037934	0.03813	1	727	0	-2.9528
ABCB10	6	0.037983	0.038182	1	728	0	-3.107
WFDC1	6	0.038032	0.038229	1	729	0	-2.561
hsa-mir-4688	4	0.038051	0.038	1	730	0	-2.2828
PGAP2	6	0.03808	0.038288	1	731	0	-3.2983
CR2	6	0.038226	0.03843	1	732	0	-2.1545
PAEP	6	0.038226	0.03843	1	733	0	-2.9186
FAM101B	6	0.038226	0.03843	1	734	0	-1.8627
CFC1	6	0.038226	0.03843	1	735	0	-3.8544
BPIFA1	6	0.038372	0.038581	1	736	0	-3.151
POM121C	5	0.038465	0.038429	1	737	0	-2.0741
DOCK4	5	0.038465	0.038429	1	738	0	-3.4104
hsa-mir-3646	4	0.038734	0.038679	1	739	0	-2.6856
hsa-mir-379	4	0.038734	0.038679	1	740	0	-3.4231
USP17L12	1	0.038803	0.038687	1	741	0	-3.9648
PAGE2	6	0.038931	0.039136	1	742	0	-3.5118
CPSF4L	6	0.038931	0.039136	1	743	0	-2.4981
RING1	6	0.038931	0.039136	1	744	0	-2.3663
LRCH4	6	0.038931	0.039136	1	745	0	-2.7266
SLK	6	0.038931	0.039136	1	746	0	-2.8482
ZNF526	6	0.038931	0.039136	1	747	0	-2.6241
JAM3	6	0.038931	0.039136	1	748	0	-2.8571
ZNF658	6	0.038931	0.039136	1	749	0	-2.7159
HEXDC	6	0.038931	0.039136	1	750	0	-2.5521
APOH	6	0.038931	0.039136	1	751	0	-3.8271
FBXL18	6	0.038931	0.039136	1	752	0	-3.0944
ANKRD33	6	0.038931	0.039136	1	753	0	-2.8832
THOC7	6	0.038931	0.039136	1	754	0	-3.107
PWWP2B	6	0.038931	0.039136	1	755	0	-3.0219
GMPPB	6	0.038931	0.039136	1	756	0	-2.2477
TIAM2	6	0.038931	0.039136	1	757	0	-3.151
FAM227A	6	0.038931	0.039136	1	758	0	-2.9206
RABEP1	6	0.038931	0.039136	1	759	0	-2.7524
SMIM20	6	0.038931	0.039136	1	760	0	-2.1999
ZNF682	6	0.038931	0.039136	1	761	0	-1.3095
hsa-mir-4775	3	0.039021	0.039064	1	762	0	-1.3815
hsa-mir-522	3	0.039021	0.039064	1	763	0	-2.54
VEGFC	6	0.039489	0.039693	1	764	0	-4.2379
SUPV3L1	6	0.039538	0.039744	1	765	0	-2.8571
ESF1	6	0.039587	0.039795	1	766	0	-2.8091
HNF4A	6	0.039635	0.039844	1	767	0	-3.2357
PCDHA8	2	0.039662	0.039586	1	768	0	-3.064
LCAT	6	0.039732	0.039936	1	769	0	-3.3537
KRTAP5-1	6	0.039732	0.039936	1	770	0	-2.9186
KRT9	6	0.039732	0.039936	1	771	0	-3.0483
TAS2R43	6	0.039829	0.040035	1	772	0	-2.3663
WDR43	6	0.039878	0.040084	1	773	0	-2.0474
TNFAIP6	6	0.039951	0.040151	1	774	0	-2.307
OR1J2	6	0.040048	0.040257	1	775	0	-3.1754
ROCK1	6	0.040048	0.040257	1	776	0	-3.2971
PRDM2	6	0.040169	0.040381	1	777	0	-3.3809
CNPY1	6	0.040218	0.040433	1	778	0	-4.3093
TAC1	6	0.040266	0.040483	1	779	0	-2.2592
OR10H1	6	0.040315	0.040542	1	780	0	-3.0118
DERA	6	0.040388	0.040612	1	781	0	-3.2525
ACAD8	6	0.04046	0.04069	1	782	0	-3.0944
GAPDHS	6	0.040606	0.040843	1	783	0	-3.0329
BTN3A2	6	0.040606	0.040843	1	784	0	-3.9109
EML3	6	0.040606	0.040843	1	785	0	-0.85014
PDIA2	6	0.040606	0.040843	1	786	0	-2.6421
hsa-mir-3657	4	0.040634	0.040534	1	787	0	-2.1545
GML	6	0.040752	0.041017	1	788	0	-2.8091
ZSCAN16	6	0.0408	0.041054	1	789	0	-3.3414
HSP90B1	6	0.040849	0.041105	1	790	0	-1.9215
hsa-mir-132	4	0.040862	0.040751	1	791	0	-2.1105
FAR2	6	0.040921	0.041174	1	792	0	-2.307
OR10AD1	6	0.040921	0.041174	1	793	0	-2.5863
OR1E1	6	0.040994	0.041244	1	794	0	-3.7324
POC1B	6	0.041043	0.041286	1	795	0	-3.7768
AHCYL1	6	0.041115	0.041357	1	796	0	-2.307
SYT1	6	0.0416	0.041831	1	797	0	-2.6333
RGSL1	6	0.0416	0.041831	1	798	0	-2.7159
TOMM70A	6	0.0416	0.041831	1	799	0	-2.181
RHOBTB1	6	0.0416	0.041831	1	800	0	-3.3658
FRRS1	6	0.0416	0.041831	1	801	0	-2.128
IQGAP2	6	0.0416	0.041831	1	802	0	-3.2251
CD177	6	0.0416	0.041831	1	803	0	-3.7911
SSBP3	6	0.0416	0.041831	1	804	0	-3.6101
AP2A1	6	0.0416	0.041831	1	805	0	-3.8369
GPRIN2	6	0.0416	0.041831	1	806	0	-1.8099
MAPK13	6	0.0416	0.041831	1	807	0	-1.9908
ZBTB6	6	0.0416	0.041831	1	808	0	-3.8207
LRRCC1	6	0.0416	0.041831	1	809	0	-1.9574
TIMP2	6	0.0416	0.041831	1	810	0	-3.8061
FOPNL	6	0.0416	0.041831	1	811	0	-3.2525
hsa-mir-4251	4	0.041819	0.041682	1	812	0	-1.7214
SPPL3	6	0.042061	0.042285	1	813	0	-3.1225
CASC3	6	0.042109	0.042331	1	814	0	-3.2357
C16orf71	6	0.042206	0.042437	1	815	0	-3.5847
hsa-mir-1294	4	0.04224	0.042079	1	816	0	-3.8358
OR5F1	6	0.042303	0.042537	1	817	0	-3.4565
GAB3	6	0.042303	0.042537	1	818	0	-3.4011
YKT6	6	0.042303	0.042537	1	819	0	-2.7899
CTRC	6	0.0424	0.042624	1	820	0	-2.5876
PPP1R3G	6	0.042448	0.042679	1	821	0	-2.307
DGUOK	6	0.042497	0.042732	1	822	0	-3.4062
FBXW8	6	0.042618	0.042854	1	823	0	-3.4104
EXOC3L1	6	0.042618	0.042854	1	824	0	-2.8472
EEF2	6	0.042618	0.042854	1	825	0	-1.7883
MICU2	6	0.042618	0.042854	1	826	0	-2.1545
ABCC10	6	0.042739	0.042984	1	827	0	-2.9752
LHX3	6	0.042836	0.043075	1	828	0	-2.6723
BUB1B	6	0.042933	0.043175	1	829	0	-3.107
hsa-mir-8055	4	0.042937	0.042787	1	830	0	-2.5946
MLC1	6	0.042981	0.043221	1	831	0	-3.2251
LILRA5	6	0.043029	0.043271	1	832	0	-3.3221
OPN3	6	0.043078	0.043311	1	833	0	-3.3537
SLC22A11	6	0.043126	0.043355	1	834	0	-3.7428
PPP4R2	6	0.043175	0.043403	1	835	0	-2.9752
ARHGAP32	6	0.043247	0.043474	1	836	0	-2.6241
C8orf37	6	0.043247	0.043474	1	837	0	-2.3258
POTEE	3	0.043319	0.043373	1	838	0	-2.7266
SHCBP1L	6	0.04332	0.04355	1	839	0	-2.7266
LEFTY1	6	0.043368	0.043593	1	840	0	-2.6828
OR56A4	6	0.043465	0.043697	1	841	0	-2.5287
PMEL	6	0.043465	0.043697	1	842	0	-3.4948
SPRR2E	1	0.043516	0.043445	1	843	0	-2.0037
CEACAM6	6	0.04361	0.043851	1	844	0	-3.3937
FN1	6	0.04361	0.043851	1	845	0	-3.151
MICAL1	6	0.04361	0.043851	1	846	0	-2.9504
CHIT1	6	0.04378	0.044013	1	847	0	-3.3537
TEX35	6	0.04378	0.044013	1	848	0	-2.1333
FKBP11	6	0.04378	0.044013	1	849	0	-3.107
HSPA2	6	0.04378	0.044013	1	850	0	-2.9504
hsa-mir-3139	4	0.043828	0.043681	1	851	0	-1.6017
hsa-mir-199b	4	0.043828	0.043681	1	852	0	-1.9173
MRPS30	6	0.043901	0.04412	1	853	0	-2.4329
SERBP1	6	0.043949	0.044163	1	854	0	-3.3537
APCDD1	6	0.04436	0.044571	1	855	0	-3.4062
OR8H1	6	0.04436	0.044571	1	856	0	-2.9206
ZCCHC7	6	0.04436	0.044571	1	857	0	-1.262
TMEM180	6	0.04436	0.044571	1	858	0	-1.9866
HM13	6	0.04436	0.044571	1	859	0	-2.181
ATP2C2	6	0.04436	0.044571	1	860	0	-2.5262
MTUS2	6	0.04436	0.044571	1	861	0	-3.2812
F11R	6	0.04436	0.044571	1	862	0	-3.0932
DEPDC7	6	0.04436	0.044571	1	863	0	-3.0944
WNK4	6	0.04436	0.044571	1	864	0	-3.5643
CAMK2N1	6	0.04436	0.044571	1	865	0	-2.9658
POLR3G	6	0.04436	0.044571	1	866	0	-2.1545
SETMAR	6	0.04436	0.044571	1	867	0	-2.4028
EIF4EBP2	6	0.04436	0.044571	1	868	0	-2.8832
ZNF429	6	0.04436	0.044571	1	869	0	-2.7899
EI24	6	0.044771	0.044978	1	870	0	-2.1999
IL11	6	0.044844	0.045052	1	871	0	-3.2776
TSPYL5	6	0.044844	0.045052	1	872	0	-2.6333
CCL8	6	0.044989	0.04519	1	873	0	-2.8681
GPR37	6	0.044989	0.04519	1	874	0	-2.7325
DCBLD2	6	0.044989	0.04519	1	875	0	-3.5801
SEMA3D	6	0.044989	0.04519	1	876	0	-2.6723
MYL6	6	0.04511	0.045313	1	877	0	-2.8571
hsa-mir-6790	4	0.045656	0.045444	1	878	0	-2.1999
NR5A1	6	0.045979	0.046142	1	879	0	-3.0501
CCNDBP1	6	0.045979	0.046142	1	880	0	-2.8681
TTC17	6	0.045979	0.046142	1	881	0	-3.5643
ZNF165	6	0.045979	0.046142	1	882	0	-2.6087
TOR2A	6	0.045979	0.046142	1	883	0	-1.8627
AFM	6	0.045979	0.046142	1	884	0	-3.1685
LLPH	6	0.045979	0.046142	1	885	0	-2.307
GLYCTK	6	0.045979	0.046142	1	886	0	-2.8004
CDC14B	6	0.045979	0.046142	1	887	0	-3.6641
FAM170B	6	0.045979	0.046142	1	888	0	-2.8091
CHMP2B	6	0.045979	0.046142	1	889	0	-3.0309
TRIM27	6	0.045979	0.046142	1	890	0	-3.3937
LAMB3	6	0.045979	0.046142	1	891	0	-2.6087
SLC35G3	6	0.045979	0.046142	1	892	0	-3.5118
EIF4G1	6	0.045979	0.046142	1	893	0	-2.2032
DCLRE1A	6	0.045979	0.046142	1	894	0	-3.1685
SPRYD3	6	0.045979	0.046142	1	895	0	-1.9551
DUXA	6	0.045979	0.046142	1	896	0	-3.2035
VSX2	6	0.045979	0.046142	1	897	0	-1.8395
AKR7A2	6	0.045979	0.046142	1	898	0	-2.6723
TET1	6	0.045979	0.046142	1	899	0	-2.8832
FIG4	6	0.045979	0.046142	1	900	0	-2.6241
MOCS2	6	0.045979	0.046142	1	901	0	-2.6333
SCO1	6	0.045979	0.046142	1	902	0	-3.4104
ATXN1L	6	0.045979	0.046142	1	903	0	-1.755
MYL1	6	0.045979	0.046142	1	904	0	-3.0329
C10orf32	6	0.045979	0.046142	1	905	0	-2.4003
ANO3	6	0.045979	0.046142	1	906	0	-2.557
KISS1	6	0.045979	0.046142	1	907	0	-3.0944
WNT8A	6	0.046848	0.047021	1	908	0	-3.7049
WDTC1	6	0.046896	0.047067	1	909	0	-3.2812
OLFML2A	6	0.046969	0.047143	1	910	0	-2.9658
LATS2	6	0.046969	0.047143	1	911	0	-2.18
hsa-mir-195	4	0.047013	0.046767	1	912	0	-2.8571
MVB12B	6	0.047065	0.047235	1	913	0	-1.7689
WWC2	6	0.047065	0.047235	1	914	0	-2.6828
hsa-mir-548i-2	3	0.047239	0.047264	1	915	0	-4.092
FAM72B	2	0.047423	0.04731	1	916	0	-3.2525
POMGNT2	4	0.048449	0.048215	1	917	0	-2.702
HIST3H2BB	6	0.049908	0.05007	1	918	0	-2.8482
JAGN1	6	0.049908	0.05007	1	919	0	-2.9658
MUC21	6	0.049908	0.05007	1	920	0	-3.0329
TRMT6	6	0.049908	0.05007	1	921	0	-1.7689
SCMH1	6	0.049908	0.05007	1	922	0	-2.7289
TLR8	6	0.049908	0.05007	1	923	0	-3.2035
ABCB5	6	0.049908	0.05007	1	924	0	-2.3181
NRDE2	6	0.049908	0.05007	1	925	0	-3.6163
KRT82	6	0.049908	0.05007	1	926	0	-3.3745
FAM110A	6	0.049908	0.05007	1	927	0	-2.8737
TCTN1	6	0.049908	0.05007	1	928	0	-2.7159
MLLT4	6	0.049908	0.05007	1	929	0	-3.5154
IQCG	6	0.049908	0.05007	1	930	0	-3.0118
IL18RAP	6	0.049908	0.05007	1	931	0	-2.6333
AKAP7	6	0.049908	0.05007	1	932	0	-2.75
IST1	6	0.049908	0.05007	1	933	0	-2.54
NPHS2	6	0.049908	0.05007	1	934	0	-3.2357
ZNF664	6	0.049908	0.05007	1	935	0	-3.6163
MPPED1	6	0.049908	0.05007	1	936	0	-3.5991
NRIP3	6	0.049908	0.05007	1	937	0	-3.9474
SYT11	6	0.049908	0.05007	1	938	0	-4.3225
ZNF224	6	0.049908	0.05007	1	939	0	-1.9241
UQCRQ	6	0.049908	0.05007	1	940	0	-3.2923
GTF3C1	6	0.049908	0.05007	1	941	0	-1.3435
DSC3	6	0.049908	0.05007	1	942	0	-3.8724
IBTK	6	0.049908	0.05007	1	943	0	-3.5847
ABCB4	6	0.049908	0.05007	1	944	0	-3.6799
IL6	6	0.049908	0.05007	1	945	0	-2.54
RNPS1	6	0.049908	0.05007	1	946	0	-2.1955
AIG1	6	0.049908	0.05007	1	947	0	-2.307
GBP7	6	0.049908	0.05007	1	948	0	-2.7422
SLC45A2	6	0.049908	0.05007	1	949	0	-2.307
PUS1	6	0.049908	0.05007	1	950	0	-3.1685
CA10	6	0.049908	0.05007	1	951	0	-2.5262
FGL2	6	0.049908	0.05007	1	952	0	-3.1505
DES	6	0.049908	0.05007	1	953	0	-3.4118
IAPP	6	0.049908	0.05007	1	954	0	-2.6421
CATSPER2	6	0.049908	0.05007	1	955	0	-2.5262
ACADSB	6	0.049908	0.05007	1	956	0	-3.3404
ADCY4	6	0.049908	0.05007	1	957	0	-2.1302
KIAA0391	6	0.049908	0.05007	1	958	0	-2.2025
INTS1	6	0.049908	0.05007	1	959	0	-2.6162
PCNT	6	0.049908	0.05007	1	960	0	-3.107
BAI3	6	0.049908	0.05007	1	961	0	-4.0471
PSMD8	6	0.049908	0.05007	1	962	0	-2.75
KIF11	6	0.049908	0.05007	1	963	0	-3.1742
KLF9	6	0.049908	0.05007	1	964	0	-2.1999
TEKT1	6	0.049908	0.05007	1	965	0	-2.3303
SLC30A6	6	0.049908	0.05007	1	966	0	-3.1685
MYL9	6	0.049908	0.05007	1	967	0	-2.5946
VNN2	6	0.049908	0.05007	1	968	0	-3.9747
SPDYA	6	0.049908	0.05007	1	969	0	-2.3395
EBF4	6	0.049908	0.05007	1	970	0	-3.9415
HGSNAT	6	0.049908	0.05007	1	971	0	-2.54
GPR6	6	0.049908	0.05007	1	972	0	-3.2357
DUS4L	6	0.049908	0.05007	1	973	0	-2.9504
CMIP	6	0.049908	0.05007	1	974	0	-2.4595
DNAH12	6	0.049908	0.05007	1	975	0	-3.0574
SPATA16	6	0.049908	0.05007	1	976	0	-2.9752
CRIPAK	6	0.049908	0.05007	1	977	0	-3.6007
SRPK3	6	0.049908	0.05007	1	978	0	-3.4395
ARL4A	6	0.049908	0.05007	1	979	0	-2.1858
IQCK	6	0.049908	0.05007	1	980	0	-4.0904
TMEM104	6	0.049908	0.05007	1	981	0	-3.0551
RAP1GDS1	6	0.049908	0.05007	1	982	0	-2.6087
ASNS	6	0.049908	0.05007	1	983	0	-1.948
QRFPR	6	0.049908	0.05007	1	984	0	-2.9161
RSL1D1	6	0.049908	0.05007	1	985	0	-3.2776
MRPL51	6	0.049908	0.05007	1	986	0	-3.2357
OR10W1	6	0.049908	0.05007	1	987	0	-2.3606
MRVI1	6	0.049908	0.05007	1	988	0	-0.85014
SRGAP1	6	0.049908	0.05007	1	989	0	-3.2437
STARD7	6	0.049908	0.05007	1	990	0	-2.7159
C8orf4	6	0.049908	0.05007	1	991	0	-2.5652
CWC27	6	0.049908	0.05007	1	992	0	-2.1999
C1QB	6	0.049908	0.05007	1	993	0	-2.4003
RSPH10B2	6	0.049908	0.05007	1	994	0	-2.161
GARS	6	0.049908	0.05007	1	995	0	-1.7883
STOML2	6	0.049908	0.05007	1	996	0	-2.7266
MTRR	6	0.049908	0.05007	1	997	0	-2.9752
C10orf71	6	0.049908	0.05007	1	998	0	-2.9305
NPY4R	6	0.049908	0.05007	1	999	0	-2.557
C6orf25	6	0.049908	0.05007	1	1000	0	-3.2357
C22orf46	6	0.049908	0.05007	1	1001	0	-3.3448
FRK	6	0.049908	0.05007	1	1002	0	-3.3477
AQP4	6	0.049908	0.05007	1	1003	0	-2.7524
MFSD9	6	0.049908	0.05007	1	1004	0	-2.54
GJC3	6	0.049908	0.05007	1	1005	0	-3.1742
FAM8A1	6	0.049908	0.05007	1	1006	0	-2.4003
SNX20	6	0.049908	0.05007	1	1007	0	-4.121
PPP1R9A	6	0.049908	0.05007	1	1008	0	-4.1817
EDC4	6	0.049908	0.05007	1	1009	0	-2.78
E2F4	6	0.049908	0.05007	1	1010	0	-3.3937
DHRS13	6	0.049908	0.05007	1	1011	0	-2.7731
PTPN2	6	0.049908	0.05007	1	1012	0	-3.4205
MRPS21	6	0.049908	0.05007	1	1013	0	-2.9186
NDUFA6	6	0.049908	0.05007	1	1014	0	-3.2923
TBL1Y	6	0.049908	0.05007	1	1015	0	-2.0389
EPS8	6	0.049908	0.05007	1	1016	0	-3.5118
LRRC66	6	0.049908	0.05007	1	1017	0	-3.2971
CD79B	6	0.049908	0.05007	1	1018	0	-1.7278
LENEP	6	0.049908	0.05007	1	1019	0	-2.8065
MYO1G	6	0.049908	0.05007	1	1020	0	-3.3414
USP17L13	3	0.050433	0.05054	1	1021	0	-3.5154
C2orf27B	3	0.050845	0.050948	1	1022	0	-2.706
hsa-mir-3141	4	0.051687	0.051509	1	1023	0	-2.5519
hsa-mir-4734	4	0.051687	0.051509	1	1024	0	-2.8681
hsa-mir-579	4	0.051687	0.051509	1	1025	0	-2.5262
hsa-mir-4699	4	0.051687	0.051509	1	1026	0	-2.5896
hsa-mir-4417	4	0.051687	0.051509	1	1027	0	-1.3815
GTF2H2D	4	0.051687	0.051509	1	1028	0	-3.9251
hsa-mir-5703	4	0.051687	0.051509	1	1029	0	-2.9186
hsa-mir-1199	4	0.051687	0.051509	1	1030	0	-1.1158
hsa-mir-4446	4	0.051687	0.051509	1	1031	0	-0.70062
hsa-mir-593	4	0.051687	0.051509	1	1032	0	-2.9504
hsa-mir-933	4	0.051687	0.051509	1	1033	0	-3.1742
hsa-mir-450a-2	4	0.051687	0.051509	1	1034	0	-1.4621
hsa-mir-5690	4	0.051687	0.051509	1	1035	0	-1.1158
hsa-let-7d	4	0.051687	0.051509	1	1036	0	-3.6591
SGPL1	6	0.05272	0.052906	1	1037	0	-3.5214
APOE	6	0.052792	0.052977	1	1038	0	-3.2035
C6orf118	6	0.052792	0.052977	1	1039	0	-3.3728
ARAP3	6	0.052888	0.053063	1	1040	0	-3.3221
MAPK7	6	0.052888	0.053063	1	1041	0	-3.2525
LIPN	6	0.05296	0.053136	1	1042	0	-2.1235
C15orf43	6	0.053008	0.053186	1	1043	0	-4.1252
SFRP4	6	0.053056	0.053233	1	1044	0	-2.6333
PLXDC2	6	0.053176	0.053363	1	1045	0	-2.4044
LETMD1	6	0.053176	0.053363	1	1046	0	-2.6087
SCAND3	6	0.053176	0.053363	1	1047	0	-3.6556
SLC16A14	6	0.053176	0.053363	1	1048	0	-1.8536
C11orf30	6	0.053512	0.053676	1	1049	0	-3.7428
HSPA6	6	0.053512	0.053676	1	1050	0	-3.748
TAOK1	6	0.053512	0.053676	1	1051	0	-2.6396
CYTIP	6	0.053512	0.053676	1	1052	0	-2.0078
SCGB3A1	6	0.053512	0.053676	1	1053	0	-2.6332
ATP1A4	6	0.053512	0.053676	1	1054	0	-2.8832
FAM114A2	6	0.053512	0.053676	1	1055	0	-2.4829
TIGD1	6	0.053512	0.053676	1	1056	0	-2.6333
CYP26B1	6	0.053512	0.053676	1	1057	0	-2.5994
ERP29	6	0.0538	0.053957	1	1058	0	-3.501
C12orf10	6	0.0538	0.053957	1	1059	0	-2.9658
IL6ST	6	0.053872	0.054022	1	1060	0	-2.6267
MRPS26	6	0.053992	0.054151	1	1061	0	-3.0329
GABRG3	6	0.053992	0.054151	1	1062	0	-3.5233
SIGLEC12	6	0.053992	0.054151	1	1063	0	-2.9752
DNAH1	6	0.054112	0.054283	1	1064	0	-3.6414
ENTPD7	6	0.05416	0.054324	1	1065	0	-3.1652
GFOD2	6	0.054543	0.054684	1	1066	0	-3.7428
CBX7	6	0.054543	0.054684	1	1067	0	-3.16
KCNC4	6	0.054543	0.054684	1	1068	0	-2.8917
C15orf61	6	0.054543	0.054684	1	1069	0	-2.5262
PRNP	6	0.054543	0.054684	1	1070	0	-2.557
CAV1	6	0.054543	0.054684	1	1071	0	-2.8681
GGT7	6	0.054543	0.054684	1	1072	0	-1.8536
C16orf87	6	0.054543	0.054684	1	1073	0	-2.8917
GRM1	6	0.054543	0.054684	1	1074	0	-3.4552
SMC5	6	0.054543	0.054684	1	1075	0	-2.1999
CACNB2	6	0.054543	0.054684	1	1076	0	-3.107
PIF1	6	0.054543	0.054684	1	1077	0	-2.6856
ACD	6	0.054543	0.054684	1	1078	0	-2.6333
CCDC113	6	0.054543	0.054684	1	1079	0	-2.7656
CERS6	6	0.054951	0.055094	1	1080	0	-3.6414
IFNA2	6	0.054951	0.055094	1	1081	0	-3.8178
FAM107A	6	0.05507	0.055221	1	1082	0	-3.3537
OR2T1	6	0.055118	0.055273	1	1083	0	-3.0814
hsa-mir-4517	4	0.055318	0.055133	1	1084	0	-2.1858
hsa-mir-6842	4	0.055318	0.055133	1	1085	0	-2.557
hsa-mir-874	4	0.055318	0.055133	1	1086	0	-3.6939
hsa-mir-1469	4	0.055318	0.055133	1	1087	0	-2.75
ZFYVE19	6	0.055334	0.055489	1	1088	0	-3.3448
ZNF114	6	0.055334	0.055489	1	1089	0	-3.6281
SOWAHC	6	0.055334	0.055489	1	1090	0	-2.5262
ACSS3	6	0.055334	0.055489	1	1091	0	-2.8436
VPS41	6	0.055334	0.055489	1	1092	0	-2.6421
LYL1	6	0.055573	0.055728	1	1093	0	-3.2651
MVB12A	6	0.055645	0.055792	1	1094	0	-2.54
LENG9	6	0.055693	0.05584	1	1095	0	-3.1857
OR4L1	6	0.055789	0.055931	1	1096	0	-4.0224
RTN4	6	0.055789	0.055931	1	1097	0	-2.8681
CPPED1	6	0.055789	0.055931	1	1098	0	-3.9109
HOXB8	6	0.055908	0.056048	1	1099	0	-3.2588
ZNF484	6	0.055908	0.056048	1	1100	0	-3.151
N4BP1	6	0.05598	0.056117	1	1101	0	-2.837
PPA1	6	0.056052	0.056188	1	1102	0	-2.5135
CD247	6	0.056052	0.056188	1	1103	0	-3.1766
hsa-mir-4639	4	0.056168	0.05598	1	1104	0	-2.7947
TMEM177	6	0.056172	0.056308	1	1105	0	-2.5135
CLDN15	6	0.056172	0.056308	1	1106	0	-3.1685
LYN	6	0.056291	0.056417	1	1107	0	-3.0685
LOC391322	6	0.056291	0.056417	1	1108	0	-2.274
GPSM1	6	0.056363	0.056495	1	1109	0	-2.4329
SLC25A42	6	0.056531	0.056655	1	1110	0	-3.6101
TET2	6	0.056531	0.056655	1	1111	0	-3.6591
SLC7A14	6	0.056531	0.056655	1	1112	0	-3.339
CAMTA2	6	0.056531	0.056655	1	1113	0	-2.6856
GLRA1	6	0.056531	0.056655	1	1114	0	-2.4003
hsa-mir-425	4	0.056729	0.056549	1	1115	0	-2.054
hsa-mir-218-2	4	0.056729	0.056549	1	1116	0	-2.8571
hsa-mir-617	4	0.056729	0.056549	1	1117	0	-1.7103
GSTM2	5	0.05674	0.056883	1	1118	0	-3.0399
hsa-mir-5701-1	4	0.057161	0.056957	1	1119	0	-2.8114
GAGE12H	2	0.057177	0.057028	1	1120	0	-1.1959
SPANXD	3	0.057427	0.057551	1	1121	0	-3.2971
IAH1	6	0.057535	0.057673	1	1122	0	-3.6088
HIGD1C	6	0.057535	0.057673	1	1123	0	-3.5887
IMP4	6	0.057535	0.057673	1	1124	0	-2.533
MADCAM1	6	0.057535	0.057673	1	1125	0	-2.4003
MMD	6	0.057535	0.057673	1	1126	0	-3.0523
PDZRN3	6	0.057535	0.057673	1	1127	0	-1.7883
HDGF	6	0.057535	0.057673	1	1128	0	-2.9186
RB1	6	0.057535	0.057673	1	1129	0	-1.4451
TMEM150C	6	0.057535	0.057673	1	1130	0	-1.5752
KIAA0753	6	0.057535	0.057673	1	1131	0	-3.5233
OLFM4	6	0.057535	0.057673	1	1132	0	-2.9658
CD8A	6	0.057535	0.057673	1	1133	0	-2.5973
CA1	6	0.057535	0.057673	1	1134	0	-3.2251
PROCA1	6	0.057535	0.057673	1	1135	0	-3.3265
LRRC2	6	0.057535	0.057673	1	1136	0	-2.2592
ANKRD26	6	0.057535	0.057673	1	1137	0	-3.3265
TFF3	6	0.057535	0.057673	1	1138	0	-3.4506
HK1	6	0.057535	0.057673	1	1139	0	-2.6087
FOXN2	6	0.057535	0.057673	1	1140	0	-2.9967
ACOT9	6	0.057535	0.057673	1	1141	0	-3.2251
PSG4	6	0.057535	0.057673	1	1142	0	-3.6532
FLT3LG	6	0.057535	0.057673	1	1143	0	-2.061
PCDHB4	6	0.057535	0.057673	1	1144	0	-3.2651
TRIO	6	0.057535	0.057673	1	1145	0	-2.0474
SYCP2L	6	0.057535	0.057673	1	1146	0	-2.3236
TRIM54	6	0.057535	0.057673	1	1147	0	-2.4003
INPP5J	6	0.057535	0.057673	1	1148	0	-2.2648
MUC7	6	0.057535	0.057673	1	1149	0	-2.307
SLC5A7	6	0.057535	0.057673	1	1150	0	-1.8395
ADAMTS12	6	0.057535	0.057673	1	1151	0	-2.9658
hsa-mir-4478	4	0.05801	0.057801	1	1152	0	-2.8477
hsa-mir-4306	4	0.058186	0.057962	1	1153	0	-3.2447
ZNF540	6	0.058419	0.058567	1	1154	0	-3.3265
NTHL1	6	0.058491	0.058633	1	1155	0	-2.6664
FNBP1	6	0.058491	0.058633	1	1156	0	-2.5973
CYFIP1	6	0.058825	0.058979	1	1157	0	-3.0685
RGS12	6	0.058825	0.058979	1	1158	0	-3.8317
EPB41L1	6	0.058825	0.058979	1	1159	0	-2.557
C6orf223	6	0.058825	0.058979	1	1160	0	-2.2477
LY6K	6	0.058825	0.058979	1	1161	0	-3.8465
KRTAP19-6	6	0.058825	0.058979	1	1162	0	-1.4621
ITGB4	6	0.058825	0.058979	1	1163	0	-3.5983
RNF145	6	0.058825	0.058979	1	1164	0	-2.0244
PIGB	6	0.058825	0.058979	1	1165	0	-1.4621
TCEA1	6	0.058825	0.058979	1	1166	0	-3.3515
BAGE2	4	0.059066	0.058822	1	1167	0	-3.4626
MPPE1	6	0.059159	0.059298	1	1168	0	-2.8091
OR6C65	6	0.059159	0.059298	1	1169	0	-3.7021
hsa-mir-124-2	4	0.059162	0.058928	1	1170	0	-3.1685
hsa-mir-4676	4	0.059162	0.058928	1	1171	0	-2.6828
FAM111B	6	0.059231	0.059367	1	1172	0	-3.4104
FAM179A	6	0.059541	0.059674	1	1173	0	-3.6007
SNTB1	6	0.059541	0.059674	1	1174	0	-3.8858
DPY19L2	6	0.059541	0.059674	1	1175	0	-3.338
GK5	6	0.059541	0.059674	1	1176	0	-3.0584
ANKRD22	6	0.059541	0.059674	1	1177	0	-3.0329
VANGL1	6	0.059541	0.059674	1	1178	0	-3.0329
AMACR	6	0.059541	0.059674	1	1179	0	-3.107
CXCL6	6	0.059541	0.059674	1	1180	0	-2.5218
MMP14	6	0.059541	0.059674	1	1181	0	-3.5643
TNFRSF10D	6	0.059541	0.059674	1	1182	0	-1.9608
hsa-mir-6728	4	0.059674	0.059399	1	1183	0	-2.4313
PDE4D	6	0.059851	0.059983	1	1184	0	-2.4829
hsa-mir-6780b	4	0.059898	0.059611	1	1185	0	-3.1685
SPATA31A5	2	0.059898	0.059719	1	1186	0	-3.249
NUAK1	6	0.059923	0.060056	1	1187	0	-3.1655
SCOC	6	0.059923	0.060056	1	1188	0	-3.5847
DEFB107A	5	0.059971	0.060087	1	1189	0	-3.7911
HOXC12	6	0.059994	0.060122	1	1190	0	-3.3265
MRGBP	6	0.060066	0.060186	1	1191	0	-3.7021
ATXN7L3B	6	0.060185	0.060315	1	1192	0	-3.0081
CTXN3	6	0.060185	0.060315	1	1193	0	-3.5233
SALL1	6	0.060185	0.060315	1	1194	0	-2.4003
BLOC1S2	6	0.06028	0.060413	1	1195	0	-3.3448
hsa-mir-4274	4	0.060345	0.060059	1	1196	0	-3.1685
hsa-mir-6840	4	0.060345	0.060059	1	1197	0	-2.9658
ST8SIA6	6	0.060376	0.06052	1	1198	0	-1.5752
FAM25G	1	0.060384	0.06039	1	1199	0	-3.6044
BIRC3	6	0.060662	0.06081	1	1200	0	-3.3265
MAGI1	6	0.060662	0.06081	1	1201	0	-2.6241
SPEM1	6	0.060662	0.06081	1	1202	0	-3.2035
KANK1	6	0.060662	0.06081	1	1203	0	-2.7266
SGSM3	6	0.060662	0.06081	1	1204	0	-3.3724
C1orf158	6	0.060662	0.06081	1	1205	0	-2.6333
SETD9	6	0.060662	0.06081	1	1206	0	-1.3095
CDC42SE2	6	0.060662	0.06081	1	1207	0	-3.2139
R3HDML	6	0.060948	0.061104	1	1208	0	-3.3537
CARHSP1	6	0.060948	0.061104	1	1209	0	-2.6087
ZKSCAN3	6	0.060948	0.061104	1	1210	0	-3.8369
BMF	6	0.061162	0.061304	1	1211	0	-2.7532
CCDC138	6	0.061162	0.061304	1	1212	0	-3.107
POU2F1	6	0.061162	0.061304	1	1213	0	-1.7278
ANKRD28	6	0.061162	0.061304	1	1214	0	-2.6687
GSTT1	6	0.061162	0.061304	1	1215	0	-3.3728
ADAMTS10	6	0.061162	0.061304	1	1216	0	-2.5653
SERPINA11	6	0.061329	0.061478	1	1217	0	-2.6856
PCDHGA1	6	0.061377	0.061527	1	1218	0	-4.4335
KCNJ3	6	0.061448	0.061598	1	1219	0	-4.0904
NF1	6	0.061448	0.061598	1	1220	0	-3.2971
DEAF1	6	0.061567	0.061722	1	1221	0	-4.0051
ZNF850	6	0.061567	0.061722	1	1222	0	-1.874
TGFB3	6	0.061567	0.061722	1	1223	0	-3.2923
OR52I2	6	0.062067	0.062224	1	1224	0	-1.9215
MYO16	6	0.062067	0.062224	1	1225	0	-3.107
CYP4V2	6	0.062067	0.062224	1	1226	0	-2.6358
SCN11A	6	0.062067	0.062224	1	1227	0	-3.2776
GZF1	6	0.062067	0.062224	1	1228	0	-3.0143
KRTAP5-4	6	0.062067	0.062224	1	1229	0	-3.377
GJB3	6	0.062067	0.062224	1	1230	0	-3.6414
STXBP5L	6	0.062067	0.062224	1	1231	0	-2.4064
ISOC2	6	0.062067	0.062224	1	1232	0	-2.7266
KLRD1	6	0.062067	0.062224	1	1233	0	-2.6241
TTC27	6	0.062067	0.062224	1	1234	0	-1.6388
ADAMTS18	6	0.062067	0.062224	1	1235	0	-1.7278
PNPLA3	6	0.062067	0.062224	1	1236	0	-3.0766
TPH2	6	0.062067	0.062224	1	1237	0	-3.2357
hsa-mir-4785	4	0.062484	0.062225	1	1238	0	-2.4329
hsa-mir-4474	4	0.062484	0.062225	1	1239	0	-1.5752
hsa-mir-3615	4	0.062484	0.062225	1	1240	0	-1.5752
hsa-mir-6837	4	0.062484	0.062225	1	1241	0	-2.5863
DTL	6	0.06252	0.062681	1	1242	0	-3.3448
SRRM4	6	0.062591	0.062751	1	1243	0	-1.9215
GRM2	6	0.062686	0.062838	1	1244	0	-3.2971
PCDHGA12	2	0.062794	0.062614	1	1245	0	-2.0934
RAB7A	6	0.063019	0.063168	1	1246	0	-3.2035
PRRC1	6	0.063019	0.063168	1	1247	0	-3.3414
TIAM1	6	0.063019	0.063168	1	1248	0	-3.2923
CA6	6	0.063019	0.063168	1	1249	0	-2.6687
ABR	6	0.063019	0.063168	1	1250	0	-1.9608
ERI2	6	0.063019	0.063168	1	1251	0	-2.9504
SMG9	6	0.063019	0.063168	1	1252	0	-3.7021
SCARF1	6	0.063019	0.063168	1	1253	0	-3.4552
FBXL5	6	0.063019	0.063168	1	1254	0	-3.107
C5orf58	6	0.063019	0.063168	1	1255	0	-3.107
TAS2R31	6	0.063019	0.063168	1	1256	0	-3.2776
C1orf27	6	0.063328	0.0635	1	1257	0	-2.6988
CHMP1A	6	0.063376	0.063545	1	1258	0	-3.0277
OR51E2	6	0.063424	0.063599	1	1259	0	-3.9091
NTS	6	0.063495	0.063664	1	1260	0	-2.2746
UBE3D	6	0.063495	0.063664	1	1261	0	-3.2776
DUSP6	6	0.063709	0.063886	1	1262	0	-1.3623
ZNF699	6	0.063709	0.063886	1	1263	0	-2.7159
C3orf14	6	0.063709	0.063886	1	1264	0	-2.054
FSHR	6	0.063709	0.063886	1	1265	0	-3.2547
KRTAP10-12	6	0.063709	0.063886	1	1266	0	-2.8917
EFCAB13	6	0.063709	0.063886	1	1267	0	-3.3477
ZBED6CL	3	0.063919	0.063908	1	1268	0	-1.9564
COQ3	6	0.063923	0.064112	1	1269	0	-3.0685
CYP1B1	6	0.064042	0.064231	1	1270	0	-2.4044
GAGE1	6	0.064089	0.064276	1	1271	0	-5.351
SIGLEC10	5	0.064186	0.064287	1	1272	0	-3.7911
hsa-mir-1272	4	0.064254	0.064008	1	1273	0	-2.7821
hsa-mir-101-1	4	0.064254	0.064008	1	1274	0	-1.7317
VCX2	4	0.064779	0.064539	1	1275	0	-3.8262
ARHGEF18	6	0.065016	0.065186	1	1276	0	-2.6333
PCGF1	6	0.065016	0.065186	1	1277	0	-2.9206
TSPAN11	6	0.065016	0.065186	1	1278	0	-2.0474
BZRAP1	6	0.065016	0.065186	1	1279	0	-2.4792
VWA2	6	0.065016	0.065186	1	1280	0	-3.0944
SRP72	6	0.065016	0.065186	1	1281	0	-2.557
TLDC1	6	0.065016	0.065186	1	1282	0	-2.7635
TMEM257	6	0.065016	0.065186	1	1283	0	-3.2971
HSPD1	6	0.065016	0.065186	1	1284	0	-2.6333
TGFBR3	6	0.065016	0.065186	1	1285	0	-2.8917
OR6C70	6	0.065016	0.065186	1	1286	0	-2.7794
LOC283710	6	0.065016	0.065186	1	1287	0	-2.9504
IGFN1	6	0.065016	0.065186	1	1288	0	-3.5643
NDUFA2	6	0.065016	0.065186	1	1289	0	-2.5262
PATE1	6	0.065016	0.065186	1	1290	0	-3.4629
LRIT2	6	0.065016	0.065186	1	1291	0	-2.837
DTWD2	6	0.065016	0.065186	1	1292	0	-2.0565
HLA-DQB2	6	0.065016	0.065186	1	1293	0	-3.3893
CTSF	6	0.065016	0.065186	1	1294	0	-2.8114
SOGA2	6	0.065016	0.065186	1	1295	0	-2.6087
MAPK1	6	0.065016	0.065186	1	1296	0	-2.8114
FMN1	6	0.065016	0.065186	1	1297	0	-3.2357
ZCCHC10	6	0.065016	0.065186	1	1298	0	-2.0314
TTLL6	6	0.065016	0.065186	1	1299	0	-2.5262
ACOT2	6	0.065016	0.065186	1	1300	0	-2.7266
MMP17	6	0.065016	0.065186	1	1301	0	-2.7635
PODXL	6	0.065016	0.065186	1	1302	0	-3.2588
TLR10	6	0.065016	0.065186	1	1303	0	-3.0399
SIGLEC15	6	0.065016	0.065186	1	1304	0	-1.7279
F12	6	0.065016	0.065186	1	1305	0	-3.2296
LOC100289561	6	0.065016	0.065186	1	1306	0	-2.4495
PEX1	6	0.065016	0.065186	1	1307	0	-2.8832
BSDC1	6	0.065016	0.065186	1	1308	0	-2.6
hsa-mir-550a-1	4	0.065209	0.064977	1	1309	0	-5.1264
hsa-mir-6511b-1	3	0.06608	0.066054	1	1310	0	-2.7266
ELFN1	6	0.066155	0.066338	1	1311	0	-3.4552
VAMP5	6	0.066155	0.066338	1	1312	0	-3.698
MMP8	6	0.066155	0.066338	1	1313	0	-2.8832
MS4A2	6	0.066155	0.066338	1	1314	0	-3.6414
LAG3	6	0.066155	0.066338	1	1315	0	-2.7266
KLC3	6	0.066155	0.066338	1	1316	0	-2.2477
LCP1	6	0.066155	0.066338	1	1317	0	-3.2911
PTBP3	6	0.066155	0.066338	1	1318	0	-2.307
STAG2	6	0.066463	0.066657	1	1319	0	-3.7049
AMPD3	6	0.066463	0.066657	1	1320	0	-2.5262
RARB	6	0.066558	0.066751	1	1321	0	-3.3227
USP17L11	6	0.066605	0.066801	1	1322	0	-5.4054
hsa-mir-3617	4	0.066768	0.066559	1	1323	0	-3.6101
SFTPD	6	0.066795	0.066979	1	1324	0	-3.0483
PRRG1	6	0.066795	0.066979	1	1325	0	-2.6333
SYNRG	6	0.066795	0.066979	1	1326	0	-3.2157
RASAL3	6	0.066795	0.066979	1	1327	0	-2.557
TM9SF1	6	0.066795	0.066979	1	1328	0	-3.1162
CT47A1	6	0.066985	0.067158	1	1329	0	-4.9269
KRTAP10-3	6	0.067696	0.067851	1	1330	0	-3.0944
CACNA1I	6	0.067696	0.067851	1	1331	0	-2.8832
BRD8	6	0.067696	0.067851	1	1332	0	-2.9206
NRN1	6	0.067696	0.067851	1	1333	0	-2.54
HS6ST1	6	0.067696	0.067851	1	1334	0	-3.5441
THEG	6	0.067696	0.067851	1	1335	0	-3.3537
MMADHC	6	0.067696	0.067851	1	1336	0	-2.7266
TMEM192	6	0.067696	0.067851	1	1337	0	-3.6939
RAB2A	6	0.067696	0.067851	1	1338	0	-3.2525
SAMHD1	6	0.067696	0.067851	1	1339	0	-2.9504
SLC52A1	6	0.067696	0.067851	1	1340	0	-3.5656
ACACA	6	0.067696	0.067851	1	1341	0	-3.3024
ATP8B2	6	0.067696	0.067851	1	1342	0	-2.7159
ZNF624	6	0.067696	0.067851	1	1343	0	-3.7164
SPP2	6	0.067696	0.067851	1	1344	0	-3.2357
KIAA1244	6	0.067696	0.067851	1	1345	0	-2.8065
SNAP47	6	0.067696	0.067851	1	1346	0	-3.4104
ERLIN1	6	0.067696	0.067851	1	1347	0	-3.3265
PSMD9	6	0.067696	0.067851	1	1348	0	-2.4677
ZNF22	6	0.067696	0.067851	1	1349	0	-1.3138
CHRDL1	6	0.067696	0.067851	1	1350	0	-3.0399
NDUFA3	6	0.067696	0.067851	1	1351	0	-3.1505
PIGV	6	0.067696	0.067851	1	1352	0	-3.501
FASTKD3	6	0.067696	0.067851	1	1353	0	-2.7899
ME3	6	0.067696	0.067851	1	1354	0	-3.3724
TRIM39-RPP21	2	0.068167	0.067981	1	1355	0	-4.9594
PLEKHG3	6	0.068359	0.068519	1	1356	0	-2.9695
MOSPD1	6	0.06843	0.068576	1	1357	0	-3.1751
KLHL15	6	0.06843	0.068576	1	1358	0	-3.2192
NDUFB9	6	0.068643	0.068793	1	1359	0	-2.54
ESX1	6	0.068643	0.068793	1	1360	0	-3.4957
UBE2E3	6	0.068643	0.068793	1	1361	0	-2.4829
SYCE1	6	0.068785	0.068921	1	1362	0	-2.4716
OR5P3	6	0.068879	0.069012	1	1363	0	-3.5441
HIST1H4I	6	0.068927	0.069064	1	1364	0	-3.1742
hsa-mir-6763	4	0.068975	0.06878	1	1365	0	-2.5653
AMY2A	4	0.068975	0.06878	1	1366	0	-2.8917
LCE6A	6	0.069187	0.069346	1	1367	0	-3.0329
MYL2	6	0.069187	0.069346	1	1368	0	-2.7159
BST1	6	0.069187	0.069346	1	1369	0	-3.1656
LIMCH1	6	0.069187	0.069346	1	1370	0	-2.7266
RANBP17	6	0.069187	0.069346	1	1371	0	-2.8207
P2RY6	6	0.069187	0.069346	1	1372	0	-2.1366
TMEM39B	6	0.069187	0.069346	1	1373	0	-2.2107
UNC93A	6	0.069187	0.069346	1	1374	0	-3.3537
TCF15	6	0.069187	0.069346	1	1375	0	-2.7213
PCDHA1	6	0.069447	0.069597	1	1376	0	-5.0318
AGAP2	6	0.069494	0.069642	1	1377	0	-2.8114
LOC100288332	4	0.069562	0.069382	1	1378	0	-4.0032
DMXL1	6	0.069589	0.069743	1	1379	0	-2.7159
EME1	6	0.069684	0.069832	1	1380	0	-2.8091
SRF	6	0.069825	0.069975	1	1381	0	-3.2251
FITM1	6	0.069873	0.070019	1	1382	0	-2.9376
WWP2	6	0.069967	0.070112	1	1383	0	-2.7973
TPST2	6	0.070038	0.070198	1	1384	0	-2.1999
LGALS3	6	0.070038	0.070198	1	1385	0	-2.7524
C15orf53	6	0.070298	0.070463	1	1386	0	-2.8114
CXCL2	6	0.070298	0.070463	1	1387	0	-2.7159
TECTA	6	0.070298	0.070463	1	1388	0	-3.6799
TTC8	6	0.070298	0.070463	1	1389	0	-3.3414
NEURL1B	6	0.070298	0.070463	1	1390	0	-3.2983
MRFAP1L1	6	0.070298	0.070463	1	1391	0	-2.6068
PSORS1C2	6	0.070298	0.070463	1	1392	0	-3.7049
SPRED2	6	0.070298	0.070463	1	1393	0	-2.4393
CERCAM	6	0.070298	0.070463	1	1394	0	-2.216
ZNF692	6	0.070605	0.07078	1	1395	0	-3.9859
NTM	6	0.070605	0.07078	1	1396	0	-3.6939
SUN2	6	0.070605	0.07078	1	1397	0	-2.6333
CCR4	6	0.070605	0.07078	1	1398	0	-3.2251
hsa-mir-188	4	0.070688	0.070509	1	1399	0	-2.4329
hsa-mir-219b	4	0.070688	0.070509	1	1400	0	-2.7369
KIAA0146	6	0.070724	0.070908	1	1401	0	-3.512
SPATA31A1	6	0.070771	0.070959	1	1402	0	-3.6425
KCNQ3	6	0.071125	0.07131	1	1403	0	-1.5752
FOLR1	6	0.071125	0.07131	1	1404	0	-2.9658
SLC9A1	6	0.071125	0.07131	1	1405	0	-2.9186
RNF168	6	0.071125	0.07131	1	1406	0	-2.8114
KIAA0355	6	0.071125	0.07131	1	1407	0	-2.0474
KCNQ4	6	0.071125	0.07131	1	1408	0	-3.5576
ALKBH2	6	0.071125	0.07131	1	1409	0	-3.29
LOC100130370	6	0.071125	0.07131	1	1410	0	-3.5983
DPCD	6	0.071125	0.07131	1	1411	0	-3.5233
UBC	6	0.071125	0.07131	1	1412	0	-3.1656
CEP41	6	0.071125	0.07131	1	1413	0	-3.3042
YTHDF2	6	0.071125	0.07131	1	1414	0	-2.0474
NQO2	6	0.071125	0.07131	1	1415	0	-3.7594
RASA3	6	0.071125	0.07131	1	1416	0	-2.1881
SPANXA1	6	0.071479	0.071654	1	1417	0	-5.0766
GNG7	6	0.071786	0.071974	1	1418	0	-2.0741
ICAM4	6	0.071786	0.071974	1	1419	0	-2.6856
LPPR3	6	0.071786	0.071974	1	1420	0	-3.1624
hsa-mir-6750	4	0.071923	0.071763	1	1421	0	-3.2923
hsa-mir-922	4	0.071923	0.071763	1	1422	0	-3.6232
CA3	6	0.071951	0.072146	1	1423	0	-2.9504
F13B	6	0.071951	0.072146	1	1424	0	-2.307
DLX4	6	0.071951	0.072146	1	1425	0	-3.0944
GPR157	6	0.072046	0.072231	1	1426	0	-3.2995
LOC100287399	6	0.072093	0.072276	1	1427	0	-4.7314
RGPD4	5	0.072196	0.072288	1	1428	0	-2.7315
HMGA1	6	0.072211	0.072393	1	1429	0	-3.2923
EGF	6	0.072211	0.072393	1	1430	0	-2.6435
CD163	6	0.072211	0.072393	1	1431	0	-4.0539
SYN1	6	0.072211	0.072393	1	1432	0	-2.6421
BLOC1S6	6	0.072376	0.07255	1	1433	0	-2.6333
C14orf159	6	0.072423	0.072596	1	1434	0	-2.9161
hsa-mir-4273	4	0.07292	0.072752	1	1435	0	-1.8905
CDC14A	4	0.07292	0.072752	1	1436	0	-2.1999
hsa-mir-515-1	3	0.072961	0.072874	1	1437	0	-3.4066
hsa-mir-548a-3	4	0.073742	0.073535	1	1438	0	-3.0102
hsa-mir-8073	4	0.073853	0.073663	1	1439	0	-3.4528
hsa-mir-514a-2	1	0.074476	0.074503	1	1440	0	-5.0491
hsa-mir-4302	4	0.074833	0.074628	1	1441	0	-3.2595
hsa-mir-573	4	0.074833	0.074628	1	1442	0	-3.7021
TMSB15B	3	0.074834	0.074759	1	1443	0	-3.7049
DXO	2	0.075232	0.07508	1	1444	0	-2.081
ZNF559-ZNF177	2	0.075232	0.07508	1	1445	0	-3.1946
hsa-mir-6862-2	2	0.075232	0.07508	1	1446	0	-1.3432
B4GALNT3	6	0.07652	0.076695	1	1447	0	-3.0118
SPPL2C	6	0.07652	0.076695	1	1448	0	-2.018
RAB11A	6	0.07652	0.076695	1	1449	0	-2.1333
MXRA7	6	0.07652	0.076695	1	1450	0	-2.2347
SNX6	6	0.07652	0.076695	1	1451	0	-2.8681
SLC44A3	6	0.07652	0.076695	1	1452	0	-2.9326
OTC	6	0.07652	0.076695	1	1453	0	-3.5825
RPL14	6	0.07652	0.076695	1	1454	0	-2.054
RCE1	6	0.07652	0.076695	1	1455	0	-3.0766
NPRL2	6	0.07652	0.076695	1	1456	0	-2.5262
HORMAD2	6	0.07652	0.076695	1	1457	0	-2.7266
MAGEA2	6	0.07652	0.076695	1	1458	0	-3.847
KRT17	6	0.07652	0.076695	1	1459	0	-1.8709
HGS	6	0.07652	0.076695	1	1460	0	-3.8161
PDCD4	6	0.07652	0.076695	1	1461	0	-2.1999
FAM214A	6	0.07652	0.076695	1	1462	0	-2.4003
HUWE1	6	0.07652	0.076695	1	1463	0	-2.557
GLT1D1	6	0.07652	0.076695	1	1464	0	-2.9658
PRDM1	6	0.07652	0.076695	1	1465	0	-3.4946
FOXK2	6	0.07652	0.076695	1	1466	0	-2.589
PIPOX	6	0.07652	0.076695	1	1467	0	-2.3395
RPS3A	6	0.07652	0.076695	1	1468	0	-2.3393
LCE5A	6	0.07652	0.076695	1	1469	0	-2.424
OR4D2	6	0.07652	0.076695	1	1470	0	-3.2971
DPF2	6	0.07652	0.076695	1	1471	0	-2.0914
PYY	6	0.07652	0.076695	1	1472	0	-3.5154
SMC4	6	0.07652	0.076695	1	1473	0	-2.4677
SLC28A3	6	0.07652	0.076695	1	1474	0	-3.1741
SFT2D1	6	0.07652	0.076695	1	1475	0	-3.0219
NPY	6	0.07652	0.076695	1	1476	0	-1.9413
PTPRT	6	0.07652	0.076695	1	1477	0	-2.6333
MAGEB3	6	0.07652	0.076695	1	1478	0	-3.8037
TCEAL6	6	0.07652	0.076695	1	1479	0	-3.6007
NPRL3	6	0.07652	0.076695	1	1480	0	-3.4093
DPH3	6	0.07652	0.076695	1	1481	0	-3.2251
SPG11	6	0.07652	0.076695	1	1482	0	-2.8864
NPAS2	6	0.07652	0.076695	1	1483	0	-1.9608
PDE1A	6	0.07652	0.076695	1	1484	0	-2.8681
PSCA	6	0.07652	0.076695	1	1485	0	-3.0083
KXD1	6	0.07652	0.076695	1	1486	0	-3.2995
RBL2	6	0.07652	0.076695	1	1487	0	-1.4621
SLC25A19	6	0.07652	0.076695	1	1488	0	-2.7848
SLC16A9	6	0.07652	0.076695	1	1489	0	-3.4977
SSUH2	6	0.07652	0.076695	1	1490	0	-2.1999
DAGLA	6	0.07652	0.076695	1	1491	0	-2.8065
TMEM231	6	0.07652	0.076695	1	1492	0	-2.7055
RAB11FIP4	6	0.07652	0.076695	1	1493	0	-2.054
RPS27L	6	0.07652	0.076695	1	1494	0	-3.4062
AOC3	6	0.07652	0.076695	1	1495	0	-2.8315
CPT1C	6	0.07652	0.076695	1	1496	0	-2.5653
PINX1	6	0.07652	0.076695	1	1497	0	-2.6828
FOXD2	6	0.07652	0.076695	1	1498	0	-2.9658
ACOT6	6	0.07652	0.076695	1	1499	0	-2.5287
TMEM45A	6	0.07652	0.076695	1	1500	0	-3.0624
DCAKD	6	0.07652	0.076695	1	1501	0	-3.0814
TMX4	6	0.07652	0.076695	1	1502	0	-2.4829
KLF2	6	0.07652	0.076695	1	1503	0	-3.6532
TMEM209	6	0.07652	0.076695	1	1504	0	-2.5946
SLC29A1	6	0.07652	0.076695	1	1505	0	-2.4829
ROR2	6	0.07652	0.076695	1	1506	0	-3.0325
RPS11	6	0.07652	0.076695	1	1507	0	-0.85014
COL15A1	6	0.07652	0.076695	1	1508	0	-3.9859
SEH1L	6	0.07652	0.076695	1	1509	0	-1.5752
TM9SF4	6	0.07652	0.076695	1	1510	0	-2.8917
ZNFX1	6	0.07652	0.076695	1	1511	0	-3.2971
TBCEL	6	0.07652	0.076695	1	1512	0	-3.9068
RRAGA	6	0.07652	0.076695	1	1513	0	-3.2357
TMEM191C	6	0.07652	0.076695	1	1514	0	-3.151
IGSF10	6	0.07652	0.076695	1	1515	0	-2.9752
KLF5	6	0.07652	0.076695	1	1516	0	-3.1741
CHCHD7	6	0.07652	0.076695	1	1517	0	-2.1999
RAF1	6	0.07652	0.076695	1	1518	0	-2.8091
POU2F2	6	0.07652	0.076695	1	1519	0	-2.4495
TCP1	6	0.07652	0.076695	1	1520	0	-2.0474
ECT2	6	0.07652	0.076695	1	1521	0	-2.7973
TEK	6	0.07652	0.076695	1	1522	0	-2.8917
ZFP2	6	0.07652	0.076695	1	1523	0	-2.6241
SLC36A2	6	0.07652	0.076695	1	1524	0	-2.1545
CLEC10A	6	0.07652	0.076695	1	1525	0	-3.1685
ZNF502	6	0.07652	0.076695	1	1526	0	-3.3448
VCAN	6	0.07652	0.076695	1	1527	0	-3.029
ZNF778	6	0.07652	0.076695	1	1528	0	-2.0736
CNOT1	6	0.07652	0.076695	1	1529	0	-3.6007
GNA14	6	0.07652	0.076695	1	1530	0	-3.2667
CPLX3	6	0.07652	0.076695	1	1531	0	-2.9918
CAMSAP3	6	0.07652	0.076695	1	1532	0	-3.6414
CRYGA	6	0.07652	0.076695	1	1533	0	-2.307
CRYGC	6	0.07652	0.076695	1	1534	0	-2.1545
NETO2	6	0.07652	0.076695	1	1535	0	-2.2908
ZFX	6	0.07652	0.076695	1	1536	0	-3.6486
CTSK	6	0.07652	0.076695	1	1537	0	-2.3303
TNRC6B	6	0.07652	0.076695	1	1538	0	-2.6241
PSMA6	6	0.07652	0.076695	1	1539	0	-2.0741
ATP7B	6	0.07652	0.076695	1	1540	0	-3.0991
SGOL1	6	0.07652	0.076695	1	1541	0	-1.948
ENTPD1	6	0.07652	0.076695	1	1542	0	-2.7159
RPL37A	6	0.07652	0.076695	1	1543	0	-1.6951
L3MBTL1	6	0.07652	0.076695	1	1544	0	-3.4918
MT3	6	0.07652	0.076695	1	1545	0	-2.7266
FAM221A	6	0.07652	0.076695	1	1546	0	-3.2251
ZYG11B	6	0.07652	0.076695	1	1547	0	-3.8317
FBXL12	6	0.07652	0.076695	1	1548	0	-2.2477
BUD13	6	0.07652	0.076695	1	1549	0	-2.5262
RBP5	6	0.07652	0.076695	1	1550	0	-2.7071
CYP27A1	6	0.07652	0.076695	1	1551	0	-2.4495
KHK	6	0.07652	0.076695	1	1552	0	-2.9658
AJUBA	6	0.07652	0.076695	1	1553	0	-2.1999
HSPA13	6	0.07652	0.076695	1	1554	0	-2.7063
PPIL3	6	0.07652	0.076695	1	1555	0	-2.7159
CAMK2D	6	0.07652	0.076695	1	1556	0	-3.5991
SDR16C5	6	0.07652	0.076695	1	1557	0	-3.4104
TAF9	6	0.07652	0.076695	1	1558	0	-2.8571
HAUS1	6	0.07652	0.076695	1	1559	0	-2.557
ALDH18A1	6	0.07652	0.076695	1	1560	0	-2.7159
CHRNB3	6	0.07652	0.076695	1	1561	0	-3.3962
SMCO2	6	0.07652	0.076695	1	1562	0	-3.1742
CCDC152	6	0.07652	0.076695	1	1563	0	-1.9514
POU5F2	6	0.07652	0.076695	1	1564	0	-2.4329
DDX39A	6	0.07652	0.076695	1	1565	0	-2.181
HAP1	6	0.07652	0.076695	1	1566	0	-2.7899
MEPCE	6	0.07652	0.076695	1	1567	0	-3.3724
TUBD1	6	0.07652	0.076695	1	1568	0	-2.3117
TMEM185B	6	0.07652	0.076695	1	1569	0	-2.7872
CSF2RB	6	0.07652	0.076695	1	1570	0	-2.7979
FAM19A1	6	0.07652	0.076695	1	1571	0	-3.339
CHODL	6	0.07652	0.076695	1	1572	0	-1.945
MAMSTR	6	0.07652	0.076695	1	1573	0	-2.5262
EIF6	6	0.07652	0.076695	1	1574	0	-0.85014
DKK3	6	0.07652	0.076695	1	1575	0	-2.3303
KRTAP9-9	6	0.07652	0.076695	1	1576	0	-1.9215
PHF21A	6	0.07652	0.076695	1	1577	0	-2.9352
ILDR2	6	0.07652	0.076695	1	1578	0	-1.8892
C17orf85	6	0.07652	0.076695	1	1579	0	-2.5732
UCK1	6	0.07652	0.076695	1	1580	0	-2.7266
PHGDH	6	0.07652	0.076695	1	1581	0	-3.3265
SCN3B	6	0.07652	0.076695	1	1582	0	-3.4155
POTEG	4	0.076789	0.076547	1	1583	0	-4.2218
DLG2	5	0.077485	0.077611	1	1584	0	-3.0399
hsa-mir-639	4	0.077751	0.077515	1	1585	0	-1.6439
hsa-mir-3910-1	4	0.078507	0.078281	1	1586	0	-4.2946
ZNF813	3	0.078608	0.078565	1	1587	0	-1.7689
SPANXB1	5	0.079054	0.079151	1	1588	0	-4.9401
hsa-mir-4279	4	0.079058	0.078847	1	1589	0	-1.868
C7orf26	6	0.080601	0.080684	1	1590	0	-2.7159
KCNE1L	6	0.080601	0.080684	1	1591	0	-2.8091
SUSD4	6	0.080601	0.080684	1	1592	0	-2.7899
GBP3	6	0.080601	0.080684	1	1593	0	-2.8571
CAPNS1	6	0.080601	0.080684	1	1594	0	-2.533
TBC1D3	6	0.080742	0.080821	1	1595	0	-4.8791
hsa-mir-3609	4	0.081354	0.081217	1	1596	0	-3.0329
PRAMEF15	5	0.081442	0.081617	1	1597	0	-4.5994
LDOC1L	6	0.081818	0.081918	1	1598	0	-3.5643
ACKR2	6	0.081818	0.081918	1	1599	0	-4.0438
C1orf112	6	0.081818	0.081918	1	1600	0	-2.9009
EXO1	6	0.081818	0.081918	1	1601	0	-2.6358
GPR37L1	6	0.081818	0.081918	1	1602	0	-2.4329
SERPINA4	6	0.081818	0.081918	1	1603	0	-3.151
VPS37C	6	0.081818	0.081918	1	1604	0	-3.1225
M1AP	6	0.081818	0.081918	1	1605	0	-2.4003
ENPP3	6	0.081818	0.081918	1	1606	0	-3.121
ASXL1	6	0.081818	0.081918	1	1607	0	-3.1742
NLRP5	6	0.081818	0.081918	1	1608	0	-3.6443
ARHGEF35	6	0.081818	0.081918	1	1609	0	-2.0474
DCAF6	6	0.081818	0.081918	1	1610	0	-3.0832
NUP62	6	0.081818	0.081918	1	1611	0	-3.2357
DVL2	6	0.081818	0.081918	1	1612	0	-1.7278
ATP1A3	6	0.081818	0.081918	1	1613	0	-2.8091
C4orf40	6	0.081818	0.081918	1	1614	0	-3.0624
ZNF266	6	0.081818	0.081918	1	1615	0	-3.3537
HINFP	6	0.081818	0.081918	1	1616	0	-2.477
RTN1	6	0.081818	0.081918	1	1617	0	-3.2613
SOHLH1	6	0.081818	0.081918	1	1618	0	-2.7266
MAP7D2	6	0.081818	0.081918	1	1619	0	-2.6828
B3GALT2	6	0.081818	0.081918	1	1620	0	-2.957
GDE1	6	0.081818	0.081918	1	1621	0	-3.6532
HMCN1	6	0.081818	0.081918	1	1622	0	-3.0118
HIST1H2BN	6	0.081818	0.081918	1	1623	0	-3.8702
ADAMTS8	6	0.081818	0.081918	1	1624	0	-3.5847
ABCA10	6	0.081818	0.081918	1	1625	0	-3.0518
RNF144A	6	0.081818	0.081918	1	1626	0	-3.5154
DOCK6	6	0.081818	0.081918	1	1627	0	-2.8091
RBBP7	6	0.081818	0.081918	1	1628	0	-2.8571
HTR1F	6	0.081818	0.081918	1	1629	0	-3.0944
CCNYL1	6	0.081818	0.081918	1	1630	0	-2.533
SLC2A2	6	0.081818	0.081918	1	1631	0	-2.7635
TSKU	6	0.081818	0.081918	1	1632	0	-2.0474
HBEGF	6	0.081818	0.081918	1	1633	0	-3.4062
LAYN	6	0.081818	0.081918	1	1634	0	-2.8803
TMEM51	6	0.081818	0.081918	1	1635	0	-2.3303
AMOT	6	0.081818	0.081918	1	1636	0	-2.9658
OR4S2	6	0.081818	0.081918	1	1637	0	-2.8091
ANKRD20A2	1	0.08242	0.082439	1	1638	0	-4.9774
hsa-mir-4757	4	0.082688	0.082536	1	1639	0	-3.76
CARS	6	0.083057	0.083183	1	1640	0	-3.5643
C16orf74	6	0.083057	0.083183	1	1641	0	-2.0474
NPNT	6	0.083057	0.083183	1	1642	0	-4.1584
CCND2	6	0.083057	0.083183	1	1643	0	-3.0944
SMPX	6	0.083057	0.083183	1	1644	0	-3.7428
LCE3B	6	0.083057	0.083183	1	1645	0	-2.2477
HHIPL2	6	0.083057	0.083183	1	1646	0	-2.7159
TMEM132D	6	0.083267	0.083383	1	1647	0	-2.5652
hsa-mir-759	4	0.083379	0.083222	1	1648	0	-2.0474
SRGAP2B	4	0.083379	0.083222	1	1649	0	-3.3769
hsa-mir-676	4	0.083692	0.083551	1	1650	0	-2.5744
RHBDD2	6	0.083875	0.083978	1	1651	0	-4.0229
CLCA2	6	0.083875	0.083978	1	1652	0	-3.1095
WDR65	6	0.083875	0.083978	1	1653	0	-1.9902
C9orf156	6	0.083875	0.083978	1	1654	0	-3.9068
CHN2	6	0.083875	0.083978	1	1655	0	-3.1948
RNASET2	6	0.083875	0.083978	1	1656	0	-2.8114
GFRAL	6	0.083875	0.083978	1	1657	0	-3.2971
IKBKG	6	0.083875	0.083978	1	1658	0	-2.5946
IPO13	6	0.083875	0.083978	1	1659	0	-2.4677
RPL28	6	0.083875	0.083978	1	1660	0	-2.7159
AZIN1	6	0.083875	0.083978	1	1661	0	-2.8917
TP53AIP1	6	0.083875	0.083978	1	1662	0	-4.0051
CLIP4	6	0.083875	0.083978	1	1663	0	-4.1873
TMEM219	6	0.083875	0.083978	1	1664	0	-2.6687
FAM118B	6	0.083875	0.083978	1	1665	0	-2.7947
FGD3	6	0.083875	0.083978	1	1666	0	-2.1545
RHOXF1	6	0.083875	0.083978	1	1667	0	-2.5566
CACNA1C	6	0.083875	0.083978	1	1668	0	-2.1545
SULT1A2	6	0.084505	0.08461	1	1669	0	-3.6612
PRB3	6	0.084575	0.084686	1	1670	0	-3.0118
SLC12A4	6	0.084645	0.08476	1	1671	0	-2.1587
CX3CL1	6	0.084645	0.08476	1	1672	0	-3.7468
LOH12CR1	6	0.084831	0.084963	1	1673	0	-3.1685
TWISTNB	6	0.084831	0.084963	1	1674	0	-2.0152
hsa-mir-196a-2	4	0.084946	0.084783	1	1675	0	-3.107
PPIE	6	0.085204	0.085339	1	1676	0	-1.5752
TEPP	6	0.085204	0.085339	1	1677	0	-2.533
GLI1	6	0.085204	0.085339	1	1678	0	-2.0741
LCP2	6	0.085204	0.085339	1	1679	0	-2.6499
HAO2	6	0.085204	0.085339	1	1680	0	-3.2251
IZUMO4	6	0.085204	0.085339	1	1681	0	-2.2002
FCRL3	6	0.085204	0.085339	1	1682	0	-3.0944
DDX1	6	0.085204	0.085339	1	1683	0	-2.3959
VENTX	6	0.085204	0.085339	1	1684	0	-3.0118
MTNR1B	6	0.085204	0.085339	1	1685	0	-3.4062
RNF6	6	0.085508	0.085643	1	1686	0	-1.9807
UGT1A1	6	0.085554	0.085684	1	1687	0	-5.49
CENPT	6	0.085624	0.085748	1	1688	0	-3.0118
ZNF713	6	0.085624	0.085748	1	1689	0	-2.557
RPL41	4	0.085729	0.085521	1	1690	0	-1.9215
CALML5	6	0.085787	0.085912	1	1691	0	-3.2357
SLC25A52	6	0.085997	0.086123	1	1692	0	-2.8832
ZNF142	6	0.085997	0.086123	1	1693	0	-2.9695
XAGE1B	2	0.086003	0.085834	1	1694	0	-3.2473
PI3	6	0.08616	0.086301	1	1695	0	-2.4769
PALM2	6	0.086579	0.086714	1	1696	0	-3.9859
KLHL34	6	0.086579	0.086714	1	1697	0	-2.9752
DR1	6	0.086579	0.086714	1	1698	0	-2.8917
UGT2A3	6	0.086579	0.086714	1	1699	0	-3.0329
SPATA9	6	0.086579	0.086714	1	1700	0	-2.8116
UXS1	6	0.086579	0.086714	1	1701	0	-2.3258
RHOJ	6	0.086579	0.086714	1	1702	0	-2.6723
EPB42	6	0.086579	0.086714	1	1703	0	-3.1225
POU5F1	6	0.086579	0.086714	1	1704	0	-2.7159
ARHGEF12	6	0.086579	0.086714	1	1705	0	-2.3236
PCSK1N	6	0.086579	0.086714	1	1706	0	-3.2776
ZNF382	6	0.086579	0.086714	1	1707	0	-3.0329
FAM71F2	6	0.086579	0.086714	1	1708	0	-2.6756
ALDH2	6	0.086579	0.086714	1	1709	0	-3.5118
hsa-mir-4755	4	0.086652	0.086432	1	1710	0	-2.4209
ACTR3B	6	0.087045	0.087154	1	1711	0	-3.8984
ZNF177	6	0.087091	0.087204	1	1712	0	-4.3858
S100A16	6	0.087185	0.08729	1	1713	0	-3.1612
XAGE1A	6	0.087231	0.087342	1	1714	0	-4.5029
VCX3B	3	0.087319	0.087162	1	1715	0	-3.1742
THRA	6	0.087417	0.087539	1	1716	0	-2.7422
SOX12	6	0.087417	0.087539	1	1717	0	-2.0474
CLSTN1	6	0.087417	0.087539	1	1718	0	-3.5847
TRAPPC2L	6	0.08758	0.087698	1	1719	0	-3.1254
FPR2	6	0.08758	0.087698	1	1720	0	-3.16
PARPBP	6	0.087766	0.087881	1	1721	0	-3.0399
ZNF773	6	0.087766	0.087881	1	1722	0	-2.8815
RBMY1A1	6	0.087836	0.087954	1	1723	0	-4.7037
CTXN1	6	0.088162	0.088307	1	1724	0	-2.4044
ATP10D	6	0.088162	0.088307	1	1725	0	-3.7049
ARF4	6	0.088162	0.088307	1	1726	0	-2.7794
CGA	6	0.088162	0.088307	1	1727	0	-3.6556
KRTAP13-4	6	0.088162	0.088307	1	1728	0	-3.4104
CALM1	6	0.088162	0.088307	1	1729	0	-3.414
MFAP3L	6	0.088162	0.088307	1	1730	0	-3.1766
EIF2S3	6	0.088162	0.088307	1	1731	0	-2.533
PHIP	6	0.088162	0.088307	1	1732	0	-2.9504
TAS2R20	6	0.088162	0.088307	1	1733	0	-4.1901
PLVAP	6	0.088162	0.088307	1	1734	0	-2.9504
MYO1D	6	0.088162	0.088307	1	1735	0	-3.7512
hsa-mir-4800	4	0.088403	0.088197	1	1736	0	-3.107
RBM14-RBM4	4	0.088403	0.088197	1	1737	0	-3.6664
ALDH3A2	6	0.088534	0.088668	1	1738	0	-3.4062
PDE11A	6	0.08858	0.088717	1	1739	0	-2.8571
hsa-mir-512-1	4	0.088621	0.088416	1	1740	0	-4.6831
NAGK	6	0.08872	0.088846	1	1741	0	-2.7852
hsa-mir-516b-1	3	0.088996	0.088803	1	1742	0	-3.9494
NLGN4Y	6	0.089138	0.089254	1	1743	0	-3.501
IFNG	6	0.089138	0.089254	1	1744	0	-3.1699
IFNAR2	6	0.089138	0.089254	1	1745	0	-2.5432
PRICKLE2	6	0.089138	0.089254	1	1746	0	-2.75
RTTN	6	0.089138	0.089254	1	1747	0	-3.0766
SATB2	6	0.089138	0.089254	1	1748	0	-2.8571
SMDT1	6	0.089138	0.089254	1	1749	0	-1.9774
KRBOX4	6	0.089138	0.089254	1	1750	0	-2.8091
CEACAM8	6	0.089138	0.089254	1	1751	0	-3.0118
TCEANC2	6	0.089138	0.089254	1	1752	0	-2.7266
SACS	6	0.089138	0.089254	1	1753	0	-2.8024
ADAT1	6	0.089138	0.089254	1	1754	0	-3.4395
ECSCR	6	0.089138	0.089254	1	1755	0	-3.2437
GRHL3	6	0.089138	0.089254	1	1756	0	-3.5154
PTGES3L	6	0.089138	0.089254	1	1757	0	-3.0318
CDHR2	6	0.089556	0.089681	1	1758	0	-3.4205
CHI3L2	3	0.089562	0.089364	1	1759	0	-2.8917
AMER3	6	0.089719	0.08983	1	1760	0	-2.1999
CH25H	6	0.089719	0.08983	1	1761	0	-2.9206
KCNU1	6	0.089719	0.08983	1	1762	0	-3.2923
TOX3	6	0.089719	0.08983	1	1763	0	-3.8037
SCARA3	6	0.089719	0.08983	1	1764	0	-2.0832
POMT2	6	0.089719	0.08983	1	1765	0	-2.9752
CLRN3	6	0.089881	0.089992	1	1766	0	-2.9478
P2RY8_X	6	0.089928	0.090025	1	1767	0	-3.9212
CDH17	6	0.09002	0.090127	1	1768	0	-2.4888
YWHAZ	6	0.09009	0.090189	1	1769	0	-2.7266
APBB2	6	0.09009	0.090189	1	1770	0	-3.121
CSTB	6	0.090183	0.090293	1	1771	0	-3.5643
GABRR2	6	0.090299	0.09043	1	1772	0	-2.7065
CPE	6	0.090369	0.090502	1	1773	0	-2.9752
CST5	6	0.090369	0.090502	1	1774	0	-3.4629
TARS2	6	0.090438	0.090583	1	1775	0	-2.7159
C16orf78	6	0.090485	0.090627	1	1776	0	-2.6052
PNCK	6	0.09067	0.090816	1	1777	0	-2.2882
MOB1B	6	0.09067	0.090816	1	1778	0	-3.3448
LRIG1	6	0.09067	0.090816	1	1779	0	-2.4829
KDM4B	6	0.09067	0.090816	1	1780	0	-3.6591
MPI	6	0.09067	0.090816	1	1781	0	-3.4946
RAB31	6	0.09067	0.090816	1	1782	0	-3.2894
LOC100132247	6	0.090856	0.091006	1	1783	0	-3.3866
PPIAL4E	5	0.090905	0.091093	1	1784	0	-3.5154
hsa-mir-6079	4	0.091226	0.091017	1	1785	0	-3.124
HTN1	3	0.091424	0.091196	1	1786	0	-2.8917
URGCP	5	0.091642	0.091818	1	1787	0	-3.233
ZNF479	5	0.091894	0.092067	1	1788	0	-2.0741
QSER1	6	0.092247	0.092418	1	1789	0	-2.8832
DHX33	6	0.092247	0.092418	1	1790	0	-1.9215
COQ9	6	0.092247	0.092418	1	1791	0	-2.5262
SLC7A1	6	0.092247	0.092418	1	1792	0	-2.9504
SCRT1	6	0.092247	0.092418	1	1793	0	-2.7947
MRPL39	6	0.092247	0.092418	1	1794	0	-2.7071
SSH3	6	0.092247	0.092418	1	1795	0	-2.307
NEBL	6	0.092247	0.092418	1	1796	0	-2.1545
CREB3L1	6	0.092247	0.092418	1	1797	0	-2.6435
KRBA1	6	0.092247	0.092418	1	1798	0	-3.7021
SEMA6A	6	0.092247	0.092418	1	1799	0	-2.4003
SELENBP1	6	0.092247	0.092418	1	1800	0	-3.0399
GNG10	6	0.092247	0.092418	1	1801	0	-2.2868
LCE1B	6	0.092247	0.092418	1	1802	0	-3.0153
NSA2	6	0.092247	0.092418	1	1803	0	-1.9608
C7orf60	6	0.092247	0.092418	1	1804	0	-2.9504
DDIT4L	6	0.092247	0.092418	1	1805	0	-2.2107
RBM39	6	0.092247	0.092418	1	1806	0	-2.8571
RPS12	6	0.092247	0.092418	1	1807	0	-0.93658
MS4A6E	6	0.092247	0.092418	1	1808	0	-3.8317
GLI3	6	0.092247	0.092418	1	1809	0	-3.2357
CHIC1	6	0.092247	0.092418	1	1810	0	-3.0329
SMG5	6	0.092247	0.092418	1	1811	0	-1.7278
GRID1	6	0.092247	0.092418	1	1812	0	-3.151
KCTD20	6	0.092247	0.092418	1	1813	0	-3.5643
ZNF782	6	0.092247	0.092418	1	1814	0	-3.2357
ZNF623	6	0.092247	0.092418	1	1815	0	-2.8571
CEND1	6	0.092247	0.092418	1	1816	0	-3.2983
TMEM173	6	0.092247	0.092418	1	1817	0	-3.2228
NCAPG2	6	0.092247	0.092418	1	1818	0	-2.1545
C10orf137	6	0.092247	0.092418	1	1819	0	-2.9206
LEO1	6	0.092247	0.092418	1	1820	0	-2.7159
LOC440563	6	0.092247	0.092418	1	1821	0	-2.3303
CAPS2	6	0.092247	0.092418	1	1822	0	-2.6856
PARD6B	6	0.092247	0.092418	1	1823	0	-3.1479
SORCS2	6	0.092247	0.092418	1	1824	0	-2.8114
GPR89A	6	0.092247	0.092418	1	1825	0	-2.0767
MOK	6	0.092247	0.092418	1	1826	0	-3.538
ZNF660	6	0.092247	0.092418	1	1827	0	-2.7656
KIAA1432	6	0.092247	0.092418	1	1828	0	-2.4752
RAB22A	6	0.092247	0.092418	1	1829	0	-3.899
PER3	6	0.092247	0.092418	1	1830	0	-4.0856
C11orf70	6	0.092247	0.092418	1	1831	0	-2.6087
RNF114	6	0.092247	0.092418	1	1832	0	-2.054
EFHD1	6	0.092247	0.092418	1	1833	0	-2.7899
WBSCR27	6	0.092247	0.092418	1	1834	0	-3.0329
DHRS3	6	0.092247	0.092418	1	1835	0	-3.0153
GORAB	6	0.092247	0.092418	1	1836	0	-3.7886
OR6K6	6	0.092247	0.092418	1	1837	0	-3.1699
OBFC1	6	0.092247	0.092418	1	1838	0	-2.54
LRIF1	6	0.092247	0.092418	1	1839	0	-3.6147
OPN1MW	6	0.093636	0.09381	1	1840	0	-3.7695
TNIP2	6	0.093682	0.093856	1	1841	0	-3.6705
GPM6A	6	0.09389	0.094052	1	1842	0	-2.5208
CD38	6	0.09389	0.094052	1	1843	0	-3.2597
SLC22A9	6	0.09389	0.094052	1	1844	0	-2.8571
PGA3	6	0.094052	0.094215	1	1845	0	-4.1584
hsa-mir-411	4	0.09451	0.094331	1	1846	0	-3.0153
hsa-mir-4304	4	0.09451	0.094331	1	1847	0	-2.4595
hsa-mir-8063	4	0.09451	0.094331	1	1848	0	-2.4329
PAX6	6	0.094815	0.094978	1	1849	0	-2.9658
SIGLEC6	6	0.094815	0.094978	1	1850	0	-3.1195
SLC22A14	6	0.094815	0.094978	1	1851	0	-2.4329
MTRNR2L4	6	0.094815	0.094978	1	1852	0	-2.75
POU4F3	6	0.094815	0.094978	1	1853	0	-2.8065
EIF4B	6	0.094815	0.094978	1	1854	0	-2.5013
ITGA8	6	0.094815	0.094978	1	1855	0	-3.121
C19orf67	6	0.094815	0.094978	1	1856	0	-2.454
CYP4B1	6	0.094815	0.094978	1	1857	0	-2.7159
LMBR1	6	0.094815	0.094978	1	1858	0	-2.4188
KCNV1	6	0.094815	0.094978	1	1859	0	-3.2447
TACC2	6	0.094815	0.094978	1	1860	0	-2.1999
MCMDC2	6	0.094815	0.094978	1	1861	0	-3.2251
TMEM128	6	0.094815	0.094978	1	1862	0	-2.7244
RND1	6	0.094815	0.094978	1	1863	0	-1.7317
IGFL4	6	0.094815	0.094978	1	1864	0	-3.2357
LIFR	6	0.094815	0.094978	1	1865	0	-2.4716
EMILIN3	6	0.094815	0.094978	1	1866	0	-3.2035
OR7A17	6	0.094815	0.094978	1	1867	0	-2.307
C6orf201	6	0.094815	0.094978	1	1868	0	-2.54
TMEM95	6	0.094815	0.094978	1	1869	0	-2.5395
PHOSPHO1	6	0.094815	0.094978	1	1870	0	-3.3537
MSL2	6	0.094815	0.094978	1	1871	0	-3.6007
SLC38A1	6	0.094815	0.094978	1	1872	0	-3.4826
EHHADH	6	0.094815	0.094978	1	1873	0	-2.75
hsa-mir-548c	3	0.095306	0.095039	1	1874	0	-4.553
C4B	1	0.095441	0.095442	1	1875	0	-3.1791
ABLIM2	6	0.095578	0.095728	1	1876	0	-2.5262
ANKMY2	6	0.095578	0.095728	1	1877	0	-2.4741
SPATA6L	6	0.095578	0.095728	1	1878	0	-3.2923
MFSD3	6	0.095716	0.095867	1	1879	0	-3.2392
C11orf88	6	0.095762	0.095915	1	1880	0	-3.3537
C1QA	6	0.095809	0.095958	1	1881	0	-3.7813
LIMS3	6	0.095855	0.096005	1	1882	0	-4.4343
ENPEP	6	0.096016	0.096168	1	1883	0	-2.3692
UBE3C	6	0.096016	0.096168	1	1884	0	-3.0399
ADTRP	6	0.096016	0.096168	1	1885	0	-2.9504
PCOLCE2	6	0.096016	0.096168	1	1886	0	-2.2806
hsa-mir-4423	4	0.096079	0.095889	1	1887	0	-3.3951
hsa-mir-210	4	0.096079	0.095889	1	1888	0	-3.0399
NUDT17	6	0.096132	0.096286	1	1889	0	-3.7277
CT45A1	6	0.096201	0.096355	1	1890	0	-3.5825
PABPC1L2A	6	0.09627	0.096419	1	1891	0	-3.9561
RPS19	6	0.096386	0.096537	1	1892	0	-1.7689
CPA3	6	0.096386	0.096537	1	1893	0	-3.121
MEI1	6	0.096386	0.096537	1	1894	0	-3.1135
EPPIN	6	0.096386	0.096537	1	1895	0	-3.7347
hsa-mir-6715a	4	0.09642	0.096241	1	1896	0	-4.6096
hsa-mir-3689a	4	0.09642	0.096241	1	1897	0	-4.6764
GLB1L2	6	0.096524	0.096674	1	1898	0	-3.4795
SPATC1	6	0.096593	0.096758	1	1899	0	-3.0685
LARP1	6	0.096732	0.096892	1	1900	0	-3.1364
TMEM164	6	0.096732	0.096892	1	1901	0	-2.2025
AGXT2L2	6	0.096732	0.096892	1	1902	0	-3.9831
CLCN5	6	0.096824	0.096986	1	1903	0	-3.1766
CRISPLD1	6	0.09687	0.097036	1	1904	0	-3.3448
MLN	6	0.097078	0.097247	1	1905	0	-2.54
FRMPD1	6	0.097078	0.097247	1	1906	0	-3.4432
DPH7	6	0.097078	0.097247	1	1907	0	-2.9918
PRSS57	6	0.097078	0.097247	1	1908	0	-2.6856
TMEM259	6	0.097078	0.097247	1	1909	0	-3.0685
hsa-mir-514a-1	4	0.097102	0.096921	1	1910	0	-4.3289
OST4	5	0.097286	0.097473	1	1911	0	-2.8018
DUSP14	6	0.097631	0.097773	1	1912	0	-3.0058
MYO15A	6	0.097631	0.097773	1	1913	0	-3.4629
CARD6	6	0.097631	0.097773	1	1914	0	-3.2375
RGPD3	6	0.097631	0.097773	1	1915	0	-1.1659
HINT2	6	0.097631	0.097773	1	1916	0	-2.9658
GPR55	6	0.097631	0.097773	1	1917	0	-3.5201
SH3D21	6	0.097631	0.097773	1	1918	0	-2.557
FNBP4	6	0.097631	0.097773	1	1919	0	-3.495
SNRPE	6	0.097631	0.097773	1	1920	0	-2.0767
DAB2	6	0.097631	0.097773	1	1921	0	-2.2477
SULT1C4	6	0.097631	0.097773	1	1922	0	-2.4003
LRP11	6	0.097631	0.097773	1	1923	0	-3.6132
ARR3	6	0.097631	0.097773	1	1924	0	-3.3448
TSFM	6	0.097631	0.097773	1	1925	0	-3.16
CITED1	6	0.097631	0.097773	1	1926	0	-2.54
MAPK4	6	0.097631	0.097773	1	1927	0	-3.6946
GLMN	6	0.097631	0.097773	1	1928	0	-3.036
hsa-mir-3689b	3	0.097841	0.097549	1	1929	0	-3.2971
hsa-mir-631	4	0.097909	0.097695	1	1930	0	-3.2357
hsa-mir-6838	4	0.097909	0.097695	1	1931	0	-3.1927
FAM25A	6	0.098092	0.098245	1	1932	0	-3.1162
ZNF208	6	0.098092	0.098245	1	1933	0	-3.0867
ANK2	6	0.098207	0.098359	1	1934	0	-3.5667
C1orf151-NBL1	6	0.098207	0.098359	1	1935	0	-3.8682
ANKRD49	6	0.098207	0.098359	1	1936	0	-2.9504
OR4F16	6	0.098323	0.098478	1	1937	0	-4.8413
LYZL1	6	0.098392	0.098555	1	1938	0	-3.9415
PRR20A	6	0.098461	0.098624	1	1939	0	-4.2719
EIF3C	6	0.09853	0.098685	1	1940	0	-4.2826
CDY1	6	0.098576	0.09873	1	1941	0	-3.4073
SLC46A3	6	0.098691	0.098844	1	1942	0	-2.5135
PELI1	6	0.098691	0.098844	1	1943	0	-3.6946
RABGAP1L	6	0.098691	0.098844	1	1944	0	-2.5973
MSANTD4	6	0.098691	0.098844	1	1945	0	-2.4235
PSKH1	6	0.098852	0.099031	1	1946	0	-3.3217
PRKAB2	6	0.09899	0.099169	1	1947	0	-2.6087
PGK2	6	0.09899	0.099169	1	1948	0	-2.8114
OR10S1	6	0.09899	0.099169	1	1949	0	-2.9658
GNGT2	6	0.099106	0.099295	1	1950	0	-2.0741
KCTD5	6	0.099175	0.099364	1	1951	0	-3.6591
OPN1SW	6	0.099313	0.099503	1	1952	0	-3.8724
GABPB2	6	0.099313	0.099503	1	1953	0	-2.7159
NPTN	6	0.099313	0.099503	1	1954	0	-3.6132
TMEM79	6	0.099313	0.099503	1	1955	0	-3.2588
C5orf55	6	0.099313	0.099503	1	1956	0	-3.0118
ANXA8	6	0.099474	0.09968	1	1957	0	-4.0471
WNT3A	6	0.099474	0.09968	1	1958	0	-3.1423
ECHDC3	6	0.099635	0.099838	1	1959	0	-3.5154
PCDHA12	2	0.099677	0.099552	1	1960	0	-3.2612
TMEM208	6	0.099727	0.099929	1	1961	0	-2.2661
PSTPIP2	6	0.099727	0.099929	1	1962	0	-3.3937
DAPK1	6	0.099727	0.099929	1	1963	0	-2.2661
SNAPC4	6	0.099842	0.10005	1	1964	0	-2.6333
RGN	6	0.099842	0.10005	1	1965	0	-2.2191
RIPPLY1	6	0.099934	0.10014	1	1966	0	-3.4946
TMEM101	6	0.10003	0.10023	1	1967	0	-3.121
MSLN	6	0.10003	0.10023	1	1968	0	-2.6828
B2M	6	0.10016	0.10037	1	1969	0	-3.3724
ALDH1A1	6	0.10016	0.10037	1	1970	0	-3.5118
INPP4B	6	0.10028	0.10048	1	1971	0	-2.6103
CNTROB	6	0.10032	0.10054	1	1972	0	-3.0968
GTPBP5	6	0.10037	0.10058	1	1973	0	-4.3927
PYGB	6	0.10046	0.10067	1	1974	0	-2.9658
PADI3	6	0.10046	0.10067	1	1975	0	-3.8161
SLC5A5	6	0.10046	0.10067	1	1976	0	-3.3414
LOC100506422	6	0.10065	0.10083	1	1977	0	-2.7163
LIMD1	6	0.10065	0.10083	1	1978	0	-3.3086
PNPLA8	6	0.10065	0.10083	1	1979	0	-2.845
B4GALT2	6	0.10065	0.10083	1	1980	0	-2.9658
LCN2	6	0.10085	0.10103	1	1981	0	-3.2923
TPMT	6	0.10085	0.10103	1	1982	0	-3.1766
FAM72A	6	0.10092	0.1011	1	1983	0	-4.8391
TCHHL1	6	0.10097	0.10114	1	1984	0	-3.0399
HABP2	6	0.10166	0.10179	1	1985	0	-3.2059
INHBC	6	0.10166	0.10179	1	1986	0	-3.847
HOXD9	6	0.10166	0.10179	1	1987	0	-2.6087
TCP10L	6	0.10166	0.10179	1	1988	0	-3.4155
LY6G6F	6	0.10166	0.10179	1	1989	0	-3.4629
ANXA9	6	0.10166	0.10179	1	1990	0	-2.1711
ECE1	6	0.10166	0.10179	1	1991	0	-3.7164
NBPF4	6	0.10166	0.10179	1	1992	0	-3.5233
NENF	6	0.10166	0.10179	1	1993	0	-3.2983
PRR11	6	0.10166	0.10179	1	1994	0	-3.6101
ZNF587B	6	0.10166	0.10179	1	1995	0	-3.151
TSPEAR	6	0.10166	0.10179	1	1996	0	-3.4552
NDUFAF4	6	0.10166	0.10179	1	1997	0	-3.2089
ARHGEF7	6	0.10166	0.10179	1	1998	0	-2.4329
[truncated: 18,666 more rows]
