# Supplementary material for: Negative regulation of autophagy by UBA6-BIRC6–mediated ubiquitination of LC3
Source: eLife. 2019 Nov 6;8:e50034. doi: 10.7554/eLife.50034 (PMC6863627; doi:10.7554/eLife.50034)
Supplement: Supplementary file 3. [file elife-50034-supp3.xlsx]

## Sheet: Sheet1
Supplementary file 3. List of sgRNAs used in the secondary CRISPR library
gene_id	sgRNA sequence
AANAT	GTTTCGCTGCCTCACCCCGG
AANAT	GGGGACTCGGGGATCCCAGG
AANAT	GGCGCTGACAGCGTCCTCCG
AANAT	GTCCCTGGGCTGGTTCGAGG
AANAT	GTGGCGCCGCTGACAGCTCG
AANAT	CGGATCTCATCCAGGTACAG
AANAT	GACATAGGGTCAGGAAGTGC
AANAT	GGATCCCAGGTGGCAGACGT
AANAT	GACGCCCAAGACGGAGATGA
AANAT	GCCTTTGAGATCGAGCGTGA
AANAT	CGCGTCCTCGCACATGAGCG
AANAT	ACCTTCACGCTCGATCTCAA
AANAT	CCTTCATCATCGGCTCGCTC
AANAT	CCGGGCCGCGCTCATGTGCG
ACADM	AAGATGTGGATAACCAACGG
ACADM	AACGGGAGCCAACATGGCAG
ACADM	CAGAGAGGAAATCATCCCAG
ACADM	TGTGTAACAGAACCTGGAGC
ACADM	ATTGTGGAAGCAGATACCCC
ACADM	TGAAGCTACCAAGTATGCCC
ACADM	GGGGTTCAGACTGCTATTGA
ACADM	GTATTTGGGGAGAATGACTG
ACADM	GATACCCCAGGAATTCAGAT
ACADM	GATGCTGTGCAGATACTTGG
ACADM	GCCAATCGACAACGTGAACC
ACADM	TCCCCCTAATTAGAAGAGCC
ACADM	TGCTCGTAAATTTGCCAGAG
ACADM	ACTGTAGGAGGTCTTGGACT
ACADM	GAAAGCTTACCACAGTTCTC
ACAN	TGAGCTGCCCAGCTCTGGGG
ACAN	GTCGATGAAATAGCAGGGGA
ACAN	TGGGGCGGTAGAAGGGGCGG
ACAN	GATTCTTGGGGCCAGTGGGG
ACAN	GAAGGAGGTAGTGCTGCTGG
ACAN	GGCCTGCAGCTGCTCAGGCG
ACAN	GGCATGGACATGTGCAGCGC
ACAN	GTTGGGCCGGGCCTTGGAGA
ACAN	GTGACAAGGACAGCAGCCCA
ACAN	GGGTGACGATGGGGTAGCGG
ACAN	GCTACACCCTCGACTTTGAC
ACAN	GCGGGTCAACAGTGCCTATC
ACAN	CCCCAGAGTCATTGGAGCGC
ACAN	GCTGCGCCCTGTCAAAGTCG
ACAN	GAACTATGACCACTTTACTC
ACAN	CACGAAAACCCAGAGTAAAG
ACER3	GCAGTTCAGAGTGTTAGAGA
ACER3	GGATGTGAAGATAGGAACCA
ACER3	GAGATATAGGCCAAAAGTGA
ACER3	TAACCCAGTCCTCTAAGCCA
ACER3	GCGGACCGAGAGGGCTACTG
ACER3	GTGGTAATACCTATGATAGG
ACER3	TGAACTGCACCGAACATTGG
ACER3	CCAGTCCAGCGTGGAGGTCG
ACER3	TTAGAGACGGTCTGGAAAAG
ACER3	CCACACAATTTCATGCATGG
ACER3	CTCTGAACTGCACCGAACAT
ACER3	ATGATTATACCTCCAATGTT
ACER3	ACACAGGAACTTTCGAAAGA
ACER3	CCACCATGCATGAAATTGTG
ACER3	ATGCAACAGCTGTATATCAT
ACER3	TTTCATATTTCAGAGTCATG
ACOT1	GCTCCAGGTCCAGCTCGCCA
ACOT1	CTTGGAGCCCGAGAAACCCT
ACOT1	CATGTCCACAATGCCAGGAA
ACOT1	CTACTTGCTCAGTCATCCTG
ACOT1	GGTCTCGCCCTTGTAGCGTA
ACOT1	GCTCGCCAAGGGTGTCGGCG
ACOT1	GACATGTTCGGAACTGGAGG
ACOT1	GAGGTGAGTCACCTGGCGGC
ACOT1	GACGCTGATCCTGGAGCCCG
ACOT1	CCGGTTCGTCCCAGCAGCAG
ACOT1	AGTAGCGCTCGTGCCGCACC
ACOT1	CGCTACCGCGCCGACACCCT
ACOT1	TGGGGGAACCTTACGCTACA
ACOT1	CCGAACATGTCCACAATGCC
ACOT13	GCAATAGGCACTCTCCACGG
ACOT13	ACGTGGCTGTCAAACCGCCG
ACOT13	GCTCTGCTATGCACGGAAAG
ACOT13	GAAGAGCATACCAATGCAAT
ACOT13	GGAAGACACACAAAACACCT
ACOT13	CTTGTTGGTCAGATCCACAG
ACOT13	ACAGCACATGTTCTGAAGCA
ACOT13	AACACTTGCATTTACCTCTG
ACOT13	GGTGATAAAGGCCATGACCA
ACOT13	AAAATTGCGAGCCTTGGTCA
ACOT13	TCTCTCAAAATTGCGAGCCT
ACOT13	TGATATGTTATCTACTAACG
ACOT13	GTGGAGAGTGCCTATTGCAT
ACSL5	CAGGATGCAGATCAACGCCG
ACSL5	GCTTCCAGCTGATATCGCCA
ACSL5	GGGTGTGTCACAGATCACCA
ACSL5	AGAGCACTTCAGAAAACCTG
ACSL5	GAAGCCCACATTGTTTCCCG
ACSL5	GAAGAATGTCATGACTGAAG
ACSL5	TGAGAAGACACAGGAAGCCC
ACSL5	GTCATCCTTAGTAGGAGTGG
ACSL5	GGTGATCAGCCACAAGAAGA
ACSL5	CAAACATATGAGCCAGAGGG
ACSL5	CAGACACAGCGAGTCCTCTT
ACSL5	GTCAGGATGCAGATCAACGC
ACSL5	TTTAGACAATGGGCCCTGCT
ACSL5	CAAAGAGGACTCGCTGTGTC
ACSL5	AGAAGAGGTAAGACGGGTTG
ACSL5	TTTGTAAGATAGCCATCTGT
ACTL6B	GGCCAGCAGCCCCACTGTGG
ACTL6B	GCCCTGCACGTGCCTCGGGA
ACTL6B	GGAGCCTCGGACATGAGCAC
ACTL6B	CAGTGGAGCCACCCACACCA
ACTL6B	GAGATGAAGTCCCCTGCCAG
ACTL6B	GAAGAAGGAGAAGCTACCCC
ACTL6B	CGAGCGACTCCGCATCCCTG
ACTL6B	GGGAGTGTCATTGTCACCGG
ACTL6B	GTCTCCCCGCACAGATGAGG
ACTL6B	GGCTCCTTCTCAGTCCGCGC
ACTL6B	ACTATGAGCGGGGGCGTCTA
ACTL6B	ATGACCTCCGCTCCATCCCG
ACTL6B	GTCATGTCGCCCCTCAAGAA
ACTL6B	TCCCCGCACAGATGAGGTGG
ACTL6B	GCAGGGCATTGGTGTCGATG
ACTL8	GGACCGAAAGAAGATGCTGG
ACTL8	AGAACCGTTATCATTGACCA
ACTL8	GGGCCGCATCCTCAACTGGG
ACTL8	TCTCCAACACAAATGACCAG
ACTL8	GGTAGCTAAAGGTGTCAGGA
ACTL8	GAACCACAGACGGGAGCAAG
ACTL8	GACACCCTTGAGGGAGCCTG
ACTL8	TGTCTCCGTGATGATCACAG
ACTL8	CTACCGTGCAAGGAGAACCC
ACTL8	CACGCCTACGGGCATAGCTG
ACTL8	GAACTCCAGCGTCTTGCCGC
ACTL8	GATAACGGTTCTTGCAGCCA
ACTL8	GTGCTACGTGCCGCAGAATC
ACTL8	CACACGCCTACGGGCATAGC
ACTL8	ACGGATTCCACAATGGCCCG
ACTL8	CCGCTCGATGGGGTAGCTAA
ACY3	GGTCATGGTCCACGTAGCGG
ACY3	GCAGGTGCCCATGTTGGCCG
ACY3	TCAGCCCGCAGCACACCCTG
ACY3	GTCACAGCCACGCGACGCAG
ACY3	GAGAGCTGAACCAGCTGCTG
ACY3	GCCAGGTCTTCCTGTACCAG
ACY3	GATGGAAGCCTATAGACCCG
ACY3	GTTGGCCAGCACAGGCACAG
ACY3	GTAGCGGCGGCAGCCGGATG
ACY3	GGGGAAGTCCACGACGCCCA
ACY3	CTATAGACCCGTGGGCGTCG
ACY3	GGCAACGCCCTTCTCATAGT
ACY3	TCTTCCTGTACCAGCGGTCT
ACY3	GTCACCTCATATGGGTCGTC
ACY3	GGTGCATGGCAAAGACTTCG
AK2	GGGATGCATCGATGGCGGAG
AK2	AGGCTGATTCACCCCAAGAG
AK2	GAGTGTGGTAGGCTTGCAGG
AK2	GTCCCTTTACCGGCCCCGGG
AK2	TGCTTGCGAACACGACATCG
AK2	TTCCTGTTCTCAGATCACCG
AK2	GACTGTGAGGCAGGCAGAAA
AK2	CAAAGCCACATGTAAAGACT
AK2	GCATCCGGGCCGTGCTGCTG
AK2	TCATCTGATCGACGGATCAA
AK2	TTTACAGCTCGATGACCTCA
AK2	CTCTCTGTAGGCACCCAGAT
AK2	GCTCACCTGGGTCCCTTTAC
AK2	AATACCTTCCTGTGATTCTT
AK2	CTTCCAGGTGAGTGATGAAA
AK2	CCGGATGCCTTTAGGATACT
AK9	AAGAAAGAAGCCCAAAAGGA
AK9	AAAGGACGGAAAAGGAGAAG
AK9	GGTGGAAGCAGATAGGGACG
AK9	ACATATACAGTAGAGACCAG
AK9	AACCAAACTTCAGGGTGCAG
AK9	ATGGCATCCTGTGAAAGTGA
AK9	TATTGCCGAAATGCAGATGG
AK9	CCCGTTACATAACACAGGCA
AK9	CAATGACTTCAGGATCCCAC
AK9	TGAAACCGAATCAGGAGTTA
AK9	ATTAGCCCGTTACATAACAC
AK9	ATTGCTGCTGAAACCGAATC
AK9	TCCATGCCTGTGTTATGTAA
AK9	TCCCCAGAAGTCTGTCACTT
AK9	ACTTGTCATAAAGCTAATGT
AK9	GTTTACCATAACTCCTGATT
AKAP11	GCAGCACTGCCTGATCACAG
AKAP11	TCATAGGGAAGTCATCGCAG
AKAP11	TATGGTGACAAAACCAGTGC
AKAP11	GAGTTGTGTGGAGTAGAAGG
AKAP11	ACTATGCAGTGTAACAGCAG
AKAP11	TGAGCATGCCAATTTAACTG
AKAP11	GACATTCACTGAGGAAGTTG
AKAP11	GAGAATCCGGAGCATCACAC
AKAP11	TCCAAGAGGACTAAAAGCAG
AKAP11	AAGTCAAACGACCCACACTG
AKAP11	AAGCAGTGATCCTCTAAATC
AKAP11	CCAGTCTGTGTCATCCATAG
AKAP11	CACCTACATCACCAAGACTT
AKAP11	ACAAAAGTTACCTGATTTAG
AKAP11	CTCCTAAGTAAATATGCTAC
AKAP11	AGTGACAAAGTCATCCTCTA
AKAP3	GAGAGCACCAAAGAAAGACA
AKAP3	GCTGTGGAGATTCCTCAAGA
AKAP3	TGAGGGTCCCTGTGACGCTG
AKAP3	GTATTCTGAACCCAAATCAG
AKAP3	GAGGATATGGAGGAAGGCTG
AKAP3	GATTCATCGGGAGCTACAGG
AKAP3	GAAGTTGTGTGAAAGACCGT
AKAP3	GTGATTGCTGACAATCACCG
AKAP3	TCCTGGAGACAACCAAGCCC
AKAP3	GGAGATTATGCCAGAGAGGG
AKAP3	GTCGGTGCTGCGCTATGAGA
AKAP3	GAAGGCCGAAGTTAGCCTAC
AKAP3	GACTGGTTACAAAGCCAAAA
AKAP3	CAACTTTGCATACTCCATTT
AKAP3	TCCCCACCGCCTCATTCAGC
AKAP6	GGGTGAAGCATCAGTAGCCA
AKAP6	GCTCCGGATGACCTCAGAGA
AKAP6	AGAGCAACCAGGCTTAACAC
AKAP6	GATGTTGTCTGAGCCAACAG
AKAP6	GTGTCTGTGGAGGATGAGGA
AKAP6	AGATCCAGGACACAATGGCA
AKAP6	GAAATCAAGCAACGACGTCG
AKAP6	GGAGCAGGGTGAGGGAGAAG
AKAP6	GGGAGAACTCTGTTTCAAGG
AKAP6	GCTTGATTCTCTAACAGAAG
AKAP6	CCTGAGCTTATCCGAAGTGT
AKAP6	CCATTCCTAGTGACGTGACT
AKAP6	TTACTCTGTCAACGTGATAG
AKAP6	CCAGCACTGAGACTCGAAGC
AKAP6	GTGTCTCCAGATACAGTTTA
AKAP6	ACTGTATCTGGAGACACACT
AKR1B1	GAGCAGGAGACGGCTTGCCA
AKR1B1	GCAGGTGACTGAGGCCGTGA
AKR1B1	ATTGTAATGACAGCCTGGGA
AKR1B1	GTAGGCCATGGAAGAGCTGG
AKR1B1	CAAGATGCCCATCCTGGGGT
AKR1B1	CATGGGCACAGTCGATGTGG
AKR1B1	CAACTTCAACCATCTCCAGG
AKR1B1	GGGGCTCACTCACCTCAACA
AKR1B1	AGATCATCTCCACCTGGAGA
AKR1B1	GGAGGGTCTGTGCCTTGTTG
AKR1B1	TCAGGTCGCTGAGTGTCTTC
AKR1B1	TGGGCTCACAGGTCCTGATC
AKR1B1	TCCCATACCTTAAAGCCAGT
AKR1B1	CGCCCACGTGTCCAGAATGT
AKR1B1	GGAGCTCTTCATCGTCAGCA
AKR1B1	GACGTCAATGGCCACCTTCA
AKR1C4	TGGGTCCTCCAAAAGAACTG
AKR1C4	CCAAGAGCTACAATGAGCAG
AKR1C4	GAACCCAACGACATAAACTA
AKR1C4	ACAGATGGTCCAACCAGCCT
AKR1C4	GCGGATCAGAGAGAACATCC
AKR1C4	TCCGAGGAACAGAGCTGTAG
AKR1C4	GGGTGTCAAACTTCAACTGC
AKR1C4	CAGCGTGTAGAGCTAAATGA
AKR1C4	TGAATTCCAGTTGACATCAG
AKR1C4	TTTGCTAAGGCACAAAGAAC
AKR1C4	AAAAGTAATATTCGACACAG
AKR1C4	GCCAGCTTCTATTGCTAATT
AKR1C4	TTCCCTACCTTGAGAGCCAT
AKR1C4	CCAGGTCATGGAGAAGTGTA
AKR1C4	CACTTTCTTTCAACCACAGA
ALDH3A1	GCAGCGCCTGATCCAGGAGC
ALDH3A1	GAAGCTCCCTGAGTGGGCCG
ALDH3A1	GGGCCATGCACCTGCAGCGA
ALDH3A1	GGTGGGGAAGATCATCATGA
ALDH3A1	CAAGAACTGTGACCTGGACG
ALDH3A1	CAGGCTGCGCACGCACACGA
ALDH3A1	GCCTCACCAGGCAAGAGCGG
ALDH3A1	GGTCCTGCCCGAGCTGAAGG
ALDH3A1	GGATCCGGAACTGCAGCGGA
ALDH3A1	ATGGAACGCCTACTATGAGG
ALDH3A1	GTTCGACCATATCCTGTACA
ALDH3A1	AGTTCCAGGTGCCAATGACG
ALDH3A1	GGGACACCCCCATTGATTAC
ALDH3A1	CTACATCCACTCGGAGCCAC
ALDH3A1	TACCATCATCCCCCAGTACC
ALDH3A1	CATGTTCTCACTCAGCTCCG
AMY1A	GACTAGATGCAACAATGTTG
AMY1A	AATCAACGAGGACATGGCGC
AMY1A	TGGTCTTCTCGATCTTGCAC
AMY1A	TTCTAGGTAATTGATCTGGG
AMY1A	TGTGGTAATGCTGTGAGTGC
AMY1A	GTTGGGCCACCAAATGATAA
AMY1A	AACAGTAACTGGTTCCCGGA
AMY1A	CGTACCTCCTGGTAAATGAA
AMY1A	GAGCCTCTATACTTACCTTC
AMY1A	GAGCGATATTTAGCTCCCAA
AMY1A	GTGCATAATTTATAGCTAAC
AMY1A	TTCACAACCCTTTCAGACCT
AMY1A	TTAAAATCCCATCCAGAATA
AMY1A	TTTCTAGGTTCGTATTTATG
AMY1A	GTCAGAGATTGTCGTCTGTC
AMZ1	CAGGAAGAGCCGCTCGGCAG
AMZ1	ATGGACGCGGCTGCCACCGA
AMZ1	GCAGCACTGAACCATCCCCA
AMZ1	GCTGCAGTGTAGACCCGCAC
AMZ1	AGAGCGTCCTTCAAGGCCCG
AMZ1	CCGAGGCCTACAACCCGCAG
AMZ1	GGGCTTCCGGTGCTGCAGGG
AMZ1	CCAGCTGTGCAGCTGCACAG
AMZ1	ACGGCAGGCACTTGACGCGC
AMZ1	CGAGGAGCAGCGGATGGACG
AMZ1	GTCCCGTACCTATCGGCTGT
AMZ1	GCGCGTCAAGTGCCTGCCGT
AMZ1	GGAGCCAGTCGAAGCCCGTG
AMZ1	GTCTGACCTGTACCCCCATG
AMZ1	GGTACAGGTCAGACAGTGTG
ANKRD34B	GATGTCTATTTCTGAAGGAG
ANKRD34B	GCTCCAGGATATTACACCAG
ANKRD34B	GGGTAAGGCCAGCTGAGAGC
ANKRD34B	AGTGTTACCCAAACCAGACA
ANKRD34B	ATTAATGAGAGCAACGACCG
ANKRD34B	TAGAATGGTCTTGCAAGCTG
ANKRD34B	GTTTCCTCACAGGGGAACCT
ANKRD34B	CATGCAGTTTTAGAAAGGCG
ANKRD34B	GGAGCAAGGAAACAACTTCA
ANKRD34B	ACAACAGCAAAGTTGCCCTG
ANKRD34B	TTTAGTAGTATGCTTCCCAC
ANKRD34B	CAATGCCGATCCCAACATAC
ANKRD34B	GATCGGCATTGTTCTCTAAC
ANKRD34B	CTTCTAGCAAAAGTCTTGTG
ANKRD34B	TGACACCCATCTATATCCAC
AP3M2	TGAGGGGTAGGGATAACCGG
AP3M2	TGGACGCTTTGAAATAACGG
AP3M2	GGTGGGACCCAAGCAGACGA
AP3M2	TGAGTTTCTTCACCGAGTGG
AP3M2	GTTTGAAACGAACACAAGGA
AP3M2	CAATTACTGCTGAGATCCAG
AP3M2	TGAGCCTTACTCCATCACAG
AP3M2	GGCGCAAGAGAGAGCTACTG
AP3M2	TGTGGCCGTGATCCAGACGG
AP3M2	TGGTGTTGACAACCGTTCGA
AP3M2	TGCCTCAGGAAGCACGAATG
AP3M2	CTTGTGTTCGTTTCAAACGC
AP3M2	TTCACCCCAGTCCGTCGCCA
AP3M2	CAGCGTTTGAAACGAACACA
AP3M2	GATGCCTGTGTCAAGCTGAC
APLF	GGGGCTTCGAGCTGCAGCCG
APLF	GGGGAGACGGTGATCGGCCG
APLF	TCAGTACCAGCAATCAGTGG
APLF	ACATCAGCAGAACAAGACAC
APLF	CCCACACTTACTCCCAGCAG
APLF	GCCATTCTTGAGGTGGCAGG
APLF	ACTGGTGCCTCACAACTGGA
APLF	GATGACTCCCACAAATAGTG
APLF	CAGAGGGTATAGAGAGAATG
APLF	GGTAATGTAATCCAGGGAAG
APLF	TGGTCAGCTGCGAATCAAAC
APLF	TATAGACATAATACGCTTCC
APLF	TACCATTGAAGCCAAATCTA
APLF	CAGAAGACATGCCATTCTTG
APLF	CATCTAGAAAGCTGTCGTTC
APLF	GTCTATATTCTATCTTGTGC
AQPEP	GTGAAGGAAGACCTCAGGGA
AQPEP	GGGTCGCCAGTTGCTCGGGG
AQPEP	GGGCACTGGGAACGCCACAG
AQPEP	GAGCTGGCTCATCAAAACAA
AQPEP	AGAACTTTTCGCAAAATGGG
AQPEP	TGAGCTGCAGCAAAGACCCA
AQPEP	ACGGTGGGACGCGCTCGCAG
AQPEP	GTGAAGGGCAAAGACCCGGC
AQPEP	GATGTTCACGCGGCCAGTGA
AQPEP	ATGCAGCAGCAGTCGAGAGG
AQPEP	GTTCCAGCTGGGACGCTAAC
AQPEP	TATGTTGTCTCCCACGAGAT
AQPEP	ATGCCTGGTGTCCAATCTCG
AQPEP	GGCCCTGTTAGCGTCCCAGC
AQPEP	CCCTTTCTGTTCTGTTGACG
AQPEP	ACAAATGCGACTAAGTAAGT
ARHGAP36	AAGGCGGACAACAACAGCAA
ARHGAP36	TCAGTTCAAGATGCTTGCGG
ARHGAP36	GTCGGGGAAACGTGGTGCGA
ARHGAP36	GCGGTCGGGGTTGTGTCCTG
ARHGAP36	TCAGACGCTCCAGCTCAGAG
ARHGAP36	TGATTTTGAGAGGACAGCAG
ARHGAP36	GAATGAGCCCACCTTGCCCC
ARHGAP36	CAGCAAGCCTCAACAACCTG
ARHGAP36	GAGAGCAGATCCAAACACCA
ARHGAP36	AGAGTCCAGGAAAACAAAGC
ARHGAP36	TTTAACTCACTCGACGCCCA
ARHGAP36	GCCTGCGACTGAAAAAGCGC
ARHGAP36	CTCCGTGCAGCGAGTGCGTC
ARHGAP36	TACCTGACGCACTCGCTGCA
ARHGAP36	GATTGCGAAACAAATCCCCC
ARHGAP36	CCCAGAAGTCGTTGGCCAAT
ARRB2	AAGCTGGTGGTGTCTCGAGG
ARRB2	TCACGGTGAAGAAGAAGGGG
ARRB2	GAAGGAGGGTGCCAACAAGG
ARRB2	GTAGTGTGCTCACCTGACTG
ARRB2	ATAGCGGAAGGCGCAGGTGA
ARRB2	GATGAACAGGTCTTTGCGGA
ARRB2	TCAGCAGCCGGTCCTGCAGG
ARRB2	CCGAAAGGTGCAGTTCGCCC
ARRB2	CCAAAAGCTGTACTACCATG
ARRB2	ACGGAGCATGGAAGATTCTG
ARRB2	GCGGGACTTCGTAGATCACC
ARRB2	GACTACCTGAAGGACCGCAA
ARRB2	GAAGTCGAGCCCTAACTGCA
ARRB2	CAGTACCTTTGCGGTCCTTC
ARRB2	CCTGTTCATCGCCACCTACC
ARRB2	CCTGGTAGGTGGCGATGAAC
ASB12	GCAGCCCGACAAGGAGGAGG
ASB12	GGAGGAGGACACTGACACAG
ASB12	TGACTGACAGCAGTGAAAAG
ASB12	GAAGCTGGTGCCTCTCCTGG
ASB12	GTAGATGCTACCACCAGGAG
ASB12	GATGGAGGCAGATTTCAAGG
ASB12	CTGCAGGAGCTCCTAGACCA
ASB12	GGACACGAGCCAATAGGCCC
ASB12	GCATTGCTGCTACAGGCCCG
ASB12	AACGCTCCTGGCGCAAAAGC
ASB12	TGAAACGTTTGTAACGCTCC
ASB12	TGACAACGACTCCTATACTT
ASB12	AGGCTCTGCGGACGACTAAA
ASB12	TCCACGGTCACTTCTATCAC
ASB12	GTCTTGGGACACGAGCCAAT
ASB12	CACCAAAATCGATTAACAGC
ASB7	AGAGTTGCAGATTCAGGCCG
ASB7	GACATCCCCAGCAGCCACCG
ASB7	TGTGGCTGCCCACTACGGCA
ASB7	AGAGGGGCAGACACAAACTT
ASB7	ACGGAGCAGACACGAACACA
ASB7	GTGCGAAAGATGCTAGAACA
ASB7	GTGGTACCTTTATCACTGAG
ASB7	TGTTGGCATTGTGGTCCAGG
ASB7	TGTTACACCATCATTGTCGA
ASB7	CGGCTGGACTCCCCTCCATG
ASB7	CCGAATGGCCGAGATGCGAA
ASB7	GAGTCCAGCCATTCGCATCT
ASB7	CTAACATCAAGCGTGCAATG
ASB7	AGCTCGCCATTATCCGAGAG
ASB7	GTAGTTCATCAAGTAGCTTT
ASB7	TGATGAACTACCAATTGCCA
ASB9	CATGGATGGGAGCAAGCCCG
ASB9	CTGACACAAGCATTAAACAG
ASB9	TTAGGAGCGGACGTGAACCA
ASB9	GGTGCCTCCAGAGAGCCCCT
ASB9	GTGGGCTGTGAACATCATCA
ASB9	CAAGACAGGCTTCATGGAGT
ASB9	GGATTTTGGAGCGGACACCC
ASB9	ATGCATGAAGCTGCAATCCA
ASB9	AATAGAGTGGAGTGCCCAGG
ASB9	GGGAATCCTGACCTTTCCCT
ASB9	TATGACTCACCGCCCATCAA
ASB9	AAAAAGCTACCTGGCTGATG
ASB9	AGAGAGATGACCTCCAAGAC
ASB9	CAAGGGACTTTCCTGGCATC
ASB9	TGAATGGTGTGACAGCAGAC
ATF7IP	GAGTTGTATAAACCACCTGG
ATF7IP	AGAGGAGAGATCATCAGCAG
ATF7IP	TGAAAAGGACAACAAACCTG
ATF7IP	GGATGGCTCTGTAGAAGCTG
ATF7IP	GAAGAGAGTGGAGCTTCACA
ATF7IP	GTAAACAATGGACTAACCCT
ATF7IP	AGGAAGTAAAGCAGAATGGA
ATF7IP	AGAGGTGGGATCACCAGAGG
ATF7IP	AGAGGAGGGCTCGCTAGAGG
ATF7IP	AGAGGCAGCATCACTAGAGG
ATF7IP	TTCAAAGCGTTTGGTTAACC
ATF7IP	GCAATAATAACATGTCTTAC
ATF7IP	TGTTTCTTTAGGTTATACAG
ATF7IP	TGCTGTATTTGATAAGACTT
ATF7IP	CCCAACCCACCAGTATCACC
ATF7IP	AACAGTTCTCACTGAACTAC
ATG4C	AGCTTCTGAAGAAATCACCA
ATG4C	AGAGTCGGGATGTACAATAG
ATG4C	TCAGCTTTGACAACAGACTG
ATG4C	AATATTCAAAGCATCAGGCC
ATG4C	AGATTGGTATGGACCAGCTG
ATG4C	TTATCCACAGTACCTCAAGA
ATG4C	ATAGAGGATCACGTAATTGC
ATG4C	TGGGGCTGCACATTGAGAAC
ATG4C	GAGAACTGGCCAGATGCTCT
ATG4C	GAACTACTATAGCTTGGACC
ATG4C	ATTGTACATCCCGACTCTGC
ATG4C	TTGGTTTGGTGATTCCCCCT
ATG4C	AATTCTCCTGTATTATTGCT
ATG4C	ACTTACCTTCATATTTAAAA
ATG7	ATAGCTGGGCAGCAACGGGC
ATG7	GTATGATGAGAACATGGTGC
ATG7	AGCAACAACATACCACACCG
ATG7	GGAGCAAGCCCGCAGAGATG
ATG7	GGTCAGCAGATGCCACAGGG
ATG7	GAAGCTGAACGAGTATCGGC
ATG7	GCTGCCAGCTCGCTTAACAT
ATG7	TCCGTGACCGTACCATGCAG
ATG7	TGGGAAAAGAACCAGAAAGG
ATG7	GCCCAAGGCTCTGGCAGCAG
ATG7	AGAAGAAGCTGAACGAGTAT
ATG7	CTTGAAAGACTCGAGTGTGT
ATG7	GCCCGTTGCTGCCCAGCTAT
ATG7	TAGGGTCCATACATTCACTG
ATG7	GATACTCGTTCAGCTTCTTC
ATG7	GGTGAACCTCAGTGAATGTA
ATIC	GACATGTTTGAAAGAGGCAG
ATIC	GACCAGATTCAAACCAAGAG
ATIC	GCAGCTGGTGAAGGAACTCA
ATIC	AGTGTACTTGACAGCAATGG
ATIC	TGAACCAGAGGACTATGTGG
ATIC	GCAGTGTGTACAGCTGGGCA
ATIC	GTGCTACGCCAAGAACGGGC
ATIC	AAACCACGCTCGAGTGACAG
ATIC	CTGGCGTCTAGTCTCCAAGG
ATIC	GCGGCATATGCAAGAGCAAG
ATIC	TGTGCGATGCTTTGAACGCC
ATIC	TCTTGCATATGCCGCTGAGA
ATIC	TCGCACAAGTTTATAAATCC
ATIC	TTCTAACCAGGTGCTGCTGT
ATIC	TCTGATGGTATAATTGCCCC
ATIC	AAGGCTTCTTCTTCATATCC
ATP5J	GACGGCTGACCGAATGACAG
ATP5J	AGTATCAGCAAGAGCTGGAG
ATP5J	TTACTTAACAGGACATCTGG
ATP5J	CGTACCTTCAAATTTGAAGG
ATP5J	TTCAGAGTATCAGCAAGAGC
ATP5J	CCTCCGCAAATGGACTGAGA
ATP5J	CGGCCCATAATGCATTGCGA
ATP5J	CAGCCGTCTCAGTCCATTTG
ATP5J	GAACATTGGTGTTACAGCAG
ATP5J	GAATCAGCATGATTCTTCAG
ATP5J	TACTCTGAACTAGCATCAAC
ATP5J	AGACGTACCTTCAAATTTGA
ATP5J	TCCACAAAGAGTTTCTGTAT
ATP5J	TGAAGTCATCGAAAAACCCC
ATP5S	GTGGCGTAAAGAAACTCCCA
ATP5S	GGATGTTGGCCCTGACAGGG
ATP5S	GCTACCATGGCCAGGAGAGG
ATP5S	TCCGAGTGGTTGCTGCGCTG
ATP5S	CCAGAGGGCCTGTTGGAAGG
ATP5S	GCTCATGATACAAGAGTCGG
ATP5S	TATCTGGAGTCACATGACCA
ATP5S	CTGACAGGGCGGCATCCGAG
ATP5S	AAAATTTCCCAGCAGTTGTG
ATP5S	GAGCAGCGACTCACCTGTGC
ATP5S	GGGTGGATTATGATCGCATC
ATP5S	GTGCAAGTGTCATTATATCG
ATP5S	GGGGCCATGGTGCGCTACCA
ATP5S	CTAGATCAAATGATGCCGTT
ATP5S	TCATTGCTTTGCGTCATTTA
ATP5S	TCTTTACGCCACACAACTGC
ATP8A2	CCATCTGGAATACTTTGCCA
ATP8A2	GCTGGGCAAGGAAAATGACG
ATP8A2	CAAGCTGCTGACCTGTGCGA
ATP8A2	AAGATTCCCAGAGTGAAGGG
ATP8A2	GAGGATGAGGGAGTGGACCA
ATP8A2	GCGGTGCTGCGGGATAGCAA
ATP8A2	GGCGAGATGCTGAACGGCGC
ATP8A2	CAGCTGGTCTCCAACAGACG
ATP8A2	GTTGAGGTAAATGGTGCGGG
ATP8A2	GGCAGTGGGAGACATTGTGA
ATP8A2	GTCGAGGATCCGCTCGTCCG
ATP8A2	ACACGACACCAAACTCATGC
ATP8A2	GTGTACCTCTTAATAAGATC
ATP8A2	GCTCGGCGGGGGCCCTGTAC
ATP8A2	CATGAGACCTGTTCCAGTAC
ATXN3	CGAGTGTTAGAAGCAAATGA
ATXN3	AATGTTAGACGAAGATGAGG
ATXN3	AAGATGAGGAGGATTTGCAG
ATXN3	ATGAGGAAGCAGATCTCCGC
ATXN3	CCCAAGTGCTCCTGAACTGG
ATXN3	CTGGTGGCTGGCCTTTCACA
ATXN3	CAAGATATGACACAGACATC
ATXN3	TAGAGTCCATAAAACAGACC
ATXN3	TACTTAGCTGAATAGCCCTG
ATXN3	AGAGTTCACATCCATGTGAA
ATXN3	ATCCTCAATTGCACATCAGC
ATXN3	TCAACAGTCCAGAGTATCAG
ATXN3	ATCCTGAGCCTCTGATACTC
ATXN3	TGCCTGAATAACTTATTGCA
ATXN3	ACAGCAGCCTTCTGGAAATA
ATXN3	CTGTCATCCATATTTCCAGA
AUNIP	GCTGAAGAGGCGGAAAGTGC
AUNIP	CATGAGGCGGACAGGCCCCG
AUNIP	ACGCGGCGGCGCTGAAGAGG
AUNIP	ACTCCTTCCTGGAGAAAGAA
AUNIP	ACCTGGCTGCAAGGTGAAGA
AUNIP	GAAACACACCAAACTACCTG
AUNIP	TGTGGTGGCCAGAAGTCTGG
AUNIP	GCAGTGGTTGAAGTGGCTAA
AUNIP	GTATGTTTGAAGGAGGACAG
AUNIP	CTGAAGATTCTCAAGGCCAG
AUNIP	TCAGCGGCCATGAGGCGGAC
AUNIP	TTCTTGTTTGCTAGACCGAA
AUNIP	CGCGTCCAGCCACACGCCGC
AUNIP	GCCTGATTTGCTCTTTACCC
AUNIP	CAAAGAAGAGCTCCATCTAC
AUNIP	AAAATGCTAACACTCCTTCC
B4GALT3	GGTTACTGTAGACATCACGA
B4GALT3	GAATCCCCGGGTAGAACCAG
B4GALT3	GGGGCTCACAACCTGCAGGG
B4GALT3	GGTGGTAGAGCAGCAGGCGC
B4GALT3	GCTGCTGGCGCTGCAAGAAG
B4GALT3	GCAACATGGCGGGGTCCCCG
B4GALT3	GCAATGAGGAAAATCCCCAC
B4GALT3	GGCAGACCTTGAGGAGCTGG
B4GALT3	TATAAGATGGTGAAGCACCG
B4GALT3	GGGCTAAAGGACACCGACAC
B4GALT3	CAACATGGCGGGGTCCCCGG
B4GALT3	GCCGTTGCTATGAACAAGTT
B4GALT3	CTGAGACTCCTCCGAAGTAC
B4GALT3	TCATTGTGCCTCATCGTGCC
B4GALT3	AGGATGACGACATTGCTACC
BCKDHA	AGGGTCTGGCGGCTAAACCG
BCKDHA	GGGCAGCCTGGCTCAAACCA
BCKDHA	GCATCCTCTATGAGTCTCAG
BCKDHA	GGTGTTTGGCCAGTACCGGG
BCKDHA	GGTAGCGATCGCTGCAGCGA
BCKDHA	AGGCTGCCGCAGCAGCAGGA
BCKDHA	TGACAAGCCCCAGTTCCCAG
BCKDHA	CTTATCTATAAACTCCGCCG
BCKDHA	GGGGATTCCAGAGATGACGT
BCKDHA	CCAGATCATCAACCCCAGCG
BCKDHA	ACGTACCTGCCTCCCGGTAC
BCKDHA	TCTCACGTGGGGGTCCTCGC
BCKDHA	ATCGCCGCGATACTGCTCAG
BCKDHA	CGTCATCTGTTACTTCGGCG
BCKDHA	AATCCCCATCTACCGCGTCA
BCKDHA	CGCCAGATGCCTGTCCACTA
BCL11A	ACAGATGATGAACCAGACCA
BCL11A	GAGTGCAGAATATGCCCCGC
BCL11A	GGCACTGCCCACAGGTGAGG
BCL11A	GATAAACTTCTGCACTGGAG
BCL11A	GTGCAGAACGAGGGGAGGAG
BCL11A	GGCCCGTTGGGAGCTCCAGA
BCL11A	GTGCCAGATGAACTTCCCAT
BCL11A	CACAAACGGAAACAATGCAA
BCL11A	AAAAGCATCCAATCCCGTGG
BCL11A	AGAGCTCCATGTGCAGAACG
BCL11A	GATAAACAATCGTCATCCTC
BCL11A	GGATACCAACCCGCGGGGTC
BCL11A	TGTTTATCAACGTCATCTAG
BCL11A	ATCTACTTAGAAAGCGAACA
BCL11A	TCACAGATAAACTTCTGCAC
BDP1	GGAGACTCCCGTCCACGCTG
BDP1	GAGTCCGTGGCAGGATCCGG
BDP1	AACAGTACTGAAAAGACTGG
BDP1	AGAAGGACCCGCCTGAACAG
BDP1	ATAAGGCCTGAGCTAAAGGA
BDP1	AAGACTAGACACCTCACCAA
BDP1	CTGGAAATGAGAGTTCCCCA
BDP1	AAGAAGAGAAATATCCCCAG
BDP1	GCCACAGGAAAATGGCCCAG
BDP1	ACAGCTTCCAATCCCCAGCG
BDP1	TTAGCGTGAAGCCGAATGTC
BDP1	GATGTGCCCACAGTCGATTT
BDP1	ATTCGGTATCTGTCTGAGCA
BDP1	CACTGACACTAGACTTAACC
BDP1	ATGCTATAAATGAAAGTCAG
BDP1	TACGTCATTGGATTATTATC
BECN1	GAAACCAGGAGAGACCCAGG
BECN1	GGAAGAGACTAACTCAGGAG
BECN1	AAAGGAGCTGGCACTAGAGG
BECN1	AGTGGCAGAAAATCTCGAGA
BECN1	GAACCTCAGCCGAAGACTGA
BECN1	GAAGCTGTTGGCACTTTCTG
BECN1	CAGCTTCACTCTGATTGGGG
BECN1	CATGTCGGGCCAGACAGATG
BECN1	TCTGTGCATTCCTCACAGAG
BECN1	GATCCAGGAGCTGGAAGACG
BECN1	ATTTATTGAAACTCCTCGCC
BECN1	ATCTGCGAGAGACACCATCC
BECN1	CCTGGACCGTGTCACCATCC
BECN1	GCACACGAAGCTCACCTGCA
BECN1	TCCATTACTTACCACAGCCC
BECN1	CTGAGTTAGTCTCTTCCTCC
BET3L	ATCCACAGGGGTTACGGCAT
BET3L	TAACTCAGCTAGCCGCCCCG
BET3L	TTCCCATTACCATACGTGAA
BET3L	CAACCAGAGCTCCATAGGTA
BET3L	GGTTGCTTTCAAGATGTACC
BET3L	CACAGAGAAGATCGCCCAGC
BHLHE22	TCGGTGGCCGAGAGCAGCGG
BHLHE22	GAAGAGGTCGTCCTCGCCGG
BHLHE22	GAAGCAGCCCAGGGGCGACG
BHLHE22	GCCGTACTTGAGGCAAAGGG
BHLHE22	GGTGGCGCGAAGGCAGCCGA
BHLHE22	TCCAATGCCCACCTCCACGG
BHLHE22	GGTAGCAGCAGCGGTAGCAG
BHLHE22	GGTAGCGGTAGCGGCAGCGG
BHLHE22	GCCGGCTACCCGTTCAGCGC
BHLHE22	CAGGGACAGGTCCATGCCCG
BHLHE22	GCGACCGTCGCTGTCGTCGT
BHLHE22	TCCGGCGCTGAACGGGTAGC
BHLHE22	TGCTCGTAGGCGCCGAGCGC
BHLHE22	CTTGGAGAGCTTTCGCACCG
BHLHE22	ACATCAATGCCCGAGAGCGC
BHLHE22	GGCCCGCGGGTCGGCTACTC
BRE	TCTGGTATTCAAACATGAGG
BRE	GATATGAAAGGGGAGAGCAT
BRE	GACCACGCTAGATATGAAAG
BRE	GGAGGGCCACATCTTCTCCA
BRE	GAGGTGACAAGTACAGCTTG
BRE	AAACTGCACATACCATATGC
BRE	TCTCCAAAGATAAAATCGGG
BRE	AGTACTCACCTGCAAAGCTG
BRE	TGAGGCGGGAGCTCTCCCGG
BRE	AAGGATGTAAATGAAGACCC
BRE	CAGTTTAAATCGGTCACAGT
BRE	CTCCCCTTTCATATCTAGCG
BRE	ATTCGGTTCAAGGCCACTTC
BRE	GCCAGACCCCTCAGCTTTGC
BRF2	GCAACTGCAGAACTCGACAA
BRF2	GGCCAGGCTGCAAAAGAAGG
BRF2	GCATAACTGGCCCCTAACAA
BRF2	AGTTCTGCCAAGCACAGAGA
BRF2	GTAACATATTCCCGAAGCAC
BRF2	CTGTTGGTAGTAGGCAACCG
BRF2	CTGCGGCTGCGTGGTCACCG
BRF2	GCCCTCGTCGCTGAAGGTAG
BRF2	ACCAACATTTGAGGATACCG
BRF2	TCGGCACTCTGGCATCCGAG
BRF2	CGCGGTTGCCTACTACCAAC
BRF2	GAGATTGCCCTCGTCGCTGA
BRF2	TACCACTACCTTCAGCGACG
BRF2	ACAGTATTTGCGTACCCCTC
BRF2	GCTGTCTCGAACAATGCAGT
BRF2	AGGGACGTACCTGCTGCAAT
BSX	GGCGTGAGGAGCCAAGAGGG
BSX	AAACCGTGCGGGCTTTGCGG
BSX	GCCCAAGCCGCTGAGAGAGG
BSX	GGGTAGCCATAGTCTAGCAG
BSX	TGGTGGTCTCCCTTATGCAG
BSX	TGCGGGTGCGGGAACAGCGC
BSX	CGAGTCAGAGAAAACCGTGC
BSX	AGAACGAGTGGAGCTGGCCA
BSX	CCTGCGTCTCGGACAGGCTG
BSX	GTGGGCCTCTGAGAAGACGC
BSX	CGGGTGCCTCTGCTAGACTA
BSX	CTGGTGCTTTGGGTTCGTCT
BSX	CCGCCGCCGCAAAGCCCGCA
BSX	CCCGAAATCAGGTGAAAACG
BSX	CCTGTCCACGCCAGAACGAG
C10orf111	GGAGCAGCCACAGTGGACAC
C10orf111	TCGGAGTCGCTGCAAAGTCG
C10orf111	AGGATACAAAACCAACAGTG
C10orf111	GTCGGGGACAAGTGATGAAG
C10orf111	GCAGATACGTAAAGAGGAAA
C10orf111	ACAGTGAGGAGATTGAGAAA
C10orf111	TAAAAGGGAGAAGGAGTATG
C10orf111	ATGGAGACTCAGGCTACCAT
C10orf111	TGGGGTAAAACACATGCCTA
C10orf111	ATCCCGTCCAGTGTCCACTG
C10orf111	CATCGGAGTCGCTGCAAAGT
C10orf111	CGACTTTGCAGCGACTCCGA
C10orf111	TGGATCTGTTGATCTACCCT
C10orf111	GCTCCAAGCAATGGAGACTC
C10orf111	CCAAGTAAGGCCGGAAAAAG
C10orf111	TAGCCTGAGTCTCCATTGCT
C11orf84	GCTGAAATGCGAGGAAGGGG
C11orf84	GGAGGCCTGGAGTGAAGGGG
C11orf84	GGGCCGGCTCCTTTTAGGGA
C11orf84	CCAGGAAATAAGAAGCCCCG
C11orf84	GAGCCAGTCAGAAAGAAAAG
C11orf84	GGTGCTGCGAAAGTCTCCGT
C11orf84	GAGCTGCAAGACGAAGCCGG
C11orf84	GGACGAGGAGGAGGCCATGG
C11orf84	AGCGGGCTGGGTCTAGGCGG
C11orf84	GCAGCAGCCCAGGAGGCAGC
C11orf84	CACAGCTCGCTCGCACATCT
C11orf84	GCCTAGACCCAGCCCGCTAG
C11orf84	TGGTGCTGCGAAAGTCTCCG
C11orf84	GACTTTCGCAGCACCAGCCG
C11orf84	CAGCGTCTGGGTTGGCGTCT
C11orf84	TTGACTAACCAGGAAGCTCG
C12orf54	TAACCATCACTGAAACCCTG
C12orf54	AGAAGAGACAATGAGACCAC
C12orf54	TGACCTCCAAGCAGCAGAGA
C12orf54	ATGACATCAGCACCCAGGAC
C12orf54	ACAGCATCCCTGCCAGGATC
C12orf54	TAGGGACACTTACCCAGTCC
C12orf54	TTTTGTTCCTGATCCTGGCA
C12orf54	GGGGTCATCAAGGAATCTGG
C12orf54	TCTGGAGAGCAGCCATCAGG
C12orf54	AGAAGATTGCAGTTCAGCTC
C12orf54	CTGTACTCACCTGGTCCCAC
C12orf54	TGGTCTCATTGTCTCTTCTA
C14orf79	ACAGTCCCTTGAACTCCTCG
C14orf79	GAAGTGGTTCTCGGTGGCTG
C14orf79	GAGGCGCTGAGAAGTAGACG
C14orf79	GCTCCAAGATGCAAGGCCGG
C14orf79	GGGGTTCTGTGGGTCCCTCG
C14orf79	AGTTCTCACCAACCATGCCA
C14orf79	GCAGAAGTTCCTGTCACCCA
C14orf79	GAAAGAAGTTCTCCTGGCAA
C14orf79	GCCTTTGAGTGACCTCCAGG
C14orf79	GCCTCTCAGGTGCCACTCGG
C14orf79	TTATGTACACGTTCAACGCC
C14orf79	CGTCTACTTCTCAGCGCCTC
C14orf79	CTCCGCATGAGGGGGTCTTC
C14orf79	GGTCACAATCTTCCATGATG
C14orf79	TCCTTGGAATAGTGATGTGC
C14orf79	GTAACGAATCCAGAAAACTC
C16orf72	GTAGAGCTGGGCCACGGCGG
C16orf72	GTAGAGATTGGTGACGGCGG
C16orf72	GCGGAGGATGGAGGAGCGGA
C16orf72	GGAGCGGAAGGAGGAGGGCG
C16orf72	CGAGCTGCAGGAGGAGGCGG
C16orf72	AGCACAAGCAGCAGAAGCTG
C16orf72	GGAGCTCTAGAGTTTCGTGG
C16orf72	CTTGTGCTCGGGCTGCGCGG
C16orf72	CCAGAACTCGGCCACCGCCG
C16orf72	GGGACCCAGAGAGAAAGTCC
C16orf72	TGGCTATCAGCGACGCAATA
C16orf72	AGATCATTCTGTTGCGTTTA
C16orf72	CTGTAATGACATCGCCACAC
C16orf72	TAGTTTCCGTTGAAGTAGCT
C16orf72	GGGCAGCTGCTCGTCCTGTT
C16orf72	GCCGTCACCAATCTCTACAA
C17orf102	AGGGACATCAGTGACTGCGG
C17orf102	AACGCAGCTGAGGGAGGTGG
C17orf102	AAAACACCTCCGGCGCCCGG
C17orf102	TCTGGGGCTCAGCTTCGTGC
C17orf102	AGGAGCTGGGCACAGCAGCG
C17orf102	GGTTTCCCACAGCTGCGCCC
C17orf102	ACCCTGGAGAAACGCAGCTG
C17orf102	GGAGCGTGCATCCTTTGAAA
C17orf102	GAGCGGCTGCAAAACACCTC
C17orf102	CCAGTGCCCAGCGAACTCTG
C17orf102	ATTCGGGTCCCAGCGCTAGC
C17orf102	GACTGCGGTGGCGTCTACCC
C17orf102	GTGCATATCTCCAACATCAC
C17orf102	ACCTACAATGCCTGTGATGT
C17orf102	AGCCAGTGCCCAGCGAACTC
C18orf8	GCGGCCGGTGCAGTTCGAGA
C18orf8	AAAGTTTGCCCTGAACGTGG
C18orf8	ATCGAGCGGGAAGCACGGGG
C18orf8	ATCATTATCAGCGCAAGCCA
C18orf8	TCAGAGGACCTCAAAGACTG
C18orf8	GACCTCCAACAGCACAGGAG
C18orf8	CCAAAGGTTTGGAGTCGCTG
C18orf8	AGCGAAACCAGCGTTTGCGA
C18orf8	CAACTGCGTCTTCTTCGATG
C18orf8	CGTGCATCATCAGGATACAG
C18orf8	CAGCAAGATCACGGCGCTCT
C18orf8	TTCCGAAAGAGACATCGCAA
C18orf8	AGTTTCAGACTCCGTTTCTC
C18orf8	GCTACTGGCGTGGTAGTTAA
C18orf8	AGCCATTGCGATGTCTCTTT
C18orf8	ATAGGAATCCCATCTCATTT
C19orf57	TGACTAAGAGGAAGAAGCTG
C19orf57	CAAAACCCCTAAAGAACCCA
C19orf57	GGGCTGTTTACATCACCCTG
C19orf57	GTTTACAGAACTCATTCGGG
C19orf57	GACAGGGTTCCAGGTGACGG
C19orf57	GAAGGGGAGAAGCCAGACAG
C19orf57	GGAGGGGCCCAAAGGACAGC
C19orf57	GAGCTGATGCTGGGGTACAG
C19orf57	GAAGGGACTCATAGCAGCCT
C19orf57	GGGATGCTCCTCCCTCGGGA
C19orf57	CCTACATAGCTCCCCTGATG
C19orf57	GCTCCTCCGTCAACCAGAAA
C19orf57	GTGATGTAAACAGCCCAACA
C19orf57	CCATAGAAGTCTCCTAGCCT
C19orf57	GGGAAGATAAAATGACTAAG
C19orf57	AACCAGGAAAGGCCGTCTCC
C1GALT1C1	GAAAAGTGTCCTGAACAGGG
C1GALT1C1	GAAAATGCAGAAGATGCTGA
C1GALT1C1	GTAGGTGATGATGCTCATGG
C1GALT1C1	GAATATGTGGGTATGGAAGG
C1GALT1C1	TCATTGTCAGAACCATTTGG
C1GALT1C1	GGACACATTAGGATTGGTCA
C1GALT1C1	GGTCTCCAGATTTTATAGTG
C1GALT1C1	GGGCTGCAGTAAAGGAGACT
C1GALT1C1	GCAGTTTGCCTGAAATATGC
C1GALT1C1	TATGCCCAAATGCCCTAAGG
C1GALT1C1	GTATACCGCCTTAGGGCATT
C1GALT1C1	TGTGCTTTGATCACTATGCT
C1GALT1C1	AATGACTTATCACCCCAACC
C1GALT1C1	AGCCCAAAGACTCACATCTT
C1GALT1C1	ATCATCACATGCATCTGATT
C1GALT1C1	CAAATCATCCCTCCCTGTTC
C1orf86	GGCGCGGGCTTGGATGGAGG
C1orf86	GCAGCCGGTAGGAACGGCCC
C1orf86	GTGTTGCAGGAGCCCAGGTG
C1orf86	GCCCTGCAGGGATCAGGTGC
C1orf86	GCCGCGGCACCCTCCACAGA
C1orf86	ACGGCTGCTGCTCCACCCTG
C1orf86	GCACATGGGGCAGCTGCGCA
C1orf86	TTCCTGGACACCCTTTCCGC
C1orf86	GTGAAGACTTCAGTGGGCTC
C1orf86	TACCGGCTGCTTCACGGGGC
C1orf86	CGGCGGCTCAACCCCAGCCG
C1orf86	ACCTGGGGGCGAACTCCTTC
C1orf86	GTGAAGGCACCTCGTGATCC
C1orf86	CGCGGCTGGGGTTGAGCCGC
C1orf86	GGGGCCCGGGCCGTTCCTAC
C1orf86	AACCAGGGGCGGCCGCCAGA
C20orf197	ATAAGGGCTGTGCTGAAACA
C20orf197	CGGGCACAGCCACAGGCTGA
C20orf197	TATTGGCAGGCAGACGGCTA
C20orf197	CTGGACTCACCTTCAGCCTG
C20orf197	TGTCATGGGACAGTGTGGGA
C20orf197	CATGACACAAGACGCTCCAA
C20orf197	TTCCAAAACCTACTTGCCCG
C20orf197	TTATGGACTAAGGTGTCCCA
C20orf197	TTCTGCACCAAATAAACCCT
C20orf197	ATTGGATCAAGCCAATCCAA
C20orf197	CCATGACACAAGACGCTCCA
C20orf197	TAGCCGTCTGCCTGCCAATA
C20orf197	ACGGCTACGGGCACAGCCAC
C20orf197	CATTGGATCAAGCCAATCCA
C22orf31	GAGGAAGTGGTAGCTGGTGC
C22orf31	CCTGAGTACAAGCTTAACCA
C22orf31	GTCCATAGATAGGGATGCTG
C22orf31	GGCTCTCACCAACATCTGGA
C22orf31	GCAAGCAGCCAGCAGGGCAT
C22orf31	GCAGGGCATAGGAGGCCTGC
C22orf31	TCTCCAAACTTGCATGGTGG
C22orf31	AGTGATGAAAGCCACCCAGC
C22orf31	TGTTCTGGCCATCCAGATGT
C22orf31	TACAACTTCCCAAGAGGAAG
C22orf31	AACAGTCCGCCAAGATCTTG
C22orf31	GCCTGAGTACAAGCTTAACC
C22orf31	GCTCAGAGGGACCGGTTCCC
C22orf31	GTTCTGCTTTGCACATGTTC
C22orf31	CACTGTCCTGGGGTAGCGCT
C22orf31	TGCCACCCAAGCGCTACCCC
C3orf27	AGAGATGACGAGCTCAGGCA
C3orf27	GCTGTCACCAGAGAGCCCGA
C3orf27	GGAAGCGCTCCATCAGATAG
C3orf27	TGGAAACCAGCTCACTGCAG
C3orf27	TCTGGCACCAGAGACACTCG
C3orf27	ACAGTGGCACAGCAGAGTCC
C3orf27	GGGTGAGGAAAGGCCCACAG
C3orf27	CCAGAGCTTGATGTCTGGGA
C3orf27	AAAGTTGCTCAGAGGCTCTG
C3orf27	GAGTCTAGGCAGGCTCGTGC
C3orf27	CTAGAAGCTTCCAACCACCC
C3orf27	AGGCGGGAGACGCTGAGTCT
C3orf27	CCACCCACTACCATTTGACA
C3orf27	GTGGGTACAGGGCCCAAACT
C3orf27	GCTGTGTTCCTTGAAGCCGT
C4orf32	CTGCGGGATGTGCTCAGCCG
C4orf32	GCTCAGCCGGGGAGCTGCTG
C4orf32	GGCGGGGAACGCGACGAGGA
C4orf32	AGGGACCGGGTGGGATCCCG
C4orf32	GCGGCCGAAGGAGAGCGAGC
C4orf32	GAAGACTCACAGAACCACAC
C4orf32	AAGAACAGCAACTAGTCCAA
C4orf32	GTCCAAGGGCTTGCAGGCCA
C4orf32	AACCACACTGGTGAGCCGGT
C4orf32	TTATCAACATGGGCTTCACA
C4orf32	CGGGGAACGCGACGAGGACG
C4orf32	TTCTTGTAGTCATCTCCAAC
C4orf32	GGCTGCGGGATGTGCTCAGC
C4orf32	TTGTGAAGCCCATGTTGATA
C4orf32	GCGCCGCCGCGGGCTCGCCC
C6orf10	GACACTTCATATGATAACCG
C6orf10	GGTCCACCTTCAGCACCCCG
C6orf10	AGACTTCTGGACTATGAGGA
C6orf10	GCACTGTCTCGATCAAGTAT
C6orf10	TGGGCACGATGTAAGCAAAG
C6orf10	AAAGCACTTACCTAGAGAGT
C6orf10	GTACAATATCCTGGATCCAA
C6orf10	ATACTTACTTATGGGTGCCA
C6orf10	ATGGCATCTAAGTTCTCCCT
C6orf10	GGCAGCTTACCAATAGGTCC
C6orf10	TGGCAAGTCCCAGTAGAGTC
C6orf10	TCTACTGGGACTTGCCATCC
C6orf10	ACTTTGTTCTGAACTGTATC
C6orf10	TTTGTGTTGAATATGCATGT
C6orf10	CATGCATATTCAACACAAAG
C7	GATGTGGAGAAGATTTACGG
C7	AAGAGGATGTCCAACAGAGG
C7	GACAAGGCCGGCAATGACAG
C7	GAGCCACAGAGAAATGCTGA
C7	AAGGGGCATAGAAGTCCCAC
C7	GCTGTGTATGGGCAGTATGG
C7	CAGTCCTGTGAACCTACAAG
C7	GGTTTATCGATATCACAGGA
C7	TGTAGTCATACAGAGAGGGG
C7	ATTAGTCACAGATTCTGCCC
C7	AAGTCCCACTGGCAGTTGAC
C7	GCCCCTTGGTCAGAATGCAA
C7	GTCCTCACCTTGAAAAACTT
C7	GGTGATAAGCTTATTCATTT
C7	CCTCTCCAGTCAACTGCCAG
C7	CAGCCATTGCATTCTGACCA
C7orf25	GTAGATGTAGTTGCAAATGG
C7orf25	GCAGGTTCTACCTCAGCTGG
C7orf25	TGAACGAATCGCCATAGCCA
C7orf25	AGAAAAGGTGGCATAGAAGG
C7orf25	AAAGCTGTGCAGCAAATTGA
C7orf25	GCTGCTGGTGACTGGCCTGG
C7orf25	TGAGAGTGAATCAGATGATG
C7orf25	GTCAGAGCTGCAAACAACCA
C7orf25	TGAGGGTTGCTATACTGCAC
C7orf25	GAAATGGGCATATCTGTGAG
C7orf25	AACCGCGAGCGCGAGCACGC
C7orf25	TCGCGCGGGTGGAGCCGCCT
C7orf25	TGAGCGTGCCTTGAGACTAG
C7orf25	CCCACCCCGCTCGAACGCCG
C7orf25	TGAGATTTCCCGGCGGGTCC
CA5B	GTGACAGACTCGGAGAGGGG
CA5B	GGTGGTGATGAACAGCCTGA
CA5B	CTGGGGTTCTGAGCACACCG
CA5B	CAGCAAATGCTTCCCAGCAG
CA5B	GCCATTTTAGTGATCAAGGG
CA5B	CAAATGACCCAAATTCCACA
CA5B	AATCGGTAGTTGTGTTCCAG
CA5B	AAGCAGTTCCATTTTCACTG
CA5B	TGGGCAGGTAGGCATCAGGC
CA5B	GTAGGTCCAGTAATCTGGGC
CA5B	TTCCGAGATTCATGCCAGCG
CA5B	TGTACTCACAGGCTCGGTTC
CA5B	TTTGCCGTCAATTAAGCATA
CA5B	AGTACCTTATGCTTAATTGA
CA5B	TAGAATCTTCAAATTCCACG
CA5B	TTCTCCTAGTGCATCCACTC
CAAP1	AGAGAGAATAAGCAACCTGA
CAAP1	AATGGACTCTGATATGGAAG
CAAP1	ATGGAAGAGGAAGCAGATGA
CAAP1	GCAGATGATGGTTCTAAGAT
CAAP1	ACAGGAGCTCTAACTGTTCC
CAAP1	TGGTGGAGGAACAGCCAGGG
CAAP1	GAAGGTTGAACATCTTCTGG
CAAP1	GCTGCTAGAACTTGAGATGA
CAAP1	CGAACCCAAAGCAGCCACCC
CAAP1	CGAAGAAGCAGCTGCTCCCG
CAAP1	CAGCAGTGCTTCTGTATTAT
CAAP1	TGAAGTACCTTTAACACATC
CAAP1	TTTATAAGGTGACAATGGAA
CAAP1	AGAAATTAAAAAACTATGCC
CACNG3	GAGGATGGGGAAGACACTGG
CACNG3	GCAGCGTGACACTGAGGATG
CACNG3	GAATGACGTTGTGTCTGCTG
CACNG3	CAAGTGATAATGAAACCAGC
CACNG3	GTCACGCTGCTGTTCTTCGG
CACNG3	ATTATGAGGATGTGTGACAG
CACNG3	GTAGTCCGTGCCCACTGCAA
CACNG3	GACTACTGGTTATATTCCAG
CACNG3	TGACCCATTCGGGGCTGTGG
CACNG3	CGATTTTCTTGCACACGCCT
CACNG3	AGCGAGAACTTGACCGCCTC
CACNG3	GTTACGAGCCAAATCCCACT
CACNG3	CTACAGTGGTGATCAACATC
CACNG3	TGAAGATGCTGACTACGAAC
CACNG3	ACACAACGTCATTCTCAGCG
CALB2	AAGTACGACACAGACAGGAG
CALB2	TGGGAAAATCGAGATGGCAG
CALB2	ACGGATGTTTGACTTGAACG
CALB2	GAGAAGGCAAGGAAAGGCTC
CALB2	GCTTGGGCTCATCGTACGGC
CALB2	CTCCAGCGCCGAGTTTATGG
CALB2	TGGGCCTCTCAGAGATGTCC
CALB2	GGGCATGAAGCTGACCTCAG
CALB2	GATCGCGTTAAACTCCTCTG
CALB2	CTGCTGCTGCGGGCCAGCCA
CALB2	GGGCTCCAGCGCCGAGTTTA
CALB2	GCTGACGGCGTCCCAGTTCC
CALB2	TGGCCTCACCTCCATAAACT
CALB2	GGGACGCCGTCAGCTCGGCC
CALB2	GGCAAGGAAAGGCTCTGGCA
CALB2	ACAGGAAATGGGTATATTGA
CAMK2N2	GTAGGGCAGGATCTCGGACA
CAMK2N2	GCAGGCGGCAGCTGAAGGAG
CAMK2N2	CAGATCGGCCGAGCCAAGCG
CAMK2N2	GAAGACAAGATGGGCCGCTT
CAMK2N2	GAAGGAGAGGTCGGAGCCCT
CAMK2N2	GTTGCCCGCGAAGAAGGAGT
CAMK2N2	TCTTGTCTTCGCTGTAGGGC
CAMK2N2	CGCTTCGGCGCAGACCCCGA
CAMK2N2	GCCGCGTACCTCGCTTGGCT
CAMK2N2	GGCCGATCTGGCCCAGCTTG
CAMK2N2	CGGCGCGTCTACACTCCGGA
CAMK2N2	CCTTCAGCACGTCGTCTATC
CAMK2N2	CCTCGGGGTCTGCGCCGAAG
CAMK2N2	CCGGATAGACGACGTGCTGA
CAMK2N2	CTCCTTCTTCGCGGGCAACC
CAMTA1	GAGGAGGATGTGGCGCGCGG
CAMTA1	GCTGCCGAAAACAAGCCGGA
CAMTA1	GCACCGCTGGAACACTAATG
CAMTA1	GTTTCCCAAAGTGTATTCTG
CAMTA1	TACCAAAAGAGAGGCACCGC
CAMTA1	CACGGTGTTGAGAACACAGT
CAMTA1	CAAATCCTACCTTCTATAGG
CAMTA1	AACACCGTGCCACCTATAGA
CAMTA1	GGAGCCAGTAGCACCTCCGG
CAMTA1	GTGGTGGTTGGGGCCAGCGG
CAMTA1	AGGCTTGCCGCAGTCCTCGA
CAMTA1	CCTGAACGTGCCGGCCATCG
CAMTA1	TGGGACATTACCTTGTCTTA
CAMTA1	TAACCACCTCCCCTAAGACA
CAMTA1	CTACCTCATTAGTGTTCCAG
CAMTA1	GTTCAAGTTTACCAAAAGAG
CASC4	TGGGTTTCGGGGCCAACCGG
CASC4	GAAACAGATCGACCAGAAGG
CASC4	GCAGAACAAATCAAAAGAGG
CASC4	CTGAAGCAGGACGTGGCGGG
CASC4	GAAGAGATGCGAGGATGACA
CASC4	GATTCTGTTTTGAAGTACCG
CASC4	CCAGCACGAGAGAGGGCAGG
CASC4	GGAGATGCTCCAGTAGTTGA
CASC4	CAGCGCACCGAAGTGGCCCG
CASC4	CGTGCTGGTGGTGCTGCTGG
CASC4	GAACAACATATCGTATCAGA
CASC4	GCAACTTGCTGAGCTTCGTC
CASC4	TCAAGCAATCATATTCCACA
CASC4	CATCATTTGATTGAATCTTT
CASC4	CATATTCTAACCTCTTCACA
CASC4	ACAATAATACCTTTCCCATG
CASP12	GAGTCTGAAAGACAAACCCA
CASP12	ACAGATGAGAAACCATCCAA
CASP12	CATGTGGACCAGAACACCGT
CASP12	GAATCTGTGGGACCAAGCAC
CASP12	AAAGCCGGTGCAGATACTCA
CASP12	CTGAAGCCACTCACCAGCCA
CASP12	GGTGAGCAATGCTGAAAACC
CASP12	TGAAAACCTTGGATACTCAG
CASP12	GGAATGTGCTGTCTGAGGAC
CASP12	GCATCCTGAATGGAATCTGT
CASP12	GTAGATCTCGCATCCCCAAA
CASP12	AACTATCTTCATAATCGAAA
CASP12	CTGATCAAGACCTTTCTAGA
CASP12	ACAGATGAGATACACCTTAT
CASP12	CGAGATCTACTTGAAAACCT
CASP12	TCTCAGTGATATCATCAACC
CATSPER3	GGGGCAGACAGTCTACACCG
CATSPER3	GAAGAACGGCTACAACCTGC
CATSPER3	GCAGACGCTGATCACCGCCG
CATSPER3	GAAGAGCAGGAGGAGCACAG
CATSPER3	GATAAGCTTGAGGATGCGCA
CATSPER3	GGAGCAGCAGGAGATGCTCA
CATSPER3	GTTTGCCCATGAGCTGGCGG
CATSPER3	AAGCTTATCGGCTATAGCCA
CATSPER3	ACATGAGGAGGAAGAGCAGG
CATSPER3	GTACCGTGGCCAAGCTGAAG
CATSPER3	CGATAAGCTTGAGGATGCGC
CATSPER3	GCATGCCATCAGCGATATAC
CATSPER3	CATGTACATCTTCGCTATCT
CATSPER3	TATGTCATAACTGGTCCACA
CATSPER3	TGTGGACCAGTTATGACATA
CC2D1A	GCAGCTGCAGTTCTACACGG
CC2D1A	GAAGTGTCTAGCGGCAGCAG
CC2D1A	GTCTTGGAGGCCCTGAGCCG
CC2D1A	GGAGGCGCTGGAGCAGCGGA
CC2D1A	GCGGATGGAGCGGTACCAGG
CC2D1A	GCAGCCCAGGCCAAGAGCAA
CC2D1A	GAGTTCACCATAGCGCCGGG
CC2D1A	CAGGTTTGAAAAGTTGGCGG
CC2D1A	GCAGCCACCGTGGCTTCCGA
CC2D1A	CAAGGGCATCAAGTTCGAAG
CC2D1A	CCGATCGTAGCGCCGCATCT
CC2D1A	CCAAGATGCGGCGCTACGAT
CC2D1A	ACCGCCAGGTCCCTTGCCGA
CC2D1A	CCTGCAGGCGGAGCTAAATG
CC2D1A	CCAAACTGTACCTGGGCCAC
CC2D1A	GGAGGCTGATGATGACCTGC
CC2D2B	GTATTTTGGAAAGAAGGCAC
CC2D2B	CTAACACTGACGTTCCCAAG
CC2D2B	GTAGTTACGATTCTTCGGTT
CC2D2B	AAATCCACCTCAGCAACTTC
CC2D2B	CACTGTCTCAAGAGCTGTAG
CC2D2B	TGCTCTTCTGCAACAATCTG
CC2D2B	ATCAATGTATGGCATCTGGA
CC2D2B	GCTAAAGCAAATTCTGTCTG
CC2D2B	GACTCTGAAGAGTAAAGTGA
CC2D2B	GACCTAAACACCCAACACAT
CC2D2B	AAACAGTAGTTACGATTCTT
CC2D2B	AAGATACAAATCGAGCAATG
CC2D2B	CACTGCATCAGTTTAGCTAT
CC2D2B	CTTAGTCACAAGATATATCA
CCK	GGTGCCTCCCGCAGATCCCG
CCK	GTACCGCCATCAGCACGCAC
CCK	AGGGTATCGCAGAGAACGGA
CCK	GCTGGCAAGATACATCCAGC
CCK	GGGAGGCACCGGCTGCGTCA
CCK	GGCGCCCCGTAGGCAGCTGA
CCK	GGCGAGTCCCGAGCGCACCT
CCK	CTCGCTACAGCCATGAACAG
CCK	GTTCTGCAGGTTCTTAACGA
CCK	CATACTCCTCGGCACTGCGA
CCK	ATCTTGCCAGCAGGGCGCCC
CCK	ACGATGGACATTCGTCCAGA
CCK	CCATCCAGCCCATGTAGTCC
CCK	TGGCGAGTCCCGAGCGCACC
CCK	GGCTGGCGCCCTGACGCAGC
CCZ1	ACATCAACAAGAGGATGTCC
CCZ1	TCCAAGGCACATCGAACCTG
CCZ1	GAGGCCAGCACTGTGAGCTG
CCZ1	CTGAAAGCCATGGAAGACGG
CCZ1	TTGGAAAGAAGTCTGATCGG
CCZ1	TGGAATCAGCTTCTTCCCGT
CCZ1	AGATGAGGAGATCATTGTGA
CCZ1	TGGTACATTTCTGAAAGCCA
CCZ1	GTATTTGCAGTTAGCAGGAA
CCZ1	GCTGTGTGCTTTATGATCGA
CCZ1	AATGAGAAGATTAGAAATGT
CCZ1	AAGCTATTGTACAGTTTACA
CCZ1	TCCTCTTGATATTCAATAAC
CCZ1	ATTGAAAAACAGAGTAAAGA
CCZ1	GCAGGACAAGGTTTATAGCT
CCZ1	GCAGTGCTACAGCATGTACA
CCZ1B	GATGTGCCTTGGGAAAAGGG
CCZ1B	ACATCAACAAGAGGATGTCT
CCZ1B	GAGGCCAGCACTGTGAGCTG
CCZ1B	CTGAAAGCCATGGAAGACGG
CCZ1B	TTGGAAAGAAGTCTGATCGG
CCZ1B	TGGAATCAGCTTCTTCCCGT
CCZ1B	AGATGAGGAGATCATTGTGA
CCZ1B	TGGTACATTTCTGAAAGCCA
CCZ1B	GTATTTGCAGTTAGCAGGAA
CCZ1B	GCTGTGTGCTTTATGATCGA
CCZ1B	CCGGGGCGGGATGGCTGCAG
CCZ1B	CCGCATACCTGTCCTTCGCG
CCZ1B	ATTGAAAAACAGAGTAAAGA
CCZ1B	TCCTCTTGATATTCAATAAC
CCZ1B	GCAGGACAAGGTTTATAGCT
CCZ1B	GCAGTGCTACAGCATGTACA
CD164	GAGCACGCCCAGGCAGGTGG
CD164	ACAGCACGCAGAGCACGCCC
CD164	GCGCTGAGGACACGATGTCG
CD164	CCGGAGTGGTGACCAGCGGG
CD164	GCAGCTGTTTCGACCTTCAC
CD164	GGCGGCCCAAAGCAGTGAGC
CD164	CTCCAACGTAACCTCGGCGC
CD164	AACTCCCCAGAAACCTGTGA
CD164	CAGTTAGTGATTGTCAAGTG
CD164	GCGCTAAAGTCGTCACGTTC
CD164	GTGCCAACAGCCAATTCTAC
CD164	AACACGACAGACTTCTGTTC
CD164	TCCAAGACAGTTACTACATC
CD164	AACAGTTAGTGATTGTCAAG
CD164	ACCTGATGTAGTAACTGTCT
CDC40	ACAGGAAGAAGAGAAACCTG
CDC40	CAAGTGCATGAGGGAGTCGG
CDC40	TGGATGAAATCACAGCAAAG
CDC40	GCAGCTCTGGCCGCTTCCTA
CDC40	GGACCCTGAACCCGAACCAT
CDC40	AGGGAGTCGGCGGCTGGCAG
CDC40	GCCGTCTCTAGCAGTGGCAG
CDC40	AGATTAACACCAACATCCTG
CDC40	GCAGTGACTTTGTCTCCAAA
CDC40	AGTGGACTCGGCTCCGGAGG
CDC40	TTGGACCAGAAAATCCCTTT
CDC40	AGCCATTTGCTGTGTCCTAA
CDC40	TGAGACCATGTTTGCTCCTG
CDC40	ACTTGATGATTATCTAATGA
CDC40	ATTATACTGAACTTCTTTGA
CDC40	CAAGTGTCTGCTAAATATAT
CDC42	GGAGTGTTCTGCACTTACAC
CDC42	CTTTTGGGTTGAGTTTCCGG
CDC42	CAGAACCGAAGAAGAGCCGC
CDC42	TGAGTCCCAACAAGCAAGAA
CDC42	AGAAAGGAGTCTTTGGACAG
CDC42	ACAGTCGGTACATATTCCGA
CDC42	AAAGCTGGCCCGTGACCTGA
CDC42	AAGTGTGTTGTTGTGGGCGA
CDC42	ACTTGACAGCCTTCAGGTCA
CDC42	GCAGTCACAGTTATGATTGG
CDC42	ATTTGAAAACGTGAAAGAAA
CDC42	GACAATTAAGTGTGTTGTTG
CDC42	TCAAAAAGTCCAAGAGTATA
CDC42	TATGCAGTCACAGTTATGAT
CDC42	ACTAGAAATACATCTGTTTG
CDH23	GACCAAGTCAGAGTTCACCG
CDH23	GGATGAGGGCCTCAACGGGG
CDH23	GCAGGTATGTATCAAAGAAG
CDH23	CCAGACACGCCAAACACCAG
CDH23	GGCCTCTCGCTTCTTTGCAG
CDH23	GATGATGGCCAAGTTGGCCA
CDH23	ATGGTGTAGCCAATGCCCCG
CDH23	TCGGGGAGATGATGAAGTGG
CDH23	TGAGAGAGTGACCTCATAGG
CDH23	GGATCACCTACTACATGGAG
CDH23	TTCGCCATTGACAGCGCCCG
CDH23	GATACCGCGGGCGCTGTCAA
CDH23	GTTCTCTGTCAGCGACCACC
CDH23	CCATGTCTTGGGCCAGCAAC
CDH23	CCCCAGACACGCCAAACACC
CDH23	GTCGCTGACAGAGAACTCCA
CDHR1	GCGGCCACTCACCCAAGCAG
CDHR1	GAGACATGAGGCGCTGCCGG
CDHR1	GCAGAGGCGCAGCAGCCCCA
CDHR1	GGAGGCGCAGCACACCGCTG
CDHR1	CCGGACCCACTACATCACCG
CDHR1	GGGTGTGCCCACGAAGACAG
CDHR1	GAATCCTGGCAACGTAGTAG
CDHR1	GGATTCCTGAGAACGCCCCA
CDHR1	GGCTTATCTACACCCAGCCC
CDHR1	AGAGGAACCCAACAACCTGG
CDHR1	GGCCGAAAAAGTCGTGATCC
CDHR1	ATGCCAATGATGAGGCGCCC
CDHR1	TCTCACGTATACACCCTGAA
CDHR1	AGAAAAGACGCTTCTAGTGC
CDHR1	GCCATCATCAGCATTTCTGA
CDHR1	GCCATCAGAAATGCTGATGA
CDK5	GCCCCAAAGAGGACATCCGG
CDK5	GGACGCCCACCGAGGAGCAG
CDK5	ACAGCGGACGGGAATCCCAA
CDK5	ACTCCGTGGACACACTGCTG
CDK5	GAGGCTGGATGACGATGATG
CDK5	CGTCCGCTGTTACTCAGCTG
CDK5	CCGGGAGACTCATGAGATCG
CDK5	CAGAGCTGGCCAATGCTGGG
CDK5	TAGGCAGATCTCCCGGAGGG
CDK5	GGCCTTGAACACAGTTCCGT
CDK5	GTGTGCCGAGTTCCGCCCTC
CDK5	ATCTCCCGGAGGGCGGAACT
CDK5	CCACGATCTCATGAGTCTCC
CDK5	CAGCGACAAGAAGCTGACTT
CDK5	TCAGCTTCTTGTCGCTGTGC
CDK9	GGTGCTGATGGAAAACGAGA
CDK9	GGTATATACTACCCTTGCAG
CDK9	AATGTGCTTATCACTCGTGA
CDK9	GAAGCTGGCAGACTTTGGGC
CDK9	CGAGTCGTACTGCTTTGCCA
CDK9	GGTTGGTGTAGCGGTTGGGC
CDK9	GGTGCATCATGGCAGAGATG
CDK9	AAGCTCGCCAAGATCGGCCA
CDK9	GCACCGCAAGACCGGCCAGA
CDK9	CCAGAGTGTCACCACACGGT
CDK9	CAACCGCTACACCAACCGTG
CDK9	ATTGAGATTTGTCGAACCAA
CDK9	GCTCGCAGAAGTCGAACACC
CDK9	ACTACCCTTGCAGCGGTTAT
CDK9	GACACTCTGGTACCGGCCCC
CENPI	GCCGTGAAGCAAAGAAACCG
CENPI	AAAGAGAGTTAAGAACGTCC
CENPI	ACATGGACAAAACAATCCAG
CENPI	GAGATGAGCCAGTCTTGCTG
CENPI	GGAACTGTGACCGACAACAA
CENPI	AGATGCTTTGCAAATGGCAG
CENPI	GGAGGAAACAATACCACTAA
CENPI	GCAGAATAGAAGATCCCAGG
CENPI	ACACTTGCCAACACAAAGCC
CENPI	TAGCTACTGGAATTGAGCAC
CENPI	TTCATTGCAAGATGATGCAC
CENPI	GTTTGACTTCATTGATCGTA
CENPI	CAAGTGTTCTGGTAGCACCA
CENPI	CTATTAAATATTGCACTCAG
CENPI	CTTGAAAACTGTGGAAAATG
CGB7	CCAGGGAGATGCTTCGGCCA
CGB7	GGGCATCCAGGGAGATGCTT
CGB7	TGGGCGGGACATGGGCATCC
CGB7	AGGGGCCTTTGAGGAAGAGG
CGB7	GAAGAGGAGGCCTGGAAGCG
CGB7	GGGAGGATCGGGGTGTCTGA
CGB7	ATCGGGGTGTCTGAGGGCCC
CGB7	TGTCTGAGGGCCCCGGGAGT
CGB7	CAAGTCCATCCCGACTCCCG
CGB7	CGGGATGGACTTGGAAGGCT
CGB7	ACCAAGGATGGAGATGTTCC
CGB7	GCTGTTGCTGCTGCTGAGCA
CGB7	CTTCCAGACCCGCGTGCTGC
CGB7	TGAGAAGCCTTTATTGTGGG
CGB7	CACCATGGTGGGGCAGTAGC
CHST8	GCAGGCTGATGAAGAGGAGG
CHST8	CAGGATGGAAGAGAACATGC
CHST8	GACTCACCTGGCACCTGCTG
CHST8	TAAAGTTCAACATCAGGCCA
CHST8	GCGACCTGGAACAATGCGGC
CHST8	TGCAGCTCCGAACAGCAGGA
CHST8	CGAGCTCCGTAGGGTCCTGC
CHST8	AGACGGGTTCCCCTCTGCAG
CHST8	CCTCGCAGTAGAGCACGCGG
CHST8	GTTGTGCTGGATGTCGGCAG
CHST8	GGCGGTCCTCCACGAAGATA
CHST8	CCACGTGTCCCGTATCTTCG
CHST8	CCCCGGATGACCCTGCGACC
CHST8	CTTACGTGGTGGGGCTGCCT
CHST8	CAGGAATAAAGTTCAACATC
CIB1	GCAGCTCACAAAACCGCCTG
CIB1	GGTGAACTGCCTCACGGGAG
CIB1	AAGGCTGAGAATCTGCTCGA
CIB1	GTTCTCACCAAAGATGCGGA
CIB1	GGAGGAGTCTGACATTGACA
CIB1	GAGAACGGGAGATGACGTGC
CIB1	GATTCGCTCCTTGAAGGGGT
CIB1	GCTAAGGCTGTCTTTGGCTG
CIB1	CCAGGAAGTCCTCAAAGCTA
CIB1	AGCTGCTTCCCCAGGAGCAG
CIB1	CTTGACGTTCCTGACGAAGC
CIB1	CATTATGCCTTCCGCATCTT
CIB1	CTGTCATACCTGGCAAAGTC
CIRH1A	CTAACAGCAGTGAGAAGCAG
CIRH1A	GGTTATTGTAAGCCACACAG
CIRH1A	GGACAGCGACTCTTTAGTGC
CIRH1A	GCTCCAAATAGGTCCTCCAA
CIRH1A	GCTCTTCACAAGCGTCCCAG
CIRH1A	GCAAGAAGACAGTTTCGTGG
CIRH1A	CCAACAGCGCTGATATCTGG
CIRH1A	AAATCTGAAGGGCAGAGCGA
CIRH1A	GCCACACAGCGGATTCCTGA
CIRH1A	GCTGCAATGTGGGTACCAGA
CIRH1A	GGTGTCGCCTTCTTGTCCGA
CIRH1A	CGTCAGCATTAGCGATGAGA
CIRH1A	GTAGCCCGAGACTCATGACC
CIRH1A	CTGGGATCCACAGTTGCAAC
CIRH1A	CATCTTACCTGTTGCAACTG
CIRH1A	ATGCCTTTGGAGGACCTATT
CLDND1	AAGGAGATGGAGAATGCCCG
CLDND1	GATCCCGGAAACCACAATAG
CLDND1	CAATGGTGGGATATAAGCTT
CLDND1	AGAATGCCCGTGGCAATGGT
CLDND1	AAAACCTACCTGCAAGGAGA
CLDND1	GGAGATCAATCCCGCTATTG
CLDND1	TGTTCCAGAGTCATTTGATG
CLDND1	CAAAGTACTCACAGGTCCTA
CLDND1	CAGGGAGCTCTAGTTTCTGG
CLDND1	AGGGAGCAGAGACACAAGCC
CLDND1	CCTCTGTCTCCGTAGCATCC
CLDND1	CTTATATCCCACCATTGCCA
CLDND1	CCATACCCAAAAACATGCAT
CLLU1OS	GAATGCCTTAAGACTGCCAC
CLLU1OS	GCCATAGGAAGTACAAGTCT
CLLU1OS	ATTGGGGCACAACGAACTTA
CLLU1OS	CCTTCATTTCTACCAGGCAG
CLLU1OS	TGATGGGAAGAAGGAAGCAC
CLLU1OS	GCATATGTGAGAGCGGGCAA
CLLU1OS	GAGAAGAAAGAAGACACACT
CLLU1OS	CGGGCAAAGGAAATGTGACA
CLLU1OS	ACACACTTGGGCAATGATGA
CLLU1OS	GGCAGTGGGGCCCCAAGTGC
CLLU1OS	ACTTACCAGTGGCAGTCTTA
CLLU1OS	TCCCAGACTTGTACTTCCTA
CLLU1OS	CGCTCTCACATATGCAGAGA
CLLU1OS	CCTTCTGAAATCTCATAGTT
CLLU1OS	GTACAAGTCTGGGAGATACT
CNOT6L	GGAATTTAACCAAGTGGCGA
CNOT6L	ATTGGTGCAGAAGCATACAG
CNOT6L	TGAAGCTTGGCAATATCAGG
CNOT6L	TGGGCTTCCAGGCCTACTAG
CNOT6L	GGAGCCTAAGTACATCACTT
CNOT6L	GAGAAAGCCTCTAGTAGGCC
CNOT6L	AGATAACATTGGTGTCGCTG
CNOT6L	GCCACTCACTTTGAAATCAA
CNOT6L	GCATGAAGTTCAGTAGCTTT
CNOT6L	TTGAAGGAGCGTGGATATGA
CNOT6L	TTCATGCTTGACAATCTCGC
CNOT6L	TTTAGGCAATCCTTTATCAC
CNOT6L	TATCCACGCTCCTTCAATGC
CNOT6L	AAGAGCCGACCAAGTTCATA
CNOT6L	TCAAACCTAGAGTTTGTAGC
CNOT6L	TCTCTTTCTGCCAGCATTGA
CNTNAP5	CAAGCAGGTGAACTTCACGG
CNTNAP5	GATTACAGCAGTGGCCACGC
CNTNAP5	GAGGCTGCCCAGGGTGGCAG
CNTNAP5	AATGTGATGGGCACAATCTG
CNTNAP5	GCAGGCAGCAACTTGAATGA
CNTNAP5	GCGAGGTGTACAGGCACCAG
CNTNAP5	GGGCAGCATGGAACAGCTGG
CNTNAP5	GCAGGCGGGACCTCCTGCAG
CNTNAP5	GAAAGGCACCCTTACTGGGG
CNTNAP5	GAAAACTCCGGATAATGCTG
CNTNAP5	GAACAGCAAAGTCAAAACGC
CNTNAP5	ACAGCCCAGCTCAACTCAAC
CNTNAP5	ACTCTCCAGTTGAGTTGAGC
CNTNAP5	TCACTGAGTGCAATAGCTTG
CNTNAP5	GGGGCACAAAGCGAACAAAT
CNTNAP5	GGGAAATGGATTCTTTACCA
COL16A1	GTGTTGGGCACACTTCACAG
COL16A1	AACTCCTCCGGGAGACCCCG
COL16A1	AACACACCCACCAGAAGACG
COL16A1	GCTCCTCCAGGCAGAAGCAG
COL16A1	GGAGGAGCCTCAAAACAGCG
COL16A1	GAAGGCAGAAAGGGGAGCAA
COL16A1	GCATCTTGTGTCCTCCACAG
COL16A1	GGCCAGGCAGACCAAAGCCA
COL16A1	GGGGCCAGCAGGCATCAAAG
COL16A1	GAACGCCGGGCACCACAGGG
COL16A1	GATGCATTTACCGCGTGGGC
COL16A1	TGGGTGCTCACCAGTCACGT
COL16A1	GGACCGGGATGTGGGTATCC
COL16A1	TGATGGCAGACGTCTTCATG
COL16A1	CTTTGGGCTACCTTCGGCCA
COL16A1	AGCCTGCCAGCCAACGTGAC
COPG2	TGTTCTTTAGTACCATGCAT
COPG2	GATTCTTTACTTACTGAACC
COPG2	GATACAGGACTCCCAATGCA
COPG2	TATCACTTGATGCAGCTTCT
COPG2	TGCATCAAGTGATAATATTA
COPG2	AGAATATGCAAACATCTTCT
COX14	GGTAGACTCGGACACTGCAG
COX14	GAGTCTACCACTATTTCCAG
COX14	GCAGAAGAACAGAAGACCTC
COX14	AAGCATCATGGAGGTAGAGA
COX14	GTTCTTCTGCGGCCTGGCGC
COX14	CCAGTTCTACATGATTCCTG
COX14	GTAGGGGACAAGATGCCAAC
COX14	GGCAAGCAGCTAGCTGACAT
COX14	ATACACAGTGAGAAGCATCA
COX14	CCCTGCGCCACTGGAAATAG
COX14	ATGATGCTTCTCACTGTGTA
COX14	TCAGCTAGCTGCTTGCCAGT
COX14	TCTTCTGTTCTTCTGCGGCC
COX7A1	GGGCGGTGGAGCTGAAGGAG
COX7A1	GTTCTGAAAGCGGTTCCGGG
COX7A1	GAAGGAGCGGATCAGCGCCT
COX7A1	ATCCCGTTGTACCTGAAGGG
COX7A1	ACAATGACGCTGTGTCTGGG
COX7A1	GCGTCATTGTCACTCGGTAC
COX7A1	AAGGCAGAATGCAGGCCCTT
COX7A1	CGCGCACTCGGTTCTGAAAG
COX7A1	CGAGAAACAGAAGCTCTTCC
COX7A1	GGGGAAGGAGGCCCAGCCAA
COX7A1	GCTTCTGTTTCTCGCGCACT
COX7A1	TGAAGGAGCGGATCAGCGCC
COX7A1	TGTCAACGATGCCGCCCTTC
COX7A1	TGACATCCCGTTGTACCTGA
COX7A1	GTCTACAGCTTGTACTCCCT
CRIP3	GCTGCTGGGGCTGAGAGGAG
CRIP3	GTGAATGTCTTCATATGGGG
CRIP3	CAAACAGGTAGCCGTAGCAG
CRIP3	GCTCACATTTCAGGCAGAAG
CRIP3	GGGGCTCTCTTTGGACCCAG
CRIP3	GGAGTGGTGCAGCCAGGGCT
CRIP3	AGACGGGCTCCCCACAGCCA
CRIP3	GCTGGCACCTCAGACACGGT
CRIP3	CCTGGAGCGGAGCTATGAGC
CRIP3	GTCCCCTGGCGGGCATGCAG
CRIP3	AGCGGTGCCAGTTCTTGCCC
CRIP3	CCCCATATGAAGACATTCAC
CRIP3	CTCTCTTCAGGGGTGAACAT
CRIP3	CCAAAGAGAGCCCCATAGCA
CRIP3	TGTGGCAGCGCTCACATTTC
CRIP3	CCCCAGTGAATGTCTTCATA
CRTC1	GCACAATCAGAAGCAGGCGG
CRTC1	GGAGCTGCTCAGTGCAGGGA
CRTC1	GAAGGACCTGAGCCTGACGC
CRTC1	GTACTATGAGCAGCAGATGG
CRTC1	TGTCCACTGACAGGGGCCGG
CRTC1	CATGTACCTCTCACCACCCG
CRTC1	CAGCAGCACCGGCAACCTCG
CRTC1	GGGTGACAGCGGGGACAGGG
CRTC1	TGGGACGCGGGTGGAGGAGG
CRTC1	GGGTGGTGGCTGCTGGGACG
CRTC1	TGGCGACTTCGAACAATCCG
CRTC1	TTACCCGCGCGGCCCGCGTC
CRTC1	CCCAGCCGAGGCCAGTACTA
CRTC1	GTCCGTGTTTGTCCACTGAC
CRTC1	GGGTGGTCCGGCTGGTGTCC
CRTC1	GCAGGGACCCGCCATAGTAC
CS	GCAGCAACATGGCAAGACGG
CS	GTATCAGCCGAACCAAGTAC
CS	AATCTCTACAGAGAAGGCAG
CS	GGCACTGCCCACCAAATGGC
CS	TGCAAAGGACAGGTAAGGGT
CS	GCATGCCAGTGCTTCCTCCA
CS	CTCAAGGGCATCCGTTTCCG
CS	ATTCAGGGATACTAAAGCCT
CS	AACTGGACATATCCCAACAG
CS	CCCCACAGTGACCATGAGGG
CS	CGCCCGGCTCTTGGGAACCA
CS	TTACCATGTCCACAGTGATT
CS	CCTTACCGTGGAGGAAGCAC
CS	TCACCTTGGTTCCCAAGAGC
CS	TAGATGTATGGTGGCATGAG
CS	TGACCTGATACCTAAGGAGC
CXCL14	GGTCAGCATGAGGCTCCTGG
CXCL14	AAGAGCGTGTCCAGGTACCG
CXCL14	GCGGCGTGGGAGCAGGGACA
CXCL14	CAGCAGCAGCAGGAGCAGCG
CXCL14	GCACTCACCGTCCACACGCG
CXCL14	GCACCAAGCGCTTCATCAAG
CXCL14	ACGCCTGGAACGAGAAGCGC
CXCL14	CAAATGCAAGTGCTCCCGGA
CXCL14	GGCGCTGTACACCGCGCGTG
CXCL14	GCCAAAGTACCCGCACTGCG
CXCL14	CTGTACACCGCGCGTGTGGA
CXCL14	CCCCAGGGTCTACGAAGAAT
CXCL14	GCTTCTTCACGTCGCTGTAG
CXCR4	GAAGATGATGGAGTAGATGG
CXCR4	GAAGCGTGATGACAAAGAGG
CXCR4	GCACTCACCTCTGTGAGCAG
CXCR4	CACTTCAGATAACTACACCG
CXCR4	GAAGCTGTTGGCTGAAAAGG
CXCR4	GGAATAGTCAGCAGGAGGGC
CXCR4	CAAGTGGATTTCCATCACCG
CXCR4	GGATGGGGTTCAGACAACAG
CXCR4	GCTGGACCCTCTGCTCACAG
CXCR4	GTACAGGCTGCACCTGTCAG
CXCR4	TGTTGGCTGCCTTACTACAT
CXCR4	GGGCAATGGATTGGTCATCC
CXCR4	ACTTACACTGATCCCCTCCA
CXCR4	CAACCATGATGTGCTGAAAC
CXCR4	ATGCTGATCCCAATGTAGTA
CXXC1	GCTATCGGCACAAGAAGTCA
CXXC1	GAGCCCCGGGATGAGGGTGG
CXXC1	GGTGTGGCCACCAAGGGCTG
CXXC1	GGGCTGGACTCACCGAGGAA
CXXC1	GTTGGGTGGGCAGTGGCCGG
CXXC1	GGTGTGGCTGTAGCCTCAGG
CXXC1	GGTGTCCTGCAGGAGGGAGA
CXXC1	CCCAGAGCCTCCAGATGCCG
CXXC1	GGTGTGACAACTGCAATGAG
CXXC1	AAGAAGTCACGGGAGCGGGA
CXXC1	ACGCCGATTCCATGAGCTTG
CXXC1	CTACTGCATCTGCCGCAAAC
CXXC1	ACTCCCGACAGTACCACTCC
CXXC1	CCATCCGGGAGTGGTACTGT
CXXC1	ATCGGCGTTCCATTTCCTGA
CXXC1	GAGGACAGCAAGTCCGAGAA
CYB5RL	AATGATGCAGAAGGCCACGA
CYB5RL	GATGATGGCTGAGAGGGAAG
CYB5RL	GGAAGAGGACGACGACACTG
CYB5RL	GAAAACCTTCCTCCAAGAGC
CYB5RL	GGCTGAGTACAAAGAAGGTA
CYB5RL	GCCGCAGCACTGGGAAGGCA
CYB5RL	GGAGGCAGCCCAAGCCAGCA
CYB5RL	GCTGAACCCAGAGACCTTCG
CYB5RL	GGAACAGCCAGCTTGGCCTG
CYB5RL	GCTCTGCAGGATAGGCACCA
CYB5RL	CTAAGGACACCTACCGTGTC
CYB5RL	TGACCTCTATCACCGAGATC
CYB5RL	TCGGAGAAAGCCATTCGCAC
CYB5RL	TTATAGAAGAAATCTCCGAA
CYB5RL	CCTGAGTGTACCGTAGGATG
CYB5RL	TGTCCCGGTATGTTGAGTCC
CYP21A2	AAGAAGCCCGGGGCAAGAGG
CYP21A2	AGAGAAGAGGGATCACATCG
CYP21A2	GATTCAGCAGCGACTGCAGG
CYP21A2	GGGAGTAGTCTCCCAAGGAC
CYP21A2	ACATCGTGGAGATGCAGCTG
CYP21A2	CTAAGGGCACAACGGGCCGC
CYP21A2	GAACTACCCGGACCTGTCCT
CYP21A2	CTTGTGGGCTTTCCAGAGCA
CYP21A2	CCCTCTGCAGGAGAGCCTCG
CYP21A2	CCCTCCACTGGCCTGCCACG
CYP21A2	ATCATCTGTTACCTCACCTT
CYP21A2	GAGGTAACAGATGATGCTGC
CYP21A2	CCCTTACAGGTAAGTGGCTC
CYP21A2	TGGTGGTGCTGAACTCCAAG
CYP21A2	CAGGTCCTCACCCTGAGAAA
CYP21A2	TGCCTATTACAAATGTATCC
CYSTM1	CCAGGGCCTGGATATGGTGG
CYSTM1	GGACCCTACCCACCTCCTCA
CYSTM1	TAGGGGTACCCTTGAGGAGG
CYSTM1	CCACCCTGCCAGCCGTACTG
CYSTM1	CAGGAGCCTCCTAAAACCAC
CYSTM1	GGTATGGGGCCGTTGGACCA
CYSTM1	CCTGGACCCATTGGTTGTGG
CYSTM1	ACTGTGGGTATCCTTGGTAG
CYSTM1	ACCTTATCCACCACAACCAA
CYSTM1	GATATGGTGGAGGGTTCTCT
CYSTM1	TAAGGTGGGTATGGGGCCGT
CYSTM1	GCAACAGAGAGCCGTCCAGC
CYSTM1	GTCCTAGCTCATCTCTTCTT
CYSTM1	GGTGGGTAGGGTCCCCCCAT
DCN	GGGCACACTGGGCCTAGGGA
DCN	AAACTTGTGCAAGCAGAAGG
DCN	AAGCAGAAGGAGGATGATAG
DCN	CTAGGGAGGGCTCGAAGTCG
DCN	GATGGCATTGACAGCGGAAG
DCN	CTGTTGAAACGGTCCAGCCC
DCN	GAAGATGAGGCTTCTGGGAT
DCN	AACACTGGACCACTCGAAGA
DCN	ACTCACCCAAATCAGAACAC
DCN	CACGTAGACACATCTGAAGG
DCN	CATCAAGATGTAATTCCGTA
DCN	CTGTACCTATGACAATCATC
DCN	ACCAATCCGCTGAAGAGCTC
DCN	TTCTTACGTGAAGGTTCTTC
DCN	AGTCGTTCCAACTTCACCAA
DCN	TCTATCACCTTGAGGAATGC
DCT	GCCGACTCTGCACCCAGGCG
DCT	TGTGGCTCTCAGCAAGGCCG
DCT	GTAGAGTTCTGGAAGAAGGG
DCT	GAAGGGTTTGATAAAGCAGA
DCT	AGGATGTAGGGACCACTCCA
DCT	GGACCGGTCCCAACTGCGAG
DCT	ATGTTCTGCCGAATCACTGG
DCT	GTGTGGTGATCACGTAGTCG
DCT	GAGCACCCACCTGAAACTGA
DCT	AAGGAGTGCTGCCCACGCCT
DCT	ACGATCCGACTCTGATTAGT
DCT	TCTCTTCTTCGCGAGATCTA
DCT	CGGTGCCAGGTAACAAATGC
DCT	CAGGACCAGGACGCCCCTAC
DCT	GAGTTCCGACTAATCAGAGT
DDX28	GGGATGCGCACCACCGGCAG
DDX28	AACAGCGGCAGAGCAGGCGG
DDX28	TGTGCTGCACGCACTACAGG
DDX28	GAGAATTGGCCCAACAGGTG
DDX28	GCACCAGCAGGCCCAAGGAG
DDX28	GCCTGATCCTACGCATGCCG
DDX28	GGTGGTGACAGCATCTGGGC
DDX28	GTGGAGCTTGGAGCTGGTGA
DDX28	GAACACCAGAACAGTTCCTG
DDX28	GGGCAAAGGCTCTTTCACCG
DDX28	GACGAGAGCTTTCGCACCGC
DDX28	GGTGCGAAAGCTCTCGTCTA
DDX28	CTCCATCGAGCGCGCGCAAC
DDX28	GGAAGAGTCGACGCGCGCGT
DDX28	GTCGTTTGCGCCGCAGAAAC
DEFB107A	GAAAATATTTGTCTTTATTT
DEFB107A	AGCACTAATTAGTAAGAGAA
DEFB107A	CTTACCTTTGAAGTAAAGAT
DEFB107A	GCCCCCAATCTTTACTTCAA
DEFB107A	TGCTCTATGAATTGCTGTCC
DEFB135	GAGTAAGTTAAGGACCACGA
DEFB135	TAAGGACCACGAGGGCCAAG
DEFB135	GGCCAAGAGGACGCTCCTTG
DEFB135	GGCCACAAGGAGCGTCCTCT
DEFB135	GCTTCATGTTGGCGACTGCA
DEFB135	GGCGACTGCAAGGTACTTGC
DEFB135	TTTCTCTTGGCAGGTAGAAG
DEFB135	TTACTCTTCTATGTTCCACC
DEFB135	AAATATTTACCTATACTGAC
DEFB135	AACTATTTCCCAGTCAGTAT
DEFB135	TGCTGATTGGTATGGCCACA
DEFB135	GAACATAGAAGAGTAAGTTA
DEPDC5	GACTTGACCTGCAAAAGCAG
DEPDC5	GAGCACAGGCTGGTGAACTG
DEPDC5	AGCACAAGGAAACTACCTGG
DEPDC5	AGTGGTGATCACGCCCGGGG
DEPDC5	GTGCAAGATGAGAACAACAA
DEPDC5	AAGGATCAGTATATTGGCCG
DEPDC5	ACTGTGGGTTAAGAATGAGA
DEPDC5	GCTTGGTCAGGATCATGAGT
DEPDC5	GTGAGGCACTGGGCCCGGGA
DEPDC5	TCTGGCAGAAAACCTGCAGG
DEPDC5	TGTTAATGTCGTAGACCCTA
DEPDC5	GGAACACTTGAGTCACAGTC
DEPDC5	GCTACATCAGTGAAGATACC
DEPDC5	TATTCTTTCAGAGCACAGGC
DEPDC5	TCTTAAGGAAGATTTACAGA
DEXI	GGGCCTCGTCTTCCTGCCCG
DEXI	CCTGGTCCATGTCCTCGGGC
DEXI	CTTTGATGCGTACTTGGAGT
DEXI	ATAGAGGGCAGCAGCGGCGG
DEXI	GGAGTACATCGTCCTCAACG
DEXI	GTAAAGGCCCGAGCCGGGGT
DEXI	GGGGCCCAGTGCGTCCAGGT
DEXI	GCTCCGAGTCAGCATCGTAA
DEXI	GGCGGCACGTAGGGGACCAG
DEXI	GACCAGGCGCTCGTGGACCT
DEXI	GAGCGCCTGGTCCATGTCCT
DEXI	CGACGTCTTTGATGCGTACT
DEXI	CCCGCTGCATGCTCGGCGCC
DEXI	CGCGGCCCACCTGGACGCAC
DIAPH3	GCAGCCGCGGAGAGAGGCTG
DIAPH3	CCAGCGGCTGAGCCTTGGGC
DIAPH3	GGAAGGGTAGGGAGTCCCAG
DIAPH3	GGGAAAGCAAGATGCCGCGC
DIAPH3	TATGCAGCTCATCAATGCCC
DIAPH3	GAAGGCAGTGGAGGCGGAGG
DIAPH3	AAGAGAATAGCACTGAGCCG
DIAPH3	AGAGCTAAGGTTAAATCCGA
DIAPH3	GCAGCTTCAACAGCTTGAGA
DIAPH3	GTCATGCAAGTCCTCAGGAG
DIAPH3	AAGCCGACAGATCTCACCTC
DIAPH3	AACTTGGGGCGCTTCTCCCC
DIAPH3	AAGACACTCGGAGAGACTCC
DIAPH3	CTTCAGTATCAAAAAAGAAA
DIAPH3	GAATTTAAATGAAGATAAAA
DMRTA2	GCTGCCCGCAGCAACAGTGG
DMRTA2	GGGCAGCCGAGAAGTACCCG
DMRTA2	GCGCTGTCGCAACCATGGCG
DMRTA2	GGAGCGCCAGCGTGTCATGG
DMRTA2	GCAGGCGCAGGAGGAGAACG
DMRTA2	GGGGATGATGCCGTTGGCGG
DMRTA2	GAGGCGGAGCAGCTGGCGCA
DMRTA2	GACGCCACCGACGCCACAGG
DMRTA2	GCTGCTCTACGGCACTGCCG
DMRTA2	TCAGTGTGCGCCGCCGACGG
DMRTA2	CGTTGACCATAGGCCCGTAC
DMRTA2	GTCTGCGCCGTCGGGTGATA
DMRTA2	TAGCGATGCAGCGGCCGCCG
DMRTA2	CGCCAAGTGCACGCTCATCG
DMRTA2	CGATCTCATGCGTGACCGCT
DMRTA2	ACGCGTGTCAAGATATCCAG
DNAJB8	GAACCCTGACAATAAGGAGG
DNAJB8	GAACGGGCAGGAGCGCGTGG
DNAJB8	GGCTAACTACTACGAAGTGC
DNAJB8	GATGTCCTCCGGGGAAGCGC
DNAJB8	GATGTCCTCAGGGTTACGGA
DNAJB8	GTCGGTGACTGTGAACGGCA
DNAJB8	GGCGGAGAAGAAGTTCAAGC
DNAJB8	GTGCTGGCTGTGACAGCTGG
DNAJB8	CCATTCAATAGTGACCGTGG
DNAJB8	AGAATTTCCGGCCTTCATGG
DNAJB8	TCGTCCACCGAGATGATCAA
DNAJB8	TCTTGTCGGGGTGCCAACGA
DNAJB8	CCACCACGGTCACTATTGAA
DNAJB8	CACTTCGTAGTAGTTAGCCA
DNAJB8	AGCCCATTCAATAGTGACCG
DPRX	CATACACCCAACAGTACTGC
DPRX	GCCATTTCTTTCTGAAGGCT
DPRX	GGCTCAGAGGATCTTCGTAA
DPRX	CAACCGCCAATACCAGAGGG
DPRX	GGTGGGGTCTCCACCAGTGT
DPRX	GTACAGGATGAGCTGGAATG
DPRX	GCCGATCGGGTGAGCAGCGT
DPRX	GGGATTCCAAAATGGGGTAG
DPRX	GAAGCTTGGAGCGCAAACTT
DPRX	ATTTGCAGGGACCTTGAGGT
DPRX	CCGATCGGGTGAGCAGCGTT
DPRX	CCCAACGCTGCTCACCCGAT
DPRX	CATGTTCACTAAGAAGCAAC
DPRX	TTACGAAGATCCTCTGAGCC
DPRX	TTAGAAGATGCCAGGCTCAG
dummyguide	ACGGAGGCTAAGCGTCGCAA
dummyguide	CGCTTCCGCGGCCCGTTCAA
dummyguide	ATCGTTTCCGCTTAACGGCG
dummyguide	GTAGGCGCGCCGCTCTCTAC
dummyguide	CCATATCGGGGCGAGACATG
dummyguide	TACTAACGCCGCTCCTACAG
dummyguide	TGAGGATCATGTCGAGCGCC
dummyguide	GGGCCCGCATAGGATATCGC
dummyguide	TAGACAACCGCGGAGAATGC
dummyguide	ACGGGCGGCTATCGCTGACT
dummyguide	CGCGGAAATTTTACCGACGA
dummyguide	CTTACAATCGTCGGTCCAAT
dummyguide	GCGTGCGTCCCGGGTTACCC
dummyguide	CGGAGTAACAAGCGGACGGA
dummyguide	CGAGTGTTATACGCACCGTT
dummyguide	CGACTAACCGGAAACTTTTT
dummyguide	CAACGGGTTCTCCCGGCTAC
dummyguide	CAGGAGTCGCCGATACGCGT
dummyguide	TTCACGTCGTCTCGCGACCA
dummyguide	GTGTCGGATTCCGCCGCTTA
dummyguide	CACGAACTCACACCGCGCGA
dummyguide	CGCTAGTACGCTCCTCTATA
dummyguide	TCGCGCTTGGGTTATACGCT
dummyguide	CTATCTCGAGTGGTAATGCG
dummyguide	AATCGACTCGAACTTCGTGT
dummyguide	CCCGATGGACTATACCGAAC
dummyguide	ACGTTCGAGTACGACCAGCT
dummyguide	CGCGACGACTCAACCTAGTC
dummyguide	GGTCACCGATCGAGAGCTAG
dummyguide	CTCAACCGACCGTATGGTCA
dummyguide	CGTATTCGACTCTCAACGCG
dummyguide	CTAGCCGCCCAGATCGAGCC
dummyguide	GAATCGACCGACACTAATGT
dummyguide	ACTTCAGTTCGGCGTAGTCA
dummyguide	GTGCGATGTCGCTTCAACGT
dummyguide	CGCCTAATTTCCGGATCAAT
dummyguide	CGTGGCCGGAACCGTCATAG
dummyguide	ACCCTCCGAATCGTAACGGA
dummyguide	AAACGGTACGACAGCGTGTG
dummyguide	ACATAGTCGACGGCTCGATT
dummyguide	GATGGCGCTTCAGTCGTCGG
dummyguide	ATAATCCGGAAACGCTCGAC
dummyguide	CGCCGGGCTGACAATTAACG
dummyguide	CGTCGCCATATGCCGGTGGC
dummyguide	CGGGCCTATAACACCATCGA
dummyguide	CGCCGTTCCGAGATACTTGA
dummyguide	CGGGACGTCGCGAAAATGTA
dummyguide	TCGGCATACGGGACACACGC
dummyguide	AGCTCCATCGCCGCGATAAT
dummyguide	ATCGTATCATCAGCTAGCGC
dummyguide	TCGATCGAGGTTGCATTCGG
dummyguide	CTCGACAGTTCGTCCCGAGC
dummyguide	CGGTAGTATTAATCGCTGAC
dummyguide	TGAACGCGTGTTTCCTTGCA
dummyguide	CGACGCTAGGTAACGTAGAG
dummyguide	CATTGTTGAGCGGGCGCGCT
dummyguide	CCGCTATTGAAACCGCCCAC
dummyguide	AGACACGTCACCGGTCAAAA
dummyguide	TTTACGATCTAGCGGCGTAG
dummyguide	TTCGCACGATTGCACCTTGG
dummyguide	GGTTAGAGACTAGGCGCGCG
dummyguide	CCTCCGTGCTAACGCGGACG
dummyguide	TTATCGCGTAGTGCTGACGT
dummyguide	TACGCTTGCGTTTAGCGTCC
dummyguide	CGCGGCCCACGCGTCATCGC
dummyguide	AGCTCGCCATGTCGGTTCTC
dummyguide	AACTAGCCCGAGCAGCTTCG
dummyguide	CGCAAGGTGTCGGTAACCCT
dummyguide	CTTCGACGCCATCGTGCTCA
dummyguide	TCCTGGATACCGCGTGGTTA
dummyguide	ATAGCCGCCGCTCATTACTT
dummyguide	GTCGTCCGGGATTACAAAAT
dummyguide	TAATGCTGCACACGCCGAAT
dummyguide	TATCGCTTCCGATTAGTCCG
dummyguide	GTACCATACCGCGTACCCTT
dummyguide	TAAGATCCGCGGGTGGCAAC
dummyguide	GTAGACGTCGTGAGCTTCAC
dummyguide	TCGCGGACATAGGGCTCTAA
dummyguide	AGCGCAGATAGCGCGTATCA
dummyguide	GTTCGCTTCGTAACGAGGAA
dummyguide	GACCCCCGATAACTTTTGAC
dummyguide	ACGTCCATACTGTCGGCTAC
dummyguide	GTACCATTGCCGGCTCCCTA
dummyguide	TGGTTCCGTAGGTCGGTATA
dummyguide	TCTGGCTTGACACGACCGTT
dummyguide	CGCTAGGTCCGGTAAGTGCG
dummyguide	AGCACGTAATGTCCGTGGAT
dummyguide	AAGGCGCGCGAATGTGGCAG
dummyguide	ACTGCGGAGCGCCCAATATC
dummyguide	CGTCGAGTGCTCGAACTCCA
dummyguide	TCGCAGCGGCGTGGGATCGG
dummyguide	ATCTGTCCTAATTCGGATCG
dummyguide	TGCGGCGTAATGCTTGAAAG
dummyguide	CGAACTTAATCCCGTGGCAA
dummyguide	GCCGTGTTGCTGGATACGCC
dummyguide	TACCCTCCGGATACGGACTG
dummyguide	CCGTTGGACTATGGCGGGTC
dummyguide	GTACGGGGCGATCATCCACA
dummyguide	AAGAGTAGTAGACGCCCGGG
dummyguide	AAGAGCGAATCGATTTCGTG
dummyguide	CGGCTCGTTCTACGCACTGA
dummyguide	TCCAGCGCGAGCTTACTCGT
dummyguide	GGAGTGGTCCCGTACGCAAC
dummyguide	CAAGACCTTATCGTGCAGCG
dummyguide	ACGTCGTTTAGCACCCGGCT
dummyguide	TTTCAGGCTACGGGCGCGGG
dummyguide	CAATCGGCGACGTTTTAAAT
dummyguide	GTACCCCTATGGCCGTTCTA
dummyguide	TACCCACGCGTATTCCATCT
dummyguide	CTTGTTGCGTATACGAGACT
dummyguide	GAACGCCGCTCAAGTTGATA
dummyguide	CGCAGTACGTATAGACTTAA
dummyguide	GCGAACCCCGTAGCCAGGCT
dummyguide	CCTCGGGCGTAAATACTCAT
dummyguide	AGGGCACCCGGTTCATACGC
dummyguide	CACGGCCTAACTTGCTGATA
dummyguide	CCGGGAGATTAACGTTAATT
dummyguide	ATCTCGGGTCGACTGCGGAT
dummyguide	CGCCGGGACCGTTAGGGAAT
dummyguide	GCAAACCCGAGTGACACGTC
dummyguide	GTGCGTGAGTATTAACGCTC
dummyguide	GCTTAACCTATCCGCCAGTA
dummyguide	TGGCCACGAATTCCGCCGCC
dummyguide	GTAAGGCCCGCGTACGAGCT
dummyguide	CTCCTTACGTCGGGCATTAA
dummyguide	ATTCCTTCGGCGCTCTGCGT
dummyguide	ATGCGCTTTAATCGCCGTTC
dummyguide	TTAGCCCTCGATTGGTTGCG
dummyguide	AACGCTGTCGTACGTGTATA
dummyguide	TAACGCGCATATCTGAACAC
dummyguide	CGCTAGGTTATTTCGTGGCC
dummyguide	AATATTTGGCTCGGCTGCGC
dummyguide	CAATATCGGGTGCTACAGGA
dummyguide	CGGCCGCATCCTGTTATATT
dummyguide	CTGGATCGCCCGCAGAAATA
dummyguide	ATTAGCACGGCGACCTTCTA
dummyguide	TGGAAATCGACTGTGCGCTT
dummyguide	ATTAGCCGTTGCCATATCAA
dummyguide	ACCCGATAATAGCTACTGGT
dummyguide	ATTCAGCGCGCTCGCCCTGG
dummyguide	CCCGCCGAAGACCCTGCTTG
dummyguide	TGCCGTGAAAAGACGCTGCG
dummyguide	CTTACGCGCCTGGTCAAAAG
dummyguide	CGCATAAGTCGATAGACACA
dummyguide	GTCATCAGCGATTTGACGAG
dummyguide	CGAATCGGAACTTTGTACCG
dummyguide	AGGTCAAGCCGACCTCGAAC
dummyguide	TGCGCCTTACTCGTTAACTG
dummyguide	ATCTGAGCGTTTTCGGCCGC
dummyguide	ACGGTACATGCGCATGAGTC
dummyguide	TGACGCGATAGAGTTGGCTT
dummyguide	TTCACCGTCCACGTGCGCAT
dummyguide	TTCTTCGGCCTACACCCGGT
dummyguide	GGAATTACGACTAACCGATT
dummyguide	TGCGGGGAGCTCTCTTAATG
dummyguide	TAGAGATATCCGATCGTGGT
dummyguide	GGGTGCCCACTAATAGCCGC
dummyguide	TGCAGTCGCGCTGAGCGTCA
dummyguide	GGATTGAATGGCTAACGCGG
dummyguide	GCGGTTCCGGGAGCACATTT
dummyguide	GAAGACGTGCTGGCGTCACC
dummyguide	GGCGCATTAAAGTCGAGAGC
dummyguide	GACGTAGCCTTCCGAAATAT
dummyguide	GGTTCGAGACCTACTTAAGT
dummyguide	TGAAGTGGGGCGTCGGACAC
dummyguide	CTATATTGTCGCGCAGTGGA
dummyguide	CGGCTTTGTTGCCCGTAAGC
dummyguide	TCCCGGTTGGTGAACGATAC
dummyguide	TTAACTCGAACGCTCGAAAG
dummyguide	GGACTATCCACCGTTTACTC
dummyguide	CAGTAGCGATCGAATGTCAA
dummyguide	TAGGCGCCCGTAGCATTGGA
dummyguide	GCGGCGTCTGGGAATCGTTC
dummyguide	CAGTGTCCGAGCGATATTTT
dummyguide	TTCAATCACCTCACGGTAAG
dummyguide	CGGTTTACATCTGCCCATCG
dummyguide	GGGCGTGTATGTTCGTATTG
dummyguide	GCGGCGTCATCCACGCGTGC
dummyguide	GGGTATAGACGCGATCCTCA
dummyguide	ACAGCGCTCTCGTGTACTAT
dummyguide	ACTAGCCTGTTCGCGAGTAG
dummyguide	GACCGCGTGAGATAACGTCA
dummyguide	CGCGTGCATCTGCCGAAGGC
dummyguide	AAAACATCGACCGAAAGCGT
dummyguide	ACACCGAAGCACCTGTACGT
dummyguide	GGGTCGAGGACTAATAGATT
dummyguide	ACGCCTCCTCAAATTAGCTC
dummyguide	CCTACGCGGTAGGGAACTTT
dummyguide	AAGCACTAGTCCGTATGATG
dummyguide	AGGCGCCAACATTGACCGTA
dummyguide	TAATCATGCACATTCGGGAC
dummyguide	CGTCGGGTAGCTATTTCTTT
dummyguide	GTGCGACGAATTGTCCTGAG
dummyguide	CTTCCGTTATTCGGAAGTGA
dummyguide	TACTGGAGTTTGCGACTCGG
dummyguide	ATCCAGATCACCACGCGTCA
dummyguide	CGTTAAGACTAGCTCGGTTT
dummyguide	ATACGGCCGAAGCCCCTTCA
dummyguide	AACATCTCGTTAGGGGTATC
dummyguide	GTCAGGTAATAGTCGGACTC
dummyguide	TTCGAGGTCCGGACAGGTCG
dummyguide	TGAGCATTCGTAGCCCAGCA
dummyguide	TAAGGCGACCTGCGCTTGTG
dummyguide	AGCTGCGCGCTACTGGATCA
dummyguide	GCAAAAACCCAACGCTATTC
dummyguide	GCCGCCGATTTCATAAGTAA
dummyguide	GTTCCGTGAGGGTTACTTCA
[truncated: 5,929 more rows]
