# Supplementary material for: Negative regulation of autophagy by UBA6-BIRC6–mediated ubiquitination of LC3
Source: eLife. 2019 Nov 6;8:e50034. doi: 10.7554/eLife.50034 (PMC6863627; doi:10.7554/eLife.50034)
Supplement: Supplementary file 4. [file elife-50034-supp4.xlsx]

## Sheet: counts
Supplementary file 4. Summary of next generation sequencing reads in the secondary screen
Gene ID	Sequences	Numbers of reads in the control population	Numbers of reads in the sorted population
AANAT	GGCGCTGACAGCGTCCTCCG	386	588
AANAT	CCGGGCCGCGCTCATGTGCG	325	548
AANAT	GCCTTTGAGATCGAGCGTGA	304	493
AANAT	GACGCCCAAGACGGAGATGA	304	459
AANAT	GTGGCGCCGCTGACAGCTCG	224	456
AANAT	GTTTCGCTGCCTCACCCCGG	284	438
AANAT	GGATCCCAGGTGGCAGACGT	293	418
AANAT	GTCCCTGGGCTGGTTCGAGG	289	412
AANAT	GACATAGGGTCAGGAAGTGC	205	400
AANAT	CCTTCATCATCGGCTCGCTC	129	366
AANAT	GGGGACTCGGGGATCCCAGG	194	258
AANAT	CGCGTCCTCGCACATGAGCG	236	230
AANAT	CGGATCTCATCCAGGTACAG	267	192
AANAT	ACCTTCACGCTCGATCTCAA	152	148
ACADM	ACTGTAGGAGGTCTTGGACT	400	671
ACADM	GTATTTGGGGAGAATGACTG	257	412
ACADM	GCCAATCGACAACGTGAACC	221	387
ACADM	GGGGTTCAGACTGCTATTGA	224	360
ACADM	AACGGGAGCCAACATGGCAG	221	345
ACADM	GATGCTGTGCAGATACTTGG	237	323
ACADM	TGCTCGTAAATTTGCCAGAG	316	322
ACADM	GAAAGCTTACCACAGTTCTC	170	235
ACADM	ATTGTGGAAGCAGATACCCC	118	210
ACADM	TCCCCCTAATTAGAAGAGCC	198	201
ACADM	TGTGTAACAGAACCTGGAGC	146	180
ACADM	AAGATGTGGATAACCAACGG	177	159
ACADM	TGAAGCTACCAAGTATGCCC	142	158
ACADM	GATACCCCAGGAATTCAGAT	106	154
ACADM	CAGAGAGGAAATCATCCCAG	147	122
ACAN	GCGGGTCAACAGTGCCTATC	313	466
ACAN	GTGACAAGGACAGCAGCCCA	222	465
ACAN	GCTGCGCCCTGTCAAAGTCG	290	446
ACAN	GTCGATGAAATAGCAGGGGA	233	441
ACAN	GAAGGAGGTAGTGCTGCTGG	302	429
ACAN	GGGTGACGATGGGGTAGCGG	239	416
ACAN	GGCCTGCAGCTGCTCAGGCG	270	385
ACAN	CCCCAGAGTCATTGGAGCGC	196	378
ACAN	GATTCTTGGGGCCAGTGGGG	343	339
ACAN	TGGGGCGGTAGAAGGGGCGG	319	320
ACAN	GGCATGGACATGTGCAGCGC	182	278
ACAN	GCTACACCCTCGACTTTGAC	200	230
ACAN	GTTGGGCCGGGCCTTGGAGA	235	188
ACAN	CACGAAAACCCAGAGTAAAG	97	187
ACAN	GAACTATGACCACTTTACTC	100	103
ACAN	TGAGCTGCCCAGCTCTGGGG	189	77
ACER3	ATGCAACAGCTGTATATCAT	320	522
ACER3	TGAACTGCACCGAACATTGG	370	482
ACER3	CTCTGAACTGCACCGAACAT	341	479
ACER3	ATGATTATACCTCCAATGTT	319	460
ACER3	CCAGTCCAGCGTGGAGGTCG	269	433
ACER3	CCACCATGCATGAAATTGTG	275	398
ACER3	GTGGTAATACCTATGATAGG	256	384
ACER3	TTAGAGACGGTCTGGAAAAG	300	384
ACER3	ACACAGGAACTTTCGAAAGA	237	310
ACER3	GGATGTGAAGATAGGAACCA	301	274
ACER3	GCAGTTCAGAGTGTTAGAGA	272	272
ACER3	TTTCATATTTCAGAGTCATG	229	249
ACER3	CCACACAATTTCATGCATGG	191	225
ACER3	TAACCCAGTCCTCTAAGCCA	234	183
ACER3	GAGATATAGGCCAAAAGTGA	173	174
ACER3	GCGGACCGAGAGGGCTACTG	154	158
ACOT1	CGCTACCGCGCCGACACCCT	496	879
ACOT1	GGTCTCGCCCTTGTAGCGTA	364	724
ACOT1	CATGTCCACAATGCCAGGAA	254	482
ACOT1	TGGGGGAACCTTACGCTACA	255	461
ACOT1	GACATGTTCGGAACTGGAGG	248	458
ACOT1	CTACTTGCTCAGTCATCCTG	255	449
ACOT1	CTTGGAGCCCGAGAAACCCT	302	412
ACOT1	CCGAACATGTCCACAATGCC	177	386
ACOT1	AGTAGCGCTCGTGCCGCACC	280	336
ACOT1	GAGGTGAGTCACCTGGCGGC	289	335
ACOT1	GACGCTGATCCTGGAGCCCG	239	310
ACOT1	GCTCCAGGTCCAGCTCGCCA	221	304
ACOT1	GCTCGCCAAGGGTGTCGGCG	291	289
ACOT1	CCGGTTCGTCCCAGCAGCAG	175	202
ACOT13	GAAGAGCATACCAATGCAAT	313	545
ACOT13	CTTGTTGGTCAGATCCACAG	351	478
ACOT13	AAAATTGCGAGCCTTGGTCA	361	403
ACOT13	AACACTTGCATTTACCTCTG	258	388
ACOT13	GTGGAGAGTGCCTATTGCAT	263	376
ACOT13	GGTGATAAAGGCCATGACCA	189	372
ACOT13	GCTCTGCTATGCACGGAAAG	226	351
ACOT13	ACAGCACATGTTCTGAAGCA	294	349
ACOT13	ACGTGGCTGTCAAACCGCCG	172	293
ACOT13	GCAATAGGCACTCTCCACGG	253	255
ACOT13	TGATATGTTATCTACTAACG	203	162
ACOT13	TCTCTCAAAATTGCGAGCCT	97	154
ACOT13	GGAAGACACACAAAACACCT	91	133
ACSL5	CAGACACAGCGAGTCCTCTT	445	550
ACSL5	GTCATCCTTAGTAGGAGTGG	288	513
ACSL5	GAAGAATGTCATGACTGAAG	207	498
ACSL5	CAAAGAGGACTCGCTGTGTC	265	492
ACSL5	CAAACATATGAGCCAGAGGG	310	491
ACSL5	AGAAGAGGTAAGACGGGTTG	364	434
ACSL5	TTTGTAAGATAGCCATCTGT	316	377
ACSL5	TTTAGACAATGGGCCCTGCT	292	375
ACSL5	CAGGATGCAGATCAACGCCG	188	357
ACSL5	GCTTCCAGCTGATATCGCCA	219	320
ACSL5	GGGTGTGTCACAGATCACCA	206	294
ACSL5	GGTGATCAGCCACAAGAAGA	211	283
ACSL5	GAAGCCCACATTGTTTCCCG	206	254
ACSL5	AGAGCACTTCAGAAAACCTG	219	224
ACSL5	GTCAGGATGCAGATCAACGC	172	199
ACSL5	TGAGAAGACACAGGAAGCCC	122	87
ACTL6B	TCCCCGCACAGATGAGGTGG	386	582
ACTL6B	ACTATGAGCGGGGGCGTCTA	356	534
ACTL6B	GTCATGTCGCCCCTCAAGAA	315	520
ACTL6B	GAGATGAAGTCCCCTGCCAG	340	404
ACTL6B	CGAGCGACTCCGCATCCCTG	263	374
ACTL6B	ATGACCTCCGCTCCATCCCG	326	312
ACTL6B	CAGTGGAGCCACCCACACCA	190	295
ACTL6B	GCCCTGCACGTGCCTCGGGA	277	292
ACTL6B	GTCTCCCCGCACAGATGAGG	145	262
ACTL6B	GGCCAGCAGCCCCACTGTGG	307	260
ACTL6B	GCAGGGCATTGGTGTCGATG	299	243
ACTL6B	GGAGCCTCGGACATGAGCAC	197	225
ACTL6B	GAAGAAGGAGAAGCTACCCC	257	223
ACTL6B	GGGAGTGTCATTGTCACCGG	179	196
ACTL6B	GGCTCCTTCTCAGTCCGCGC	137	166
ACTL8	GTGCTACGTGCCGCAGAATC	410	690
ACTL8	GAACTCCAGCGTCTTGCCGC	244	570
ACTL8	CACACGCCTACGGGCATAGC	284	385
ACTL8	GATAACGGTTCTTGCAGCCA	366	380
ACTL8	GGACCGAAAGAAGATGCTGG	157	372
ACTL8	GAACCACAGACGGGAGCAAG	278	306
ACTL8	GGGCCGCATCCTCAACTGGG	240	294
ACTL8	ACGGATTCCACAATGGCCCG	274	294
ACTL8	GACACCCTTGAGGGAGCCTG	237	283
ACTL8	CACGCCTACGGGCATAGCTG	196	220
ACTL8	GGTAGCTAAAGGTGTCAGGA	136	195
ACTL8	CCGCTCGATGGGGTAGCTAA	181	192
ACTL8	AGAACCGTTATCATTGACCA	256	126
ACTL8	CTACCGTGCAAGGAGAACCC	132	112
ACTL8	TGTCTCCGTGATGATCACAG	178	80
ACTL8	TCTCCAACACAAATGACCAG	115	40
ACY3	TCTTCCTGTACCAGCGGTCT	307	595
ACY3	GTAGCGGCGGCAGCCGGATG	272	521
ACY3	GCAGGTGCCCATGTTGGCCG	220	455
ACY3	CTATAGACCCGTGGGCGTCG	241	421
ACY3	GTCACCTCATATGGGTCGTC	291	382
ACY3	GGTGCATGGCAAAGACTTCG	300	347
ACY3	GGCAACGCCCTTCTCATAGT	251	341
ACY3	GTCACAGCCACGCGACGCAG	192	326
ACY3	GAGAGCTGAACCAGCTGCTG	172	317
ACY3	GTTGGCCAGCACAGGCACAG	255	305
ACY3	GCCAGGTCTTCCTGTACCAG	223	297
ACY3	GGGGAAGTCCACGACGCCCA	123	252
ACY3	GGTCATGGTCCACGTAGCGG	156	245
ACY3	GATGGAAGCCTATAGACCCG	250	233
ACY3	TCAGCCCGCAGCACACCCTG	156	170
AK2	CTCTCTGTAGGCACCCAGAT	397	917
AK2	GAGTGTGGTAGGCTTGCAGG	262	592
AK2	GCTCACCTGGGTCCCTTTAC	357	575
AK2	CCGGATGCCTTTAGGATACT	280	541
AK2	TGCTTGCGAACACGACATCG	247	492
AK2	GTCCCTTTACCGGCCCCGGG	343	473
AK2	GCATCCGGGCCGTGCTGCTG	301	471
AK2	CTTCCAGGTGAGTGATGAAA	373	459
AK2	GACTGTGAGGCAGGCAGAAA	206	420
AK2	TTTACAGCTCGATGACCTCA	196	408
AK2	TTCCTGTTCTCAGATCACCG	260	342
AK2	AATACCTTCCTGTGATTCTT	167	314
AK2	TCATCTGATCGACGGATCAA	265	260
AK2	CAAAGCCACATGTAAAGACT	174	221
AK2	AGGCTGATTCACCCCAAGAG	259	210
AK2	GGGATGCATCGATGGCGGAG	160	126
AK9	TCCCCAGAAGTCTGTCACTT	559	910
AK9	GTTTACCATAACTCCTGATT	300	511
AK9	TCCATGCCTGTGTTATGTAA	388	502
AK9	GGTGGAAGCAGATAGGGACG	259	485
AK9	TGAAACCGAATCAGGAGTTA	310	349
AK9	ATTGCTGCTGAAACCGAATC	231	322
AK9	CCCGTTACATAACACAGGCA	309	321
AK9	TATTGCCGAAATGCAGATGG	221	293
AK9	AAAGGACGGAAAAGGAGAAG	230	290
AK9	ACATATACAGTAGAGACCAG	203	284
AK9	ACTTGTCATAAAGCTAATGT	154	258
AK9	CAATGACTTCAGGATCCCAC	102	234
AK9	ATTAGCCCGTTACATAACAC	191	203
AK9	AACCAAACTTCAGGGTGCAG	235	188
AK9	AAGAAAGAAGCCCAAAAGGA	140	181
AK9	ATGGCATCCTGTGAAAGTGA	121	162
AKAP11	GACATTCACTGAGGAAGTTG	315	479
AKAP11	AGTGACAAAGTCATCCTCTA	198	464
AKAP11	GCAGCACTGCCTGATCACAG	318	433
AKAP11	ACAAAAGTTACCTGATTTAG	266	424
AKAP11	GAGTTGTGTGGAGTAGAAGG	325	404
AKAP11	AAGCAGTGATCCTCTAAATC	247	379
AKAP11	TATGGTGACAAAACCAGTGC	243	348
AKAP11	CCAGTCTGTGTCATCCATAG	226	325
AKAP11	CTCCTAAGTAAATATGCTAC	186	324
AKAP11	TCATAGGGAAGTCATCGCAG	192	313
AKAP11	TGAGCATGCCAATTTAACTG	249	308
AKAP11	ACTATGCAGTGTAACAGCAG	234	300
AKAP11	CACCTACATCACCAAGACTT	180	266
AKAP11	GAGAATCCGGAGCATCACAC	169	220
AKAP11	TCCAAGAGGACTAAAAGCAG	188	182
AKAP11	AAGTCAAACGACCCACACTG	131	141
AKAP3	CAACTTTGCATACTCCATTT	456	606
AKAP3	GACTGGTTACAAAGCCAAAA	326	601
AKAP3	TCCTGGAGACAACCAAGCCC	263	545
AKAP3	GTATTCTGAACCCAAATCAG	224	462
AKAP3	GAAGTTGTGTGAAAGACCGT	400	442
AKAP3	TGAGGGTCCCTGTGACGCTG	242	359
AKAP3	GCTGTGGAGATTCCTCAAGA	223	344
AKAP3	GTCGGTGCTGCGCTATGAGA	267	325
AKAP3	TCCCCACCGCCTCATTCAGC	225	298
AKAP3	GGAGATTATGCCAGAGAGGG	319	276
AKAP3	GAGGATATGGAGGAAGGCTG	214	269
AKAP3	GATTCATCGGGAGCTACAGG	212	242
AKAP3	GAAGGCCGAAGTTAGCCTAC	251	241
AKAP3	GTGATTGCTGACAATCACCG	163	212
AKAP3	GAGAGCACCAAAGAAAGACA	120	86
AKAP6	GTGTCTGTGGAGGATGAGGA	333	566
AKAP6	GTGTCTCCAGATACAGTTTA	410	495
AKAP6	GAAATCAAGCAACGACGTCG	171	452
AKAP6	ACTGTATCTGGAGACACACT	285	450
AKAP6	CCATTCCTAGTGACGTGACT	260	435
AKAP6	AGATCCAGGACACAATGGCA	251	427
AKAP6	GGGAGAACTCTGTTTCAAGG	145	357
AKAP6	GATGTTGTCTGAGCCAACAG	313	346
AKAP6	GGGTGAAGCATCAGTAGCCA	207	334
AKAP6	CCTGAGCTTATCCGAAGTGT	224	328
AKAP6	GCTCCGGATGACCTCAGAGA	222	295
AKAP6	TTACTCTGTCAACGTGATAG	373	262
AKAP6	CCAGCACTGAGACTCGAAGC	174	234
AKAP6	AGAGCAACCAGGCTTAACAC	166	193
AKAP6	GCTTGATTCTCTAACAGAAG	170	133
AKAP6	GGAGCAGGGTGAGGGAGAAG	86	26
AKR1B1	CATGGGCACAGTCGATGTGG	292	690
AKR1B1	TGGGCTCACAGGTCCTGATC	272	596
AKR1B1	CGCCCACGTGTCCAGAATGT	309	539
AKR1B1	GACGTCAATGGCCACCTTCA	298	478
AKR1B1	TCAGGTCGCTGAGTGTCTTC	264	474
AKR1B1	GCAGGTGACTGAGGCCGTGA	360	446
AKR1B1	ATTGTAATGACAGCCTGGGA	351	433
AKR1B1	GGAGGGTCTGTGCCTTGTTG	397	423
AKR1B1	CAAGATGCCCATCCTGGGGT	305	351
AKR1B1	GGGGCTCACTCACCTCAACA	173	337
AKR1B1	GTAGGCCATGGAAGAGCTGG	209	297
AKR1B1	AGATCATCTCCACCTGGAGA	206	283
AKR1B1	GAGCAGGAGACGGCTTGCCA	182	282
AKR1B1	GGAGCTCTTCATCGTCAGCA	230	264
AKR1B1	TCCCATACCTTAAAGCCAGT	117	246
AKR1B1	CAACTTCAACCATCTCCAGG	145	164
AKR1C4	CCAGGTCATGGAGAAGTGTA	354	621
AKR1C4	CCAAGAGCTACAATGAGCAG	285	578
AKR1C4	TTCCCTACCTTGAGAGCCAT	363	511
AKR1C4	TGAATTCCAGTTGACATCAG	285	457
AKR1C4	TCCGAGGAACAGAGCTGTAG	314	418
AKR1C4	GCCAGCTTCTATTGCTAATT	318	418
AKR1C4	CAGCGTGTAGAGCTAAATGA	173	343
AKR1C4	TGGGTCCTCCAAAAGAACTG	341	289
AKR1C4	GGGTGTCAAACTTCAACTGC	170	241
AKR1C4	AAAAGTAATATTCGACACAG	129	213
AKR1C4	GCGGATCAGAGAGAACATCC	120	204
AKR1C4	ACAGATGGTCCAACCAGCCT	120	161
AKR1C4	CACTTTCTTTCAACCACAGA	98	151
AKR1C4	GAACCCAACGACATAAACTA	59	83
AKR1C4	TTTGCTAAGGCACAAAGAAC	98	71
ALDH3A1	CTACATCCACTCGGAGCCAC	329	693
ALDH3A1	GGGACACCCCCATTGATTAC	280	543
ALDH3A1	CAAGAACTGTGACCTGGACG	291	500
ALDH3A1	GGTCCTGCCCGAGCTGAAGG	357	486
ALDH3A1	GTTCGACCATATCCTGTACA	291	437
ALDH3A1	CATGTTCTCACTCAGCTCCG	236	389
ALDH3A1	GAAGCTCCCTGAGTGGGCCG	260	379
ALDH3A1	AGTTCCAGGTGCCAATGACG	284	319
ALDH3A1	TACCATCATCCCCCAGTACC	211	318
ALDH3A1	GGATCCGGAACTGCAGCGGA	246	290
ALDH3A1	GCAGCGCCTGATCCAGGAGC	149	250
ALDH3A1	CAGGCTGCGCACGCACACGA	150	224
ALDH3A1	GGGCCATGCACCTGCAGCGA	89	211
ALDH3A1	GGTGGGGAAGATCATCATGA	153	165
ALDH3A1	GCCTCACCAGGCAAGAGCGG	105	163
ALDH3A1	ATGGAACGCCTACTATGAGG	264	137
AMY1A	TTTCTAGGTTCGTATTTATG	285	608
AMY1A	GTCAGAGATTGTCGTCTGTC	309	461
AMY1A	GTTGGGCCACCAAATGATAA	218	400
AMY1A	GAGCCTCTATACTTACCTTC	306	390
AMY1A	AACAGTAACTGGTTCCCGGA	236	370
AMY1A	TGTGGTAATGCTGTGAGTGC	201	337
AMY1A	GAGCGATATTTAGCTCCCAA	209	284
AMY1A	CGTACCTCCTGGTAAATGAA	129	218
AMY1A	TTCACAACCCTTTCAGACCT	141	217
AMY1A	AATCAACGAGGACATGGCGC	167	181
AMY1A	TGGTCTTCTCGATCTTGCAC	217	162
AMY1A	TTAAAATCCCATCCAGAATA	132	162
AMY1A	TTCTAGGTAATTGATCTGGG	216	158
AMY1A	GACTAGATGCAACAATGTTG	181	148
AMY1A	GTGCATAATTTATAGCTAAC	64	113
AMZ1	GGTACAGGTCAGACAGTGTG	473	738
AMZ1	GGGCTTCCGGTGCTGCAGGG	330	645
AMZ1	GTCCCGTACCTATCGGCTGT	302	614
AMZ1	GGAGCCAGTCGAAGCCCGTG	305	560
AMZ1	GCGCGTCAAGTGCCTGCCGT	318	535
AMZ1	GCAGCACTGAACCATCCCCA	343	530
AMZ1	AGAGCGTCCTTCAAGGCCCG	385	523
AMZ1	ATGGACGCGGCTGCCACCGA	328	514
AMZ1	GTCTGACCTGTACCCCCATG	354	512
AMZ1	GCTGCAGTGTAGACCCGCAC	239	436
AMZ1	CGAGGAGCAGCGGATGGACG	297	388
AMZ1	ACGGCAGGCACTTGACGCGC	182	309
AMZ1	CCAGCTGTGCAGCTGCACAG	214	303
AMZ1	CAGGAAGAGCCGCTCGGCAG	270	225
AMZ1	CCGAGGCCTACAACCCGCAG	155	184
ANKRD34B	CTTCTAGCAAAAGTCTTGTG	255	447
ANKRD34B	CATGCAGTTTTAGAAAGGCG	265	428
ANKRD34B	ACAACAGCAAAGTTGCCCTG	176	386
ANKRD34B	GATCGGCATTGTTCTCTAAC	308	348
ANKRD34B	CAATGCCGATCCCAACATAC	179	318
ANKRD34B	ATTAATGAGAGCAACGACCG	191	293
ANKRD34B	GCTCCAGGATATTACACCAG	207	292
ANKRD34B	TTTAGTAGTATGCTTCCCAC	188	289
ANKRD34B	GGGTAAGGCCAGCTGAGAGC	198	231
ANKRD34B	GTTTCCTCACAGGGGAACCT	188	225
ANKRD34B	GATGTCTATTTCTGAAGGAG	222	192
ANKRD34B	GGAGCAAGGAAACAACTTCA	126	157
ANKRD34B	TGACACCCATCTATATCCAC	125	140
ANKRD34B	AGTGTTACCCAAACCAGACA	95	123
ANKRD34B	TAGAATGGTCTTGCAAGCTG	125	123
AP3M2	TGTGGCCGTGATCCAGACGG	339	534
AP3M2	GATGCCTGTGTCAAGCTGAC	274	510
AP3M2	CAGCGTTTGAAACGAACACA	260	489
AP3M2	TGAGGGGTAGGGATAACCGG	335	485
AP3M2	CTTGTGTTCGTTTCAAACGC	284	463
AP3M2	TGAGTTTCTTCACCGAGTGG	327	456
AP3M2	GGCGCAAGAGAGAGCTACTG	262	381
AP3M2	TGAGCCTTACTCCATCACAG	262	342
AP3M2	TGGTGTTGACAACCGTTCGA	346	287
AP3M2	CAATTACTGCTGAGATCCAG	193	272
AP3M2	GTTTGAAACGAACACAAGGA	143	246
AP3M2	GGTGGGACCCAAGCAGACGA	172	203
AP3M2	TGGACGCTTTGAAATAACGG	175	202
AP3M2	TTCACCCCAGTCCGTCGCCA	129	173
AP3M2	TGCCTCAGGAAGCACGAATG	154	112
APLF	ACTGGTGCCTCACAACTGGA	390	595
APLF	CAGAGGGTATAGAGAGAATG	330	552
APLF	GGTAATGTAATCCAGGGAAG	222	542
APLF	CAGAAGACATGCCATTCTTG	326	520
APLF	GGGGAGACGGTGATCGGCCG	224	516
APLF	TCAGTACCAGCAATCAGTGG	384	505
APLF	GCCATTCTTGAGGTGGCAGG	292	421
APLF	TGGTCAGCTGCGAATCAAAC	110	349
APLF	TACCATTGAAGCCAAATCTA	201	318
APLF	CATCTAGAAAGCTGTCGTTC	255	313
APLF	GTCTATATTCTATCTTGTGC	205	312
APLF	ACATCAGCAGAACAAGACAC	167	305
APLF	GGGGCTTCGAGCTGCAGCCG	175	245
APLF	GATGACTCCCACAAATAGTG	204	244
APLF	CCCACACTTACTCCCAGCAG	201	242
APLF	TATAGACATAATACGCTTCC	121	164
AQPEP	TATGTTGTCTCCCACGAGAT	519	590
AQPEP	AGAACTTTTCGCAAAATGGG	327	565
AQPEP	GGGCACTGGGAACGCCACAG	264	517
AQPEP	ACGGTGGGACGCGCTCGCAG	210	465
AQPEP	ATGCCTGGTGTCCAATCTCG	282	435
AQPEP	CCCTTTCTGTTCTGTTGACG	328	433
AQPEP	GGGTCGCCAGTTGCTCGGGG	239	365
AQPEP	ACAAATGCGACTAAGTAAGT	202	341
AQPEP	GTTCCAGCTGGGACGCTAAC	222	325
AQPEP	TGAGCTGCAGCAAAGACCCA	239	320
AQPEP	GTGAAGGGCAAAGACCCGGC	156	317
AQPEP	GGCCCTGTTAGCGTCCCAGC	167	297
AQPEP	GATGTTCACGCGGCCAGTGA	247	283
AQPEP	GAGCTGGCTCATCAAAACAA	118	269
AQPEP	ATGCAGCAGCAGTCGAGAGG	182	268
AQPEP	GTGAAGGAAGACCTCAGGGA	247	232
ARHGAP36	TCAGACGCTCCAGCTCAGAG	369	837
ARHGAP36	CCCAGAAGTCGTTGGCCAAT	520	727
ARHGAP36	CTCCGTGCAGCGAGTGCGTC	356	636
ARHGAP36	TACCTGACGCACTCGCTGCA	294	588
ARHGAP36	AAGGCGGACAACAACAGCAA	383	494
ARHGAP36	GAATGAGCCCACCTTGCCCC	191	469
ARHGAP36	CAGCAAGCCTCAACAACCTG	242	437
ARHGAP36	GTCGGGGAAACGTGGTGCGA	251	416
ARHGAP36	TCAGTTCAAGATGCTTGCGG	304	407
ARHGAP36	GCGGTCGGGGTTGTGTCCTG	270	358
ARHGAP36	TTTAACTCACTCGACGCCCA	193	319
ARHGAP36	GATTGCGAAACAAATCCCCC	112	315
ARHGAP36	TGATTTTGAGAGGACAGCAG	258	304
ARHGAP36	GCCTGCGACTGAAAAAGCGC	140	270
ARHGAP36	AGAGTCCAGGAAAACAAAGC	204	233
ARHGAP36	GAGAGCAGATCCAAACACCA	142	158
ARRB2	ACGGAGCATGGAAGATTCTG	353	614
ARRB2	AAGCTGGTGGTGTCTCGAGG	360	525
ARRB2	TCAGCAGCCGGTCCTGCAGG	431	523
ARRB2	GAAGTCGAGCCCTAACTGCA	343	518
ARRB2	GTAGTGTGCTCACCTGACTG	350	481
ARRB2	CCTGGTAGGTGGCGATGAAC	258	436
ARRB2	TCACGGTGAAGAAGAAGGGG	298	419
ARRB2	CAGTACCTTTGCGGTCCTTC	213	398
ARRB2	CCTGTTCATCGCCACCTACC	265	388
ARRB2	GATGAACAGGTCTTTGCGGA	247	368
ARRB2	GAAGGAGGGTGCCAACAAGG	305	270
ARRB2	ATAGCGGAAGGCGCAGGTGA	209	263
ARRB2	CCGAAAGGTGCAGTTCGCCC	102	242
ARRB2	GACTACCTGAAGGACCGCAA	163	231
ARRB2	CCAAAAGCTGTACTACCATG	162	187
ARRB2	GCGGGACTTCGTAGATCACC	103	149
ASB12	AGGCTCTGCGGACGACTAAA	325	667
ASB12	GCATTGCTGCTACAGGCCCG	424	613
ASB12	GGAGGAGGACACTGACACAG	261	547
ASB12	GTCTTGGGACACGAGCCAAT	357	486
ASB12	GGACACGAGCCAATAGGCCC	277	479
ASB12	TGACTGACAGCAGTGAAAAG	281	452
ASB12	TCCACGGTCACTTCTATCAC	323	413
ASB12	GTAGATGCTACCACCAGGAG	236	405
ASB12	CTGCAGGAGCTCCTAGACCA	317	364
ASB12	GCAGCCCGACAAGGAGGAGG	230	328
ASB12	GAAGCTGGTGCCTCTCCTGG	253	282
ASB12	TGAAACGTTTGTAACGCTCC	788	264
ASB12	TGACAACGACTCCTATACTT	151	243
ASB12	AACGCTCCTGGCGCAAAAGC	142	214
ASB12	GATGGAGGCAGATTTCAAGG	167	165
ASB12	CACCAAAATCGATTAACAGC	115	165
ASB7	GTGGTACCTTTATCACTGAG	455	836
ASB7	GAGTCCAGCCATTCGCATCT	480	663
ASB7	GTAGTTCATCAAGTAGCTTT	331	566
ASB7	TGTTGGCATTGTGGTCCAGG	357	539
ASB7	GTGCGAAAGATGCTAGAACA	290	499
ASB7	GACATCCCCAGCAGCCACCG	285	481
ASB7	AGAGGGGCAGACACAAACTT	328	417
ASB7	CCGAATGGCCGAGATGCGAA	337	403
ASB7	CGGCTGGACTCCCCTCCATG	294	390
ASB7	AGAGTTGCAGATTCAGGCCG	243	385
ASB7	ACGGAGCAGACACGAACACA	287	348
ASB7	TGATGAACTACCAATTGCCA	251	331
ASB7	TGTTACACCATCATTGTCGA	181	328
ASB7	CTAACATCAAGCGTGCAATG	229	285
ASB7	TGTGGCTGCCCACTACGGCA	242	245
ASB7	AGCTCGCCATTATCCGAGAG	236	210
ASB9	ATGCATGAAGCTGCAATCCA	367	626
ASB9	CAAGGGACTTTCCTGGCATC	289	583
ASB9	TGAATGGTGTGACAGCAGAC	329	505
ASB9	GGGAATCCTGACCTTTCCCT	297	445
ASB9	TATGACTCACCGCCCATCAA	293	429
ASB9	AAAAAGCTACCTGGCTGATG	214	381
ASB9	GTGGGCTGTGAACATCATCA	261	363
ASB9	TTAGGAGCGGACGTGAACCA	345	361
ASB9	AATAGAGTGGAGTGCCCAGG	315	357
ASB9	AGAGAGATGACCTCCAAGAC	206	279
ASB9	CATGGATGGGAGCAAGCCCG	224	271
ASB9	CTGACACAAGCATTAAACAG	203	238
ASB9	CAAGACAGGCTTCATGGAGT	302	238
ASB9	GGATTTTGGAGCGGACACCC	176	134
ASB9	GGTGCCTCCAGAGAGCCCCT	97	107
ATF7IP	AGAGGTGGGATCACCAGAGG	272	534
ATF7IP	AGAGGAGAGATCATCAGCAG	363	469
ATF7IP	GTAAACAATGGACTAACCCT	235	437
ATF7IP	TTCAAAGCGTTTGGTTAACC	243	433
ATF7IP	AGGAAGTAAAGCAGAATGGA	307	338
ATF7IP	GAGTTGTATAAACCACCTGG	347	336
ATF7IP	AGAGGCAGCATCACTAGAGG	315	334
ATF7IP	TGAAAAGGACAACAAACCTG	258	307
ATF7IP	GAAGAGAGTGGAGCTTCACA	288	303
ATF7IP	AACAGTTCTCACTGAACTAC	235	300
ATF7IP	AGAGGAGGGCTCGCTAGAGG	213	263
ATF7IP	TGCTGTATTTGATAAGACTT	336	262
ATF7IP	GGATGGCTCTGTAGAAGCTG	241	246
ATF7IP	GCAATAATAACATGTCTTAC	149	242
ATF7IP	TGTTTCTTTAGGTTATACAG	139	157
ATF7IP	CCCAACCCACCAGTATCACC	136	114
ATG4C	AATTCTCCTGTATTATTGCT	302	445
ATG4C	AGATTGGTATGGACCAGCTG	232	393
ATG4C	TTGGTTTGGTGATTCCCCCT	360	354
ATG4C	ATAGAGGATCACGTAATTGC	206	326
ATG4C	GAACTACTATAGCTTGGACC	141	305
ATG4C	AGAGTCGGGATGTACAATAG	292	302
ATG4C	TGGGGCTGCACATTGAGAAC	258	288
ATG4C	TCAGCTTTGACAACAGACTG	246	280
ATG4C	AATATTCAAAGCATCAGGCC	139	237
ATG4C	GAGAACTGGCCAGATGCTCT	249	228
ATG4C	ATTGTACATCCCGACTCTGC	124	151
ATG4C	ACTTACCTTCATATTTAAAA	44	133
ATG4C	TTATCCACAGTACCTCAAGA	108	123
ATG4C	AGCTTCTGAAGAAATCACCA	46	35
ATG7	TAGGGTCCATACATTCACTG	1201	11787
ATG7	TGGGAAAAGAACCAGAAAGG	982	8143
ATG7	TCCGTGACCGTACCATGCAG	912	8050
ATG7	GGAGCAAGCCCGCAGAGATG	827	7786
ATG7	GGTGAACCTCAGTGAATGTA	994	7748
ATG7	GCCCAAGGCTCTGGCAGCAG	798	7185
ATG7	GGTCAGCAGATGCCACAGGG	705	5442
ATG7	AGCAACAACATACCACACCG	555	4619
ATG7	GCTGCCAGCTCGCTTAACAT	675	4582
ATG7	ATAGCTGGGCAGCAACGGGC	495	3686
ATG7	AGAAGAAGCTGAACGAGTAT	452	3308
ATG7	CTTGAAAGACTCGAGTGTGT	529	3025
ATG7	GAAGCTGAACGAGTATCGGC	380	2996
ATG7	GTATGATGAGAACATGGTGC	482	2813
ATG7	GCCCGTTGCTGCCCAGCTAT	514	2414
ATG7	GATACTCGTTCAGCTTCTTC	155	213
ATIC	AAGGCTTCTTCTTCATATCC	242	486
ATIC	TGTGCGATGCTTTGAACGCC	224	458
ATIC	TTCTAACCAGGTGCTGCTGT	391	352
ATIC	TCTGATGGTATAATTGCCCC	272	168
ATIC	GTGCTACGCCAAGAACGGGC	124	162
ATIC	TCTTGCATATGCCGCTGAGA	185	148
ATIC	GCAGTGTGTACAGCTGGGCA	207	95
ATIC	GCAGCTGGTGAAGGAACTCA	190	79
ATIC	GCGGCATATGCAAGAGCAAG	134	78
ATIC	AAACCACGCTCGAGTGACAG	109	54
ATIC	TCGCACAAGTTTATAAATCC	116	52
ATIC	TGAACCAGAGGACTATGTGG	165	50
ATIC	CTGGCGTCTAGTCTCCAAGG	196	44
ATIC	GACCAGATTCAAACCAAGAG	156	34
ATIC	AGTGTACTTGACAGCAATGG	202	20
ATIC	GACATGTTTGAAAGAGGCAG	171	14
ATP5J	TCCACAAAGAGTTTCTGTAT	260	361
ATP5J	CGTACCTTCAAATTTGAAGG	188	341
ATP5J	GAACATTGGTGTTACAGCAG	265	333
ATP5J	CGGCCCATAATGCATTGCGA	306	331
ATP5J	CAGCCGTCTCAGTCCATTTG	380	283
ATP5J	AGTATCAGCAAGAGCTGGAG	213	260
ATP5J	GACGGCTGACCGAATGACAG	203	201
ATP5J	CCTCCGCAAATGGACTGAGA	215	160
ATP5J	TGAAGTCATCGAAAAACCCC	67	135
ATP5J	TTCAGAGTATCAGCAAGAGC	97	118
ATP5J	TACTCTGAACTAGCATCAAC	106	100
ATP5J	AGACGTACCTTCAAATTTGA	70	86
ATP5J	GAATCAGCATGATTCTTCAG	149	57
ATP5J	TTACTTAACAGGACATCTGG	87	44
ATP5S	TCATTGCTTTGCGTCATTTA	462	777
ATP5S	TCCGAGTGGTTGCTGCGCTG	439	652
ATP5S	GTGCAAGTGTCATTATATCG	235	476
ATP5S	CTGACAGGGCGGCATCCGAG	308	431
ATP5S	GGGTGGATTATGATCGCATC	214	424
ATP5S	CTAGATCAAATGATGCCGTT	267	350
ATP5S	TATCTGGAGTCACATGACCA	158	328
ATP5S	GAGCAGCGACTCACCTGTGC	215	281
ATP5S	GGATGTTGGCCCTGACAGGG	252	278
ATP5S	GCTACCATGGCCAGGAGAGG	264	264
ATP5S	AAAATTTCCCAGCAGTTGTG	172	248
ATP5S	GCTCATGATACAAGAGTCGG	171	236
ATP5S	GGGGCCATGGTGCGCTACCA	226	234
ATP5S	GTGGCGTAAAGAAACTCCCA	179	227
ATP5S	CCAGAGGGCCTGTTGGAAGG	185	198
ATP5S	TCTTTACGCCACACAACTGC	106	162
ATP8A2	GCTCGGCGGGGGCCCTGTAC	393	708
ATP8A2	GTCGAGGATCCGCTCGTCCG	356	670
ATP8A2	GCGGTGCTGCGGGATAGCAA	233	590
ATP8A2	GGCAGTGGGAGACATTGTGA	308	528
ATP8A2	GTTGAGGTAAATGGTGCGGG	349	458
ATP8A2	CATGAGACCTGTTCCAGTAC	388	416
ATP8A2	GGCGAGATGCTGAACGGCGC	190	339
ATP8A2	GAGGATGAGGGAGTGGACCA	301	316
ATP8A2	AAGATTCCCAGAGTGAAGGG	204	294
ATP8A2	CCATCTGGAATACTTTGCCA	255	249
ATP8A2	CAAGCTGCTGACCTGTGCGA	230	246
ATP8A2	CAGCTGGTCTCCAACAGACG	196	228
ATP8A2	GTGTACCTCTTAATAAGATC	148	182
ATP8A2	GCTGGGCAAGGAAAATGACG	126	149
ATP8A2	ACACGACACCAAACTCATGC	40	63
ATXN3	CAAGATATGACACAGACATC	335	497
ATXN3	ACAGCAGCCTTCTGGAAATA	291	461
ATXN3	ATGAGGAAGCAGATCTCCGC	226	425
ATXN3	TACTTAGCTGAATAGCCCTG	237	410
ATXN3	CCCAAGTGCTCCTGAACTGG	267	334
ATXN3	CTGGTGGCTGGCCTTTCACA	265	328
ATXN3	TCAACAGTCCAGAGTATCAG	180	308
ATXN3	TGCCTGAATAACTTATTGCA	142	297
ATXN3	CGAGTGTTAGAAGCAAATGA	197	293
ATXN3	AGAGTTCACATCCATGTGAA	146	287
ATXN3	ATCCTGAGCCTCTGATACTC	180	287
ATXN3	AAGATGAGGAGGATTTGCAG	305	269
ATXN3	TAGAGTCCATAAAACAGACC	136	202
ATXN3	AATGTTAGACGAAGATGAGG	188	156
ATXN3	ATCCTCAATTGCACATCAGC	118	143
ATXN3	CTGTCATCCATATTTCCAGA	49	129
AUNIP	CATGAGGCGGACAGGCCCCG	363	494
AUNIP	GCAGTGGTTGAAGTGGCTAA	290	459
AUNIP	TCAGCGGCCATGAGGCGGAC	298	454
AUNIP	TGTGGTGGCCAGAAGTCTGG	409	443
AUNIP	GCCTGATTTGCTCTTTACCC	266	435
AUNIP	TTCTTGTTTGCTAGACCGAA	237	430
AUNIP	AAAATGCTAACACTCCTTCC	163	422
AUNIP	ACGCGGCGGCGCTGAAGAGG	282	408
AUNIP	CTGAAGATTCTCAAGGCCAG	288	378
AUNIP	ACCTGGCTGCAAGGTGAAGA	300	328
AUNIP	GTATGTTTGAAGGAGGACAG	165	262
AUNIP	CAAAGAAGAGCTCCATCTAC	202	258
AUNIP	CGCGTCCAGCCACACGCCGC	200	257
AUNIP	GAAACACACCAAACTACCTG	275	245
AUNIP	ACTCCTTCCTGGAGAAAGAA	117	217
AUNIP	GCTGAAGAGGCGGAAAGTGC	114	146
B4GALT3	TCATTGTGCCTCATCGTGCC	265	554
B4GALT3	GCAACATGGCGGGGTCCCCG	347	463
B4GALT3	GCCGTTGCTATGAACAAGTT	250	404
B4GALT3	GGCAGACCTTGAGGAGCTGG	337	302
B4GALT3	TATAAGATGGTGAAGCACCG	241	280
B4GALT3	CTGAGACTCCTCCGAAGTAC	201	273
B4GALT3	AGGATGACGACATTGCTACC	227	265
B4GALT3	GAATCCCCGGGTAGAACCAG	281	259
B4GALT3	CAACATGGCGGGGTCCCCGG	244	243
B4GALT3	GGTGGTAGAGCAGCAGGCGC	204	240
B4GALT3	GCAATGAGGAAAATCCCCAC	151	215
B4GALT3	GGGGCTCACAACCTGCAGGG	123	156
B4GALT3	GGGCTAAAGGACACCGACAC	157	147
B4GALT3	GCTGCTGGCGCTGCAAGAAG	162	128
B4GALT3	GGTTACTGTAGACATCACGA	95	66
BCKDHA	CGTCATCTGTTACTTCGGCG	260	467
BCKDHA	CCAGATCATCAACCCCAGCG	291	445
BCKDHA	GCATCCTCTATGAGTCTCAG	255	427
BCKDHA	ATCGCCGCGATACTGCTCAG	266	411
BCKDHA	CGCCAGATGCCTGTCCACTA	326	395
BCKDHA	GGTGTTTGGCCAGTACCGGG	273	380
BCKDHA	TGACAAGCCCCAGTTCCCAG	200	365
BCKDHA	ACGTACCTGCCTCCCGGTAC	223	339
BCKDHA	GGTAGCGATCGCTGCAGCGA	201	307
BCKDHA	TCTCACGTGGGGGTCCTCGC	134	301
BCKDHA	AGGCTGCCGCAGCAGCAGGA	292	270
BCKDHA	AATCCCCATCTACCGCGTCA	168	240
BCKDHA	GGGGATTCCAGAGATGACGT	159	227
BCKDHA	AGGGTCTGGCGGCTAAACCG	165	222
BCKDHA	CTTATCTATAAACTCCGCCG	101	208
BCKDHA	GGGCAGCCTGGCTCAAACCA	117	106
BCL11A	GGCACTGCCCACAGGTGAGG	309	500
BCL11A	GAGTGCAGAATATGCCCCGC	308	474
BCL11A	ACAGATGATGAACCAGACCA	291	442
BCL11A	AGAGCTCCATGTGCAGAACG	302	429
BCL11A	GTGCCAGATGAACTTCCCAT	262	381
BCL11A	GGATACCAACCCGCGGGGTC	237	372
BCL11A	GTGCAGAACGAGGGGAGGAG	381	343
BCL11A	GGCCCGTTGGGAGCTCCAGA	218	332
BCL11A	ATCTACTTAGAAAGCGAACA	251	318
BCL11A	AAAAGCATCCAATCCCGTGG	272	295
BCL11A	GATAAACAATCGTCATCCTC	185	237
BCL11A	TCACAGATAAACTTCTGCAC	138	228
BCL11A	TGTTTATCAACGTCATCTAG	114	198
BCL11A	GATAAACTTCTGCACTGGAG	194	183
BCL11A	CACAAACGGAAACAATGCAA	55	48
BDP1	GATGTGCCCACAGTCGATTT	438	518
BDP1	AAGAAGAGAAATATCCCCAG	325	510
BDP1	TACGTCATTGGATTATTATC	259	431
BDP1	GCCACAGGAAAATGGCCCAG	282	428
BDP1	ATTCGGTATCTGTCTGAGCA	161	311
BDP1	GGAGACTCCCGTCCACGCTG	143	287
BDP1	GAGTCCGTGGCAGGATCCGG	308	267
BDP1	AGAAGGACCCGCCTGAACAG	159	219
BDP1	AAGACTAGACACCTCACCAA	131	203
BDP1	AACAGTACTGAAAAGACTGG	103	173
BDP1	ATGCTATAAATGAAAGTCAG	162	162
BDP1	CTGGAAATGAGAGTTCCCCA	94	139
BDP1	TTAGCGTGAAGCCGAATGTC	126	117
BDP1	ACAGCTTCCAATCCCCAGCG	84	106
BDP1	CACTGACACTAGACTTAACC	72	76
BDP1	ATAAGGCCTGAGCTAAAGGA	133	40
BECN1	GAAGCTGTTGGCACTTTCTG	296	1603
BECN1	AAAGGAGCTGGCACTAGAGG	173	1566
BECN1	GAACCTCAGCCGAAGACTGA	214	1313
BECN1	CAGCTTCACTCTGATTGGGG	230	1288
BECN1	GCACACGAAGCTCACCTGCA	258	1231
BECN1	TCTGTGCATTCCTCACAGAG	283	1144
BECN1	TCCATTACTTACCACAGCCC	185	901
BECN1	GATCCAGGAGCTGGAAGACG	154	863
BECN1	GGAAGAGACTAACTCAGGAG	156	761
BECN1	CATGTCGGGCCAGACAGATG	235	741
BECN1	AGTGGCAGAAAATCTCGAGA	219	740
BECN1	CTGAGTTAGTCTCTTCCTCC	291	677
BECN1	CCTGGACCGTGTCACCATCC	221	555
BECN1	ATCTGCGAGAGACACCATCC	210	532
BECN1	ATTTATTGAAACTCCTCGCC	168	360
BECN1	GAAACCAGGAGAGACCCAGG	148	280
BET3L	ATCCACAGGGGTTACGGCAT	512	783
BET3L	TAACTCAGCTAGCCGCCCCG	291	554
BET3L	GGTTGCTTTCAAGATGTACC	379	521
BET3L	CAACCAGAGCTCCATAGGTA	450	442
BET3L	TTCCCATTACCATACGTGAA	364	353
BET3L	CACAGAGAAGATCGCCCAGC	143	289
BHLHE22	GGCCCGCGGGTCGGCTACTC	413	811
BHLHE22	GCGACCGTCGCTGTCGTCGT	394	660
BHLHE22	TGCTCGTAGGCGCCGAGCGC	334	656
BHLHE22	CTTGGAGAGCTTTCGCACCG	392	608
BHLHE22	TCCGGCGCTGAACGGGTAGC	268	465
BHLHE22	GCCGTACTTGAGGCAAAGGG	322	458
BHLHE22	GAAGAGGTCGTCCTCGCCGG	347	430
BHLHE22	CAGGGACAGGTCCATGCCCG	281	348
BHLHE22	GAAGCAGCCCAGGGGCGACG	335	320
BHLHE22	GGTAGCAGCAGCGGTAGCAG	194	309
BHLHE22	GCCGGCTACCCGTTCAGCGC	229	295
BHLHE22	GGTGGCGCGAAGGCAGCCGA	162	293
BHLHE22	ACATCAATGCCCGAGAGCGC	189	268
BHLHE22	TCCAATGCCCACCTCCACGG	175	261
BHLHE22	TCGGTGGCCGAGAGCAGCGG	199	252
BHLHE22	GGTAGCGGTAGCGGCAGCGG	122	36
BRE	ATTCGGTTCAAGGCCACTTC	573	700
BRE	GCCAGACCCCTCAGCTTTGC	248	622
BRE	GAGGTGACAAGTACAGCTTG	392	460
BRE	GACCACGCTAGATATGAAAG	299	433
BRE	CAGTTTAAATCGGTCACAGT	196	407
BRE	CTCCCCTTTCATATCTAGCG	179	359
BRE	AGTACTCACCTGCAAAGCTG	151	304
BRE	GGAGGGCCACATCTTCTCCA	231	291
BRE	TGAGGCGGGAGCTCTCCCGG	194	238
BRE	GATATGAAAGGGGAGAGCAT	193	225
BRE	TCTGGTATTCAAACATGAGG	143	154
BRE	AAGGATGTAAATGAAGACCC	122	152
BRE	TCTCCAAAGATAAAATCGGG	87	149
BRE	AAACTGCACATACCATATGC	90	83
BRF2	AGGGACGTACCTGCTGCAAT	444	600
BRF2	ACAGTATTTGCGTACCCCTC	182	321
BRF2	CGCGGTTGCCTACTACCAAC	176	290
BRF2	AGTTCTGCCAAGCACAGAGA	76	149
BRF2	TACCACTACCTTCAGCGACG	111	114
BRF2	GCTGTCTCGAACAATGCAGT	153	96
BRF2	GCCCTCGTCGCTGAAGGTAG	182	71
BRF2	GAGATTGCCCTCGTCGCTGA	75	71
BRF2	GCATAACTGGCCCCTAACAA	52	60
BRF2	GCAACTGCAGAACTCGACAA	64	56
BRF2	GTAACATATTCCCGAAGCAC	62	41
BRF2	GGCCAGGCTGCAAAAGAAGG	44	35
BRF2	TCGGCACTCTGGCATCCGAG	86	33
BRF2	CTGCGGCTGCGTGGTCACCG	112	26
BRF2	CTGTTGGTAGTAGGCAACCG	21	18
BRF2	ACCAACATTTGAGGATACCG	18	1
BSX	CTGGTGCTTTGGGTTCGTCT	394	712
BSX	TGGTGGTCTCCCTTATGCAG	435	697
BSX	AGAACGAGTGGAGCTGGCCA	237	524
BSX	GGCGTGAGGAGCCAAGAGGG	249	519
BSX	GCCCAAGCCGCTGAGAGAGG	407	501
BSX	CCTGCGTCTCGGACAGGCTG	363	420
BSX	CGGGTGCCTCTGCTAGACTA	200	410
BSX	CCCGAAATCAGGTGAAAACG	211	349
BSX	CCGCCGCCGCAAAGCCCGCA	232	316
BSX	TGCGGGTGCGGGAACAGCGC	193	308
BSX	GTGGGCCTCTGAGAAGACGC	222	304
BSX	CCTGTCCACGCCAGAACGAG	275	295
BSX	AAACCGTGCGGGCTTTGCGG	257	280
BSX	CGAGTCAGAGAAAACCGTGC	229	236
BSX	GGGTAGCCATAGTCTAGCAG	183	220
C10orf111	ATCCCGTCCAGTGTCCACTG	477	677
C10orf111	TAGCCTGAGTCTCCATTGCT	403	602
C10orf111	ATGGAGACTCAGGCTACCAT	291	451
C10orf111	GTCGGGGACAAGTGATGAAG	377	385
C10orf111	AGGATACAAAACCAACAGTG	201	379
C10orf111	TGGGGTAAAACACATGCCTA	227	369
C10orf111	TGGATCTGTTGATCTACCCT	295	365
C10orf111	CATCGGAGTCGCTGCAAAGT	310	339
C10orf111	CCAAGTAAGGCCGGAAAAAG	248	332
C10orf111	TAAAAGGGAGAAGGAGTATG	285	330
C10orf111	GGAGCAGCCACAGTGGACAC	258	295
C10orf111	GCTCCAAGCAATGGAGACTC	267	264
C10orf111	TCGGAGTCGCTGCAAAGTCG	189	252
C10orf111	GCAGATACGTAAAGAGGAAA	145	197
C10orf111	CGACTTTGCAGCGACTCCGA	166	168
C10orf111	ACAGTGAGGAGATTGAGAAA	168	162
C11orf84	TTGACTAACCAGGAAGCTCG	307	662
C11orf84	CACAGCTCGCTCGCACATCT	342	609
C11orf84	GACTTTCGCAGCACCAGCCG	288	552
C11orf84	CAGCGTCTGGGTTGGCGTCT	352	491
C11orf84	GCCTAGACCCAGCCCGCTAG	265	454
C11orf84	TGGTGCTGCGAAAGTCTCCG	294	402
C11orf84	CCAGGAAATAAGAAGCCCCG	204	372
C11orf84	GAGCCAGTCAGAAAGAAAAG	222	370
C11orf84	GCTGAAATGCGAGGAAGGGG	148	359
C11orf84	GAGCTGCAAGACGAAGCCGG	171	344
C11orf84	GCAGCAGCCCAGGAGGCAGC	223	304
C11orf84	AGCGGGCTGGGTCTAGGCGG	207	292
C11orf84	GGAGGCCTGGAGTGAAGGGG	205	280
C11orf84	GGGCCGGCTCCTTTTAGGGA	134	241
C11orf84	GGTGCTGCGAAAGTCTCCGT	145	210
C11orf84	GGACGAGGAGGAGGCCATGG	188	90
C12orf54	TTTTGTTCCTGATCCTGGCA	403	576
C12orf54	TGGTCTCATTGTCTCTTCTA	347	508
C12orf54	CTGTACTCACCTGGTCCCAC	274	492
C12orf54	AGAAGAGACAATGAGACCAC	219	411
C12orf54	ATGACATCAGCACCCAGGAC	310	375
C12orf54	TAGGGACACTTACCCAGTCC	271	331
C12orf54	ACAGCATCCCTGCCAGGATC	187	318
C12orf54	TGACCTCCAAGCAGCAGAGA	156	300
C12orf54	GGGGTCATCAAGGAATCTGG	165	258
C12orf54	TCTGGAGAGCAGCCATCAGG	178	243
C12orf54	AGAAGATTGCAGTTCAGCTC	79	150
C12orf54	TAACCATCACTGAAACCCTG	68	85
C14orf79	TCCTTGGAATAGTGATGTGC	285	566
C14orf79	GAAGTGGTTCTCGGTGGCTG	404	528
C14orf79	GAGGCGCTGAGAAGTAGACG	325	431
C14orf79	GGGGTTCTGTGGGTCCCTCG	367	425
C14orf79	GCCTCTCAGGTGCCACTCGG	352	403
C14orf79	ACAGTCCCTTGAACTCCTCG	243	384
C14orf79	GCCTTTGAGTGACCTCCAGG	373	368
C14orf79	TTATGTACACGTTCAACGCC	283	326
C14orf79	GCAGAAGTTCCTGTCACCCA	245	320
C14orf79	CTCCGCATGAGGGGGTCTTC	200	300
C14orf79	GAAAGAAGTTCTCCTGGCAA	214	298
C14orf79	GGTCACAATCTTCCATGATG	189	226
C14orf79	GCTCCAAGATGCAAGGCCGG	158	224
C14orf79	AGTTCTCACCAACCATGCCA	79	173
C14orf79	CGTCTACTTCTCAGCGCCTC	181	161
C14orf79	GTAACGAATCCAGAAAACTC	68	62
C16orf72	GGGCAGCTGCTCGTCCTGTT	385	728
C16orf72	AGATCATTCTGTTGCGTTTA	383	650
C16orf72	CTTGTGCTCGGGCTGCGCGG	213	418
C16orf72	GTAGAGCTGGGCCACGGCGG	333	388
C16orf72	TAGTTTCCGTTGAAGTAGCT	332	374
C16orf72	TGGCTATCAGCGACGCAATA	245	365
C16orf72	GGAGCTCTAGAGTTTCGTGG	222	322
C16orf72	GTAGAGATTGGTGACGGCGG	260	269
C16orf72	AGCACAAGCAGCAGAAGCTG	287	259
C16orf72	CTGTAATGACATCGCCACAC	140	247
C16orf72	CCAGAACTCGGCCACCGCCG	222	245
C16orf72	GGGACCCAGAGAGAAAGTCC	167	157
C16orf72	GCCGTCACCAATCTCTACAA	139	103
C16orf72	GCGGAGGATGGAGGAGCGGA	108	73
C16orf72	CGAGCTGCAGGAGGAGGCGG	106	71
C16orf72	GGAGCGGAAGGAGGAGGGCG	176	41
C17orf102	AGCCAGTGCCCAGCGAACTC	269	589
C17orf102	AACGCAGCTGAGGGAGGTGG	412	575
C17orf102	CCAGTGCCCAGCGAACTCTG	309	550
C17orf102	ACCTACAATGCCTGTGATGT	231	398
C17orf102	AAAACACCTCCGGCGCCCGG	296	368
C17orf102	GACTGCGGTGGCGTCTACCC	328	368
C17orf102	ATTCGGGTCCCAGCGCTAGC	142	331
C17orf102	AGGAGCTGGGCACAGCAGCG	259	290
C17orf102	GGAGCGTGCATCCTTTGAAA	211	279
C17orf102	ACCCTGGAGAAACGCAGCTG	153	251
C17orf102	GAGCGGCTGCAAAACACCTC	216	247
C17orf102	AGGGACATCAGTGACTGCGG	232	234
C17orf102	TCTGGGGCTCAGCTTCGTGC	116	206
C17orf102	GGTTTCCCACAGCTGCGCCC	154	166
C17orf102	GTGCATATCTCCAACATCAC	215	156
C18orf8	GACCTCCAACAGCACAGGAG	261	1256
C18orf8	ATCGAGCGGGAAGCACGGGG	225	1243
C18orf8	CCAAAGGTTTGGAGTCGCTG	254	980
C18orf8	AAAGTTTGCCCTGAACGTGG	213	979
C18orf8	CAACTGCGTCTTCTTCGATG	305	956
C18orf8	CAGCAAGATCACGGCGCTCT	412	952
C18orf8	ATCATTATCAGCGCAAGCCA	178	849
C18orf8	GCTACTGGCGTGGTAGTTAA	313	839
C18orf8	GCGGCCGGTGCAGTTCGAGA	215	838
C18orf8	TCAGAGGACCTCAAAGACTG	222	792
C18orf8	ATAGGAATCCCATCTCATTT	293	638
C18orf8	AGTTTCAGACTCCGTTTCTC	356	552
C18orf8	CGTGCATCATCAGGATACAG	148	496
C18orf8	AGCCATTGCGATGTCTCTTT	336	494
C18orf8	TTCCGAAAGAGACATCGCAA	144	483
C18orf8	AGCGAAACCAGCGTTTGCGA	103	215
C19orf57	GGGCTGTTTACATCACCCTG	368	468
C19orf57	GAGCTGATGCTGGGGTACAG	376	375
C19orf57	GTGATGTAAACAGCCCAACA	107	301
C19orf57	AACCAGGAAAGGCCGTCTCC	288	285
C19orf57	GAAGGGGAGAAGCCAGACAG	275	273
C19orf57	GAAGGGACTCATAGCAGCCT	154	261
C19orf57	GACAGGGTTCCAGGTGACGG	278	258
C19orf57	GGAGGGGCCCAAAGGACAGC	210	223
C19orf57	TGACTAAGAGGAAGAAGCTG	221	211
C19orf57	GTTTACAGAACTCATTCGGG	255	209
C19orf57	GCTCCTCCGTCAACCAGAAA	150	187
C19orf57	GGGATGCTCCTCCCTCGGGA	186	184
C19orf57	CAAAACCCCTAAAGAACCCA	70	152
C19orf57	CCTACATAGCTCCCCTGATG	226	151
C19orf57	GGGAAGATAAAATGACTAAG	116	146
C19orf57	CCATAGAAGTCTCCTAGCCT	58	136
C1GALT1C1	AGCCCAAAGACTCACATCTT	404	871
C1GALT1C1	GGACACATTAGGATTGGTCA	308	693
C1GALT1C1	TCATTGTCAGAACCATTTGG	288	629
C1GALT1C1	GGTCTCCAGATTTTATAGTG	345	569
C1GALT1C1	TATGCCCAAATGCCCTAAGG	380	553
C1GALT1C1	GTAGGTGATGATGCTCATGG	390	473
C1GALT1C1	GTATACCGCCTTAGGGCATT	291	446
C1GALT1C1	ATCATCACATGCATCTGATT	240	355
C1GALT1C1	AATGACTTATCACCCCAACC	217	335
C1GALT1C1	GAAAATGCAGAAGATGCTGA	204	329
C1GALT1C1	TGTGCTTTGATCACTATGCT	294	323
C1GALT1C1	CAAATCATCCCTCCCTGTTC	293	310
C1GALT1C1	GAAAAGTGTCCTGAACAGGG	149	304
C1GALT1C1	GAATATGTGGGTATGGAAGG	152	276
C1GALT1C1	GGGCTGCAGTAAAGGAGACT	177	270
C1GALT1C1	GCAGTTTGCCTGAAATATGC	107	172
C1orf86	CGCGGCTGGGGTTGAGCCGC	334	921
C1orf86	AACCAGGGGCGGCCGCCAGA	346	593
C1orf86	ACCTGGGGGCGAACTCCTTC	382	466
C1orf86	GTGAAGGCACCTCGTGATCC	325	428
C1orf86	TACCGGCTGCTTCACGGGGC	321	368
C1orf86	GCCGCGGCACCCTCCACAGA	265	363
C1orf86	GGGGCCCGGGCCGTTCCTAC	255	332
C1orf86	TTCCTGGACACCCTTTCCGC	167	281
C1orf86	GGCGCGGGCTTGGATGGAGG	297	259
C1orf86	GTGTTGCAGGAGCCCAGGTG	225	253
C1orf86	GCAGCCGGTAGGAACGGCCC	275	235
C1orf86	ACGGCTGCTGCTCCACCCTG	290	221
C1orf86	GCACATGGGGCAGCTGCGCA	177	207
C1orf86	GTGAAGACTTCAGTGGGCTC	127	184
C1orf86	GCCCTGCAGGGATCAGGTGC	164	180
C1orf86	CGGCGGCTCAACCCCAGCCG	141	174
C20orf197	ATAAGGGCTGTGCTGAAACA	291	661
C20orf197	TAGCCGTCTGCCTGCCAATA	442	612
C20orf197	CTGGACTCACCTTCAGCCTG	343	462
C20orf197	CCATGACACAAGACGCTCCA	248	356
C20orf197	TTCCAAAACCTACTTGCCCG	234	353
C20orf197	CGGGCACAGCCACAGGCTGA	274	337
C20orf197	TGTCATGGGACAGTGTGGGA	376	334
C20orf197	TTATGGACTAAGGTGTCCCA	292	319
C20orf197	ACGGCTACGGGCACAGCCAC	192	316
C20orf197	CATTGGATCAAGCCAATCCA	251	262
C20orf197	TTCTGCACCAAATAAACCCT	232	260
C20orf197	TATTGGCAGGCAGACGGCTA	153	254
C20orf197	ATTGGATCAAGCCAATCCAA	76	142
C20orf197	CATGACACAAGACGCTCCAA	117	105
C22orf31	GCTCAGAGGGACCGGTTCCC	302	598
C22orf31	GCAGGGCATAGGAGGCCTGC	264	518
C22orf31	AACAGTCCGCCAAGATCTTG	459	458
C22orf31	GCAAGCAGCCAGCAGGGCAT	275	454
C22orf31	TGTTCTGGCCATCCAGATGT	333	426
C22orf31	TCTCCAAACTTGCATGGTGG	229	425
C22orf31	GTTCTGCTTTGCACATGTTC	284	386
C22orf31	CACTGTCCTGGGGTAGCGCT	211	356
C22orf31	GAGGAAGTGGTAGCTGGTGC	255	328
C22orf31	AGTGATGAAAGCCACCCAGC	176	323
C22orf31	GTCCATAGATAGGGATGCTG	306	274
C22orf31	CCTGAGTACAAGCTTAACCA	134	227
C22orf31	GCCTGAGTACAAGCTTAACC	121	214
C22orf31	TGCCACCCAAGCGCTACCCC	201	214
C22orf31	TACAACTTCCCAAGAGGAAG	116	199
C22orf31	GGCTCTCACCAACATCTGGA	115	190
C3orf27	GTGGGTACAGGGCCCAAACT	408	768
C3orf27	CCAGAGCTTGATGTCTGGGA	385	654
C3orf27	ACAGTGGCACAGCAGAGTCC	367	572
C3orf27	AGGCGGGAGACGCTGAGTCT	293	438
C3orf27	GGAAGCGCTCCATCAGATAG	310	412
C3orf27	TCTGGCACCAGAGACACTCG	348	364
C3orf27	AGAGATGACGAGCTCAGGCA	243	341
C3orf27	GAGTCTAGGCAGGCTCGTGC	224	305
C3orf27	GCTGTGTTCCTTGAAGCCGT	274	265
C3orf27	CCACCCACTACCATTTGACA	107	258
C3orf27	TGGAAACCAGCTCACTGCAG	103	214
C3orf27	GGGTGAGGAAAGGCCCACAG	189	191
C3orf27	AAAGTTGCTCAGAGGCTCTG	154	139
C3orf27	GCTGTCACCAGAGAGCCCGA	70	73
C3orf27	CTAGAAGCTTCCAACCACCC	101	55
C4orf32	CGGGGAACGCGACGAGGACG	363	619
C4orf32	TTGTGAAGCCCATGTTGATA	280	604
C4orf32	GCTCAGCCGGGGAGCTGCTG	361	599
C4orf32	AGGGACCGGGTGGGATCCCG	338	576
C4orf32	AACCACACTGGTGAGCCGGT	258	441
C4orf32	GTCCAAGGGCTTGCAGGCCA	284	384
C4orf32	TTCTTGTAGTCATCTCCAAC	223	367
C4orf32	GCGGCCGAAGGAGAGCGAGC	174	320
C4orf32	GGCGGGGAACGCGACGAGGA	202	263
C4orf32	GCGCCGCCGCGGGCTCGCCC	176	228
C4orf32	AAGAACAGCAACTAGTCCAA	170	226
C4orf32	GGCTGCGGGATGTGCTCAGC	218	226
C4orf32	CTGCGGGATGTGCTCAGCCG	175	216
C4orf32	TTATCAACATGGGCTTCACA	83	151
C4orf32	GAAGACTCACAGAACCACAC	81	98
C6orf10	TTTGTGTTGAATATGCATGT	441	613
C6orf10	ATACTTACTTATGGGTGCCA	303	549
C6orf10	GCACTGTCTCGATCAAGTAT	227	522
C6orf10	TGGCAAGTCCCAGTAGAGTC	260	465
C6orf10	ATGGCATCTAAGTTCTCCCT	287	464
C6orf10	TCTACTGGGACTTGCCATCC	267	450
C6orf10	GGCAGCTTACCAATAGGTCC	284	400
C6orf10	AAAGCACTTACCTAGAGAGT	280	359
C6orf10	ACTTTGTTCTGAACTGTATC	212	346
C6orf10	TGGGCACGATGTAAGCAAAG	243	329
C6orf10	GGTCCACCTTCAGCACCCCG	224	259
C6orf10	GACACTTCATATGATAACCG	156	243
C6orf10	AGACTTCTGGACTATGAGGA	187	242
C6orf10	GTACAATATCCTGGATCCAA	145	206
C6orf10	CATGCATATTCAACACAAAG	78	129
C7	GGTGATAAGCTTATTCATTT	369	599
C7	CAGTCCTGTGAACCTACAAG	335	538
C7	AAGGGGCATAGAAGTCCCAC	339	510
C7	GCTGTGTATGGGCAGTATGG	300	482
C7	AAGTCCCACTGGCAGTTGAC	349	457
C7	AAGAGGATGTCCAACAGAGG	221	435
C7	TGTAGTCATACAGAGAGGGG	253	431
C7	ATTAGTCACAGATTCTGCCC	241	409
C7	GATGTGGAGAAGATTTACGG	323	404
C7	GTCCTCACCTTGAAAAACTT	233	374
C7	CCTCTCCAGTCAACTGCCAG	250	354
C7	CAGCCATTGCATTCTGACCA	306	331
C7	GGTTTATCGATATCACAGGA	205	323
C7	GACAAGGCCGGCAATGACAG	257	317
C7	GAGCCACAGAGAAATGCTGA	182	310
C7	GCCCCTTGGTCAGAATGCAA	90	122
C7orf25	TGAGCGTGCCTTGAGACTAG	328	679
C7orf25	TGAGGGTTGCTATACTGCAC	230	654
C7orf25	GAAATGGGCATATCTGTGAG	378	578
C7orf25	AAAGCTGTGCAGCAAATTGA	223	573
C7orf25	GCAGGTTCTACCTCAGCTGG	295	518
C7orf25	TGAGAGTGAATCAGATGATG	300	452
C7orf25	TGAGATTTCCCGGCGGGTCC	342	417
C7orf25	TCGCGCGGGTGGAGCCGCCT	228	401
C7orf25	CCCACCCCGCTCGAACGCCG	205	396
C7orf25	AACCGCGAGCGCGAGCACGC	329	392
C7orf25	GTAGATGTAGTTGCAAATGG	370	372
C7orf25	GCTGCTGGTGACTGGCCTGG	265	310
C7orf25	GTCAGAGCTGCAAACAACCA	183	294
C7orf25	TGAACGAATCGCCATAGCCA	157	272
C7orf25	AGAAAAGGTGGCATAGAAGG	176	248
CA5B	TTTGCCGTCAATTAAGCATA	353	704
CA5B	TTCCGAGATTCATGCCAGCG	381	555
CA5B	GTGACAGACTCGGAGAGGGG	319	527
CA5B	AAGCAGTTCCATTTTCACTG	318	473
CA5B	CAGCAAATGCTTCCCAGCAG	216	445
CA5B	GCCATTTTAGTGATCAAGGG	253	425
CA5B	AGTACCTTATGCTTAATTGA	159	376
CA5B	AATCGGTAGTTGTGTTCCAG	296	348
CA5B	TTCTCCTAGTGCATCCACTC	235	339
CA5B	GTAGGTCCAGTAATCTGGGC	251	325
CA5B	TGTACTCACAGGCTCGGTTC	300	293
CA5B	CTGGGGTTCTGAGCACACCG	266	269
CA5B	GGTGGTGATGAACAGCCTGA	175	230
CA5B	TAGAATCTTCAAATTCCACG	120	175
CA5B	TGGGCAGGTAGGCATCAGGC	199	137
CA5B	CAAATGACCCAAATTCCACA	79	104
CAAP1	CAGCAGTGCTTCTGTATTAT	442	639
CAAP1	ATGGAAGAGGAAGCAGATGA	316	350
CAAP1	TTTATAAGGTGACAATGGAA	196	327
CAAP1	CGAAGAAGCAGCTGCTCCCG	237	308
CAAP1	ACAGGAGCTCTAACTGTTCC	232	303
CAAP1	GCTGCTAGAACTTGAGATGA	190	286
CAAP1	TGAAGTACCTTTAACACATC	185	280
CAAP1	TGGTGGAGGAACAGCCAGGG	237	252
CAAP1	GCAGATGATGGTTCTAAGAT	207	249
CAAP1	AGAGAGAATAAGCAACCTGA	116	235
CAAP1	CGAACCCAAAGCAGCCACCC	221	202
CAAP1	AGAAATTAAAAAACTATGCC	108	192
CAAP1	AATGGACTCTGATATGGAAG	155	152
CAAP1	GAAGGTTGAACATCTTCTGG	167	124
CACNG3	GTTACGAGCCAAATCCCACT	254	606
CACNG3	ATTATGAGGATGTGTGACAG	287	542
CACNG3	ACACAACGTCATTCTCAGCG	194	498
CACNG3	GCAGCGTGACACTGAGGATG	336	462
CACNG3	CTACAGTGGTGATCAACATC	289	444
CACNG3	TGACCCATTCGGGGCTGTGG	304	434
CACNG3	GTCACGCTGCTGTTCTTCGG	304	409
CACNG3	GAATGACGTTGTGTCTGCTG	299	407
CACNG3	GTAGTCCGTGCCCACTGCAA	372	328
CACNG3	CGATTTTCTTGCACACGCCT	118	260
CACNG3	GACTACTGGTTATATTCCAG	274	249
CACNG3	CAAGTGATAATGAAACCAGC	142	211
CACNG3	TGAAGATGCTGACTACGAAC	142	190
CACNG3	AGCGAGAACTTGACCGCCTC	149	116
CACNG3	GAGGATGGGGAAGACACTGG	162	58
CALB2	GATCGCGTTAAACTCCTCTG	355	543
CALB2	ACAGGAAATGGGTATATTGA	236	529
CALB2	CTCCAGCGCCGAGTTTATGG	409	495
CALB2	AAGTACGACACAGACAGGAG	323	460
CALB2	CTGCTGCTGCGGGCCAGCCA	304	447
CALB2	GCTGACGGCGTCCCAGTTCC	296	440
CALB2	GCTTGGGCTCATCGTACGGC	175	373
CALB2	TGGGAAAATCGAGATGGCAG	277	357
CALB2	TGGCCTCACCTCCATAAACT	191	318
CALB2	GGGCATGAAGCTGACCTCAG	240	315
CALB2	GGGCTCCAGCGCCGAGTTTA	256	297
CALB2	TGGGCCTCTCAGAGATGTCC	227	251
CALB2	GGCAAGGAAAGGCTCTGGCA	229	246
CALB2	ACGGATGTTTGACTTGAACG	164	238
CALB2	GGGACGCCGTCAGCTCGGCC	206	173
CALB2	GAGAAGGCAAGGAAAGGCTC	160	119
CAMK2N2	CAGATCGGCCGAGCCAAGCG	452	774
CAMK2N2	GAAGGAGAGGTCGGAGCCCT	395	747
CAMK2N2	GCCGCGTACCTCGCTTGGCT	431	650
CAMK2N2	GGCCGATCTGGCCCAGCTTG	359	545
CAMK2N2	CCTCGGGGTCTGCGCCGAAG	318	493
CAMK2N2	GAAGACAAGATGGGCCGCTT	342	446
CAMK2N2	CGCTTCGGCGCAGACCCCGA	277	441
CAMK2N2	GTAGGGCAGGATCTCGGACA	296	422
CAMK2N2	TCTTGTCTTCGCTGTAGGGC	325	422
CAMK2N2	CCTTCAGCACGTCGTCTATC	334	398
CAMK2N2	GTTGCCCGCGAAGAAGGAGT	282	332
CAMK2N2	CCGGATAGACGACGTGCTGA	312	322
CAMK2N2	CTCCTTCTTCGCGGGCAACC	180	320
CAMK2N2	GCAGGCGGCAGCTGAAGGAG	206	275
CAMK2N2	CGGCGCGTCTACACTCCGGA	175	262
CAMTA1	TGGGACATTACCTTGTCTTA	346	614
CAMTA1	CACGGTGTTGAGAACACAGT	439	478
CAMTA1	AGGCTTGCCGCAGTCCTCGA	335	477
CAMTA1	CCTGAACGTGCCGGCCATCG	432	476
CAMTA1	GCACCGCTGGAACACTAATG	292	380
CAMTA1	AACACCGTGCCACCTATAGA	321	374
CAMTA1	GAGGAGGATGTGGCGCGCGG	276	368
CAMTA1	GGAGCCAGTAGCACCTCCGG	352	366
CAMTA1	TACCAAAAGAGAGGCACCGC	218	298
CAMTA1	CTACCTCATTAGTGTTCCAG	239	274
CAMTA1	GTTCAAGTTTACCAAAAGAG	113	242
CAMTA1	GTTTCCCAAAGTGTATTCTG	187	214
CAMTA1	CAAATCCTACCTTCTATAGG	164	205
CAMTA1	TAACCACCTCCCCTAAGACA	108	167
CAMTA1	GCTGCCGAAAACAAGCCGGA	186	151
CAMTA1	GTGGTGGTTGGGGCCAGCGG	181	108
CASC4	ACAATAATACCTTTCCCATG	296	506
CASC4	CTGAAGCAGGACGTGGCGGG	310	503
CASC4	GAAGAGATGCGAGGATGACA	244	476
CASC4	CATCATTTGATTGAATCTTT	252	386
CASC4	GGAGATGCTCCAGTAGTTGA	298	385
CASC4	GAAACAGATCGACCAGAAGG	227	369
CASC4	GATTCTGTTTTGAAGTACCG	240	341
CASC4	TGGGTTTCGGGGCCAACCGG	370	338
CASC4	GCAACTTGCTGAGCTTCGTC	156	298
CASC4	CCAGCACGAGAGAGGGCAGG	223	274
CASC4	CAGCGCACCGAAGTGGCCCG	157	157
CASC4	TCAAGCAATCATATTCCACA	72	142
CASC4	CATATTCTAACCTCTTCACA	73	126
CASC4	CGTGCTGGTGGTGCTGCTGG	113	121
CASC4	GCAGAACAAATCAAAAGAGG	85	100
CASC4	GAACAACATATCGTATCAGA	72	46
CASP12	ACAGATGAGATACACCTTAT	409	947
CASP12	GTAGATCTCGCATCCCCAAA	277	620
CASP12	CGAGATCTACTTGAAAACCT	273	572
CASP12	GAATCTGTGGGACCAAGCAC	238	398
CASP12	TCTCAGTGATATCATCAACC	162	330
CASP12	CTGATCAAGACCTTTCTAGA	211	314
CASP12	GGAATGTGCTGTCTGAGGAC	277	313
CASP12	GCATCCTGAATGGAATCTGT	139	311
CASP12	CTGAAGCCACTCACCAGCCA	107	260
CASP12	GGTGAGCAATGCTGAAAACC	260	259
CASP12	CATGTGGACCAGAACACCGT	175	253
CASP12	GAGTCTGAAAGACAAACCCA	180	249
CASP12	AAAGCCGGTGCAGATACTCA	150	195
CASP12	ACAGATGAGAAACCATCCAA	246	188
CASP12	TGAAAACCTTGGATACTCAG	128	164
CASP12	AACTATCTTCATAATCGAAA	65	27
CATSPER3	CATGTACATCTTCGCTATCT	376	626
CATSPER3	TATGTCATAACTGGTCCACA	323	575
CATSPER3	GCAGACGCTGATCACCGCCG	313	515
CATSPER3	GTACCGTGGCCAAGCTGAAG	353	407
CATSPER3	GTTTGCCCATGAGCTGGCGG	291	383
CATSPER3	CGATAAGCTTGAGGATGCGC	284	379
CATSPER3	GAAGAACGGCTACAACCTGC	132	350
CATSPER3	TGTGGACCAGTTATGACATA	184	334
CATSPER3	GGAGCAGCAGGAGATGCTCA	206	312
CATSPER3	GGGGCAGACAGTCTACACCG	251	300
CATSPER3	GATAAGCTTGAGGATGCGCA	170	279
CATSPER3	AAGCTTATCGGCTATAGCCA	287	220
CATSPER3	GCATGCCATCAGCGATATAC	153	200
CATSPER3	GAAGAGCAGGAGGAGCACAG	204	132
CATSPER3	ACATGAGGAGGAAGAGCAGG	195	105
CC2D1A	CCAAGATGCGGCGCTACGAT	415	532
CC2D1A	CCTGCAGGCGGAGCTAAATG	333	521
CC2D1A	GCGGATGGAGCGGTACCAGG	210	477
CC2D1A	GGAGGCTGATGATGACCTGC	269	454
CC2D1A	GAAGTGTCTAGCGGCAGCAG	406	411
CC2D1A	CCGATCGTAGCGCCGCATCT	327	382
CC2D1A	GAGTTCACCATAGCGCCGGG	297	363
CC2D1A	GCAGCCCAGGCCAAGAGCAA	294	352
CC2D1A	GTCTTGGAGGCCCTGAGCCG	249	351
CC2D1A	GCAGCCACCGTGGCTTCCGA	200	306
CC2D1A	GCAGCTGCAGTTCTACACGG	225	282
CC2D1A	GGAGGCGCTGGAGCAGCGGA	243	271
CC2D1A	ACCGCCAGGTCCCTTGCCGA	318	270
CC2D1A	CCAAACTGTACCTGGGCCAC	124	240
CC2D1A	CAGGTTTGAAAAGTTGGCGG	167	230
CC2D1A	CAAGGGCATCAAGTTCGAAG	116	187
CC2D2B	AAACAGTAGTTACGATTCTT	365	628
CC2D2B	CACTGCATCAGTTTAGCTAT	357	563
CC2D2B	TGCTCTTCTGCAACAATCTG	310	510
CC2D2B	GCTAAAGCAAATTCTGTCTG	168	407
CC2D2B	CTAACACTGACGTTCCCAAG	223	402
CC2D2B	ATCAATGTATGGCATCTGGA	213	401
CC2D2B	CACTGTCTCAAGAGCTGTAG	272	380
CC2D2B	GTATTTTGGAAAGAAGGCAC	200	290
CC2D2B	GTAGTTACGATTCTTCGGTT	223	270
CC2D2B	AAGATACAAATCGAGCAATG	209	267
CC2D2B	GACTCTGAAGAGTAAAGTGA	190	238
CC2D2B	AAATCCACCTCAGCAACTTC	144	233
CC2D2B	GACCTAAACACCCAACACAT	82	133
CC2D2B	CTTAGTCACAAGATATATCA	166	119
CCK	GGTGCCTCCCGCAGATCCCG	351	475
CCK	GGCGAGTCCCGAGCGCACCT	309	464
CCK	GGCTGGCGCCCTGACGCAGC	229	367
CCK	AGGGTATCGCAGAGAACGGA	204	355
CCK	CCATCCAGCCCATGTAGTCC	258	337
CCK	TGGCGAGTCCCGAGCGCACC	285	327
CCK	GCTGGCAAGATACATCCAGC	200	286
CCK	ACGATGGACATTCGTCCAGA	151	278
CCK	ATCTTGCCAGCAGGGCGCCC	200	266
CCK	CATACTCCTCGGCACTGCGA	206	247
CCK	GTACCGCCATCAGCACGCAC	126	245
CCK	GTTCTGCAGGTTCTTAACGA	142	227
CCK	GGGAGGCACCGGCTGCGTCA	228	222
CCK	GGCGCCCCGTAGGCAGCTGA	249	219
CCK	CTCGCTACAGCCATGAACAG	136	80
CCZ1	AGATGAGGAGATCATTGTGA	344	1103
CCZ1	GAGGCCAGCACTGTGAGCTG	303	948
CCZ1	TGGAATCAGCTTCTTCCCGT	251	740
CCZ1	GCAGTGCTACAGCATGTACA	354	732
CCZ1	CTGAAAGCCATGGAAGACGG	183	719
CCZ1	TCCAAGGCACATCGAACCTG	330	701
CCZ1	AAGCTATTGTACAGTTTACA	313	618
CCZ1	AATGAGAAGATTAGAAATGT	179	588
CCZ1	TGGTACATTTCTGAAAGCCA	163	582
CCZ1	GCTGTGTGCTTTATGATCGA	259	549
CCZ1	TTGGAAAGAAGTCTGATCGG	226	505
CCZ1	GCAGGACAAGGTTTATAGCT	266	428
CCZ1	GTATTTGCAGTTAGCAGGAA	247	358
CCZ1	ACATCAACAAGAGGATGTCC	182	278
CCZ1	ATTGAAAAACAGAGTAAAGA	63	167
CCZ1	TCCTCTTGATATTCAATAAC	106	114
CCZ1B	AGATGAGGAGATCATTGTGA	344	1103
CCZ1B	CCGGGGCGGGATGGCTGCAG	259	990
CCZ1B	GAGGCCAGCACTGTGAGCTG	303	948
CCZ1B	CCGCATACCTGTCCTTCGCG	280	894
CCZ1B	GATGTGCCTTGGGAAAAGGG	153	872
CCZ1B	TGGAATCAGCTTCTTCCCGT	251	740
CCZ1B	GCAGTGCTACAGCATGTACA	354	732
CCZ1B	CTGAAAGCCATGGAAGACGG	183	719
CCZ1B	TGGTACATTTCTGAAAGCCA	163	582
CCZ1B	GCTGTGTGCTTTATGATCGA	259	549
CCZ1B	TTGGAAAGAAGTCTGATCGG	226	505
CCZ1B	GCAGGACAAGGTTTATAGCT	266	428
CCZ1B	ACATCAACAAGAGGATGTCT	281	371
CCZ1B	GTATTTGCAGTTAGCAGGAA	247	358
CCZ1B	ATTGAAAAACAGAGTAAAGA	63	167
CCZ1B	TCCTCTTGATATTCAATAAC	106	114
CD164	ACCTGATGTAGTAACTGTCT	427	744
CD164	AACAGTTAGTGATTGTCAAG	328	684
CD164	AACACGACAGACTTCTGTTC	355	658
CD164	TCCAAGACAGTTACTACATC	284	592
CD164	GTGCCAACAGCCAATTCTAC	243	484
CD164	GAGCACGCCCAGGCAGGTGG	279	420
CD164	GCGCTGAGGACACGATGTCG	158	383
CD164	CAGTTAGTGATTGTCAAGTG	281	327
CD164	CTCCAACGTAACCTCGGCGC	128	295
CD164	GCGCTAAAGTCGTCACGTTC	298	283
CD164	AACTCCCCAGAAACCTGTGA	193	154
CD164	GGCGGCCCAAAGCAGTGAGC	200	150
CD164	GCAGCTGTTTCGACCTTCAC	125	127
CD164	CCGGAGTGGTGACCAGCGGG	124	123
CD164	ACAGCACGCAGAGCACGCCC	95	89
CDC40	GCCGTCTCTAGCAGTGGCAG	252	514
CDC40	AGCCATTTGCTGTGTCCTAA	337	497
CDC40	GCAGTGACTTTGTCTCCAAA	225	418
CDC40	GGACCCTGAACCCGAACCAT	356	371
CDC40	CAAGTGTCTGCTAAATATAT	226	283
CDC40	AGGGAGTCGGCGGCTGGCAG	292	267
CDC40	ACTTGATGATTATCTAATGA	212	259
CDC40	TTGGACCAGAAAATCCCTTT	218	238
CDC40	AGTGGACTCGGCTCCGGAGG	159	211
CDC40	CAAGTGCATGAGGGAGTCGG	147	204
CDC40	TGAGACCATGTTTGCTCCTG	160	195
CDC40	ATTATACTGAACTTCTTTGA	181	167
CDC40	GCAGCTCTGGCCGCTTCCTA	195	133
CDC40	TGGATGAAATCACAGCAAAG	51	72
CDC40	AGATTAACACCAACATCCTG	71	67
CDC40	ACAGGAAGAAGAGAAACCTG	43	39
CDC42	ACTAGAAATACATCTGTTTG	359	636
CDC42	ACTTGACAGCCTTCAGGTCA	301	572
CDC42	TCAAAAAGTCCAAGAGTATA	286	532
CDC42	TATGCAGTCACAGTTATGAT	343	446
CDC42	GACAATTAAGTGTGTTGTTG	266	343
CDC42	TGAGTCCCAACAAGCAAGAA	259	330
CDC42	CTTTTGGGTTGAGTTTCCGG	252	288
CDC42	AGAAAGGAGTCTTTGGACAG	315	213
CDC42	AAAGCTGGCCCGTGACCTGA	216	213
CDC42	AAGTGTGTTGTTGTGGGCGA	296	194
CDC42	GGAGTGTTCTGCACTTACAC	129	167
CDC42	ACAGTCGGTACATATTCCGA	157	104
CDC42	CAGAACCGAAGAAGAGCCGC	134	94
CDC42	ATTTGAAAACGTGAAAGAAA	50	45
CDC42	GCAGTCACAGTTATGATTGG	186	40
CDH23	GATACCGCGGGCGCTGTCAA	339	536
CDH23	TCGGGGAGATGATGAAGTGG	437	517
CDH23	CCATGTCTTGGGCCAGCAAC	319	480
CDH23	ATGGTGTAGCCAATGCCCCG	261	433
CDH23	TGAGAGAGTGACCTCATAGG	321	376
CDH23	GACCAAGTCAGAGTTCACCG	229	371
CDH23	GCAGGTATGTATCAAAGAAG	219	356
CDH23	GATGATGGCCAAGTTGGCCA	280	312
CDH23	GTTCTCTGTCAGCGACCACC	168	308
CDH23	GGCCTCTCGCTTCTTTGCAG	278	289
CDH23	CCAGACACGCCAAACACCAG	203	279
CDH23	TTCGCCATTGACAGCGCCCG	180	275
CDH23	GGATCACCTACTACATGGAG	245	247
CDH23	CCCCAGACACGCCAAACACC	127	215
CDH23	GTCGCTGACAGAGAACTCCA	173	171
CDH23	GGATGAGGGCCTCAACGGGG	174	159
CDHR1	GGAGGCGCAGCACACCGCTG	284	467
CDHR1	AGAAAAGACGCTTCTAGTGC	218	421
CDHR1	GGCTTATCTACACCCAGCCC	311	399
CDHR1	GAGACATGAGGCGCTGCCGG	245	392
CDHR1	TCTCACGTATACACCCTGAA	201	378
CDHR1	GAATCCTGGCAACGTAGTAG	287	369
CDHR1	AGAGGAACCCAACAACCTGG	252	356
CDHR1	GCGGCCACTCACCCAAGCAG	228	340
CDHR1	GGGTGTGCCCACGAAGACAG	224	335
CDHR1	GCCATCAGAAATGCTGATGA	163	294
CDHR1	GGCCGAAAAAGTCGTGATCC	217	292
CDHR1	ATGCCAATGATGAGGCGCCC	195	255
CDHR1	CCGGACCCACTACATCACCG	260	254
CDHR1	GGATTCCTGAGAACGCCCCA	237	234
CDHR1	GCAGAGGCGCAGCAGCCCCA	193	143
CDHR1	GCCATCATCAGCATTTCTGA	156	142
CDK5	ATCTCCCGGAGGGCGGAACT	452	703
CDK5	TAGGCAGATCTCCCGGAGGG	340	586
CDK5	CGTCCGCTGTTACTCAGCTG	329	544
CDK5	ACTCCGTGGACACACTGCTG	365	542
CDK5	CAGAGCTGGCCAATGCTGGG	311	532
CDK5	CAGCGACAAGAAGCTGACTT	333	531
CDK5	CCGGGAGACTCATGAGATCG	254	488
CDK5	GGACGCCCACCGAGGAGCAG	262	462
CDK5	GAGGCTGGATGACGATGATG	408	453
CDK5	GTGTGCCGAGTTCCGCCCTC	269	436
CDK5	TCAGCTTCTTGTCGCTGTGC	317	402
CDK5	GGCCTTGAACACAGTTCCGT	304	397
CDK5	GCCCCAAAGAGGACATCCGG	227	337
CDK5	ACAGCGGACGGGAATCCCAA	263	337
CDK5	CCACGATCTCATGAGTCTCC	185	306
CDK9	ACTACCCTTGCAGCGGTTAT	358	546
CDK9	GCTCGCAGAAGTCGAACACC	256	489
CDK9	ATTGAGATTTGTCGAACCAA	301	418
CDK9	GACACTCTGGTACCGGCCCC	308	349
CDK9	GAAGCTGGCAGACTTTGGGC	121	198
CDK9	GGTATATACTACCCTTGCAG	98	144
CDK9	CGAGTCGTACTGCTTTGCCA	67	130
CDK9	GGTTGGTGTAGCGGTTGGGC	168	112
CDK9	AATGTGCTTATCACTCGTGA	118	92
CDK9	GGTGCATCATGGCAGAGATG	90	77
CDK9	CCAGAGTGTCACCACACGGT	83	71
CDK9	CAACCGCTACACCAACCGTG	87	65
CDK9	AAGCTCGCCAAGATCGGCCA	77	53
CDK9	GCACCGCAAGACCGGCCAGA	40	46
CDK9	GGTGCTGATGGAAAACGAGA	17	14
CENPI	AGATGCTTTGCAAATGGCAG	327	563
CENPI	GTTTGACTTCATTGATCGTA	261	438
CENPI	GAGATGAGCCAGTCTTGCTG	139	162
CENPI	CTTGAAAACTGTGGAAAATG	137	149
CENPI	TAGCTACTGGAATTGAGCAC	146	135
CENPI	CTATTAAATATTGCACTCAG	82	113
CENPI	AAAGAGAGTTAAGAACGTCC	56	107
CENPI	GCCGTGAAGCAAAGAAACCG	63	92
CENPI	TTCATTGCAAGATGATGCAC	42	91
CENPI	GGAACTGTGACCGACAACAA	44	89
CENPI	GCAGAATAGAAGATCCCAGG	36	83
CENPI	CAAGTGTTCTGGTAGCACCA	46	73
CENPI	ACACTTGCCAACACAAAGCC	135	72
CENPI	ACATGGACAAAACAATCCAG	70	65
CENPI	GGAGGAAACAATACCACTAA	54	19
CGB7	ATCGGGGTGTCTGAGGGCCC	310	498
CGB7	GAAGAGGAGGCCTGGAAGCG	446	497
CGB7	CTTCCAGACCCGCGTGCTGC	270	459
CGB7	CGGGATGGACTTGGAAGGCT	363	425
CGB7	AGGGGCCTTTGAGGAAGAGG	170	361
CGB7	CACCATGGTGGGGCAGTAGC	228	346
CGB7	TGAGAAGCCTTTATTGTGGG	243	338
CGB7	TGGGCGGGACATGGGCATCC	264	321
CGB7	GGGAGGATCGGGGTGTCTGA	260	301
CGB7	TGTCTGAGGGCCCCGGGAGT	298	275
CGB7	GGGCATCCAGGGAGATGCTT	198	266
CGB7	CAAGTCCATCCCGACTCCCG	258	248
CGB7	CCAGGGAGATGCTTCGGCCA	242	238
CGB7	ACCAAGGATGGAGATGTTCC	143	230
CGB7	GCTGTTGCTGCTGCTGAGCA	184	179
CHST8	GACTCACCTGGCACCTGCTG	386	815
CHST8	GCGACCTGGAACAATGCGGC	312	739
CHST8	TGCAGCTCCGAACAGCAGGA	293	562
CHST8	CCACGTGTCCCGTATCTTCG	346	475
CHST8	GGCGGTCCTCCACGAAGATA	214	436
CHST8	CCCCGGATGACCCTGCGACC	250	425
CHST8	GTTGTGCTGGATGTCGGCAG	329	385
CHST8	CTTACGTGGTGGGGCTGCCT	164	381
CHST8	AGACGGGTTCCCCTCTGCAG	281	378
CHST8	CGAGCTCCGTAGGGTCCTGC	259	359
CHST8	CAGGAATAAAGTTCAACATC	283	357
CHST8	TAAAGTTCAACATCAGGCCA	204	346
CHST8	CAGGATGGAAGAGAACATGC	153	202
CHST8	CCTCGCAGTAGAGCACGCGG	81	161
CHST8	GCAGGCTGATGAAGAGGAGG	129	134
CIB1	CATTATGCCTTCCGCATCTT	406	838
CIB1	GCTAAGGCTGTCTTTGGCTG	367	533
CIB1	GGTGAACTGCCTCACGGGAG	283	400
CIB1	GAGAACGGGAGATGACGTGC	214	364
CIB1	GATTCGCTCCTTGAAGGGGT	362	352
CIB1	AGCTGCTTCCCCAGGAGCAG	221	344
CIB1	AAGGCTGAGAATCTGCTCGA	170	259
CIB1	CTGTCATACCTGGCAAAGTC	177	241
CIB1	GGAGGAGTCTGACATTGACA	172	226
CIB1	CTTGACGTTCCTGACGAAGC	200	221
CIB1	CCAGGAAGTCCTCAAAGCTA	144	203
CIB1	GTTCTCACCAAAGATGCGGA	137	179
CIB1	GCAGCTCACAAAACCGCCTG	127	168
CIRH1A	ATGCCTTTGGAGGACCTATT	332	525
CIRH1A	CTAACAGCAGTGAGAAGCAG	179	228
CIRH1A	CTGGGATCCACAGTTGCAAC	150	224
CIRH1A	AAATCTGAAGGGCAGAGCGA	252	177
CIRH1A	GGACAGCGACTCTTTAGTGC	193	160
CIRH1A	CATCTTACCTGTTGCAACTG	103	136
CIRH1A	CGTCAGCATTAGCGATGAGA	144	117
CIRH1A	GTAGCCCGAGACTCATGACC	168	113
CIRH1A	CCAACAGCGCTGATATCTGG	51	50
CIRH1A	GCTCCAAATAGGTCCTCCAA	102	46
CIRH1A	GCCACACAGCGGATTCCTGA	24	38
CIRH1A	GCTGCAATGTGGGTACCAGA	62	15
CIRH1A	GCTCTTCACAAGCGTCCCAG	56	13
CIRH1A	GCAAGAAGACAGTTTCGTGG	33	13
CIRH1A	GGTTATTGTAAGCCACACAG	19	9
CIRH1A	GGTGTCGCCTTCTTGTCCGA	45	7
CLDND1	GGAGATCAATCCCGCTATTG	319	650
CLDND1	TGTTCCAGAGTCATTTGATG	380	597
CLDND1	AGAATGCCCGTGGCAATGGT	357	514
CLDND1	CCTCTGTCTCCGTAGCATCC	162	496
CLDND1	CAATGGTGGGATATAAGCTT	366	457
CLDND1	CAAAGTACTCACAGGTCCTA	220	365
CLDND1	GATCCCGGAAACCACAATAG	271	292
CLDND1	CTTATATCCCACCATTGCCA	117	239
CLDND1	AAAACCTACCTGCAAGGAGA	126	236
CLDND1	AAGGAGATGGAGAATGCCCG	172	233
CLDND1	CAGGGAGCTCTAGTTTCTGG	314	219
CLDND1	AGGGAGCAGAGACACAAGCC	127	158
CLDND1	CCATACCCAAAAACATGCAT	55	43
CLLU1OS	CCTTCTGAAATCTCATAGTT	391	750
CLLU1OS	ATTGGGGCACAACGAACTTA	289	602
CLLU1OS	GTACAAGTCTGGGAGATACT	406	557
CLLU1OS	CCTTCATTTCTACCAGGCAG	340	494
CLLU1OS	GGCAGTGGGGCCCCAAGTGC	243	440
CLLU1OS	GCCATAGGAAGTACAAGTCT	295	437
CLLU1OS	ACTTACCAGTGGCAGTCTTA	297	421
CLLU1OS	GAGAAGAAAGAAGACACACT	271	347
CLLU1OS	GCATATGTGAGAGCGGGCAA	257	340
CLLU1OS	TCCCAGACTTGTACTTCCTA	255	335
CLLU1OS	ACACACTTGGGCAATGATGA	262	311
CLLU1OS	GAATGCCTTAAGACTGCCAC	223	269
CLLU1OS	CGGGCAAAGGAAATGTGACA	224	239
CLLU1OS	TGATGGGAAGAAGGAAGCAC	147	191
CLLU1OS	CGCTCTCACATATGCAGAGA	89	143
CNOT6L	TTTAGGCAATCCTTTATCAC	304	510
CNOT6L	TCTCTTTCTGCCAGCATTGA	269	489
CNOT6L	AGATAACATTGGTGTCGCTG	271	439
CNOT6L	GAGAAAGCCTCTAGTAGGCC	217	434
CNOT6L	GCATGAAGTTCAGTAGCTTT	219	426
CNOT6L	AAGAGCCGACCAAGTTCATA	345	415
CNOT6L	ATTGGTGCAGAAGCATACAG	223	372
CNOT6L	TTGAAGGAGCGTGGATATGA	291	368
CNOT6L	GGAGCCTAAGTACATCACTT	218	313
CNOT6L	TGAAGCTTGGCAATATCAGG	206	287
CNOT6L	GGAATTTAACCAAGTGGCGA	180	251
CNOT6L	TCAAACCTAGAGTTTGTAGC	159	243
CNOT6L	TGGGCTTCCAGGCCTACTAG	96	155
CNOT6L	GCCACTCACTTTGAAATCAA	178	155
CNOT6L	TATCCACGCTCCTTCAATGC	159	125
CNOT6L	TTCATGCTTGACAATCTCGC	88	91
CNTNAP5	GCAGGCAGCAACTTGAATGA	248	562
CNTNAP5	TCACTGAGTGCAATAGCTTG	382	545
CNTNAP5	GAAAACTCCGGATAATGCTG	248	445
CNTNAP5	GCAGGCGGGACCTCCTGCAG	305	440
CNTNAP5	GAGGCTGCCCAGGGTGGCAG	320	412
CNTNAP5	GCGAGGTGTACAGGCACCAG	234	401
CNTNAP5	GAAAGGCACCCTTACTGGGG	326	396
CNTNAP5	GGGCAGCATGGAACAGCTGG	227	363
CNTNAP5	GATTACAGCAGTGGCCACGC	219	343
CNTNAP5	CAAGCAGGTGAACTTCACGG	208	337
CNTNAP5	AATGTGATGGGCACAATCTG	287	315
CNTNAP5	ACTCTCCAGTTGAGTTGAGC	272	305
CNTNAP5	ACAGCCCAGCTCAACTCAAC	212	232
CNTNAP5	GGGAAATGGATTCTTTACCA	155	157
CNTNAP5	GAACAGCAAAGTCAAAACGC	83	89
CNTNAP5	GGGGCACAAAGCGAACAAAT	63	67
COL16A1	AGCCTGCCAGCCAACGTGAC	347	591
COL16A1	TGGGTGCTCACCAGTCACGT	328	572
COL16A1	TGATGGCAGACGTCTTCATG	352	541
COL16A1	GCATCTTGTGTCCTCCACAG	370	501
COL16A1	GATGCATTTACCGCGTGGGC	325	485
COL16A1	GCTCCTCCAGGCAGAAGCAG	307	401
COL16A1	GAACGCCGGGCACCACAGGG	302	379
COL16A1	GGACCGGGATGTGGGTATCC	296	372
COL16A1	CTTTGGGCTACCTTCGGCCA	301	296
COL16A1	GGGGCCAGCAGGCATCAAAG	282	253
COL16A1	AACTCCTCCGGGAGACCCCG	195	251
COL16A1	GTGTTGGGCACACTTCACAG	240	225
COL16A1	GGAGGAGCCTCAAAACAGCG	123	222
COL16A1	AACACACCCACCAGAAGACG	181	194
COL16A1	GGCCAGGCAGACCAAAGCCA	113	149
COL16A1	GAAGGCAGAAAGGGGAGCAA	130	72
COPG2	TGTTCTTTAGTACCATGCAT	278	403
COPG2	GATACAGGACTCCCAATGCA	252	371
COPG2	TGCATCAAGTGATAATATTA	170	362
COPG2	TATCACTTGATGCAGCTTCT	236	322
COPG2	AGAATATGCAAACATCTTCT	186	232
COPG2	GATTCTTTACTTACTGAACC	158	156
COX14	ATGATGCTTCTCACTGTGTA	406	612
COX14	TCAGCTAGCTGCTTGCCAGT	348	612
COX14	GTTCTTCTGCGGCCTGGCGC	285	569
COX14	CCCTGCGCCACTGGAAATAG	325	507
COX14	TCTTCTGTTCTTCTGCGGCC	230	466
COX14	GTAGGGGACAAGATGCCAAC	213	428
COX14	AAGCATCATGGAGGTAGAGA	265	410
COX14	GCAGAAGAACAGAAGACCTC	196	286
COX14	GGCAAGCAGCTAGCTGACAT	225	237
COX14	ATACACAGTGAGAAGCATCA	112	230
COX14	CCAGTTCTACATGATTCCTG	220	180
COX14	GGTAGACTCGGACACTGCAG	221	178
COX14	GAGTCTACCACTATTTCCAG	106	82
COX7A1	GTTCTGAAAGCGGTTCCGGG	334	603
COX7A1	TGTCAACGATGCCGCCCTTC	418	563
COX7A1	ACAATGACGCTGTGTCTGGG	327	545
COX7A1	TGAAGGAGCGGATCAGCGCC	357	524
COX7A1	GCGTCATTGTCACTCGGTAC	269	523
COX7A1	ATCCCGTTGTACCTGAAGGG	293	485
COX7A1	GGGCGGTGGAGCTGAAGGAG	307	479
COX7A1	AAGGCAGAATGCAGGCCCTT	309	462
COX7A1	GCTTCTGTTTCTCGCGCACT	192	438
COX7A1	CGCGCACTCGGTTCTGAAAG	205	430
COX7A1	TGACATCCCGTTGTACCTGA	231	315
COX7A1	CGAGAAACAGAAGCTCTTCC	188	313
COX7A1	GTCTACAGCTTGTACTCCCT	267	310
COX7A1	GGGGAAGGAGGCCCAGCCAA	186	242
COX7A1	GAAGGAGCGGATCAGCGCCT	127	192
CRIP3	CTCTCTTCAGGGGTGAACAT	443	606
CRIP3	TGTGGCAGCGCTCACATTTC	377	597
CRIP3	GGAGTGGTGCAGCCAGGGCT	432	571
CRIP3	AGACGGGCTCCCCACAGCCA	247	527
CRIP3	CCCCAGTGAATGTCTTCATA	275	415
CRIP3	GCTGGCACCTCAGACACGGT	189	384
CRIP3	CCAAAGAGAGCCCCATAGCA	238	364
CRIP3	GTCCCCTGGCGGGCATGCAG	249	361
CRIP3	CCTGGAGCGGAGCTATGAGC	240	344
CRIP3	GTGAATGTCTTCATATGGGG	202	287
CRIP3	AGCGGTGCCAGTTCTTGCCC	218	257
CRIP3	GCTCACATTTCAGGCAGAAG	153	234
CRIP3	CAAACAGGTAGCCGTAGCAG	226	214
CRIP3	GGGGCTCTCTTTGGACCCAG	168	196
CRIP3	CCCCATATGAAGACATTCAC	111	172
CRIP3	GCTGCTGGGGCTGAGAGGAG	150	66
CRTC1	GGGTGGTCCGGCTGGTGTCC	331	508
CRTC1	CAGCAGCACCGGCAACCTCG	258	445
CRTC1	GTCCGTGTTTGTCCACTGAC	301	409
CRTC1	CCCAGCCGAGGCCAGTACTA	232	393
CRTC1	TGTCCACTGACAGGGGCCGG	280	391
CRTC1	GAAGGACCTGAGCCTGACGC	220	385
CRTC1	GCAGGGACCCGCCATAGTAC	229	371
CRTC1	TTACCCGCGCGGCCCGCGTC	247	340
CRTC1	GGGTGGTGGCTGCTGGGACG	178	337
CRTC1	GCACAATCAGAAGCAGGCGG	241	330
CRTC1	GTACTATGAGCAGCAGATGG	297	291
CRTC1	CATGTACCTCTCACCACCCG	207	291
CRTC1	GGAGCTGCTCAGTGCAGGGA	249	290
CRTC1	GGGTGACAGCGGGGACAGGG	276	221
CRTC1	TGGCGACTTCGAACAATCCG	183	213
CRTC1	TGGGACGCGGGTGGAGGAGG	124	62
CS	TTACCATGTCCACAGTGATT	459	905
CS	CGCCCGGCTCTTGGGAACCA	284	566
CS	CTCAAGGGCATCCGTTTCCG	227	537
CS	GTATCAGCCGAACCAAGTAC	324	462
CS	TGCAAAGGACAGGTAAGGGT	318	453
CS	AACTGGACATATCCCAACAG	208	407
CS	GGCACTGCCCACCAAATGGC	163	350
CS	TAGATGTATGGTGGCATGAG	351	290
CS	ATTCAGGGATACTAAAGCCT	145	277
CS	GCATGCCAGTGCTTCCTCCA	112	263
CS	AATCTCTACAGAGAAGGCAG	177	237
CS	GCAGCAACATGGCAAGACGG	211	225
CS	CCTTACCGTGGAGGAAGCAC	166	222
CS	CCCCACAGTGACCATGAGGG	175	175
CS	TCACCTTGGTTCCCAAGAGC	92	166
CS	TGACCTGATACCTAAGGAGC	172	149
CXCL14	GGCGCTGTACACCGCGCGTG	530	666
CXCL14	CTGTACACCGCGCGTGTGGA	412	656
CXCL14	AAGAGCGTGTCCAGGTACCG	337	513
CXCL14	GCACCAAGCGCTTCATCAAG	282	419
CXCL14	GCGGCGTGGGAGCAGGGACA	221	375
CXCL14	CCCCAGGGTCTACGAAGAAT	158	338
CXCL14	GCACTCACCGTCCACACGCG	322	324
CXCL14	GCCAAAGTACCCGCACTGCG	196	301
CXCL14	GCTTCTTCACGTCGCTGTAG	213	292
CXCL14	ACGCCTGGAACGAGAAGCGC	201	262
CXCL14	GGTCAGCATGAGGCTCCTGG	272	231
CXCL14	CAAATGCAAGTGCTCCCGGA	236	228
CXCL14	CAGCAGCAGCAGGAGCAGCG	114	154
CXCR4	ATGCTGATCCCAATGTAGTA	328	726
CXCR4	TGTTGGCTGCCTTACTACAT	405	597
CXCR4	GTACAGGCTGCACCTGTCAG	304	518
CXCR4	CAACCATGATGTGCTGAAAC	249	486
CXCR4	GGAATAGTCAGCAGGAGGGC	259	432
CXCR4	GCACTCACCTCTGTGAGCAG	201	399
CXCR4	GCTGGACCCTCTGCTCACAG	238	341
CXCR4	CAAGTGGATTTCCATCACCG	203	325
CXCR4	ACTTACACTGATCCCCTCCA	281	323
CXCR4	GAAGCGTGATGACAAAGAGG	192	313
CXCR4	GGATGGGGTTCAGACAACAG	269	312
CXCR4	GAAGCTGTTGGCTGAAAAGG	246	290
CXCR4	GAAGATGATGGAGTAGATGG	183	232
CXCR4	GGGCAATGGATTGGTCATCC	214	191
CXCR4	CACTTCAGATAACTACACCG	81	36
CXXC1	CCATCCGGGAGTGGTACTGT	335	592
CXXC1	GTTGGGTGGGCAGTGGCCGG	314	557
CXXC1	ACGCCGATTCCATGAGCTTG	266	454
CXXC1	GGTGTCCTGCAGGAGGGAGA	229	340
CXXC1	ACTCCCGACAGTACCACTCC	381	340
CXXC1	GAGCCCCGGGATGAGGGTGG	222	329
CXXC1	CCCAGAGCCTCCAGATGCCG	214	328
CXXC1	GGTGTGGCTGTAGCCTCAGG	229	326
CXXC1	GGGCTGGACTCACCGAGGAA	219	317
CXXC1	CTACTGCATCTGCCGCAAAC	199	313
CXXC1	GCTATCGGCACAAGAAGTCA	206	274
CXXC1	GAGGACAGCAAGTCCGAGAA	172	260
CXXC1	GGTGTGGCCACCAAGGGCTG	249	250
CXXC1	AAGAAGTCACGGGAGCGGGA	180	180
CXXC1	ATCGGCGTTCCATTTCCTGA	181	169
CXXC1	GGTGTGACAACTGCAATGAG	198	113
CYB5RL	CCTGAGTGTACCGTAGGATG	339	439
CYB5RL	TGTCCCGGTATGTTGAGTCC	304	415
CYB5RL	GCCGCAGCACTGGGAAGGCA	220	399
CYB5RL	TGACCTCTATCACCGAGATC	274	391
CYB5RL	GGAAGAGGACGACGACACTG	312	371
CYB5RL	GGAGGCAGCCCAAGCCAGCA	207	344
CYB5RL	AATGATGCAGAAGGCCACGA	209	343
CYB5RL	CTAAGGACACCTACCGTGTC	201	340
CYB5RL	GGAACAGCCAGCTTGGCCTG	280	329
CYB5RL	TTATAGAAGAAATCTCCGAA	195	325
CYB5RL	TCGGAGAAAGCCATTCGCAC	248	319
CYB5RL	GCTGAACCCAGAGACCTTCG	326	294
CYB5RL	GATGATGGCTGAGAGGGAAG	170	288
CYB5RL	GCTCTGCAGGATAGGCACCA	292	262
CYB5RL	GGCTGAGTACAAAGAAGGTA	181	261
CYB5RL	GAAAACCTTCCTCCAAGAGC	102	118
CYP21A2	CCCTTACAGGTAAGTGGCTC	231	538
CYP21A2	CCCTCCACTGGCCTGCCACG	359	535
CYP21A2	CCCTCTGCAGGAGAGCCTCG	339	474
CYP21A2	CTTGTGGGCTTTCCAGAGCA	310	452
CYP21A2	GAACTACCCGGACCTGTCCT	379	419
CYP21A2	GATTCAGCAGCGACTGCAGG	345	393
CYP21A2	GAGGTAACAGATGATGCTGC	208	391
CYP21A2	AAGAAGCCCGGGGCAAGAGG	254	390
CYP21A2	AGAGAAGAGGGATCACATCG	210	386
CYP21A2	TGGTGGTGCTGAACTCCAAG	294	363
CYP21A2	CAGGTCCTCACCCTGAGAAA	248	361
CYP21A2	GGGAGTAGTCTCCCAAGGAC	177	310
CYP21A2	ACATCGTGGAGATGCAGCTG	260	290
CYP21A2	CTAAGGGCACAACGGGCCGC	208	271
CYP21A2	ATCATCTGTTACCTCACCTT	224	198
CYP21A2	TGCCTATTACAAATGTATCC	54	48
CYSTM1	TAAGGTGGGTATGGGGCCGT	505	829
CYSTM1	ACTGTGGGTATCCTTGGTAG	395	715
CYSTM1	GTCCTAGCTCATCTCTTCTT	389	583
CYSTM1	GATATGGTGGAGGGTTCTCT	341	517
CYSTM1	CCTGGACCCATTGGTTGTGG	346	468
CYSTM1	CCACCCTGCCAGCCGTACTG	280	458
CYSTM1	GGACCCTACCCACCTCCTCA	275	433
CYSTM1	GGTGGGTAGGGTCCCCCCAT	324	425
CYSTM1	TAGGGGTACCCTTGAGGAGG	285	409
CYSTM1	GCAACAGAGAGCCGTCCAGC	241	403
CYSTM1	CCAGGGCCTGGATATGGTGG	277	402
CYSTM1	GGTATGGGGCCGTTGGACCA	238	383
CYSTM1	CAGGAGCCTCCTAAAACCAC	208	313
CYSTM1	ACCTTATCCACCACAACCAA	111	162
DCN	CTAGGGAGGGCTCGAAGTCG	372	711
DCN	CTGTTGAAACGGTCCAGCCC	327	559
DCN	CATCAAGATGTAATTCCGTA	314	475
DCN	AAGCAGAAGGAGGATGATAG	315	462
DCN	AGTCGTTCCAACTTCACCAA	278	443
DCN	ACCAATCCGCTGAAGAGCTC	169	431
DCN	TCTATCACCTTGAGGAATGC	252	412
DCN	TTCTTACGTGAAGGTTCTTC	232	393
DCN	GAAGATGAGGCTTCTGGGAT	234	381
DCN	AAACTTGTGCAAGCAGAAGG	211	380
DCN	CACGTAGACACATCTGAAGG	196	351
DCN	AACACTGGACCACTCGAAGA	252	309
DCN	GGGCACACTGGGCCTAGGGA	318	257
DCN	ACTCACCCAAATCAGAACAC	97	246
DCN	GATGGCATTGACAGCGGAAG	225	220
DCN	CTGTACCTATGACAATCATC	170	186
DCT	ACGATCCGACTCTGATTAGT	386	641
DCT	GCCGACTCTGCACCCAGGCG	372	538
DCT	CAGGACCAGGACGCCCCTAC	243	484
DCT	CGGTGCCAGGTAACAAATGC	305	463
DCT	AAGGAGTGCTGCCCACGCCT	291	441
DCT	GTGTGGTGATCACGTAGTCG	323	435
DCT	GAGCACCCACCTGAAACTGA	278	431
DCT	ATGTTCTGCCGAATCACTGG	212	429
DCT	GTAGAGTTCTGGAAGAAGGG	320	417
DCT	AGGATGTAGGGACCACTCCA	281	394
DCT	TCTCTTCTTCGCGAGATCTA	256	379
DCT	GAGTTCCGACTAATCAGAGT	224	353
DCT	TGTGGCTCTCAGCAAGGCCG	215	335
DCT	GAAGGGTTTGATAAAGCAGA	155	231
DCT	GGACCGGTCCCAACTGCGAG	294	217
DDX28	CTCCATCGAGCGCGCGCAAC	295	522
DDX28	AACAGCGGCAGAGCAGGCGG	320	378
DDX28	GTCGTTTGCGCCGCAGAAAC	202	374
DDX28	GGTGCGAAAGCTCTCGTCTA	332	252
DDX28	GAACACCAGAACAGTTCCTG	250	199
DDX28	GGGATGCGCACCACCGGCAG	205	167
DDX28	GGGCAAAGGCTCTTTCACCG	148	162
DDX28	GGAAGAGTCGACGCGCGCGT	160	136
DDX28	GACGAGAGCTTTCGCACCGC	277	126
DDX28	GCACCAGCAGGCCCAAGGAG	203	116
DDX28	GTGGAGCTTGGAGCTGGTGA	296	81
DDX28	GAGAATTGGCCCAACAGGTG	247	69
DDX28	GCCTGATCCTACGCATGCCG	185	55
DDX28	GGTGGTGACAGCATCTGGGC	152	41
DDX28	TGTGCTGCACGCACTACAGG	206	12
DEFB107A	GAAAATATTTGTCTTTATTT	257	459
DEFB107A	TGCTCTATGAATTGCTGTCC	228	448
DEFB107A	AGCACTAATTAGTAAGAGAA	131	311
DEFB107A	GCCCCCAATCTTTACTTCAA	136	188
DEFB107A	CTTACCTTTGAAGTAAAGAT	85	165
DEFB135	TTTCTCTTGGCAGGTAGAAG	418	618
DEFB135	GCTTCATGTTGGCGACTGCA	273	536
DEFB135	GGCCACAAGGAGCGTCCTCT	451	511
DEFB135	TAAGGACCACGAGGGCCAAG	408	471
DEFB135	TGCTGATTGGTATGGCCACA	275	450
DEFB135	GAACATAGAAGAGTAAGTTA	254	448
DEFB135	GGCCAAGAGGACGCTCCTTG	212	294
DEFB135	AACTATTTCCCAGTCAGTAT	176	252
DEFB135	GGCGACTGCAAGGTACTTGC	143	237
DEFB135	GAGTAAGTTAAGGACCACGA	154	224
DEFB135	TTACTCTTCTATGTTCCACC	82	135
DEFB135	AAATATTTACCTATACTGAC	81	133
DEPDC5	GACTTGACCTGCAAAAGCAG	334	996
DEPDC5	GCTTGGTCAGGATCATGAGT	333	697
DEPDC5	TGTTAATGTCGTAGACCCTA	274	693
DEPDC5	GAGCACAGGCTGGTGAACTG	204	637
DEPDC5	AGCACAAGGAAACTACCTGG	244	595
DEPDC5	GGAACACTTGAGTCACAGTC	195	560
DEPDC5	GCTACATCAGTGAAGATACC	225	504
DEPDC5	AGTGGTGATCACGCCCGGGG	238	490
DEPDC5	AAGGATCAGTATATTGGCCG	292	486
DEPDC5	ACTGTGGGTTAAGAATGAGA	166	476
DEPDC5	GTGAGGCACTGGGCCCGGGA	300	447
DEPDC5	TCTGGCAGAAAACCTGCAGG	252	402
DEPDC5	TCTTAAGGAAGATTTACAGA	164	383
DEPDC5	GTGCAAGATGAGAACAACAA	119	353
DEPDC5	TATTCTTTCAGAGCACAGGC	122	253
DEXI	CCCGCTGCATGCTCGGCGCC	281	635
DEXI	CGACGTCTTTGATGCGTACT	419	565
DEXI	CTTTGATGCGTACTTGGAGT	344	490
DEXI	GAGCGCCTGGTCCATGTCCT	421	396
DEXI	GGGCCTCGTCTTCCTGCCCG	298	365
DEXI	GCTCCGAGTCAGCATCGTAA	185	353
DEXI	CCTGGTCCATGTCCTCGGGC	192	266
DEXI	ATAGAGGGCAGCAGCGGCGG	207	231
DEXI	GGCGGCACGTAGGGGACCAG	212	214
DEXI	GACCAGGCGCTCGTGGACCT	232	208
DEXI	CGCGGCCCACCTGGACGCAC	158	208
DEXI	GTAAAGGCCCGAGCCGGGGT	153	129
DEXI	GGGGCCCAGTGCGTCCAGGT	160	125
DEXI	GGAGTACATCGTCCTCAACG	123	93
DIAPH3	AACTTGGGGCGCTTCTCCCC	379	438
DIAPH3	AAGAGAATAGCACTGAGCCG	259	427
DIAPH3	GCAGCCGCGGAGAGAGGCTG	301	334
DIAPH3	AAGCCGACAGATCTCACCTC	275	316
DIAPH3	GGGAAAGCAAGATGCCGCGC	214	258
DIAPH3	GTCATGCAAGTCCTCAGGAG	234	219
DIAPH3	CCAGCGGCTGAGCCTTGGGC	153	200
DIAPH3	GGAAGGGTAGGGAGTCCCAG	277	194
DIAPH3	AAGACACTCGGAGAGACTCC	165	181
DIAPH3	GCAGCTTCAACAGCTTGAGA	171	145
DIAPH3	AGAGCTAAGGTTAAATCCGA	149	118
DIAPH3	GAATTTAAATGAAGATAAAA	44	110
DIAPH3	TATGCAGCTCATCAATGCCC	108	93
DIAPH3	GAAGGCAGTGGAGGCGGAGG	216	86
DIAPH3	CTTCAGTATCAAAAAAGAAA	44	77
DMRTA2	CGATCTCATGCGTGACCGCT	383	583
DMRTA2	GACGCCACCGACGCCACAGG	321	440
DMRTA2	GTCTGCGCCGTCGGGTGATA	354	439
DMRTA2	TAGCGATGCAGCGGCCGCCG	277	439
DMRTA2	GCTGCTCTACGGCACTGCCG	407	432
DMRTA2	GCTGCCCGCAGCAACAGTGG	307	427
DMRTA2	GGAGCGCCAGCGTGTCATGG	288	391
DMRTA2	GGGGATGATGCCGTTGGCGG	251	384
DMRTA2	GAGGCGGAGCAGCTGGCGCA	153	335
DMRTA2	CGCCAAGTGCACGCTCATCG	291	320
DMRTA2	GCGCTGTCGCAACCATGGCG	279	305
DMRTA2	TCAGTGTGCGCCGCCGACGG	243	284
DMRTA2	CGTTGACCATAGGCCCGTAC	241	273
DMRTA2	GGGCAGCCGAGAAGTACCCG	247	217
DMRTA2	GCAGGCGCAGGAGGAGAACG	164	177
DMRTA2	ACGCGTGTCAAGATATCCAG	123	131
DNAJB8	TCGTCCACCGAGATGATCAA	427	634
DNAJB8	AGAATTTCCGGCCTTCATGG	315	486
DNAJB8	AGCCCATTCAATAGTGACCG	291	486
DNAJB8	CCACCACGGTCACTATTGAA	263	423
DNAJB8	TCTTGTCGGGGTGCCAACGA	336	421
DNAJB8	CCATTCAATAGTGACCGTGG	203	382
DNAJB8	GTGCTGGCTGTGACAGCTGG	357	380
DNAJB8	GAACGGGCAGGAGCGCGTGG	209	317
DNAJB8	GATGTCCTCAGGGTTACGGA	182	307
DNAJB8	GTCGGTGACTGTGAACGGCA	182	282
DNAJB8	GATGTCCTCCGGGGAAGCGC	207	243
DNAJB8	CACTTCGTAGTAGTTAGCCA	185	215
DNAJB8	GAACCCTGACAATAAGGAGG	199	172
DNAJB8	GGCGGAGAAGAAGTTCAAGC	133	159
DNAJB8	GGCTAACTACTACGAAGTGC	67	143
DPRX	ATTTGCAGGGACCTTGAGGT	388	609
DPRX	GCCATTTCTTTCTGAAGGCT	331	597
DPRX	GCCGATCGGGTGAGCAGCGT	327	554
DPRX	CCGATCGGGTGAGCAGCGTT	369	552
DPRX	CCCAACGCTGCTCACCCGAT	444	546
DPRX	CAACCGCCAATACCAGAGGG	248	397
DPRX	GTACAGGATGAGCTGGAATG	212	392
DPRX	GGGATTCCAAAATGGGGTAG	280	375
DPRX	TTACGAAGATCCTCTGAGCC	238	345
DPRX	GAAGCTTGGAGCGCAAACTT	252	343
DPRX	GGTGGGGTCTCCACCAGTGT	175	248
DPRX	TTAGAAGATGCCAGGCTCAG	212	223
DPRX	GGCTCAGAGGATCTTCGTAA	178	210
DPRX	CATACACCCAACAGTACTGC	112	169
DPRX	CATGTTCACTAAGAAGCAAC	69	57
dummyguide	TGGATCGGCAGTGGTACTGG	610	1256
dummyguide	CGTCGCCATATGCCGGTGGC	362	1064
dummyguide	TGACACATTGGCTGGGTGTT	454	1040
dummyguide	TGAGTCTTACTAGGTCCTGT	524	981
dummyguide	AGGGTCAGTCTGTCCTTTTT	608	961
dummyguide	TGACGCTCCACGTCCGGACC	536	927
dummyguide	GGGAGGTGGCTTTAGGTTTT	517	923
dummyguide	TGTCCCTTGCAACCTCCGTT	591	909
dummyguide	TAACCGATACTCCCCACATT	413	908
dummyguide	GTCGTCCGGGATTACAAAAT	556	904
dummyguide	TGAACGGTGAAGAGATAGGG	385	899
dummyguide	AAACGGTACGACAGCGTGTG	415	887
dummyguide	GACGCCCTAATGCCCATCGT	413	882
dummyguide	AGAACCCAGACGCCAGCGGT	414	878
dummyguide	CGGAGCTTAGCGTGGGGGCG	442	877
dummyguide	CTGTGTTGCTCCCCTCCCCT	468	875
dummyguide	ACGATCGGTAATGGTCTGTT	500	870
dummyguide	TTGTACGGTACTGGCTTTGT	485	861
dummyguide	CCTACGCGGTAGGGAACTTT	480	856
dummyguide	AAAGCGACGTAGGCATACTT	420	850
dummyguide	CATTGTTGAGCGGGCGCGCT	384	847
dummyguide	TAGATCGAGTTTATTTTCCT	442	838
dummyguide	CTTGTTGCGTATACGAGACT	317	831
dummyguide	GTACGGGGCGATCATCCACA	347	830
dummyguide	CTCATGAGTCGTTTCTTTCA	417	830
dummyguide	CCGGCAAGAAACTATACTTG	302	829
dummyguide	ATTAGCACGGCGACCTTCTA	350	825
dummyguide	AGAATGCCATCTAGTTAGTA	407	822
dummyguide	AACTAGAATAGGCGGGCTTG	438	820
dummyguide	CGTGCCTTTACATTCACTTT	462	813
dummyguide	AGAGGGATTGGGAGCTTGAC	389	811
dummyguide	ACTGCTGCTGACATCTCTTA	338	808
dummyguide	TGAAGTGGGGCGTCGGACAC	493	807
dummyguide	TAGTCCTTAGGGTGGGCTGA	406	807
dummyguide	GCGATCGGAGTGCCACGATA	483	805
dummyguide	CTCTCTCCTACCTGTCCACC	402	801
dummyguide	ACTGAGTGGGTAACACGCAT	342	799
dummyguide	ACTGCGGAGCGCCCAATATC	438	794
dummyguide	GCCCCGCCGCCCTCCCCTCC	357	794
dummyguide	AAGTGTGTGCATAGCAGGGT	439	792
dummyguide	CAATGGCGTGGACATTTGAT	319	786
dummyguide	ACTATCATGGCACCCAATTG	395	785
dummyguide	AAGAATTAGGCACGGTTACT	494	784
dummyguide	AAACTGTAGTGCAGGGTCAG	408	784
dummyguide	TCCCAAGGGTTTAAGTCGGG	472	783
dummyguide	TCCCCGAGACCATCTTAGGG	424	782
dummyguide	TTTGGTCAACGCATAGCTTG	423	781
dummyguide	AGTCTTGGCCAATGTCACGG	373	780
dummyguide	AGGATCGTGTACCGGGGACG	406	779
dummyguide	TCGAGATGCGCAGCAGATGA	353	775
dummyguide	GACGCCTTGCCCGGCTCACA	421	775
dummyguide	CAGACGGTTGGTAAGGACGC	437	774
dummyguide	CCTCTCACCGACTCTGTGTC	399	772
dummyguide	TCACTTGTCTATACGGGGTA	401	769
dummyguide	TCACTTTACACTTGTAGTGT	331	769
dummyguide	AACGCGAGTCCGGTGGCTAG	376	763
dummyguide	GAGTGATGCTTAGACTCCGT	374	757
dummyguide	TTCGGAACTTACTCAGGGTA	374	757
dummyguide	TCTGGCTTGACACGACCGTT	491	755
dummyguide	GTAGGGTACAGCGTCAGCTT	376	754
dummyguide	AAGGCGCGCGAATGTGGCAG	398	753
dummyguide	GTAAGGCCCGCGTACGAGCT	398	753
dummyguide	TCTACCTATTGTGGAATTTG	380	753
dummyguide	TTCGTGGTAGGTATAACTAT	359	752
dummyguide	AATCGACTCGAACTTCGTGT	318	748
dummyguide	TCCGTCTGCTTCATGAGCGG	521	747
dummyguide	TTGTCCGTGACCCTGATTAA	455	747
dummyguide	ATACAATACTTTGGCGCATA	296	744
dummyguide	ATCAAGTCAGGTTATGCGGG	376	743
dummyguide	ATACGCATGATTGCAAGAGG	272	742
dummyguide	GTCTTCACAGGGTGCAACGA	396	738
dummyguide	TAGAGATATCCGATCGTGGT	321	732
dummyguide	TTCTTAGAAGTTGCTCCACG	947	732
dummyguide	ACGTTCGAGTACGACCAGCT	254	731
dummyguide	CATGGCCTACGGTGTCTTTG	470	731
dummyguide	AGTGTATCTTCCACCTGTCT	401	730
dummyguide	AGGGCGAGCAGCAGAGTACG	367	728
dummyguide	CTCGGCCCACTTGCGTTATA	449	727
dummyguide	TCTACGTGTAGTTGTACATA	306	727
dummyguide	CGACTAACCGGAAACTTTTT	387	726
dummyguide	CCCGCCGAAGACCCTGCTTG	442	726
dummyguide	GATGGCGCGCAGTTGAGTCA	327	725
dummyguide	TGCCCACTTAGCAACACTCT	381	725
dummyguide	CGCTAGGTCCGGTAAGTGCG	452	723
dummyguide	CGACCCATGGATGTGAACCC	328	723
dummyguide	AGGATGGATTGAGCAGCGGT	403	723
dummyguide	ACATAGTCGACGGCTCGATT	276	721
dummyguide	ATGCGCAGCTCCAGAATTTT	429	721
dummyguide	ACTTCAGTTCGGCGTAGTCA	385	719
dummyguide	CCCTCAGGAGCTACTAAGGT	396	718
dummyguide	GCACGAGGTGAACAGCCGCT	401	718
dummyguide	CAGTGTCCGAGCGATATTTT	487	717
dummyguide	CAAGTGAGCATAAGCGATGT	321	717
dummyguide	CCTAGAGGTCCCAAGGCGTG	352	717
dummyguide	TTGGCCTGGAATTTAGGATC	436	717
dummyguide	ACGGGCGGCTATCGCTGACT	481	716
dummyguide	AGGCGCCAACATTGACCGTA	318	713
dummyguide	GCTTAACCTATCCGCCAGTA	353	710
dummyguide	CCAGGCTGAAGTTCGTACCT	473	710
dummyguide	CGACAACGTGCAGGTGTATC	395	709
dummyguide	TCGGCTACAATCTTTGGCAT	375	704
dummyguide	TGTCAGTAGTCAGGACCCCG	443	703
dummyguide	AAAAAGCTTCCGCCTGATGG	349	702
dummyguide	AATCTTACTCGTCCTCCTTG	378	702
dummyguide	TAGATTGGCCCCACAAAGCG	362	701
dummyguide	CAGGCTGCGCTTCGCAAGCT	379	700
dummyguide	TGGTTCCGTAGGTCGGTATA	439	697
dummyguide	GAGGTATGTCATCGCCATGA	321	696
dummyguide	ACTAGCCTGTTCGCGAGTAG	457	695
dummyguide	ATCAGGCCTTGTCCGTGATT	463	695
dummyguide	GAGCTTAGCAAAGGGTTGGG	430	695
dummyguide	AAGGACTGGAATATGGAGAG	308	694
dummyguide	CAATCGGCGACGTTTTAAAT	366	693
dummyguide	GAAGCGATCCGAGAGTGTAT	362	692
dummyguide	GGTCGCCTGTGCGACATGCT	383	687
dummyguide	CGCTTCCGCGGCCCGTTCAA	403	686
dummyguide	TGGGAATTCCTCGGCCGATT	392	686
dummyguide	TCTAAAGCCGTCCTGATGTT	453	685
dummyguide	ATCGTTTCCGCTTAACGGCG	385	684
dummyguide	TCGCGCTTGGGTTATACGCT	311	684
dummyguide	TCTGGCTTGCACCGTGTCAT	423	683
dummyguide	CTTTATCTGGCGTGGGGTAT	332	682
dummyguide	ATTCCTTCGGCGCTCTGCGT	443	680
dummyguide	ACGTCCATACTGTCGGCTAC	364	679
dummyguide	CCAGTTATAATTAGGGGTTT	350	679
dummyguide	ACTACTGGCTATCCGCGCCA	316	676
dummyguide	CCTACTCCCGTGTGTTATCC	358	674
dummyguide	CTTAGGATTCCGAGGTATCT	396	673
dummyguide	GCTGTTCCGAAGTTGAGAAT	359	673
dummyguide	GAGTTATTTATTCTCTCGAG	297	673
dummyguide	GAACGTAGAAATTCCCATTT	436	672
dummyguide	TAGGGGATTAGCTGACAGTC	443	672
dummyguide	GCGGTTCCGGGAGCACATTT	430	669
dummyguide	TCGATGTAGCCCCGCCCAAG	394	669
dummyguide	GACGAGGGCGGCAGAGCAGT	375	669
dummyguide	GTAGACGTCGTGAGCTTCAC	374	666
dummyguide	TGCCTATGACCTAGGTACCA	371	666
dummyguide	TGCAGGTCTAGGTCCCAAAG	310	666
dummyguide	AAGCGGGCACACATGACAAG	320	664
dummyguide	GGTTCGAGACCTACTTAAGT	356	659
dummyguide	AGCCGGCTTGTGACAGTGAA	271	658
dummyguide	GAACCGACTTGAAGGGGGCT	417	657
dummyguide	TGTTTTGCATGTTGCATAGG	409	655
dummyguide	GTTCATTTCCAAGTCCGCTG	242	654
dummyguide	ATTAGGCCTTTTTCTTAACT	475	654
dummyguide	ACAAAATGCCGTGCGTCAAT	355	653
dummyguide	TCAGATTCCGCAAGGGTCCA	503	653
dummyguide	TCCCTGCATTCATGGTTTTA	515	652
dummyguide	CGTCAAGTATTAAGCTGCTT	295	650
dummyguide	TCCTGCCAAGAAACACCCTT	428	650
dummyguide	ACTCAGCCATTTTATTAGAA	349	650
dummyguide	GCCCAGACGCCCTAGAATAG	356	646
dummyguide	CCTCCGTGCTAACGCGGACG	355	645
dummyguide	TCCTCGATAGCTGGAATCCA	340	643
dummyguide	CTGTCCACCTACAGCGATGT	369	643
dummyguide	AAGCACTAGTCCGTATGATG	336	640
dummyguide	ACGGGGTGAAACCATGTCGT	369	640
dummyguide	AGTACCCCTAGGTATGGGGA	343	640
dummyguide	AACTAGCCCGAGCAGCTTCG	297	637
dummyguide	AATGCGAGTGTATCCGCAGT	237	637
dummyguide	GGTCCCTCAGGGTGCAACTT	381	636
dummyguide	CTATCTCGAGTGGTAATGCG	349	635
dummyguide	GGATGTTTCTGTGCGCACAT	373	635
dummyguide	GGTCTCACCTGCACCCCGAA	405	633
dummyguide	GTGCGCATGGGCTGATGTTA	398	633
dummyguide	CTAACGGACTGCAGAACGGA	309	632
dummyguide	CGTCCCTTCGTCTCTGCTTA	355	631
dummyguide	GTACCCCTATGGCCGTTCTA	415	630
dummyguide	CCGTGTTCCACAACTACCCT	371	630
dummyguide	TCAGTATCGGCTGCTGGTAA	428	630
dummyguide	AGCTCCATCGCCGCGATAAT	366	627
dummyguide	GTGTCGGATTCCGCCGCTTA	403	626
dummyguide	ACGGTGGGGATGGACCTACT	276	626
dummyguide	CAGGAGTCGCCGATACGCGT	301	625
dummyguide	ACTTCCCACTTCTTAGGTTG	427	625
dummyguide	AGGTAAGCCCCTTAGAACTG	381	623
dummyguide	GTTACGTACCCTCCAACTTC	317	622
dummyguide	GCCTAGTCTCGGTAAGAGTG	381	621
dummyguide	GACGTAGCCTTCCGAAATAT	345	620
dummyguide	GCCCTTCAATGCGTTCCGTA	299	620
dummyguide	TTAACGCCTTATTTTTATGT	358	620
dummyguide	GACCTATGCCAGAAAGTTCG	344	619
dummyguide	TAACCCAGAAGCCCATTCAG	287	619
dummyguide	ATCGTTGCTGACAGGATCTA	379	617
dummyguide	GGTTGCTGTGACGAACGGGG	305	617
dummyguide	ACCCATGAGTTAAGTTTTCT	445	617
dummyguide	CGTGGCCGGAACCGTCATAG	296	616
dummyguide	TAAGGCGACCTGCGCTTGTG	301	616
dummyguide	ATCGGTACCTCTTCACATAT	312	616
dummyguide	CAGAGCCTTGCGCAATTTTG	451	616
dummyguide	GGAGAGGGCCCGCGAACTCA	363	615
dummyguide	CAGTCGTTTCTATGGGATCT	320	615
dummyguide	TGTCATGCGTCACTTAGTGC	344	615
dummyguide	CTGTATTAACGAACCTTGTG	280	614
dummyguide	CCCTACCTATCCGGTGCTTT	368	613
dummyguide	TAAGATCCGCGGGTGGCAAC	327	611
dummyguide	CGCAGGCTAGATGACACCAG	350	611
dummyguide	TTTAACTGTCCCGGTGTGCA	509	610
dummyguide	AAGAGTAGTAGACGCCCGGG	321	609
dummyguide	TAAGCCTCATGAAGGAGGGG	360	609
dummyguide	CCACACCTGTCTAGCATGAC	310	608
dummyguide	TTCTTCGGCCTACACCCGGT	473	607
dummyguide	ATACCAGATGCGTCCGCTTG	459	607
dummyguide	GAGAGTGCGCCTTGATAGTA	377	606
dummyguide	ATCCTAGGTACAAAAGGACG	330	606
dummyguide	CGGGATGCAGCTGGAGAGGA	327	605
dummyguide	TATCAATCGTCCGGGTCACT	385	604
[truncated: 5,929 more rows]
