# Supplementary material for: Negative regulation of autophagy by UBA6-BIRC6–mediated ubiquitination of LC3
Source: eLife. 2019 Nov 6;8:e50034. doi: 10.7554/eLife.50034 (PMC6863627; doi:10.7554/eLife.50034)
Supplement: Supplementary file 6. [file elife-50034-supp6.xlsx]

## Sheet: summary
Supplementary file 6. List of sgRNAs used in the ubiquitination CRISPR library
gene_id	sgRNA sequence
AKTIP	CTTACTGGACAGTCACCATC
AKTIP	CACCACTTACCTAATTGCAT
AKTIP	TAGAAGACCCCTATGCAATT
AKTIP	CTTAATGCAGAGCGATAAGA
AKTIP	GGTGAAGAGAAGACATTAAC
AKTIP	CTGCAAGAAGAGAGTATTCC
AKTIP	GGAGTAATATTCATACGGCA
AKTIP	CCACTTACCTAATTGCATAG
AKTIP	ACATCCAGCTCACCTGAGGT
AKTIP	GGCAGGTATTAATGTATGCA
AKTIP	ACATACAGTACTGCAGCCTC
AKTIP	AGGGGTCTTCTATTTTAGGT
AKTIP	CGGCATGGACTTTACCAAGA
AKTIP	GGCCTGTCATGGGTAAAGCC
AKTIP	CCTGAGGTGGGATCAACTAG
ALG13	CAGTACTGAGTCGTTTACTC
ALG13	GATCTTGTTATTAGTCACGC
ALG13	GAAGAATATCTTTATCGTGC
ALG13	CTTCTGGGGGTAGTTGTATG
ALG13	CTCATACAACTACCCCCAGA
ALG13	ACACCTGAAGTTTCATAGTC
ALG13	GCAAAGCAGCTACACAAAGA
ALG13	GAACAATCATCAGCTGGAAC
ALG13	AATGAGGTCGTCAAAGCTGG
ALG13	GCAAATTGGTAGAGGAACGG
ALG13	AGGATGGGTAGCAGTAACAA
ALG13	GGAACGGTTGGGAGATCCCA
ALG13	GAGGTTACCAGAAAATGCCT
ALG13	GGAACGGTTTGATCTACCAG
ALG13	GCAATGGACTTGGCTTGCCC
ALG13	GTCGGGGATATGGGATGCCC
AMFR	CGGCGAGCCGGACCAGCTAA
AMFR	CGCGCGGTAGGCGCTGATGA
AMFR	TGTCTCTCACTCACTCGAAG
AMFR	TCTTCGAGTGAGTGAGAGAC
AMFR	AGTCTCTTCTTGTGACAGTG
AMFR	AGCGAGGCCGTTAGCTGGTC
AMFR	GCTGCGCGGAAACTGCCCTG
AMFR	GGAGGTCCTGCAGTACCAGA
AMFR	GGAGACGCTGGACTTCGGCG
AMFR	AAGCGCTCGAGGAAGAGCAG
AMFR	TTAGCTGGTCCGGCTCGCCG
AMFR	AGACAAGTCCGGCAAACCAG
AMFR	ACCGTGGCTGCTCATCGGCG
AMFR	ACAGGGACAGGACTCGACCG
AMFR	GTAGCCGGTGATGGAGCAGA
AMFR	AAAGATGACCAGGCTGGCCA
ANAPC1	AAACAGCAATCCATATTTAG
ANAPC1	GTGTGACTTCATTATATCAC
ANAPC1	CCTGAAAGGTTGCAAATGTT
ANAPC1	TTACCTCTGATTTGACTCTC
ANAPC1	TTCAAAATGTGCATTCTGTG
ANAPC1	AATGAATACCTGGGTGAACC
ANAPC1	GATGAGACTCAACATTCTGG
ANAPC1	GTTGCCTGCATACATCGCAA
ANAPC1	GACTTGTCTCATGAACATGA
ANAPC1	CTGGAAAGGTGAAGTCACAG
ANAPC1	TGTCCATAACAGAGTCACCC
ANAPC1	TACAACAGAAGCATTAGGTG
ANAPC1	GGACAACGATGATTGCAGCA
ANAPC1	AGTTCTTGTCTGAAGGGTGA
ANAPC1	ATGGAGGAGTAATTCTGGAA
ANAPC1	ACAGGAACTTTTGCCCACAT
ANAPC10	TGTATCATGAATGTACGAGT
ANAPC10	GACATACCCGAATTTCTTGA
ANAPC10	CCCTTGGCAGCAACTTGAGT
ANAPC10	CTGACCCCAAGCAGTTGGAA
ANAPC10	AGCAAGATCTCAGTCAGAGT
ANAPC10	ATTTAGTGAACATCCAATTC
ANAPC10	ACACCAAACAAGACACCTCC
ANAPC10	TGCTTGGGGTCAGCACCAGG
ANAPC10	CAGTCCTTTCCAACTGCTTG
ANAPC10	GTTCTAGCCAATCACCAGAA
ANAPC10	CCAGTAGAAGAGAGCTCCAT
ANAPC10	CTTGAGTTGGTGGAACCAAG
ANAPC10	GATGTTCACTAAATGAGGCT
ANAPC11	GATGCCACAGTTCTCATCGT
ANAPC11	CGACGACTGCCCGCTGGTGT
ANAPC11	CCCTCCGTAGGCAAGGTGCC
ANAPC11	CGTGCATCTGAGTAGTGAAC
ANAPC11	ACGGCGTGGCCACTTGGCTC
ANAPC11	TACTCAGATGCACGTCTCCT
ANAPC11	TGAAGGTGAAGATTAAGTGC
ANAPC11	GATTAAGTGCTGGAACGGCG
ANAPC11	GTGGCCAACGATGAGAACTG
ANAPC11	GTTGGCCACCCAGAGCCAAG
ANAPC11	GAGCACTGGCCCCACACCAG
ANAPC11	TGCAATGCATGTGGAAGCAG
ANAPC11	GCTGTGCGTGCAGCCACTTG
ANAPC11	GCGACGACTGCCCGCTGGTG
ANAPC11	GCCCCATGTGCCGCCAGGAA
ANAPC13	CATGAGAATGTTCCCCCCAT
ANAPC13	AGCCAAGCGTCAGTTTCCAA
ANAPC13	GGTATTGCGACATCCTCATA
ANAPC13	AGAAGACAAGCTGCCTTATG
ANAPC13	CCTGAACCTGAACAAGACAA
ANAPC13	ATTCTCATGGAGGTACTGTA
ANAPC13	GTGAGGTTCAGAGAGATGGA
ANAPC13	TGAGGATGTCGCAATACCAC
ANAPC13	CTGCAGGAAAATGGACAGTG
ANAPC13	TCAGAGAGATGGAAGGATCT
ANAPC13	GTGCCACCATTGTCTTGTTC
ANAPC2	ATGCCCGTCGCCGGTACTAC
ANAPC2	GAGATGATCCAGCGTCTGTA
ANAPC2	GGTAGAAGAACCTTTGCACG
ANAPC2	AGCCTATCCGCCGCTACCTG
ANAPC2	AGGAGCGCTCGTACTCGCCC
ANAPC2	GCGCGTGCTGGACCCTTCCA
ANAPC2	GGATGTTGGCATTGATGCGG
ANAPC2	TCGGTGGGTGCAGATGGCGG
ANAPC2	CCAGGACCGAGTGTAGCCCG
ANAPC2	TACGCAGGTAGGGATCCAGG
ANAPC2	GGAGCCGGTAGTACCGGCGA
ANAPC2	AGGATGGAGGACCGTTGCCG
ANAPC2	GCCCTCACCTCAGGTAGCGG
ANAPC2	GGCTCCTCCTCAGGACATGG
ANAPC2	ACAGCGTAGACCCCGAACGG
ANAPC2	CGAGAAGCTGGAGGTCCCCG
ANAPC4	TCCTGGTCTGGTCGCCCAAG
ANAPC4	ACAGGTCGGAAAACGCAACA
ANAPC4	CACTTCCATCCAATGCATAC
ANAPC4	CTCCAGTTTCCTGTATGCAT
ANAPC4	CAAAGCAATGAGATCCCGCT
ANAPC4	CGACCTGTTTCCCATCCTTC
ANAPC4	CTAACACAGAAGGAAACCAG
ANAPC4	AAAGACACTGTAGGACGTGA
ANAPC4	CAGGTCGGAAAACGCAACAT
ANAPC4	CTGTTTCCCATCCTTCCGGG
ANAPC4	GGGAGAGAAGCAGCTCCCGC
ANAPC4	GCATTTTGTGAAAAGGCGGA
ANAPC4	CCAGGAAAATAATCTCCTGC
ANAPC4	CTTGGTATCAGCAAGAGCAA
ANAPC4	TAAAATTGCTCGAGTCACAG
ANAPC4	GAACTCATCTTGCACTGATG
ANAPC5	GGTGACGCCGTACAAGATCG
ANAPC5	GTCCTTGATGCCGAACACAT
ANAPC5	CCACCTCGCAGAGCTACACG
ANAPC5	GCTCCGCGTGTAGCTCTGCG
ANAPC5	GTTTCTGCGTCACATGATCT
ANAPC5	AAGAACTTGATGTATCTGTA
ANAPC5	GAAGACGGCAAACAAGCTGA
ANAPC5	GAAGAGGAGGTATCTTGCAG
ANAPC5	GCTGAGCATGAACAGCCTGG
ANAPC5	GGGCAGCGCGATGGTAGGGG
ANAPC5	GTAACCGGTACTCCTTGGAG
ANAPC5	TGAAAACATCTTGGACACGG
ANAPC5	GGAGCCGAAAGCAAAAGTAA
ANAPC5	GGCAGAGCTCGCCCTGCAGG
ANAPC5	GGAGGCAATTAGGATTGCCC
ANAPC5	GCGGCCATACAGCCTCCAGA
ANAPC7	CCTGTACAAGAAGGCTGGTC
ANAPC7	GATCCAAACCGTGCCTAACT
ANAPC7	CCTGACCAGCCTTCTTGTAC
ANAPC7	GATCCCATCAAGTATAGCAA
ANAPC7	TGCTGTGAGTAAGTATACCA
ANAPC7	CAAGAGCAATCAGTACCATC
ANAPC7	TGGGTCTTCAAGACAAACGG
ANAPC7	GAATGTGATAGACCACGTGC
ANAPC7	GAGCCAGTCCAAGTTAGGCA
ANAPC7	CTGATCAGCATGCAGAACCG
ANAPC7	TAGGGAAGACTCCAAAATGG
ANAPC7	CATCCTGCTCTGCAAAGCCG
ANAPC7	GCTGCTGAGGAGCCGCACGT
ANAPC7	GCAGATCTGTACTTCAGAGC
ANAPC7	AAGATGGAATTGCTTTGCTG
ANKIB1	GGCGTGCCAAGCGAGGATGA
ANKIB1	GGCTCCCCATAAGATGTATT
ANKIB1	TTTAGTCTACGAAGATCCTG
ANKIB1	TTACATTATGCTGCTAGACA
ANKIB1	TTGTGCACATTCCGTTTATT
ANKIB1	GAAGCTTTACTTCGAGCTCA
ANKIB1	AAAGGAGCAAAACTTGACCA
ANKIB1	GGTATTCTCACGGGATCCCG
ANKIB1	AAAGCTTCAGCAGTAAAGAG
ANKIB1	ATGCCAACTCCACCACCAAG
ANKIB1	GCATTATACCCACTTGGTGG
ANKIB1	ATGCTGAATTTCAGTATCGG
ANKIB1	GAAACAGATATTCCAGAAGG
ANKIB1	GGTTTTCAGAGCGACTGGCA
ANKIB1	GAGGCAGCAGCATAGTGCAA
ANKIB1	GCATTTGAACACCTGATCGT
ARIH1	AAGATATCACAACCATGAGC
ARIH1	ACTATTTCGTGTCCTGCTCA
ARIH1	TATTTCACTGGCCTTGAATG
ARIH1	AATAACAAATAGCTTTGTAG
ARIH1	AAAACTTATGTCCACATTCA
ARIH1	CATGCCTTCTTCCATTATTT
ARIH1	TGAGGAGGACAGCGGCGCCG
ARIH1	GCCGGGGCATGAGCAGGAGG
ARIH1	GCAGATTCTACAACACATGG
ARIH1	AAAGGCAGCAAGAGATGCAC
ARIH1	GATCTAGGGCAGCCCTGCAG
ARIH1	ATAGTTTGTGCTCAAAGCGC
ARIH1	AGATCTAGAGAATGCCACAG
ARIH1	CTACAACTACGAGTTCGACG
ARIH1	GGACGAGGAGTGCAGTGAGG
ARIH1	GGACGAAGACGACGACGAGC
ARIH2	CAGACTGCCCCATGGTTATT
ARIH2	TGCACCGATTGCACTGTACT
ARIH2	CACACTTCGTGAGCCATTTC
ARIH2	AGTGTGAGCACTAATGTAGT
ARIH2	TTCTGCTCAACTGCTTGTTG
ARIH2	AACAAGCAGTTGAGCAGAAT
ARIH2	GAAGAAGAAGAAGACGACCC
ARIH2	TAGAGGCACAGACATACCAG
ARIH2	GAATCTTCTCGTGAATCCGC
ARIH2	GGGGTCTGACAGCAATGAAG
ARIH2	ATATCTCTGAAACTTGCCAG
ARIH2	GCTGACAGGCCAGAGAGAGT
ARIH2	AGTGCTGCTCCCAGCAGCTG
ARIH2	AGTTCTCGTCAAGGACGGCG
ARIH2	AAGTCCTCTGGTGTACGGAG
ARIH2	GCTGGATGCTAAGATGTCAG
ART1	GGGCCACCCCATGCTCATCG
ART1	TCCTTTGATGACCAGTACGC
ART1	CTGGAAAGGCCCTCACCACG
ART1	ATAGACAAGAAGTGCAAGTC
ART1	CCTTACCTGAATTATCCAGA
ART1	GCTGCTGCTCTGGTTCCTCG
ART1	GGAGTGTCTTGAAGGAGAAG
ART1	GCATTGAACTCCTTGTGCAG
ART1	GTGGTGGAGGTAGTGGGCCC
ART1	GCCCTGCAGCTCCTGGGCAG
ART1	GCACACCTCGGAACACCTGG
ART1	GGCTCGGAGGTAGATGCGGG
ART1	GGTCTCGTCGTGTGATGGGG
ART1	GATTCAGCTGGACATGGCCC
ART1	GGTTGGCCTGGAACTCCGTG
ART1	GTGGCGGGGATGGACGGGTG
ASB1	CTGCACACCGTTGCGAATCG
ASB1	TGTCTACCACGCCTCTCGCG
ASB1	AGTCAGGGTTCGCGCCAGCC
ASB1	CTCCATGATGCAGCTTACGT
ASB1	CAGTGCAGGTCGTAATCTGA
ASB1	GTAGGCTGCGCTGATGTACA
ASB1	GGAGCAGCCGGAAGCACTGG
ASB1	GGCGGAAGCATCCATGGCGG
ASB1	TGCAAGAGGAGAGCTACCGG
ASB1	GGTCCGCGCCAGCTTCGAGA
ASB1	GGGCCGGGCAGACATCCTGA
ASB1	GGACATCAGGAGTCAGGTGG
ASB1	CAAGGGGCAGACCACCAAGG
ASB1	GCAGTGGCCGCGATTCGCAA
ASB1	ACAGCTCCCATGGCCTGCAG
ASB1	GGTGGACGTAAAAGGACAGA
ASB10	CACGTGCCCTCGGACCATCG
ASB10	ATACCAGCGACCCAGAGCGA
ASB10	CGACCCCAACATCGCTGACC
ASB10	CCTCCATCGCTCTGGGTCGC
ASB10	CTGGTCTCTGACATACGAAG
ASB10	GGTGACTCCTGAAACTCTGC
ASB10	GCAGATCTGCTTCTAAGACG
ASB10	GCACAGCTGCAGGCAGCGGG
ASB10	CGACAGCTGCATGGCCACGG
ASB10	CGGCTGGCTGCCACATGCAG
ASB10	GCAGCCGCAGGACTTCCGTG
ASB10	CCACTCTCGCTCCAAACCTG
ASB10	CCAGTCCATCACCGATGCCG
ASB10	GTGGAGCTGCTCCTGTCCTG
ASB10	GCAAGGCCAGACAGTGCCCC
ASB10	TGGTCGGTCCGAGGAAGAAG
ASB11	GCTCGGAACTCCCCTATATG
ASB11	AGGCCAGGTGCACCTCCAAC
ASB11	GTTCGGAGCCAAGGCCCAGT
ASB11	TTCCGAGCTGAGGCACCTCA
ASB11	TGAGCTGCAGCTTCATGAAG
ASB11	ACTTCATGAAGCTGCAGCTC
ASB11	AGAGTGCATGGAGATCCTGC
ASB11	AGCGAGGCAGTCCAATGTGG
ASB11	ATGTGGCCTGCACCTACCAG
ASB11	CCAGTGTCGACCATGGCCAG
ASB11	GAGCTGCAGCTTCATGAAGT
ASB11	GGCATGCCTTGGAGGTCACG
ASB11	GCAAGCATTGAAGAGGGGTG
ASB11	GCTGCTGGAGTTCGGAGCCA
ASB11	GGAGTGGGGTGTCCAGCCAC
ASB11	GCCTCGCTGCAGCATGGAGT
ASB12	TGAAACGTTTGTAACGCTCC
ASB12	TGACAACGACTCCTATACTT
ASB12	AGGCTCTGCGGACGACTAAA
ASB12	TCCACGGTCACTTCTATCAC
ASB12	GTCTTGGGACACGAGCCAAT
ASB12	CACCAAAATCGATTAACAGC
ASB12	GCAGCCCGACAAGGAGGAGG
ASB12	GGAGGAGGACACTGACACAG
ASB12	TGACTGACAGCAGTGAAAAG
ASB12	GAAGCTGGTGCCTCTCCTGG
ASB12	GTAGATGCTACCACCAGGAG
ASB12	GATGGAGGCAGATTTCAAGG
ASB12	CTGCAGGAGCTCCTAGACCA
ASB12	GGACACGAGCCAATAGGCCC
ASB12	GCATTGCTGCTACAGGCCCG
ASB12	AACGCTCCTGGCGCAAAAGC
ASB13	CCGGGGCGGGATGTTTAACT
ASB13	GTGGATGCTCGCAACATCGA
ASB13	TATTGACGTCGGGGCCAATC
ASB13	CACACACTCGATGCTGCCCG
ASB13	CCAAGTTAAACATCCCGCCC
ASB13	CTGCGTGAACCAGGTCACCG
ASB13	GGGGACGCTGTGTACAGGGG
ASB13	TGGCGGCAACATCTACGCCC
ASB13	TCTACGCCCGGGACAACCGC
ASB13	GTGCACGAGGCAGCCCAGCG
ASB13	GCTGCAGGCTCTCACCCCGC
ASB13	GAGGCGCAGGCATCGCAGAG
ASB13	GAGGCTTCTTATTGACGTCG
ASB13	GTAGTACTCGAAGCACTTGG
ASB13	GTACAGGGGAGGGTTGACCT
ASB14	ACCAAGTACCATTCCGCATT
ASB14	AACAGCACAACATGCACCTA
ASB14	AACTCTGTTGAATGATGAGC
ASB14	CTTATAGTCAGCGCTCAAAA
ASB14	TGCACTGCAGCCTTATGCAG
ASB14	TTCATCTATGTCTTCATCGC
ASB14	GAAGCAGCTTGACTGAAGAG
ASB14	AAGTGGACACACTGAAATCA
ASB14	TTACTTGAAGCCGCAAGTGG
ASB14	AATACAAAGCTGACTTCCTG
ASB14	TGGGAGCAAACCACTCACAA
ASB14	GCTGCGTGACTGCTATGACA
ASB14	TGGAGGAAATCCAGATGCTG
ASB14	ATGAGGAGTTCCAGGCACTG
ASB14	CCATCCTGAGGGCTATCTGG
ASB14	GCTCATAGTTGCCCATCCTG
ASB15	CTAGGCGTCGCTGCCGAGTA
ASB15	TGCTGACCATCGCTTGACAC
ASB15	GAATTCCCAGAGTGTCTTAT
ASB15	CAGCATCCTATAAGACACTC
ASB15	TGAACAACAGCTTCATGCAA
ASB15	ACAAATACTTGAGATTGTTC
ASB15	GGCAATGTCCACCTGAGAGA
ASB15	TAAACGACGAGGTAATGCTG
ASB15	GGTCATTTACCAATCAGAAG
ASB15	GTGCTGTTTGAGGCAGCAGG
ASB15	GCAACAAGTAGACAGTTGAG
ASB15	GTGGTCAGAGATACAGGAAG
ASB15	GACTTCAGTTTAGCACACAG
ASB15	AGCTTTGACTGCCAAAGTCA
ASB15	GAGCATATTGAATGACACTG
ASB15	TGGGAATTCAAGACCTGTGA
ASB16	CTCGCCATCGCTACAGCCCG
ASB16	CCTGGAGCATGGCGCCGACG
ASB16	CCCGACTAGCTGTGCGCGCT
ASB16	AGCAGGAGCGACGGTGAACC
ASB16	GGGTCGCGCTGCCTTGCATG
ASB16	CACAAGGATAGGCATTAAGC
ASB16	GAGAGAGCGCAGCATGGAGG
ASB16	GCTGCTGGAAGCAGGAGCGA
ASB16	GGAGACGCCCCTGCACGTGG
ASB16	CCAGCCACTCCTGCTGCAGG
ASB16	GGCTGGAATGGGAGGACCGG
ASB16	GGGTCTCGGCAGGAACGGTG
ASB16	GCTGCAGGTTGCCGGAGAAG
ASB16	GTAGCCTCGGGCTGTAGCGA
ASB16	GGGATCGTGCAGAGGTGCAA
ASB16	GCGCTGAACACGGCGTGCGC
ASB17	ACCATTACTCTTACTCTCGA
ASB17	CCCTTCGAGAGTAAGAGTAA
ASB17	GATATCACTGTTACGAACCA
ASB17	GCCAGTGATCTGTAAATCCT
ASB17	ACCAACAATATGCTCCCAGA
ASB17	GGTTAATAGTTGATTCCTGA
ASB17	GTAACCTGGCACTGATATGG
ASB17	CACATATTTCAGTGAAGTCG
ASB17	GTCTGAGCTACATAAAAGAG
ASB17	GCTTTCTGTCATTTCAGTCA
ASB17	GTGATGCCACTTAATGGGCT
ASB17	AGAAGCAATTCCACAAAGTC
ASB17	CTGAGGTATGTGGACTTGGA
ASB18	ATAGTCGAGCGCGCCCGCGT
ASB18	GACGCGGGCGCGCTCGACTA
ASB18	CACGCCCCTGTGCATCGCCG
ASB18	ATCTGTCCCCGCAGTCATCG
ASB18	GTTCTTCCAGGATGCCAACG
ASB18	GTGAAATCTCCAGCCACGTT
ASB18	GAAGAGATTAAAGTCTGCCC
ASB18	GTTACCTAGCAGCATGCCGG
ASB18	TGAGGGGCTTCAGATGGTCG
ASB18	GAGCAGGTGTCGCACGCAGG
ASB18	GCCGTGCGGCAGAGGTGCAG
ASB18	GGACACGCCGCTGCACGTGG
ASB18	GTGGACGCGAGGAACGGCCG
ASB18	GGGCGCGCTCGACTATGGCG
ASB18	GTGCAGGCGCTGCTCAACCA
ASB18	GAAGGCGTCGGGCCACACGG
ASB2	CCGTTTACTTGGCAACGTGC
ASB2	GCCTGCGGACCCCTTGATAA
ASB2	CGAGAGACACCGCTCTACAA
ASB2	CTCCGCGTTCTTGCGCTCGC
ASB2	AGCCTGCGAGCGCAAGAACG
ASB2	AAGCCCATTGGGGCCCGGGC
ASB2	ATGCAGATCCTGGTGAGCGG
ASB2	AGGTGCTGACATCAACACGC
ASB2	CAAGAATGAGCATGAGGAGG
ASB2	GGCCGAGCGCAACCACGACG
ASB2	GACCACCGCGAAGTACAGCG
ASB2	GCAAGGGGCTGATGACGTCG
ASB2	GCATTGTGCGCAGGCAGCCG
ASB2	GATGGTGGCGGGGAAGGCGG
ASB2	CGAACTCTCAGGAGGTGCAG
ASB2	CGACCAGCGCACCCTGCAGG
ASB3	TTGCATCTCGCTGCAAGTCA
ASB3	CTTGTTCATTGCTGCTCAAG
ASB3	AATGGATCCCATTCTATGTG
ASB3	TTAAGGCTGTTGCTTCAACA
ASB3	TTATTTGTGGCTGCTCAGTA
ASB3	TCCTCATTACAGTAAAGATC
ASB3	GAATTGCACAGTAGAATCAG
ASB3	AGAGGGACACACAAAATGTG
ASB3	GTGGAGCTTTTGCTCTCCAG
ASB3	AATCCAGCAACCAGAAGATG
ASB3	GTTCCATCCACACATAGAAT
ASB3	AGGTTACCTGAAAAGAAGCC
ASB3	AAGGAATGCCAGGATGACTT
ASB3	TGGCTACAGCCCAGACGCCC
ASB3	AAGGTTGCTCATTGGGACCA
ASB3	AAGATCAGGATCTGCCCCAC
ASB4	GGCATTCACGCTGTCCACTA
ASB4	GCATCATGTGCATGAGCACG
ASB4	AGCTATCCCCGATGATGACT
ASB4	GCTTTGCCCCACGATCACAG
ASB4	GTTAAGATCCTCTGTGATCG
ASB4	ATTTACCTCCAAGTCATCAT
ASB4	GAAGACCAACAACCAAGATG
ASB4	ACTCCTGCTCCTTAAAGCGG
ASB4	GCAGCATGCGGCAGACCAGG
ASB4	GATCCAAAGGCAAATAGATG
ASB4	CAAACAAGACAGAGAGATGG
ASB4	AAAGCGGAGGGCCCAGTAGG
ASB4	AGATTTAGTGACAGGGGCAG
ASB4	GGAGCTGGTGGCCTTCTACG
ASB5	CATCTATGCCCCAGGATATC
ASB5	CTTCGTGCAATGGGGTGACA
ASB5	CCATTGCACGAAGCCTGCCT
ASB5	GACATACAAGCTACATAGAG
ASB5	TGACTTGCTGCTTCATGTAG
ASB5	CTACATGAAGCAGCAAGTCA
ASB5	AAAGAAGCTTCCAGATGCAA
ASB5	AGAAATGACTGAGGATGGCA
ASB5	GAAAGGCAACCGCAAGGAAG
ASB5	GTAGGTGCTGACGTACAGAA
ASB5	GCGGCCTCATGCGTTGGGGA
ASB5	TATGGAGTAACCCAAGGACA
ASB5	TAGTGGTGATCGATCTGCCC
ASB5	GTATGGTGCCAAAGCCCAGC
ASB6	CCGGTCCCTCCGATTAACGT
ASB6	ATCACGGGGCCGACGTTAAT
ASB6	GCCCAGTTATGTCGCCAGCG
ASB6	CCGACGTTCTCTTGCGGCAT
ASB6	GATCCACGAGAGTAGCCCCT
ASB6	GTCAATGCCGCTGACAAGCA
ASB6	GGAGCTGCTGGTGCATCACG
ASB6	GAGCAACGCCCTGCTCAAGA
ASB6	TGAGCTGGGGCTGACGCGGG
ASB6	GCGGAACCAGCCGGACATGG
ASB6	ACGGGGCCGACGTTAATCGG
ASB6	CGTTCCTGCACGGCTTCCGG
ASB6	GAATCGCATCCACCAGCGGC
ASB6	CATGCTCTGGCCAGCAGCGA
ASB6	CCAGAGACTCCTGCCGCTCG
ASB6	GGTACTCGAAGATGATCCTC
ASB7	CCGAATGGCCGAGATGCGAA
ASB7	GAGTCCAGCCATTCGCATCT
ASB7	CTAACATCAAGCGTGCAATG
ASB7	AGCTCGCCATTATCCGAGAG
ASB7	GTAGTTCATCAAGTAGCTTT
ASB7	TGATGAACTACCAATTGCCA
ASB7	AGAGTTGCAGATTCAGGCCG
ASB7	GACATCCCCAGCAGCCACCG
ASB7	TGTGGCTGCCCACTACGGCA
ASB7	AGAGGGGCAGACACAAACTT
ASB7	ACGGAGCAGACACGAACACA
ASB7	GTGCGAAAGATGCTAGAACA
ASB7	GTGGTACCTTTATCACTGAG
ASB7	TGTTGGCATTGTGGTCCAGG
ASB7	TGTTACACCATCATTGTCGA
ASB7	CGGCTGGACTCCCCTCCATG
ASB8	CTATGCCGTGCGCCGTAGCC
ASB8	CCGGCTATTCTAAAAGTAAC
ASB8	CTTCCCACATGATAATGTAG
ASB8	GTCAGCATCTGACACCATAC
ASB8	CCTTGATGAGTTCCAGTATG
ASB8	GCAGATGTGAACTGCACTCA
ASB8	ATCATGTGGGAAGGAACGGA
ASB8	AATGTAGAGGACCTCATCAG
ASB8	GCACACTCACCCCTCTGATG
ASB8	ACCATACAGGCACAGTGCAA
ASB8	GGTGTCAGATGCTGACTGTG
ASB8	AATTGTTCGGATTAAGCGCT
ASB8	GTAATCCAGGGCATTGACAG
ASB8	GTGCGGGCTCTCCTAGAGAG
ASB8	GACACCCATCTCCCGCCTGG
ASB9	TATGACTCACCGCCCATCAA
ASB9	AAAAAGCTACCTGGCTGATG
ASB9	AGAGAGATGACCTCCAAGAC
ASB9	CAAGGGACTTTCCTGGCATC
ASB9	TGAATGGTGTGACAGCAGAC
ASB9	CTGACACAAGCATTAAACAG
ASB9	CATGGATGGGAGCAAGCCCG
ASB9	TTAGGAGCGGACGTGAACCA
ASB9	GGTGCCTCCAGAGAGCCCCT
ASB9	GTGGGCTGTGAACATCATCA
ASB9	CAAGACAGGCTTCATGGAGT
ASB9	GGATTTTGGAGCGGACACCC
ASB9	ATGCATGAAGCTGCAATCCA
ASB9	AATAGAGTGGAGTGCCCAGG
ASB9	GGGAATCCTGACCTTTCCCT
ASPSCR1	ACTGCAGCGTCGTGCCCCGC
ASPSCR1	GGCACGACGCTGCAGTCGCT
ASPSCR1	GCACGACCCACCATGTTCTC
ASPSCR1	GCCCGCTTCCCGGAGCCGTG
ASPSCR1	TCACTTCAGATCATATTCAC
ASPSCR1	AGGTTCTGGAGGACACGTGC
ASPSCR1	GAGTGCCTGCAGCACCCCGG
ASPSCR1	GCAGTCGCTGGGCCTGACCG
ASPSCR1	GCACTGCCCTTACCTGATGG
ASPSCR1	GAATCTGGGGAGCTCAGCCG
ASPSCR1	CCGGACGGCTCAAGTCGCCG
ASPSCR1	GGTGTGCCACCCCGACCTGG
ASPSCR1	GGTGACCAAGGCCTTCAGGG
ASPSCR1	GAAGCTGGAGCGCTACCCAA
ASPSCR1	CAATGGGGAAGGGGACCCGG
ASPSCR1	AAAATGGCGGCCCCGGCAGG
ATE1	TATCAGGATCTCATAGACCG
ATE1	TTCCGTCAAGCCAGTACTGC
ATE1	CTTCAGTCACAAGATTTCGT
ATE1	GGCACATTCCATGACAGTAC
ATE1	CGCAACAGCATCATCCATTG
ATE1	TGACGGAAAGATCATTGCTG
ATE1	GAAATTTCTAGCTAAAGGGG
ATE1	CGGCTCGCTCACCATTGGAG
ATE1	TCATAGACCGAGGATGGCGA
ATE1	GTAGGAGAGAAGTTGGGCTC
ATE1	CGTTCTTGCAGTAGCCGCAG
ATE1	GAGTCGGGCAGCCGCTCCAA
ATE1	GCCTTCAAAATCTCACAAGA
ATE1	GTTCCCAAAGGAAGTTGTGA
ATE1	GAACCCAGCTGGAGAACTTG
ATG7	AGAAGAAGCTGAACGAGTAT
ATG7	CTTGAAAGACTCGAGTGTGT
ATG7	GCCCGTTGCTGCCCAGCTAT
ATG7	TAGGGTCCATACATTCACTG
ATG7	GATACTCGTTCAGCTTCTTC
ATG7	GGTGAACCTCAGTGAATGTA
ATG7	ATAGCTGGGCAGCAACGGGC
ATG7	GTATGATGAGAACATGGTGC
ATG7	AGCAACAACATACCACACCG
ATG7	GGAGCAAGCCCGCAGAGATG
ATG7	GGTCAGCAGATGCCACAGGG
ATG7	GAAGCTGAACGAGTATCGGC
ATG7	GCTGCCAGCTCGCTTAACAT
ATG7	TCCGTGACCGTACCATGCAG
ATG7	TGGGAAAAGAACCAGAAAGG
ATG7	GCCCAAGGCTCTGGCAGCAG
ATRX	TCGTGACGATCCTGAAGACT
ATRX	ACTATGCAGAGCTTGCCAAA
ATRX	ACATACTTTGTTACAATTGA
ATRX	ATTCTTCTGATGAGTGTGCA
ATRX	CTTGCAATGAATCAAAACAC
ATRX	TCAGAAAAATCCAAGTCTTC
ATRX	GCAGTGACCAAGTCCAACAA
ATRX	TCAGTTGATCATCAAGGGGA
ATRX	GTGAATCCGAAGATGAACAG
ATRX	TAATTCTGAGGAAGAAGAGG
ATRX	GGTGTGGGCAATAATAGTGA
ATRX	TGATTCATTGCAAGTCGTGG
ATRX	GATGGAAAACAGCAAGGAAG
ATRX	AGGGTGTAGTCTTTACACGT
ATRX	AATGCTAGCAATCCTCAAAG
ATRX	ATGATTTAAAGACTCAGGCG
ATXN3	ATCCTCAATTGCACATCAGC
ATXN3	TCAACAGTCCAGAGTATCAG
ATXN3	ATCCTGAGCCTCTGATACTC
ATXN3	TGCCTGAATAACTTATTGCA
ATXN3	ACAGCAGCCTTCTGGAAATA
ATXN3	CTGTCATCCATATTTCCAGA
ATXN3	CGAGTGTTAGAAGCAAATGA
ATXN3	AATGTTAGACGAAGATGAGG
ATXN3	AAGATGAGGAGGATTTGCAG
ATXN3	ATGAGGAAGCAGATCTCCGC
ATXN3	CCCAAGTGCTCCTGAACTGG
ATXN3	CTGGTGGCTGGCCTTTCACA
ATXN3	CAAGATATGACACAGACATC
ATXN3	TAGAGTCCATAAAACAGACC
ATXN3	TACTTAGCTGAATAGCCCTG
ATXN3	AGAGTTCACATCCATGTGAA
AUP1	AACCTGCGAAGGACGCTGTC
AUP1	CTGCTGCTCTACGCGCCAGT
AUP1	GTGTCCCCAGATTCGTAGTG
AUP1	AGAGATTCTGTGCTTCCACG
AUP1	GAGCCCTAGCACCGCACACA
AUP1	GCTAAACCCACCTGAAGCGC
AUP1	GAGACCAGCACACAAAGCTG
AUP1	GAAAGAGGCGCAGGACGAGG
AUP1	GAGGCCACCAATGGCCGGGA
AUP1	ACACTCACCACAGAGACCAG
AUP1	CCTGGGTCTCAGAACTGCTG
AUP1	GGAGGGAGGGAAAGAAGACT
AUP1	GCCCGCGTCGGAACCTGCGA
AUP1	GGAGTCCGGAGTCCTCCTGC
AUP1	GCTTCATGGAGATGAATGGG
BAP1	TCAAATGGATCGAAGAGCGC
BAP1	CCAAGGTAGAGACCTTTCGC
BAP1	TACCGAAATCTTCCACGAGC
BAP1	ACCCACCCTGAGTCGCATGA
BAP1	TGAAGTCCTTCATGCGACTC
BAP1	CGACCTTCAGAGCAAATGTC
BAP1	AGTGGACAGACAAGGCCCGG
BAP1	GAACCGTCAGACAGTACTAG
BAP1	GGCGGACTGGAACTCGGCTG
BAP1	TGACTATGAGGATGACGAGG
BAP1	GAAGGGAACAGGGAAGCCAG
BAP1	GAAGCTCAAAGAGTCCCAGA
BAP1	GAGCGGATAGGCGAGCGCAG
BAP1	ACAGGGCTGGAGGGCCGCGT
BAP1	CCAGGGGTCCAGCAGCCCAG
BAP1	TGAGGCGTGCCTCAAGGAGG
BARD1	GCGGGACGATGCCGGATAAT
BARD1	GGTCGAGCGCGGCGCGACTG
BARD1	ATGTCCAGTGTGTTACACCC
BARD1	CTACATGACAATGAGCTGTC
BARD1	GATGTGAGCACATCTTCTGT
BARD1	TCACATCCTCCTAAACACAC
BARD1	AAGTTGGTGGTACATCAGGG
BARD1	GGGCAACAGCTTCATTGCTG
BARD1	TGAGTCATTTTGATACCCGG
BARD1	AACACTGGGCAGCGTAGGGA
BARD1	GCGCCCGCCATGGAACCGGA
BARD1	CAAGTCTTGTATCCAGGCCG
BARD1	AGAGGAATCTAAGCAAAAGC
BARD1	TGAGGACTGGAGATAACAGA
BARD1	AGTCTCCAGACACTAAGAGC
BAZ1A	TTTCATGTAAGCGCGAACGA
BAZ1A	TGTGCTGTGACGGGTAGACC
BAZ1A	CTCCCTCTTCGTCTGTTAGC
BAZ1A	TTGACTAATATGTATTCGTT
BAZ1A	CACTTTATACTTGAATAGTA
BAZ1A	TTGTTAAAGCAACACAAATC
BAZ1A	GAATGAAGACGTAGAAGAGA
BAZ1A	GATGTGGAAGACAGTATGGG
BAZ1A	AGTCCTCGTAGAAAACGCAG
BAZ1A	AGGAGTTCTGGCCGACAGGG
BAZ1A	TGTGAGACAGAAGCCGCCCG
BAZ1A	CAACACTGTGAACCACAAGA
BAZ1A	GGACTGAAGATAAATGTGGG
BAZ1A	GCATCACCAAAGATTTCAGG
BAZ1A	CAGAACAACATCGAAAAGAG
BAZ1A	GACCCAGGATCACATAAAAG
BAZ1B	AAAGGTACAGTGAGCGCATT
BAZ1B	CAGAGAGTATGAAGCCCGCT
BAZ1B	GATTGTGAAGATTCATCCTT
BAZ1B	GAACTCCAGTCAGATTGCTC
BAZ1B	AGTTTCACATCATATTTGTG
BAZ1B	CTTCCTACTTCATTAAAAAA
BAZ1B	GATGTTCAGGAGGAAAGCGA
BAZ1B	GAAAATGGTAGAGGAAGCAA
BAZ1B	GGCCTCCTGAGTGTGCGGGA
BAZ1B	GGGAGATTTGGAATTCCCTG
BAZ1B	GCCTTGAGTGCAGATAAGGG
BAZ1B	AGTATGTCATGAGGATCCGG
BAZ1B	GAGACAACCACACCCAAACA
BAZ1B	GGAGTTGCGCCTGGCAGTAG
BAZ1B	TGAGAGTGATGAAGAGGAGG
BAZ1B	GGAGGAAGAAGATTATGAGG
BIRC2	GAGTTCTTGATACGAATGAA
BIRC2	TGTCATGATGAATACACCTG
BIRC2	CAAAGTAAAATCCTGACAAC
BIRC2	CATGGGTAGAACATGCCAAG
BIRC2	ATATCCTCATCTTCTTGAAC
BIRC2	GGCTTGAGGTGTTGGGAATC
BIRC2	ATGCTATGTCAGAACACCGG
BIRC2	TGGAGACGTATTCTTAGAGG
BIRC2	CAAGCTACTATGTTCCAAGG
BIRC2	AAGAGGGTTTGGAGAAAGGC
BIRC2	AATGGGCTTTAATAGAGACC
BIRC2	CTGAGACAGGCACCCCGGCG
BIRC2	CCAGCTCTTGCCAATTCTGA
BIRC2	GTAGCCTGCTTTGCCTGTGG
BIRC2	ACCTGTGGTTAAATCTGCCT
BIRC2	ACATATTCAACTTTCCCCGC
BIRC3	GTTAGTAGACTATCCAGGAT
BIRC3	TTACCCTCATCTACTTGAAC
BIRC3	CCTACCTGTTCAAGTAGATG
BIRC3	GACTTGTGTAATTCCAATCC
BIRC3	CTATCCACATCAGACAGCCC
BIRC3	AAAGTGCCATTCTATTCTTC
BIRC3	GAGAGTTTGAATAAGAGCCA
BIRC3	ATTGAGCAATTGGGAACCGA
BIRC3	AGGAACCCCAGCAGGAAAAG
BIRC3	CTTCCGGGTACAGAAAACAG
BIRC3	AGAGTGGCTTGCTTTGCCTG
BIRC3	CTGGATAGTCTACTAACTGC
BIRC3	CAGAGAGTTTCTGAATACAG
BIRC3	ATGCTGGATAACTGGAAAAG
BIRC3	GAAAACAGTGGATATTTCCG
BIRC3	GTTGGCGACAGAAAAGTCAA
BIRC6	GTAGTGTATGCCTCGTTTGT
BIRC6	ACTCACCAAGGTTCATCAGT
BIRC6	GCCCACCTATAGCCTACATG
BIRC6	TGTATAGTGAAGCTAACAGA
BIRC6	CTTATCAGCATGTTTAGAAA
BIRC6	TTCTTACCTTAGCAACTTTG
BIRC6	GAGGCTGCCAAAGTTTGCAG
BIRC6	GAGCAGAGGAATGTTAGTGG
BIRC6	GAAGTAAATCACAGCCCCGG
BIRC6	GGACAGGCTAACACCAATGG
BIRC6	AGTGTGATTGTGCTGAGCGC
BIRC6	GAGTGGCTGGTGCTGCGGGA
BIRC6	GGATGGCGTTGAGCGCAGGG
BIRC6	GGGACCATCAAAGTCATCGA
BIRC6	AGACTCACCACTGAGCGCGG
BIRC6	CAAGGAGACCAACTTTGGCG
BIRC7	CCGGTACCTGGGGAACCACT
BIRC7	GCGTCTTCCGGTTCTTCCCA
BIRC7	CCTGGACGGAGCATGCCAAG
BIRC7	GGTCCAGTCTGAAAGTGCCC
BIRC7	CTCTCACCGGAGGGGGCCAC
BIRC7	AGACTTTGTCCACAGTGTGC
BIRC7	GCTGCGGCCCCTGACAGAGG
BIRC7	GGAAGAGGAGGAGGGCGCCG
BIRC7	GCAGCAGCCAGCAGCTCGGG
BIRC7	GGCCTGCAGAGCTGGAAGCG
BIRC7	GGGCAGCTCAGGGTACCCAG
BIRC7	AGTGCCAAGTGCCTGCACCG
BIRC7	GACCATCACCGGCTGCCCAG
BIRC7	GGTCCCACGCAGGAGCGCTG
BIRC7	GGACAGGGCTGCCCAGAGAG
BIRC7	ACTCCTCAGAGCCCATGCCG
BMI1	AACGTGTATTGTTCGTTACC
BMI1	TCCTACCTTATATTCAGTAG
BMI1	AAAGGTTTACCATCAGCAGA
BMI1	ATTGTATACAAATTAGTTCC
BMI1	GCAGCTCATCCTTCTGCTGA
BMI1	CTAATTTGTATACAATATCT
BMI1	GATTGATGTCATGTATGAGG
BMI1	ACAAAGCACACACATCAGGT
BMI1	CAAAGAGAAATCTAAGGAGG
BMI1	TACTCACTTTTGAAAAGCCC
BMI1	TATGCTACTTACCCTTCTCC
BMI1	CTCTAATGAAGATAGAGGAG
BMI1	GCATCACAGTCATTGCTGCT
BMI1	GGAACCAGCAACAGCCCCAG
BNIP3L	CCCGACACACCTGAGAGCTA
BNIP3L	AGCCCTTCGCCACAAGAAGA
BNIP3L	CTTAAAGACACAGAACGTTT
BNIP3L	TCAGGACAGAGTAGTTCCAG
BNIP3L	CTACCCATGAACAGCAGCAA
BNIP3L	GTTCTGTGTCTTTAAGCATG
BNIP3L	AGAAGGAGAGAAGGAAGTCG
BNIP3L	AAAGTGGAGCCATGAAGAAA
BNIP3L	TCACTGTTGAGGCCGGCCGG
BNIP3L	TTGTTGTGCAGGGGCGGCGG
BNIP3L	TTGTGGATGGAGGATGAGGA
BNIP3L	CGAGGCTTTGAAGAAAAGTG
BNIP3L	GAACACCTTCAGAAATTCTG
BNIP3L	CAACAACAACAACAACTGCG
BRAP	TCGCCTGTCCCCGCCGGCTT
BRAP	TGTTATCCGATTGGAGCTCG
BRAP	AGCTGTTTGGACGGAGAATC
BRAP	AGATTCGCTGAGATTCCAGC
BRAP	ATAATCGCTACTTTCTCTCC
BRAP	AGCCGGGGAAATGTCTGATG
BRAP	GGCGCTGAAGCCGAAGCCGG
BRAP	GGGCGCCAGCCTCCCAGTGA
BRAP	GACACTGGCTGTGGAAGCTG
BRAP	CAAGATAGTTCGGATAGAGA
BRAP	GATAGAGAAGGACACAGCAG
BRAP	GAACACTCGCCTGTCCCCGC
BRAP	CAGTCAGGTCCATCACTGGG
BRAP	CGAGTCTGGGACTATGCTGG
BRAP	ACAACCAGTGACACACTCAT
BRAP	GAGACCATGAAGTCCAACCC
BRCA1	TGCTAGTCTGGAGTTGATCA
BRCA1	AAATCTTAGAGTGTCCCATC
BRCA1	TGAACCCGAAAATCCTTCCT
BRCA1	GGTTTCTGTAGCCCATACTT
BRCA1	AAACTTACTTGCAAAATATG
BRCA1	AGTTTCTATCATCCAAAGTA
BRCA1	GAACTCTGAGGACAAAGCAG
BRCA1	GATAAAGCTCCAGCAGGAAA
BRCA1	GGTCAGGCCAGACACCACCA
BRCA1	AAAGCGAGCAAGAGAATCCC
BRCA1	GAAGCTGTGTTAGAACAGCA
BRCA1	GTCAATGGAAGAAACCACCA
BRCA1	GCTGCACAACCACAATTGGG
BRCA1	GATGCCTGGACAGAGGACAA
BRCA1	TCTGGGGCTCTGTCTTCAGA
BRCA1	TTGGGGAACTTTCAATGCAG
BRCC3	TCTAGTTGAACGATGATACA
BRCC3	ATACTTACTCTGAACTCTTT
BRCC3	ACAAGCCATGTACCAGATGA
BRCC3	GTTCTTATCTTCTATGAAAC
BRCC3	CACTTGCTTCCAATCCATAC
BRCC3	CAAAGCCTTGATCCATCATC
BRCC3	AATGGGGCTGTGCATAGGGG
BRCC3	GAGCGTGGTTGAGACAAACG
BRCC3	GGTGGTGCAGGCGGTGCAGG
BRCC3	GGCCAAGATGGCGGTGCAGG
BRCC3	GAAGCTGCAGACAGCTGCTC
BRCC3	AGGAGCAGGATGCGTATAGG
BRCC3	CAGAGAAGGAGGAAGTAATG
BRCC3	GCTCTGGAGAAATTTCTACT
BRCC3	ACTGTTTGGCCTTCACATGT
BRCC3	CCTTCTCTGTGCTCAGAGCG
BRE	CAGTTTAAATCGGTCACAGT
BRE	CTCCCCTTTCATATCTAGCG
BRE	ATTCGGTTCAAGGCCACTTC
BRE	AAACTGCACATACCATATGC
BRE	AGTACTCACCTGCAAAGCTG
BRE	GCCAGACCCCTCAGCTTTGC
BRE	TCTGGTATTCAAACATGAGG
BRE	GATATGAAAGGGGAGAGCAT
BRE	GACCACGCTAGATATGAAAG
BRE	GGAGGGCCACATCTTCTCCA
BRE	GAGGTGACAAGTACAGCTTG
BRE	TCTCCAAAGATAAAATCGGG
BRE	TGAGGCGGGAGCTCTCCCGG
BRE	AAGGATGTAAATGAAGACCC
BTBD1	GTGGGACGAGTGATCGAATC
BTBD1	TCGGTCAATGTATTCAACTC
BTBD1	TACCTGAGTAAGTAACATAA
BTBD1	AATTCCTCAATTGTCATCAG
BTBD1	GAAATACGCAGTCCCAGCCT
BTBD1	GGGTTTACTGATATTGATAT
BTBD1	AGAGAGGACGGTGAGGGCGG
BTBD1	TCAGCAGCTCCGAGTTGAAG
BTBD1	CAGCAGCGCCAGGAAGGCTG
BTBD1	AGACAAAGACTAGCAAGCTG
BTBD1	GACAAAATTCCAGATTGAGC
BTBD1	AAAGCCGCTGGGGTTACAGT
BTBD1	TAGAGAGGTTCCCGCTGCAG
BTBD1	CAGCAAGTAGAAAGCCGCTG
BTBD1	GATACCGGCTTTAGTTGTGA
BTRC	TGGTACCGAGTGACCTCTGA
BTRC	CCTACTGAAAGCTCGGGGAT
BTRC	ACGAGTTTATGTGCCCATGT
BTRC	GTATGATTGTGCCCAAGCAA
BTRC	TTGCTAAACATACTGTTTCT
BTRC	TATGAAGACTGAGAATTGTG
BTRC	GATTATGGACCCGGCCGAGG
BTRC	AGAGGCCTGGCAGAACGAAG
BTRC	GGCCATATCCCATACAGCAA
BTRC	CAACTGACATTACCCTCCGG
BTRC	CTACAGACAAAACTTGCCAA
BTRC	GTGTCAAATACTTTGAGCAG
BTRC	GCGTTTCAATAATGGCATGA
BTRC	GTCCGACCAGCACCCTCCGG
BTRC	GATAACAAGAGGATAGTCAG
CACYBP	TTGCAGGTCATTTGATCTTT
CACYBP	CACCGTATAGCCCGTTGTAA
CACYBP	TAATGAAAAACCAGCTGCTG
CACYBP	ATGCACCTGCACATTCTCAG
CACYBP	AAAATCTACATTACCTTAAC
CACYBP	TGAACTGCCTTCCACAGAGA
CACYBP	AACCATTAATAAAGCCTGGG
CACYBP	CTTCTCTCTTGATTCCACCC
CACYBP	ACTTACCTCTTCTGAAGCCA
CACYBP	AAGGTGGGATTACCTGACCC
CACYBP	TGTGGTTGCTCCCATTACAA
CACYBP	AGTTCCCACTGAGAATGTGC
CACYBP	TGCAGGTGCATTTCACAGAG
CACYBP	TCTCTTGAAACCCATCTCTG
CACYBP	GAAGCAAGCCAAAGGAGACA
CALCOCO2	TGCCAGATACTACCAGTGTC
CALCOCO2	AACAAGAACTACTCAAATGG
CALCOCO2	AATCAGAGTGGATCAGCTTC
CALCOCO2	CAACAAATCAGCTAAACAGC
CALCOCO2	CCACCTGCAATTTCTGTCCT
CALCOCO2	CTCCTCATCACCCCAGACAC
CALCOCO2	GAAGAAGCTCGAGCAGACAG
CALCOCO2	GTACCTACTTCAGATGAAGG
CALCOCO2	AATACTCATCATCCTTGGGC
CALCOCO2	CAGTTAAACTGAGAAAGAGG
CALCOCO2	GGAGGCGCAAGACAAAATCC
CALCOCO2	GATGAGGATGGTGTGGTCCG
CALCOCO2	AGAAAATGAGGAAGACATCC
CALCOCO2	GTCCTCAGAAAATGAGAAGA
CALCOCO2	GCAGAGACAGAAAGAGAGAT
CALCOCO2	CAAAATCCAGGACTTGCCTA
CALR	GCCGCACAATCAGTGTGTAC
CALR	CCGGCTCCTTGGAAGACGAT
CALR	CACCTAGGTCCCGACATCTG
CALR	CCCTGATGCTAAGAAGCCCG
CALR	CCCAAACTCACCTTGTACTC
CALR	GAAGATGACATGAACCTTCT
CALR	GTAGACGGCAGGCTCGGCGA
CALR	AAGGAGCAGTTTCTGGACGG
CALR	TAGACGGGTGGACTTCCCGC
CALR	CAACAAAGGCCAGACGCTGG
CALR	GAAGATTGACAACAGCCAGG
CALR	GGAGTTTGGCAACGAGACGT
CALR	GAGGCCGAGCAGCAGCGGCA
CALR	CGAGGACTGGGATGAAGAGA
CALR	TCTGGGTTGTCGATCTGCCG
CALR	CAACGATGAGGCATACGCTG
CAND1	TCACCTAAAGTCCTTGTCGC
CAND1	GTACCACATTTCCAATTTGC
CAND1	ACATGAGGATATACTTCCTT
CAND1	CCTTCTTACAAATGATTCAA
CAND1	CCTTGAGAAGATAATTCCTT
CAND1	TCATCATCGTAATTATAATT
CAND1	GAACTTCCTCCAGCTTCCAG
CAND1	GACAGGTCAGAATTGAAGGA
CAND1	AAAGCACTGTGAGTGTGCAG
CAND1	ATCAAGTACCCCTTAAGCCG
CAND1	GGCCATCTGGTTATGAGCTG
CAND1	CCAACACAAGCCACCACTGG
CAND1	GGAGTTGCATCAAACGAGGA
CAND1	GAGGCCTGTTCTGGGAGAAG
CAND1	TGAGATCACCCTTATTGCAG
CAND1	TATTAGCTCTGCATCAGTGG
CAND2	GGTCAGCGAGCTCGACGAAG
CAND2	CCGCACCCTGATCCAATGTT
CAND2	CCTTCTGCAACTCCGACATC
CAND2	CGAGGACAGCGAGCGCAAGG
CAND2	CCATACATACTTCCTCAAGA
CAND2	GGTTGCAGAAATCCTCCACC
CAND2	GCTGGAGATGTGGAAGGCGG
CAND2	GAAGAGGTCGGTGCTGCAGG
CAND2	GATGCTGCTCCGGCTCCTGG
CAND2	GGTGCGGATGGCAGTCGGGC
CAND2	AGAAGGCCTCAAAAGCCTGG
CAND2	GGGATGGCTGGAGGCCATGG
CAND2	GGACACCCGCCAGCTCGGTG
CAND2	GCTGGGCACCGAACCAGCTG
CAND2	GCCACACAGGCCATCACAGG
CAND2	ACGGCCTGCACGGCAGACGG
CBL	CATCTTTACCCGACTCTTTC
CBL	CTATTCTTTAGCGCCAGCTT
CBL	ATCTTCTTGTCCACCGTCCC
CBL	TCGGGTTCGGGTGGCCTGAT
CBL	TCCCCAGGACAATAGTCCCT
CBL	GCAAACCATAAGCCTCTTCA
CBL	GACGGTGGACAAGAAGATGG
CBL	GATTACTAAAGCAGATGCTG
CBL	GAGGGAACACATACTCGCTG
CBL	AAGGCGGCTAGAGGGGACAG
CBL	GCAGCCATGAGTCTCCAAGG
CBL	GTTGTGTCAGAACCCAAAGC
CBL	GGCCTCCAGCCCAGAACTGA
CBL	GATGTAAAGATTGAGCCCTG
CBL	GGGGCCATGGAGAATGGAGA
CBL	TATGGCCGGTCTGGAGGCGG
CBLB	TGCACAGAACTATCGTACCA
CBLB	TAATCTGGTGGACCTCATGA
CBLB	TGATACGAAAGTTATCTCCC
CBLB	AAAGTCTTACCTTCCGGGTT
CBLB	TTCCGCAAAATAGAGCCCCA
CBLB	CGTAAATGCTGATATGTATC
CBLB	GGGATGTCGACTCCTAGGGG
CBLB	GGAGGAGGAGGAGAAAGCCG
CBLB	GGAGGATCTCTTAAGGGAGG
CBLB	GGAGGTCTTTCAGGTGGCGG
CBLB	TAGTCCCAAACACATCCCGA
CBLB	AGGAGGGTGGTAACTGGAGG
CBLB	GAAAACAAGAGACCCAGTAG
CBLB	GTGAATTCAGGGAAACAGGG
CBLB	GAGGTGGGAGAGATGGAGGG
CBLB	AGAAACCCTGGTGGTCGAGG
CBLC	AAGAGCAATGCGTCGACCCC
CBLC	GGTCGACGCATTGCTCTTCT
CBLC	GCAGCGCATCCACGTGTCAG
CBLC	CGTGCAGCTCTGCGTGCATG
CBLC	GTGTCCACAGTACTTTCCCC
CBLC	CCCAGCTACCTCTACCCAGA
CBLC	GCTGCACGCACTCTTCCCCG
CBLC	GAGGGACTCAAACTCAGCCC
CBLC	GAGAGGTGGCCCATTCTCGG
CBLC	AGGGTGGCAGGTGCCCAGGA
CBLC	GCTGCAGGTGAGGTCAATGG
CBLC	GAAGACGTCGAACTCGAAGA
CBLC	GACACGTGGATGCGCTGCTG
CBLC	GCCGCTGCGAGATCAAGGGC
CBLC	GGGAACAGCAGTGACCAGGA
CBLC	CAGCAGGTCCCGCAGCGAAG
CBLL1	GCAAATCAGCGAAGATTTCC
CBLL1	ATGCCTGCAAAGGCTCCACC
CBLL1	GAACTCAAAGAACTATAAAC
CBLL1	ATACCTGAAAGTCCCAAAAA
CBLL1	GTTCATTTCTGTGACAAGTG
CBLL1	CACTTGTCACAGAAATGAAC
CBLL1	AAATTACCTTCATCACCAGG
CBLL1	GAAGAACGGTATGACTGTAA
CBLL1	AATAGTTCTGGATCCTTGGG
CBLL1	TATAAACAGGATGCCTGCAA
CBLL1	AGGGAGATAAGATGTGTCCA
CBLL1	AGCCGAATCATGGATCACAC
CBLL1	GCAGGTGCTGGGGCAGGAGG
CBLL1	GGAGTACCTGCAGCCTGGGG
CBLL1	GCAGAGGTCATTGGTGGAGG
CBX4	GAGGCAGTTCGCGGTGACGT
CBX4	CGTCGGCTGCCCGCTTCTTG
CBX4	GTATTCACCTGCACCACTAG
CBX4	CCCTTGCAAGATATAACACG
CBX4	GCCGAAGCCCAAACCGCTAG
CBX4	TGCTGATCGCCTTCCAGAAC
CBX4	TGGCGAGCACGTCTTCGCGG
CBX4	GGAACGGCAGGAGCAGCTGA
CBX4	ATATAACACGTGGGAACCGG
CBX4	GAGTATCTGGTGAAATGGAG
CBX4	GGAAGGCGATCAGCAGCCTG
CBX4	TGATGGGATATCGGAAGAGA
CBX4	TGGAGAGCATCGAGAAGAAG
CBX4	CGAGAAGAAGCGGATCCGCA
CBX8	CCCTTAGGCGAACCCAGCGC
CBX8	CCGGGAGGGCCTTCGAAACA
CBX8	CTCTATGGCCCCAAAAAGCG
CBX8	CTGCGAGCAAGCGAGCATCC
CBX8	GCATGGAATACCTCGTGAAA
CBX8	TCGCTTGCTCGCAGCCTTTG
CBX8	GTACAGCACATGGGAACCGG
CBX8	ACTGCCAACCTACTTTGAGG
CBX8	ACCTCGTGAAATGGAAGGGA
CBX8	CAACATGGAGCTTTCAGCGG
CBX8	CCGTATGCGCCGCTTCAGGA
CBX8	GGAACCGGAGGAAAACATCC
CBX8	CGGCCGAAGCCCTCCTGAAG
CBX8	TTTCTCCAGGGAAAGAGAGA
CBX8	GAGGAGGAAGGTTTTGGGCT
CBX8	GGGTCTGTACCTTTCCTCAA
CCDC50	GAACGTTCAGCGGAACCGTT
CCDC50	AGATGATTTCTCCCGCTCCT
CCDC50	ACAGGTCTTTGTAGCGCTTC
CCDC50	GATATCATAGGCTACCCAGG
CCDC50	GGAAATCGCTCGACTTCTAA
CCDC50	TTCATCTTGAGCTACTTGAG
CCDC50	GGTCCAGCATGATCTCCAGG
CCDC50	AGAGGAAGATCTGAAAGCGC
CCDC50	GTAACTATCTGCATAAGCAC
CCDC50	AAGCTGCCTGGAGTCAAGGA
CCDC50	GCAGGCTGTGAGCCAGGGTG
CCDC50	CAAACCAGCAGAGTTCCACA
CCDC50	GGTGGCTAAGCAGCTCCAAG
CCDC50	TCTGTCATGATAGGTGGTGG
CCDC50	TGTCCTGGAGGACCACACCC
CCNF	ACTTACGGCCTTCATTGTAG
CCNF	GCTTCTTCAGTCTCGCTGAG
CCNF	TGGGTGCCGCACCTTTCATC
CCNF	GACTTACAGCTCGGACGGCC
CCNF	CTCCTTATTCTTCGCTTTGT
CCNF	ATAGCCTACCTCTACAATGA
CCNF	GAAGAGCCAGATGAAAGGTG
CCNF	GCAGCAGGGAGAGCTCGCAG
CCNF	GAGGGCGAGAAGGAGGGCGA
CCNF	GCAGCTGGCACTCTGCCCTG
CCNF	AGAGATCCTGACCATCCGGG
CCNF	AAACTCACCACTTCTTATGG
CCNF	AGGGAGAGCTGAGGAAGGCG
CCNF	CTGGCTGGACAGCTCCGCAG
CCNF	GAAGGCGACCAGGAGAGTGA
CCNF	GCAGGGACTTACAGCTCGGA
CDC16	AACATGCCAGAAGATATCTC
CDC16	TTAGGTGTCTTGGTTTGCAG
CDC16	TTACATGGCACCTAGCTGCA
CDC16	CATGTCGTTACCTTGCAGCT
CDC16	ATATTACTTACAGGATTACT
CDC16	TTTCTATCTTTCTCATAAAC
CDC16	GAGTGAGCACGACCAAGCGA
CDC16	GTAGAGCTGAATAAAGCCAA
CDC16	AAAGTAGCTTCACTCTCTCG
CDC16	CTATGGACATTCATTTGCGG
CDC16	TCAACACCAGTGCCTGACGG
CDC16	GGGCAACTTTGAAAATGCTG
CDC16	GCGCCGCCATGAACCTAGAG
CDC16	CGTCCGGCAGTACCTCGACC
CDC16	GAGCCAACCAATAGATGTCC
CDC20	TTCCCTGCCAGACCGTATCC
CDC20	TTTCAGGCGCATCCAGGATA
CDC20	ACAGAGGATATATATTCCCC
CDC20	TCTGACAGACCTGAACCTTG
CDC20	GCCAGGAACATCAGAAAGCC
CDC20	TCCACTGAGCCGAAGGATCT
CDC20	GCGCTGGCAGCGCAAAGCCA
CDC20	GTAATGGGGAGACCAGAGGA
CDC20	CAGTGCTGCCCAGATGGAGG
CDC20	CCAGGAACATCAGAAAGCCT
CDC20	GCCAACCGATCCCACAGCGC
CDC20	GTAACGGCAGGTCTTCCGGC
CDC20	CAAGTTATCATTACCACCAC
CDC20	ACCGTTCAGGTTCAAAGCCC
CDC20	CAGGGAAGGAATGTAACGGC
CDC23	GTGTTCCAGGTCGGCGGAGT
CDC23	ACCGCCTCCGCCTATTACAG
CDC23	TGGTGTGGTGCTTCGAAAAC
CDC23	TAACCAGGCTCCCCAATGCA
CDC23	GCCTACTACACAGTAGCAAA
CDC23	AATGGCTGCGAGTACCTCCA
CDC23	GAGTACCTCCATGGTCCCGG
CDC23	AGAGTTGCAGTTGATAGAGG
CDC23	CGAGAAACTCAATCAACTAG
CDC23	TTATTGGAGAGCTTACGCCG
CDC23	GGAAATAGTAGAACACTTGG
CDC23	CTTACCTCTGTAATAGGCGG
CDC23	GGATATGGATGCCTATACCC
CDC23	AACCAGGCTCCCCAATGCAA
CDC23	CCTGATCACAGACAAAGAGA
CDC23	GTTGCCTATCACAATATCAG
CDC26	TCAGACCCGTAAGAAACAGA
CDC26	TTGACTTCAGTATGCTGAGA
CDC26	TGTCATCAAGCTTTAGCTCT
CDC26	AAATTGAGATGAACGATTAT
CDC26	AGAGTTTGAGAACATTCGAA
CDC26	GAAGTTGTAGGAGGCAGTGA
CDC26	GAACATTCGAAAGGACCTGG
CDC26	GAAGATGTGGAAGTTGTAGG
CDC26	GTAGGAGGCAGTGATGGAGA
CDC26	TTAGCAGTGATCCCAAGAGC
CDC26	AACGATTATTGGGCTTGGGT
CDC26	GGGATCACTGCTAAGCCCAA
CDC26	AGTGATGGAGAAGGAGCCAT
CDC26	AGATGAACGATTATTGGGCT
CDC34	CTTCTACGACGACTACTACG
CDC34	GCGCTCACCTCGTAGATGTT
CDC34	CACCTTCTCGCCCGCAAACG
CDC34	GGTCGTCCACCGGCGGGTGG
CDC34	AAGGTGGACGCGGAGCGTGA
CDC34	GTGGCACCCTAACATCTACG
CDC34	GGGAGCTGCCCTCAGAGAGG
CDC34	CCACTTCCTGTACATCACGG
CDC34	AGGAAGTGGAAAGAGAGCAA
CDC34	GGGCACTAGCGGCCGAGCCA
CDC34	CAAGGGGCTGCAGGAAGAGC
CDC34	GGGATTCCGCGTGACACTGG
CDC34	GGGCGATCTATACAACTGGG
CDC34	GTCAGGAACCGAAAGGCTGG
CDC34	GCTTACCTGACGTTCTGCGT
CDC34	GGAGATCACACTCAGGAGAA
CDCA3	TGGCACCCTGACACTACGAC
CDCA3	CCTTTACCTGTCGTAGTGTC
CDCA3	GTCCGTGCAATACCAAGAGT
CDCA3	TCTAGACCCCCCAAGCCCAC
CDCA3	GACTGAGTTCCCCTCCAAAC
CDCA3	ACACCTATGAAGACCAGCAG
CDCA3	GGAGGGTCTTAAACATGCCC
CDCA3	GCGTCCCAGTCACACCAGCG
CDCA3	GCCAGATGCTTGTTGTGCGG
CDCA3	ACAGCCAGGCCTACCAGCAG
CDCA3	ACAGATAACTGGGTACCCAG
CDCA3	ACAGCCCACAGAAACCCCTG
CDCA3	GGAGCTCTGGCTGGCCACAG
CDCA3	GGAGTTGTCATCCTGCAGGA
CDCA3	GTACCTGGATGGGAGTGCGC
CGRRF1	AAGGTCAATAGCGCTACCAA
CGRRF1	GCTATTGACCTTAGCTGATG
CGRRF1	ATAGCCTCCTTACATGCTAC
CGRRF1	CAGTGATTCATATTCCTGAT
CGRRF1	TGCACCCCCAGTAGCATGTA
CGRRF1	ATATTGATACAATATTCTGC
CGRRF1	GCCGCTTTTCTACATCGCGG
CGRRF1	GAGCAAGACCCTGATGGCTG
CGRRF1	CCACCGGCCTGGTATTGGGA
CGRRF1	GCCGGTGGTCACGATGAAGC
CGRRF1	CCGGTCATCCTCATCAGCTA
CGRRF1	GAAAACTCTTGTGCTGAACT
CGRRF1	AGCCTCCTTACATGCTACTG
CGRRF1	ACACTTACCATCCCAATACC
CGRRF1	TTCAAGGCAATCTGTTGTCA
CHD6	TGCCCTACAGAAACGACGCT
CHD6	CCTGGACAGTCTTAGATGCC
CHD6	GCCTGACGAACCCATCTCTG
CHD6	AGGCCATACCTCCGCCTGCC
CHD6	CTGGCTGTCTGTAGACTCAG
CHD6	ATGATGTTTGCATCATCTTC
CHD6	GGAGCAAGGACCAACCCCAG
CHD6	CGAGGAGGAAAACTTAGCCA
CHD6	CAAGAAAGGAAGCTTAGAGG
CHD6	ACTGCTGGTTAATACCGGGG
CHD6	GAGATGATGCAGCCACGAGG
CHD6	AATGGGATGGAGGACAGTGG
CHD6	AAGGAGCCAGGAGACCAAGA
CHD6	AAAGGAACCCAGAAAGGCCA
CHD6	CAAGGAGCCGAAGAAGGCCA
CHD6	GAAGGCACGGAAGCCCCGGG
CHFR	AATCCCGATGGAGCGGCCCG
CHFR	AGCGGGAGTGGACCATCGGG
CHFR	ATGTCATCTACTTGGTGTAC
CHFR	ATGACATCCCCAGTCTGTAA
CHFR	AAAATCAGGTCAGGTGACAC
CHFR	TTCCTTCCCCAGCAATAAAC
CHFR	GTGAAGAAGAAAATGAGAGG
CHFR	GAGGACGTCAGAGCAGCGGC
CHFR	TGGGAAGCCAGACAAGATGG
CHFR	ACAGCAGAAACACTCCCCGC
CHFR	GACATGCCCTTTACAGACTG
CHFR	GACTTCATCACTTGCCACAG
CHFR	GGATGAGGTATGCTTCCACG
CHFR	TCGGGTGCTGGGCAGTGGGG
CHFR	AGGGCGTGGCTTCCTTGCAG
CISH	CCGCCTTGTCATCAACCGTC
CISH	CAGACTCACCAGATTCCCGA
CISH	CGTACTAAGAACGTGCCTTC
CISH	TTCTAGACCTCGTCCTTTGC
CISH	GCGCTTACCCCTGAACGCAG
CISH	GGACATGGTCCTCTGCGTTC
CISH	AAAGGTGCTGGACCCAGAGG
CISH	GTCCGCTCCACAGCCAGCAA
CISH	GGCTTGGGCAGTTCCAGGGA
CISH	AGGAAGGCCCCAGCAGGCAA
CISH	TACCCTCTGCCACCTCCTCG
CISH	CCAGACAGAGAGTGAGCCAA
CISH	AGATTCCCGAAGGTAGGAGA
CISH	CAAGGGCTGCATGACTGGCT
CISH	TCCAGGGACGGGGCCCACAG
CLTC	GAATACGGTTGCTCTTGTTA
CLTC	AGTGCAATTACTTTGCTAGC
CLTC	GATCGCCATTCTAGCCTTGC
CLTC	ATGGCGCTGTCTGCTGAAAT
CLTC	TCCTTTATAGCAAAATCGTG
CLTC	TGCAGCTATATTCTGTAGAT
CLTC	GCAGTTCGGGGCCAAGCTGG
CLTC	GTACTCCAGACACTATCCGT
CLTC	GTAGGCCTGTACTTCAGCAA
CLTC	AAGAATAATCGCCCATCTGA
CLTC	TGGCTGAAGAACTCCTGCAG
CLTC	GGTATCAACCCAGCAAACAT
CLTC	AAAAGTAGGAGAGCAGGCCC
CLTC	AAAGTGTCTCAGCCCATTGA
CLTC	GAAGTTGGCACACCACCTAC
CLTC	GCCCTTTCCAAAGAAGGCAG
CNOT4	GTCTCGCAGTCCTGATGCGA
CNOT4	ATGCAAAGAGGGCACTCCAC
CNOT4	GACTTACCTCTGGGTCTGCT
CNOT4	GAGAGTGGTTTATAAACTGC
CNOT4	CCAAACTTCCCAAAATATTC
CNOT4	AATAATAGCACATCATATGC
CNOT4	TCAGCGCCTAGCAGACCCAG
CNOT4	AGAGATGTGGGCGAAAGGGA
CNOT4	GATTTTGACAAACCAGGTGG
CNOT4	ACAAAGTGACACCACTGCAG
CNOT4	GATACGCCTTCACCACCACC
CNOT4	ACTGTGATTGGATGAACTGA
CNOT4	AGAGGAGTTCTGAAGAGATG
CNOT4	TACGTATCATACCTCTGCAG
CNOT4	GGAGGAAGCCCACTTGGGAT
COPS5	CTTACCACCACTGCTACAAA
COPS5	AAGTGAATCTTGGCGCCTTT
COPS5	CCAACAAGAACAATATCCGC
COPS5	TATCATAGCCACCCTGGCTA
COPS5	CTTAATAAAATAGAAGATTT
COPS5	GGCTACAAACCTCCTGATGA
COPS5	ACAGCAGCAAGAAATCCTGG
COPS5	GTACTGCAAAATCTCAGCAT
COPS5	GTGATGCATGCCAGATCGGG
COPS5	GGGTGGTATCATAGCCACCC
COPS5	CAAATCAAAGACCTGACCAG
COPS5	GGAACTGGCCAACAACATGC
COPS5	GCCTTGAAAATGCAATCGGG
COPS5	AAAGCCAGCAGCCATAGCCA
COPS5	CCAGGAACCATTTGTAGCAG
COPS6	GCAGGAGGGCCGAAATATCG
COPS6	TGCATACCTGCTTATGGACG
COPS6	GGACATCCACGTCCATAAGC
COPS6	AGTTCATCACCTCGATATTT
COPS6	ACTCCAAGATGAGCTTGACG
COPS6	CAGCCGCGTCAAGCTCATCT
COPS6	GGGCGCGGGGAAAATGGCGG
COPS6	GCAGCTACGAACGGGACCGG
COPS6	GCATGCGCTCCCAGGAGGGG
COPS6	GACAAGGGGATGGAGAGCGA
COPS6	GAGATGTTGAGAATGACAAG
COPS6	TGAGCTGCTGTCCCACACCG
COPS6	CGAATGACAGCAACAGGCAG
COPS6	ACAGAGCATAGGCCTCCCGC
COPS6	GAGACAGTGACACAGAGCAT
COPS6	GACCGGAGGAAGCAGCGGGA
CTNNB1	GAAACAGCTCGTTGTACCGC
CTNNB1	AGAACGCATGATAGCGTGTC
CTNNB1	AATGCAGTTCGCCTTCACTA
CTNNB1	AAAATGGCAGTGCGTTTAGC
CTNNB1	AGTGAAGGCGAACTGCATTC
CTNNB1	CTCCTTCTTGATGTAATAAA
CTNNB1	GTGATGGTTCAGCCAAACGC
CTNNB1	AAGGTTATGCAAGGTCCCAG
CTNNB1	GAAGCTGAACAAGAGTCCCA
CTNNB1	GATGGAGTTGGACATGGCCA
CTNNB1	GAGTGGTAAAGGCAATCCTG
CTNNB1	GCATGTTTCAGCATCTGTGA
CTNNB1	GACAAAACTGCTAAATGACG
CTNNB1	AATGCCTCCAGACTTAAAGA
CTNNB1	CATCCAAAGAGTAGCTGCAG
CTNNB1	GCAGAAGCTATTGAAGCTGA
CUEDC2	ATCAGAGGAGAACTTCGATA
CUEDC2	ATATCGAAGTTCTCCTCTGA
CUEDC2	GACATGATGCAGAAGCTCTC
CUEDC2	AACCTGCAACCGCAGAGCTC
CUEDC2	CAGAGGATCAGAAGATTCAC
CUEDC2	CTGAGCGATGCCAGGAACAA
CUEDC2	GGTGTGTCTGGACAAAGGCA
CUEDC2	GGAGGAGCTTCTGCCAGGGG
CUEDC2	GGTGTTCCCTACCTGTTCGG
CUEDC2	GCAGATGCTGGTAGAGGGAA
CUEDC2	GAGGGGCCTGCAGCCTGGGA
CUEDC2	GACCTGCCCAGACGCCTCAG
CUEDC2	GACCCGTCTCTACCTGAGGT
CUEDC2	GGAGGCTTTCACTGAGATGA
CUEDC2	TCTCCCCAGAGCCCCTGCAG
CUEDC2	GCCTGCTCCACCGAACAGGT
CUL1	CATCCTTACCTCTGACGGCA
CUL1	TACATTTGCCTTGCCGTCAG
CUL1	GAACTCCAGCTCCTCGTGCT
CUL1	TCTGCATTCAACAATGACGC
CUL1	TCCTCCTTCTAAGTCGAAAA
CUL1	CTTTGTGGCTGCTCTTGATA
CUL1	ACAGTGGCCGAAAATTGACG
CUL1	GTATCGAGCCAGCAACTCAG
CUL1	GGACCTCGCCAAGTAACTGC
CUL1	GACTCGAGGTTTGAACCTGG
CUL1	GTTCGCCGTGAATGTGACGA
CUL1	CAGTTCCAAGAACCCAGAGG
CUL1	GGTCAGCTGCTGCACAGTGT
CUL1	GGCCAATCTGCTTCAGGCCG
CUL1	GGTCGTCCCAGATCTGGTCC
CUL1	CACCAGTCAAACCAAGCACG
CUL2	TTTGACGACAATAAAAGCCG
CUL2	AATACGTCGAAAGAGCAACA
CUL2	CACCACCATAGCCATACTGA
CUL2	TCATGTTCGGCATTTGCATA
CUL2	AGATATCTATGCTTTATGTG
CUL2	AGATATGAATGAACCACTTA
CUL2	CAAAGGAGTTAATAACCCCA
CUL2	GGGCAAACCATATGTAGCCA
CUL2	GTACTGGGAAGAATACAGCA
CUL2	GAGCAGCATTCGGATAAGGA
CUL2	GCAAAACCACATCCATGATG
CUL2	ACTGACTCCACAAATAGTGT
CUL2	GCTGGTAAACTCATAACCAC
CUL2	GGAATTGCAAACGTAGATGA
CUL2	ACCACTTATGGAAATAGGAG
CUL3	ATGTCAGTTCACGTCAAAAC
CUL3	GAGCATCTCAAACACAACGA
CUL3	TTATTTAGTCGTGTGCCAAA
CUL3	CTTACCTGGATATAGTCAAC
CUL3	GACCTAAAATCATTAACATC
CUL3	TCTGCAGACATTTCCAAAAA
CUL3	GTCGAATCTGAGCAAAGGCA
CUL3	GTGTTGGTTTACCACAGGCG
CUL3	GCACAATGTTCTAGTAGCGG
CUL3	GCCGGAAGGACACCAAGATG
CUL3	AGAGACTCACCGGAAAGGCC
CUL3	GGAAGAACCAATTGTAAAGG
CUL3	GATGGATCTGAAGTTGGTGT
CUL3	AAAGCATGTCTTGGTGCTGG
CUL3	CAAAGGCACGGGCAGCCGGA
CUL4A	CCATGTAAGTAAACGCTTAG
CUL4A	CCTCTAAGCGTTTACTTACA
CUL4A	AATTGCTTATATGCTGCCGA
CUL4A	GAAACCACTGATTGCTTGTG
CUL4A	TTCTCCACACAAGCAATCAG
CUL4A	CTCTTTCCTGCATTAACCTT
CUL4A	GAAGGATCTGTGCCTGGACG
CUL4A	GCAGGTCAGACAGCATGCCC
CUL4A	ACAGTGGTCGAAAACTTCAG
CUL4A	GCGGTTCGTCAACCTGATGA
CUL4A	ATGTTGTCAAAGCTCAAGCA
CUL4A	GGAGCTTTCGAAGGACATCA
CUL4A	GGAGCACCAGTGTCTGGAAG
CUL4A	GGTGCTCCTCATGTTCAACG
CUL4A	GTGCTGATTAAAAGTCCCAA
CUL4A	AAAGGAAAGGAAGTGGAAGA
CUL4B	ATTCAATGCTACCCTCCATT
CUL4B	CGGATGATGTCACAGTCATC
CUL4B	TTACTCACCACCGTCTTTAG
CUL4B	TTCATTGGCAGATCATGATC
CUL4B	AGCTTACCATTTGTCTGCAA
CUL4B	TAAAGAAGATTGATAGATGC
CUL4B	GAATCCCTGGGTTGTAAAGG
CUL4B	GCTGTTAGCAAAGCTAGAGA
CUL4B	GAATTCGGTTTTCATCAAGG
CUL4B	TGAGCAGCAGCAGCAGCTGA
CUL4B	GGTGCTGGTATTACCATCAG
CUL4B	TAAAGGAGGAGTGGAAGAGG
CUL4B	GCAGAAGGACGAGGTTGAAG
CUL4B	GCTGCGTTTTGAAGACACCC
CUL4B	AGTTGGTGAAGATGAGGAGG
CUL4B	GTAGATTCAAAACTTCGTGC
CUL5	CCCTCGTATTTACAACAAAA
CUL5	CCAAGATAGTGCAATGAAGC
CUL5	CCAGCTTCATTGCACTATCT
CUL5	TAACCTTTGTTCTAATCCTG
CUL5	CGTAAAAGCTTCAAAACAAT
CUL5	AATCTGTTACAAAACAGCAG
CUL5	GGAATGCTGTGTAAATGCCC
CUL5	GAGGAACATATCATTAGTGC
CUL5	GCCAATGTTGAAAGACTTGG
CUL5	CAATACAGCGAGCTGAAACG
CUL5	ACTCCTGGTTCACTGAGAAG
CUL5	GTTTGCAGCTCACTACAGAA
CUL5	ACTACGAATACTAAGAACCC
CUL5	ATAGGAAGTTGGTATGCCAG
CUL5	AGCTTGTTTACATAATCCGC
CUL5	TCACCCAAAGACTTTACAGA
CUL7	TGAACACCCCATGTCTTTCG
CUL7	AAAACGTCTTGACCTCCTGA
CUL7	GTCCCGCACATACAAAGCAT
CUL7	AACCCTCCACCAGACGCTGC
CUL7	CTGAATGCCCTCGAAAGACA
CUL7	TGGAGGGTTATGGTCCAGCT
CUL7	GCAGCTGGTGGACTTCCCCG
CUL7	GGGCAGCCTCGTCATCAGGG
CUL7	GCCCATCATGGCCCACGCGC
CUL7	ACAGTGCTAGCAGAGCACAG
CUL7	GAGGCTGGAAGATGGAACCG
CUL7	GGAGGGCTGAGCCTGGGCAG
CUL7	GGAGTGTGAACACCTGACCC
CUL7	GAGTTCCCACCACTCAGCCA
CUL7	GGATCTGGAGAACCTCCTGA
CUL9	GAGCGGCCGCCACTCGTGCT
CUL9	TGCTCATGACCAAGCACGAG
CUL9	CATCGACTCAGCCACACGCC
CUL9	ACCCCTCAGTATTCAGCATC
CUL9	CGTGAAGTAGACGAGCTGCT
CUL9	AATGGCCGAGAGTCTGCTGC
CUL9	GAAGCTAGTGAAGATGCTGG
CUL9	GGAGCTGCTGACCAACCAGG
CUL9	CCAGAGTCCGCAGCAACAGG
CUL9	GGGCGGCCTCATCATCAGGG
CUL9	AAAGAGACTAGAGGAAGAGG
CUL9	GCATTTTGCCTGCACTCCGG
CUL9	GCCACAAGAGAGAAAAGCCG
CUL9	AAGATGGACCGGGTTGGCCG
CUL9	TGTGCTGCCCACCTGCACAG
CUL9	CATAGGATTCCAGTCCCAGG
CYLD	AACAAGAATTGTAATGACCC
CYLD	CACATCAATGATATCATCCC
CYLD	AATTTCTAGGATAACCCTAT
CYLD	ACTTAGACTCAACCTTATTC
CYLD	AGAATATTCAAGAATTCCTC
CYLD	TAGAACCTTTGCTAAAAATA
CYLD	AAAGCTCCTTAAAGTACCGA
CYLD	TAAAGGCCTCCAAATAGACG
CYLD	ACTGTCCTCTCTGCTAACAG
CYLD	AGAGTGTGACGCAGGAAAGG
CYLD	GGATTACCCCATAGAAAGGA
CYLD	GAAATACCGAGTGCCTCTGA
CYLD	GCATTGGAAAGTGATTACGC
CYLD	GTGGTCAGTGAGTTCACAGG
CYLD	AGAGTGGAATCTGTTCTCGG
CYLD	GACTGGGCTGACAGAGAAAG
DCAF15	CGTGTCCCTCAAGAACATTG
DCAF15	GAGGACGTAGCGGCCGCATT
DCAF15	CTGCGCCGTCTCCGTCCACT
DCAF15	GGGCCTACCTGCCGAGTGGA
DCAF15	TGACATCTACGTCAGCACCG
DCAF15	TCTACATCTACCATCTGTAC
DCAF15	GGAGACCCAGAAGAACGGGC
DCAF15	GAAATCGGAGCGGAACAGCG
DCAF15	GCAGCTTCCGGAAGAGGCGA
DCAF15	AGGGACACGCACACCCGGGG
DCAF15	GGCGGGCTGGAAGGTGGGGA
DCAF15	CCAGCTCAAGAAGGACCAGG
DCAF15	CAACACCAGCTACTCCCTGG
DCAF15	CGAGTGGACGGAGACGGCGC
DCAF15	GCTCAGAGTGCGCACGGCAG
DCAF15	ACGAAGATCAGTCACCACGA
DCST1	CCTACTAGTACCCAAGATGC
DCST1	GCGCCACAGGAACCAGCTAC
DCST1	CGCCTTGGCTGCCATCTATG
DCST1	GCAGTGACAGGAAACTCGCC
DCST1	GACATTAAACATCATCAGAA
DCST1	GGCTGCCAGTCTCCTGTAGC
DCST1	GTGCAGAGGCTCCTGACCTG
DCST1	GGCACAGCGGATGTGAGGGG
DCST1	GCTTGCGGTCAAACCAACGA
DCST1	GTGCCGCAATCGCATCCCAG
DCST1	GGACTACGTGTACCGCCAGG
DCST1	GCTGCCACTCCGCAAAGCTG
DCST1	AGTACTGCAGGAAGGAGTGG
DCST1	GCATCCAGGCCCACAGGCTG
DCST1	TCAGGAGGGCCGCTATCCTG
DCST1	GCATCTTGGGTACTAGTAGG
DCUN1D2	TTCACCTTCGCTAAGAACCC
DCUN1D2	TCATCGCAGGTGTGACAGCA
DCUN1D2	TATTGGAAATTAGTGTTATC
DCUN1D2	TCACCTAAACCTTTCTGCCC
DCUN1D2	AAAGGCTCTTCTGCCAAGAC
DCUN1D2	CTGATAAAAATCTTTAAACT
DCUN1D2	GAGTGCACGCCATAAACTGG
DCUN1D2	GAATGAGTGGAGACTAGACG
DCUN1D2	GGAGTCCATGCGGAACGCTG
DCUN1D2	CTGCCCTGGGTTCTTAGCGA
DCUN1D2	GGACACCTGGAACCTCCTGC
DCUN1D2	ACTGCTTAACGCAGAATGAG
DCUN1D2	AAGACTGGAGCAGGAGCTGA
DCUN1D2	TAAATCGTCTCAGAAGGACA
DCUN1D2	GTTTTGGAAGAAGCTGTCCG
DCUN1D2	TGGACAAGAAGAAGCTGGAG
DDA1	ACTCACCGAGGCTTTGCACA
DDA1	GGCCACTTACTCTGTTCAGA
DDA1	GCGGGTAGGCAGGTAGACTG
DDA1	TGCGCTACCTGCATCAGCAA
DDA1	CAACCCTCCTGCAGAACCGA
DDA1	GGACTCCGTGTGCAAAGCCT
DDA1	CTGTTCAGACGGGTACTCGC
DDA1	GCGCTACCTGCATCAGCAAT
DDA1	GCCACTTACTCTGTTCAGAC
DDA1	GAAGAGAGACCAGGAGCAAG
DDA1	CGACAGCCCAGACATGCACG
DDA1	GAGCTCCGCACCTCCCCGCA
DDA1	TCGGTCCGCGCCACCTTGCG
DDA1	CGGGTAGGCAGGTAGACTGA
DDB1	GGGGCTTCGGCCCGTCAAAG
DDB1	CCTCACCGTGCTATTGATGC
DDB1	GAAAGGGGCCGTGTACTCTA
DDB1	CTCGAGACTTTAATCCCAAC
DDB1	GTGCACCTTCAAAGGTGTGT
DDB1	ATACATGCCCACCTCTTTGA
DDB1	GGAGCGGCAGCACCTCCAGG
DDB1	GGTCACGCAGCCGTTCACGG
DDB1	GCTTCGGCCCGTCAAAGAGG
DDB1	GGTAGAAGAAACCGAACTGA
DDB1	ACGAAAAGTCCTCAATACGG
DDB1	GAAGAGGCAGAGCCCAAGCA
DDB1	CATGGAAGGAAACTTTGAAG
DDB1	GGAAAAGACCAACCTCCTGG
DDB1	TAGCCGCCCCAAGATGCAGG
DDB1	AAAGGCCATCATAGAGACGC
DDB2	CCGAGATTGTATTACGCCCC
DDB2	TGTGTCTGCTAGTAGCCGAA
DDB2	ATACAATCTCGGAGGTCTTC
DDB2	CACCATGCCGCAGCATCGTC
DDB2	CTTTGCCGTCCATGTTCAGC
DDB2	ACTAGGCTGCAAGACTTTAA
DDB2	GGGGCGTAATACAATCTCGG
DDB2	GGAGGGTCCTGACGATGCTG
DDB2	AGTTGTTCCCTCCATTGAGG
DDB2	GTGGTCACAGGAGACAACGT
DDB2	GAGTTTACTCTGCTTCCCAG
DDB2	GGTGCTGGAAGTGACGGTGA
DDB2	CAAGAGGAGCAGGAGTCCCC
DDB2	GGCCAAGAAGCTCTGTGCGA
DDB2	GGAGGGCTACATCCTTGGCG
DDB2	GATGTGACTCAGACTGCCTC
DET1	ACGTGCAGCAGTGTCGCATA
DET1	ACGTGCGTGTATCACATAAG
DET1	GCAATAAAGTAGCGTCCATC
DET1	TATGCGACACTGCTGCACGT
DET1	GGCACACAGAGGCAGTACGC
DET1	GTACAATATGGTGACGACAG
DET1	GTGGTCTTGTCACACAACCA
DET1	GCGGGACAGTCAGACAGGCA
DET1	AGTGTACCTCATACCTGTGA
DET1	CAAGTATGGAGGGCACACAG
DET1	CAGGCAAGGCAGGTACCCAC
DET1	AGTTGGGGAAGACATTCTGA
DET1	GACCTACTGCAGGGATACGA
DET1	TGTCCAATGGCAATGACCAG
DET1	GTGGAACAGCTTACCGGCGC
DNAJB2	TTTCTGCAGGTATCGGCGCA
DNAJB2	AGATTTACGACCGCTATGGC
DNAJB2	AGGTCTTCCGGGAATTCTTT
DNAJB2	CTGAAGTCAGTCACAATCAA
DNAJB2	TCAGCAAACTCTTTATTATC
DNAJB2	GACCTCCTCGGGGCTGCGGA
DNAJB2	GGAGCGGGTGGAAGTGGAGG
DNAJB2	GCAGCTGGGAAGAAACCCGC
DNAJB2	GGAGGAAGAGAAGGTAAAGA
DNAJB2	GCGGCGTCCTTGGACAAAGG
DNAJB2	GACGCCGCATCACCACACGC
DNAJB2	GGAGAACGGGCAGGAGCGGG
DNAJB2	GAAATTTAAGGAGGTGGCCG
DNAJB2	ACTGAAGGAGAAAGATGAGG
DNAJB2	AAGGAGCTCTCACCTGCGTG
DNAJB2	CCAGACCTGGAAGTGACTGA
DPF1	CCCACCGATCTTGTACTCGC
DPF1	ACACGTACCCCGCCCGCTGT
DPF1	ACGCCAGGACACCGCTTCCC
DPF1	TGGATGGAGAAGACCCACCG
DPF1	GGAGACCATTATGGACTGTC
DPF1	TCCCCACAGGCATATGGCAT
DPF1	ACGGAGACTCAACATCCTGG
DPF1	GCAGCCAAGAAGGCGCCCGA
DPF1	GAAGAAGATTGAGCTGAAGG
DPF1	GTTTCCGCATGACCTCGAGG
DPF1	GAAGAACAGGGCCAAAGGAA
DPF1	CAAGAAGACGGGGTGTCCCG
DPF1	GAAGCACCCCTGAAGAAGGA
DPF1	AAGGAGGGTGGCCTCCCGGA
DPF1	TGGAGGATGACATTCCCAGG
DPF2	GACCAACAGTCGAGCGCGAA
DPF2	TACCTTTCGCGCTCGACTGT
DPF2	GAAAAGCGACACCGGGGTCC
DPF2	AAGAAGATACTCCCAAGCGT
DPF2	AAGGAAAGTCGTGGATCCTC
DPF2	TCCTTCCCATCTATTAAGCC
DPF2	TGGATGGAAAAGCGACACCG
DPF2	GTAGGAGTACAGCTGTCCGG
DPF2	ATAGATGGGAAGGAAAGTCG
DPF2	CAAGAAGACGGGACAACCCG
DPF2	GATACACACGTCATTCTCGG
DPF2	GCACGCTGCGCTCAGCACAG
DPF2	GAGGGGCTGATCTCTCAGGA
DPF2	GGGGCACCTCGCTTCTCCAG
DPF2	GCACTCACTGTCACAGGCAT
DTL	ATGCCGTCTTTGACCTGGCC
DTL	TGCACTGATAACCAGTCAGA
DTL	TGCTAGTACATGTTCCATAT
DTL	CTTACAAGTTTAAGTTCACC
DTL	CTAGCAGTTGCCAATGAAGA
DTL	GTAAAAGCTGGTGAGCTGAT
DTL	ACAGCTTGGGGCACAAGCTG
DTL	GAGAAGGTACATCCAAAAGG
DTL	GAGCTGATTGGAACATGCAA
DTL	GAAGCAGGTGGAGTGATGGG
DTL	CCAGAAGTCATCCCAAGCAG
DTL	TAGAAAAGGCAACTGACTTG
DTL	GTGTCCATCTGACTTCACAA
DTL	AGGTGATAAACTTTCCACGG
DTL	CTGAGAGGCCCAACCCACCG
DTL	GGATGGATTGCACTTTGCCC
DTX1	CAACTTCTACGACCCGTCGT
DTX1	CCATCCCTAAGTCGCAGTCG
DTX1	GGTCACAGCATCAGGCTACG
DTX1	TGCTTCGGCACAAGGGCGTG
DTX1	GGTTCGAAGATACATGCAGA
DTX1	CCCTGCAGGTAAGAATCCCG
DTX1	ATGTCACGGCCAGGCCACGG
DTX1	GCAGAACGTGGCCCGGGTGG
DTX1	TGGGAGTGGGAGAACGACGG
DTX1	CCTACGAGAAGCAGCACCCG
DTX1	TCACAGGCATCAGCCCACCG
DTX1	TGAATGAGCACAGCCGCTGG
DTX1	TCAGCACGTTCTCAATGTGG
DTX1	GTGCTGAAGGAGGACGCTCG
DTX1	AGATGAACCGCCAGACGCGC
DTX2	CTGGGGAGGTCAATAATGTA
DTX2	GTGGCGGTAGCGGCCTGACA
DTX2	AGCCAGCGTCTGTGACTATC
DTX2	TGTGGCCGTGTGGGAATGGC
DTX2	AAGACACAAACCTCATCTGG
DTX2	GCCAGAGCCAGAGCCAGAGC
DTX2	GGTGAGGTGGCCCACAGCTA
DTX2	GCAGGTGTACACCAGCCCCG
DTX2	GGCAATCGGGTCCCTAGCTG
DTX2	GCCGTGTGGGAATGGCAGGA
DTX2	GCTGAACACCACCAACGCCT
DTX2	CTCGATGAAGCTGCAGACGG
DTX2	GGGGAGGTCAATAATGTAAG
DTX2	GTGTCTCCGCACAGCCCGCA
DTX2	GGCGGTAGCGGCCTGACACG
DTX2	GGGTTTGTTGTACGGTGCAA
DTX3L	GATTTCACCTCAAGTCGATC
DTX3L	GGAGGCGAATTAACTCTCCT
DTX3L	GCTCCTCTTTGACACGTTTC
DTX3L	TATGCAGTTCGCTGTATTCC
DTX3L	GAGTCTCAGATGTCATCACT
DTX3L	TGTTGATGCATATCACCAGA
DTX3L	GGTACCAGGAAAATGGGCAC
DTX3L	CAGTATGTTCTAAAAGGAGG
DTX3L	AGAGGGTCATGAAACACCGA
DTX3L	GCAGCTTCTCCGCCACTCAA
DTX3L	TCAGAAAGGAAATCAGCCAG
DTX3L	GGAGTGCACGGTCAGCACCC
DTX3L	GTGGAGTTCAGTGAAAGGGC
DTX3L	CAGGAAGAACACCCAAACCC
DTX3L	GTACACCCGCACGAGGAGCG
DTX3L	ACCTGTTCTCCAAAGAGCAG
DTX4	TCGTACCAACCTGCAGCGAC
DTX4	TGGTACGATTCAAGGTGGCC
DTX4	CGGCTTGTGTTGGAAACCCC
DTX4	GTCCCAGTGAAGAACCTAAA
DTX4	GCAGCCCCGCTGCACTCATG
DTX4	TGACAGGACTGGACCCATTT
DTX4	GGTGAGCCACCACATCGAGG
DTX4	GATGAGTGTTAAGGCAGCCG
DTX4	GGATCCTCATGAGTGCAGCG
DTX4	TGTGTTGGAAACCCCTGGGA
DTX4	GATGCTGTAGATGATCCGGA
DTX4	AAAGGCTCACCTGAATGCCG
DTX4	GAACCAGTTCCGCCAAGACA
DTX4	CCACACCACGCCCTTCCCAG
DTX4	GACACACTGGGGACAGGAGC
DTX4	GCCGTGGTCAATGGCAGCAC
dummyguide	ACGGAGGCTAAGCGTCGCAA
dummyguide	CGCTTCCGCGGCCCGTTCAA
dummyguide	ATCGTTTCCGCTTAACGGCG
dummyguide	GTAGGCGCGCCGCTCTCTAC
dummyguide	CCATATCGGGGCGAGACATG
dummyguide	TACTAACGCCGCTCCTACAG
dummyguide	TGAGGATCATGTCGAGCGCC
dummyguide	GGGCCCGCATAGGATATCGC
dummyguide	TAGACAACCGCGGAGAATGC
dummyguide	ACGGGCGGCTATCGCTGACT
dummyguide	CGCGGAAATTTTACCGACGA
dummyguide	CTTACAATCGTCGGTCCAAT
dummyguide	GCGTGCGTCCCGGGTTACCC
dummyguide	CGGAGTAACAAGCGGACGGA
dummyguide	CGAGTGTTATACGCACCGTT
dummyguide	CGACTAACCGGAAACTTTTT
dummyguide	CAACGGGTTCTCCCGGCTAC
dummyguide	CAGGAGTCGCCGATACGCGT
dummyguide	TTCACGTCGTCTCGCGACCA
dummyguide	GTGTCGGATTCCGCCGCTTA
dummyguide	CACGAACTCACACCGCGCGA
dummyguide	CGCTAGTACGCTCCTCTATA
dummyguide	TCGCGCTTGGGTTATACGCT
dummyguide	CTATCTCGAGTGGTAATGCG
dummyguide	AATCGACTCGAACTTCGTGT
dummyguide	CCCGATGGACTATACCGAAC
dummyguide	ACGTTCGAGTACGACCAGCT
dummyguide	CGCGACGACTCAACCTAGTC
dummyguide	GGTCACCGATCGAGAGCTAG
dummyguide	CTCAACCGACCGTATGGTCA
dummyguide	CGTATTCGACTCTCAACGCG
dummyguide	CTAGCCGCCCAGATCGAGCC
dummyguide	GAATCGACCGACACTAATGT
dummyguide	ACTTCAGTTCGGCGTAGTCA
dummyguide	GTGCGATGTCGCTTCAACGT
dummyguide	CGCCTAATTTCCGGATCAAT
dummyguide	CGTGGCCGGAACCGTCATAG
dummyguide	ACCCTCCGAATCGTAACGGA
dummyguide	AAACGGTACGACAGCGTGTG
dummyguide	ACATAGTCGACGGCTCGATT
dummyguide	GATGGCGCTTCAGTCGTCGG
dummyguide	ATAATCCGGAAACGCTCGAC
dummyguide	CGCCGGGCTGACAATTAACG
dummyguide	CGTCGCCATATGCCGGTGGC
dummyguide	CGGGCCTATAACACCATCGA
dummyguide	CGCCGTTCCGAGATACTTGA
dummyguide	CGGGACGTCGCGAAAATGTA
dummyguide	TCGGCATACGGGACACACGC
dummyguide	AGCTCCATCGCCGCGATAAT
dummyguide	ATCGTATCATCAGCTAGCGC
dummyguide	TCGATCGAGGTTGCATTCGG
dummyguide	CTCGACAGTTCGTCCCGAGC
dummyguide	CGGTAGTATTAATCGCTGAC
dummyguide	TGAACGCGTGTTTCCTTGCA
dummyguide	CGACGCTAGGTAACGTAGAG
dummyguide	CATTGTTGAGCGGGCGCGCT
dummyguide	CCGCTATTGAAACCGCCCAC
dummyguide	AGACACGTCACCGGTCAAAA
dummyguide	TTTACGATCTAGCGGCGTAG
dummyguide	TTCGCACGATTGCACCTTGG
dummyguide	GGTTAGAGACTAGGCGCGCG
dummyguide	CCTCCGTGCTAACGCGGACG
dummyguide	TTATCGCGTAGTGCTGACGT
dummyguide	TACGCTTGCGTTTAGCGTCC
dummyguide	CGCGGCCCACGCGTCATCGC
dummyguide	AGCTCGCCATGTCGGTTCTC
dummyguide	AACTAGCCCGAGCAGCTTCG
dummyguide	CGCAAGGTGTCGGTAACCCT
dummyguide	CTTCGACGCCATCGTGCTCA
dummyguide	TCCTGGATACCGCGTGGTTA
dummyguide	ATAGCCGCCGCTCATTACTT
dummyguide	GTCGTCCGGGATTACAAAAT
dummyguide	TAATGCTGCACACGCCGAAT
dummyguide	TATCGCTTCCGATTAGTCCG
dummyguide	GTACCATACCGCGTACCCTT
dummyguide	TAAGATCCGCGGGTGGCAAC
dummyguide	GTAGACGTCGTGAGCTTCAC
dummyguide	TCGCGGACATAGGGCTCTAA
dummyguide	AGCGCAGATAGCGCGTATCA
dummyguide	GTTCGCTTCGTAACGAGGAA
dummyguide	GACCCCCGATAACTTTTGAC
dummyguide	ACGTCCATACTGTCGGCTAC
dummyguide	GTACCATTGCCGGCTCCCTA
dummyguide	TGGTTCCGTAGGTCGGTATA
dummyguide	TCTGGCTTGACACGACCGTT
dummyguide	CGCTAGGTCCGGTAAGTGCG
dummyguide	AGCACGTAATGTCCGTGGAT
dummyguide	AAGGCGCGCGAATGTGGCAG
dummyguide	ACTGCGGAGCGCCCAATATC
dummyguide	CGTCGAGTGCTCGAACTCCA
dummyguide	TCGCAGCGGCGTGGGATCGG
dummyguide	ATCTGTCCTAATTCGGATCG
dummyguide	TGCGGCGTAATGCTTGAAAG
dummyguide	CGAACTTAATCCCGTGGCAA
dummyguide	GCCGTGTTGCTGGATACGCC
dummyguide	TACCCTCCGGATACGGACTG
dummyguide	CCGTTGGACTATGGCGGGTC
dummyguide	GTACGGGGCGATCATCCACA
dummyguide	AAGAGTAGTAGACGCCCGGG
dummyguide	AAGAGCGAATCGATTTCGTG
dummyguide	CGGCTCGTTCTACGCACTGA
dummyguide	TCCAGCGCGAGCTTACTCGT
dummyguide	GGAGTGGTCCCGTACGCAAC
dummyguide	CAAGACCTTATCGTGCAGCG
dummyguide	ACGTCGTTTAGCACCCGGCT
dummyguide	TTTCAGGCTACGGGCGCGGG
dummyguide	CAATCGGCGACGTTTTAAAT
dummyguide	GTACCCCTATGGCCGTTCTA
dummyguide	TACCCACGCGTATTCCATCT
dummyguide	CTTGTTGCGTATACGAGACT
dummyguide	GAACGCCGCTCAAGTTGATA
dummyguide	CGCAGTACGTATAGACTTAA
dummyguide	GCGAACCCCGTAGCCAGGCT
dummyguide	CCTCGGGCGTAAATACTCAT
dummyguide	AGGGCACCCGGTTCATACGC
dummyguide	CACGGCCTAACTTGCTGATA
dummyguide	CCGGGAGATTAACGTTAATT
dummyguide	ATCTCGGGTCGACTGCGGAT
dummyguide	CGCCGGGACCGTTAGGGAAT
dummyguide	GCAAACCCGAGTGACACGTC
dummyguide	GTGCGTGAGTATTAACGCTC
dummyguide	GCTTAACCTATCCGCCAGTA
dummyguide	TGGCCACGAATTCCGCCGCC
dummyguide	GTAAGGCCCGCGTACGAGCT
dummyguide	CTCCTTACGTCGGGCATTAA
dummyguide	ATTCCTTCGGCGCTCTGCGT
dummyguide	ATGCGCTTTAATCGCCGTTC
dummyguide	TTAGCCCTCGATTGGTTGCG
dummyguide	AACGCTGTCGTACGTGTATA
dummyguide	TAACGCGCATATCTGAACAC
dummyguide	CGCTAGGTTATTTCGTGGCC
dummyguide	AATATTTGGCTCGGCTGCGC
dummyguide	CAATATCGGGTGCTACAGGA
dummyguide	CGGCCGCATCCTGTTATATT
dummyguide	CTGGATCGCCCGCAGAAATA
dummyguide	ATTAGCACGGCGACCTTCTA
dummyguide	TGGAAATCGACTGTGCGCTT
dummyguide	ATTAGCCGTTGCCATATCAA
dummyguide	ACCCGATAATAGCTACTGGT
dummyguide	ATTCAGCGCGCTCGCCCTGG
dummyguide	CCCGCCGAAGACCCTGCTTG
dummyguide	TGCCGTGAAAAGACGCTGCG
dummyguide	CTTACGCGCCTGGTCAAAAG
dummyguide	CGCATAAGTCGATAGACACA
dummyguide	GTCATCAGCGATTTGACGAG
dummyguide	CGAATCGGAACTTTGTACCG
dummyguide	AGGTCAAGCCGACCTCGAAC
dummyguide	TGCGCCTTACTCGTTAACTG
dummyguide	ATCTGAGCGTTTTCGGCCGC
dummyguide	ACGGTACATGCGCATGAGTC
dummyguide	TGACGCGATAGAGTTGGCTT
dummyguide	TTCACCGTCCACGTGCGCAT
dummyguide	TTCTTCGGCCTACACCCGGT
dummyguide	GGAATTACGACTAACCGATT
dummyguide	TGCGGGGAGCTCTCTTAATG
dummyguide	TAGAGATATCCGATCGTGGT
dummyguide	GGGTGCCCACTAATAGCCGC
dummyguide	TGCAGTCGCGCTGAGCGTCA
dummyguide	GGATTGAATGGCTAACGCGG
dummyguide	GCGGTTCCGGGAGCACATTT
dummyguide	GAAGACGTGCTGGCGTCACC
dummyguide	GGCGCATTAAAGTCGAGAGC
dummyguide	GACGTAGCCTTCCGAAATAT
dummyguide	GGTTCGAGACCTACTTAAGT
dummyguide	TGAAGTGGGGCGTCGGACAC
dummyguide	CTATATTGTCGCGCAGTGGA
dummyguide	CGGCTTTGTTGCCCGTAAGC
dummyguide	TCCCGGTTGGTGAACGATAC
dummyguide	TTAACTCGAACGCTCGAAAG
dummyguide	GGACTATCCACCGTTTACTC
dummyguide	CAGTAGCGATCGAATGTCAA
dummyguide	TAGGCGCCCGTAGCATTGGA
dummyguide	GCGGCGTCTGGGAATCGTTC
dummyguide	CAGTGTCCGAGCGATATTTT
dummyguide	TTCAATCACCTCACGGTAAG
dummyguide	CGGTTTACATCTGCCCATCG
dummyguide	GGGCGTGTATGTTCGTATTG
dummyguide	GCGGCGTCATCCACGCGTGC
dummyguide	GGGTATAGACGCGATCCTCA
dummyguide	ACAGCGCTCTCGTGTACTAT
dummyguide	ACTAGCCTGTTCGCGAGTAG
dummyguide	GACCGCGTGAGATAACGTCA
dummyguide	CGCGTGCATCTGCCGAAGGC
dummyguide	AAAACATCGACCGAAAGCGT
dummyguide	ACACCGAAGCACCTGTACGT
dummyguide	GGGTCGAGGACTAATAGATT
dummyguide	ACGCCTCCTCAAATTAGCTC
dummyguide	CCTACGCGGTAGGGAACTTT
dummyguide	AAGCACTAGTCCGTATGATG
dummyguide	AGGCGCCAACATTGACCGTA
dummyguide	TAATCATGCACATTCGGGAC
dummyguide	CGTCGGGTAGCTATTTCTTT
dummyguide	GTGCGACGAATTGTCCTGAG
dummyguide	CTTCCGTTATTCGGAAGTGA
dummyguide	TACTGGAGTTTGCGACTCGG
dummyguide	ATCCAGATCACCACGCGTCA
dummyguide	CGTTAAGACTAGCTCGGTTT
dummyguide	ATACGGCCGAAGCCCCTTCA
dummyguide	AACATCTCGTTAGGGGTATC
dummyguide	GTCAGGTAATAGTCGGACTC
dummyguide	TTCGAGGTCCGGACAGGTCG
dummyguide	TGAGCATTCGTAGCCCAGCA
dummyguide	TAAGGCGACCTGCGCTTGTG
dummyguide	AGCTGCGCGCTACTGGATCA
dummyguide	GCAAAAACCCAACGCTATTC
dummyguide	GCCGCCGATTTCATAAGTAA
dummyguide	GTTCCGTGAGGGTTACTTCA
dummyguide	CGGGGAATTGCACGGCGGAA
dummyguide	TGTCTTTAAACACGCCATCG
dummyguide	ACAAAATGCCGTGCGTCAAT
dummyguide	ACGCTCAGCACCCGCTATGC
dummyguide	CGAAACCCTCTTAAGTTAAC
dummyguide	TAAACCCTTGGCGCCCTCAC
dummyguide	CCATTCTCAACCGGTCCAAT
dummyguide	GTTATTGACCCGTCGGGAGT
dummyguide	GGTTTCACTTCGAGACCGGC
dummyguide	CTTTGATAACGTGGGCGGTA
dummyguide	CCCCAACTTTCGCGACTCCG
dummyguide	CAAACAGTCTAAGGCGACGA
dummyguide	CGGCACACCAATGCGTTCGT
dummyguide	ATCGATATACCGCCATAAAA
dummyguide	GGGACGCGAAAGAAACCAGT
dummyguide	AACGCGAGTCCGGTGGCTAG
dummyguide	TGTCATTAGCGTAACGATAT
dummyguide	AGGGCGAGCAGCAGAGTACG
dummyguide	CCGTCTCCGCATCGTCTTTT
dummyguide	CGTGCGTGAAATCGCTAGCT
dummyguide	ATCAGGCCTTGTCCGTGATT
dummyguide	CGTCCAGAAGAACGGCCCCT
dummyguide	AGAGCGTCTTCGTGACAAAC
dummyguide	GATGGCGCGCAGTTGAGTCA
dummyguide	ACGCTGACGAGTAAAAGCGG
dummyguide	TATCAATCGTCCGGGTCACT
dummyguide	TCAGATTCCGCAAGGGTCCA
dummyguide	GCGATCGGAGTGCCACGATA
dummyguide	ATATAAACTGTCGCGGTAAA
dummyguide	GTTACCTGCTACGAAAACGA
dummyguide	GAAGCGATCCGAGAGTGTAT
dummyguide	ATGACATTGCGCGTCTACGG
dummyguide	ATACCAGATGCGTCCGCTTG
dummyguide	AACGTGCTGACGATGCGGGC
dummyguide	CGGCACCTGTTAGGCTATTC
dummyguide	AGGATCGTGTACCGGGGACG
dummyguide	CGACAACGTGCAGGTGTATC
dummyguide	ACTCGAAATCACCTATGGTA
dummyguide	TCTCGTAGCCTAATGCGCCA
dummyguide	TTATGTGAGCACGCCATTAC
dummyguide	CGACGGTAATGCACCTACTA
dummyguide	ATCTGTGTGACTGCGGTCGG
dummyguide	TGGAAAGCGAGCACACCGTC
dummyguide	CAGCGCCGAAACTCTTTCCG
dummyguide	TGCCGTTAGCATGCGATCCC
dummyguide	TCGTAAACACACGACCAAGT
dummyguide	ACTACTCCGGCAAATACTCG
dummyguide	GCCCTTCAATGCGTTCCGTA
dummyguide	CAACACCCCGCGTTATGCTA
dummyguide	GCTGATATATACGACAAGCC
dummyguide	GGTATTCCGAAGTCCTCCGC
dummyguide	GGTCGCCTGTGCGACATGCT
dummyguide	CTAATCACGACCTCACCCTA
dummyguide	ATCGGTACCTCTTCACATAT
dummyguide	TTGCGTCAGCGCTGCACATC
dummyguide	CGGTGTGCCCCCAAATATTG
dummyguide	CGTGCGGTAAATACGAAATA
dummyguide	ATACGAGGCGCTTTTCTTTG
dummyguide	TGTGCACAAGTCGCAACGAA
dummyguide	CTCGGCCCACTTGCGTTATA
dummyguide	TATACTGCGGATCAATCTGA
dummyguide	AAAGCGACGTAGGCATACTT
dummyguide	ACGATCGGTAATGGTCTGTT
dummyguide	GGGCCTACGATCAGAGGTGT
dummyguide	CGCAGTCATTCGATAGGAAT
dummyguide	GGCGATTCGGGTGGAGGTCG
dummyguide	AGTTGAATGGACCTCGACTA
dummyguide	GAGTAATTTCGAACGTATTG
dummyguide	TTCCACGGTAAAATCGGTCA
dummyguide	ACTGTTGCCGCGCCAACTGC
dummyguide	CCGGCAAGAAACTATACTTG
dummyguide	TAGTGGGAATGGTCGCGTAG
dummyguide	CCGCTGTCTCACTAATCTCA
dummyguide	TGCTACCTTCGGGACCACCA
dummyguide	CTTAGCTGACCGACAAGGTG
dummyguide	CTTAAGCTTATCAACATCCG
dummyguide	ACGGAAAGACCTCGCTATTC
dummyguide	CCCTTCTGGCGGGCCAAACA
dummyguide	TCTGACGATTAATGCTTCTA
dummyguide	GCGGAATGAACACGAGGTAG
dummyguide	CAGACGGTTGGTAAGGACGC
dummyguide	GGGACTGATATATGGCGAAC
dummyguide	AGAAGACCGAGGCGCTTCAA
dummyguide	CAGGTTTGCACGCATAGCTA
dummyguide	GGCCGTCGTATTCCCCCAAG
dummyguide	CTCCCATTGATCTACGATGG
dummyguide	TTTCGTGCCGATGTAACACA
dummyguide	ATCACGTGATCGGATGGTTC
dummyguide	GCCTATCGGCATTCCCACTG
dummyguide	CAACGACGGGCCTAGTCTCA
dummyguide	ATATTTCGGCAGTTGCAGCA
dummyguide	GATATCCCGCGAAAAAATCT
dummyguide	TCACTTGTCTATACGGGGTA
dummyguide	ATGTTATTACAGACGCGTGT
dummyguide	TGGGAATTCCTCGGCCGATT
dummyguide	CGCCTCTCACGTGTAGGCTT
dummyguide	GGGCGCTAAGATATATGCCC
dummyguide	CGTCATATACACAAACGCCC
dummyguide	CGTTGGGCATAGCGAACACT
dummyguide	GCGGGGCGGTGACTTTCAAG
dummyguide	AAGGGCGTGCCCTGCGTTGT
dummyguide	GCGTTCCCCCACTGACGGGG
dummyguide	GATCCAGGAGTGATCGAGTA
dummyguide	AGCATTTGCGCGGCAACTGT
dummyguide	TTGTCCCTGAGAAAACGCGG
dummyguide	GTCCTCATCCGGTCAGGCTG
dummyguide	TATAGCTGTTTCGAAGGCGC
dummyguide	CGTGGTAGGGGTTTCCTCAA
dummyguide	CCATCACCGATCGTGAGCCT
dummyguide	TGAATCGTAACCTCGCCATT
dummyguide	AAGAAGGGCCGTACCCGAAA
dummyguide	CGTGTTTGGAATTTGCCGCG
dummyguide	CAAGTGAGCATAAGCGATGT
dummyguide	AGGACTAGTGTCGCACTCAG
dummyguide	GGCACTCCGAAAGACCTTAT
dummyguide	CCCAGGTGTATAATGAAACG
dummyguide	GACCGCAAAGTGGTCCGAAG
dummyguide	GTTGCGAGTTACTATTGGTT
dummyguide	TCTAAAGCCGTCCTGATGTT
[truncated: 9,110 more rows]
