# Supplementary material for: Negative regulation of autophagy by UBA6-BIRC6–mediated ubiquitination of LC3
Source: eLife. 2019 Nov 6;8:e50034. doi: 10.7554/eLife.50034 (PMC6863627; doi:10.7554/eLife.50034)
Supplement: Supplementary file 7. [file elife-50034-supp7.xlsx]

## Sheet: Ub
Supplementary file 7. Summary of next generation sequencing reads in the ubiquitination screen
symbol	sequence	Numbers of reads in the control population	Numbers of reads in the sorted population
AKTIP	GGCCTGTCATGGGTAAAGCC	46	366
AKTIP	AGGGGTCTTCTATTTTAGGT	70	150
AKTIP	ACATCCAGCTCACCTGAGGT	75	60
AKTIP	CTTAATGCAGAGCGATAAGA	36	52
AKTIP	CTTACTGGACAGTCACCATC	67	50
AKTIP	CCTGAGGTGGGATCAACTAG	54	48
AKTIP	CACCACTTACCTAATTGCAT	43	23
AKTIP	ACATACAGTACTGCAGCCTC	99	23
AKTIP	GGAGTAATATTCATACGGCA	22	22
AKTIP	CTGCAAGAAGAGAGTATTCC	92	18
AKTIP	GGCAGGTATTAATGTATGCA	57	13
AKTIP	TAGAAGACCCCTATGCAATT	65	11
AKTIP	CCACTTACCTAATTGCATAG	46	10
AKTIP	CGGCATGGACTTTACCAAGA	57	6
AKTIP	GGTGAAGAGAAGACATTAAC	26	3
ALG13	ACACCTGAAGTTTCATAGTC	85	1497
ALG13	CTTCTGGGGGTAGTTGTATG	107	148
ALG13	GTCGGGGATATGGGATGCCC	75	82
ALG13	AGGATGGGTAGCAGTAACAA	60	77
ALG13	GGAACGGTTTGATCTACCAG	71	58
ALG13	GAAGAATATCTTTATCGTGC	36	29
ALG13	GAGGTTACCAGAAAATGCCT	34	15
ALG13	GCAATGGACTTGGCTTGCCC	63	12
ALG13	CTCATACAACTACCCCCAGA	33	11
ALG13	GAACAATCATCAGCTGGAAC	28	11
ALG13	GGAACGGTTGGGAGATCCCA	85	8
ALG13	GCAAAGCAGCTACACAAAGA	29	6
ALG13	CAGTACTGAGTCGTTTACTC	73	4
ALG13	GATCTTGTTATTAGTCACGC	17	1
ALG13	AATGAGGTCGTCAAAGCTGG	35	1
ALG13	GCAAATTGGTAGAGGAACGG	12	1
AMFR	AGACAAGTCCGGCAAACCAG	88	1141
AMFR	AAAGATGACCAGGCTGGCCA	70	898
AMFR	GTAGCCGGTGATGGAGCAGA	118	163
AMFR	ACCGTGGCTGCTCATCGGCG	46	70
AMFR	CGCGCGGTAGGCGCTGATGA	159	47
AMFR	GCTGCGCGGAAACTGCCCTG	109	40
AMFR	ACAGGGACAGGACTCGACCG	116	27
AMFR	TCTTCGAGTGAGTGAGAGAC	82	24
AMFR	AGTCTCTTCTTGTGACAGTG	99	22
AMFR	AGCGAGGCCGTTAGCTGGTC	94	20
AMFR	GGAGGTCCTGCAGTACCAGA	50	17
AMFR	CGGCGAGCCGGACCAGCTAA	98	16
AMFR	TGTCTCTCACTCACTCGAAG	44	16
AMFR	GGAGACGCTGGACTTCGGCG	81	14
AMFR	TTAGCTGGTCCGGCTCGCCG	60	9
AMFR	AAGCGCTCGAGGAAGAGCAG	70	7
ANAPC1	GGACAACGATGATTGCAGCA	56	148
ANAPC1	TGTCCATAACAGAGTCACCC	36	77
ANAPC1	AATGAATACCTGGGTGAACC	32	67
ANAPC1	CCTGAAAGGTTGCAAATGTT	82	41
ANAPC1	TACAACAGAAGCATTAGGTG	86	25
ANAPC1	GTTGCCTGCATACATCGCAA	65	18
ANAPC1	ACAGGAACTTTTGCCCACAT	98	14
ANAPC1	TTCAAAATGTGCATTCTGTG	76	13
ANAPC1	GTGTGACTTCATTATATCAC	73	12
ANAPC1	CTGGAAAGGTGAAGTCACAG	36	12
ANAPC1	AAACAGCAATCCATATTTAG	28	6
ANAPC1	GACTTGTCTCATGAACATGA	49	6
ANAPC1	ATGGAGGAGTAATTCTGGAA	38	6
ANAPC1	TTACCTCTGATTTGACTCTC	70	4
ANAPC1	AGTTCTTGTCTGAAGGGTGA	27	3
ANAPC1	GATGAGACTCAACATTCTGG	8	0
ANAPC10	ATTTAGTGAACATCCAATTC	89	58
ANAPC10	CCAGTAGAAGAGAGCTCCAT	65	53
ANAPC10	CCCTTGGCAGCAACTTGAGT	115	11
ANAPC10	CTGACCCCAAGCAGTTGGAA	45	9
ANAPC10	GTTCTAGCCAATCACCAGAA	35	8
ANAPC10	GACATACCCGAATTTCTTGA	36	4
ANAPC10	CAGTCCTTTCCAACTGCTTG	29	4
ANAPC10	TGTATCATGAATGTACGAGT	16	1
ANAPC10	ACACCAAACAAGACACCTCC	9	1
ANAPC10	CTTGAGTTGGTGGAACCAAG	3	1
ANAPC10	AGCAAGATCTCAGTCAGAGT	9	0
ANAPC10	TGCTTGGGGTCAGCACCAGG	8	0
ANAPC10	GATGTTCACTAAATGAGGCT	26	0
ANAPC11	GCCCCATGTGCCGCCAGGAA	89	66
ANAPC11	TACTCAGATGCACGTCTCCT	142	38
ANAPC11	ACGGCGTGGCCACTTGGCTC	58	34
ANAPC11	GCTGTGCGTGCAGCCACTTG	123	31
ANAPC11	CGTGCATCTGAGTAGTGAAC	69	26
ANAPC11	CCCTCCGTAGGCAAGGTGCC	151	17
ANAPC11	TGAAGGTGAAGATTAAGTGC	29	16
ANAPC11	GCGACGACTGCCCGCTGGTG	78	14
ANAPC11	GATGCCACAGTTCTCATCGT	48	7
ANAPC11	TGCAATGCATGTGGAAGCAG	35	3
ANAPC11	GTTGGCCACCCAGAGCCAAG	34	2
ANAPC11	CGACGACTGCCCGCTGGTGT	39	1
ANAPC11	GATTAAGTGCTGGAACGGCG	25	1
ANAPC11	GAGCACTGGCCCCACACCAG	19	1
ANAPC11	GTGGCCAACGATGAGAACTG	7	0
ANAPC13	GTGCCACCATTGTCTTGTTC	138	207
ANAPC13	ATTCTCATGGAGGTACTGTA	96	61
ANAPC13	GGTATTGCGACATCCTCATA	47	28
ANAPC13	TCAGAGAGATGGAAGGATCT	50	28
ANAPC13	CATGAGAATGTTCCCCCCAT	122	27
ANAPC13	AGAAGACAAGCTGCCTTATG	74	14
ANAPC13	AGCCAAGCGTCAGTTTCCAA	50	12
ANAPC13	CCTGAACCTGAACAAGACAA	33	12
ANAPC13	GTGAGGTTCAGAGAGATGGA	41	10
ANAPC13	TGAGGATGTCGCAATACCAC	52	4
ANAPC13	CTGCAGGAAAATGGACAGTG	66	3
ANAPC2	ACAGCGTAGACCCCGAACGG	16	130
ANAPC2	GGAGCCGGTAGTACCGGCGA	73	109
ANAPC2	AGGATGGAGGACCGTTGCCG	113	102
ANAPC2	GGTAGAAGAACCTTTGCACG	91	88
ANAPC2	ATGCCCGTCGCCGGTACTAC	99	45
ANAPC2	GAGATGATCCAGCGTCTGTA	59	9
ANAPC2	GCGCGTGCTGGACCCTTCCA	44	6
ANAPC2	GGATGTTGGCATTGATGCGG	44	5
ANAPC2	TCGGTGGGTGCAGATGGCGG	15	3
ANAPC2	AGCCTATCCGCCGCTACCTG	22	1
ANAPC2	GGCTCCTCCTCAGGACATGG	11	1
ANAPC2	CGAGAAGCTGGAGGTCCCCG	15	1
ANAPC2	AGGAGCGCTCGTACTCGCCC	1	0
ANAPC2	CCAGGACCGAGTGTAGCCCG	30	0
ANAPC2	TACGCAGGTAGGGATCCAGG	1	0
ANAPC2	GCCCTCACCTCAGGTAGCGG	3	0
ANAPC4	TAAAATTGCTCGAGTCACAG	34	181
ANAPC4	CAGGTCGGAAAACGCAACAT	27	71
ANAPC4	CGACCTGTTTCCCATCCTTC	92	48
ANAPC4	GAACTCATCTTGCACTGATG	27	8
ANAPC4	CACTTCCATCCAATGCATAC	34	7
ANAPC4	GCATTTTGTGAAAAGGCGGA	34	5
ANAPC4	ACAGGTCGGAAAACGCAACA	14	2
ANAPC4	CCAGGAAAATAATCTCCTGC	11	2
ANAPC4	CTCCAGTTTCCTGTATGCAT	19	1
ANAPC4	CTAACACAGAAGGAAACCAG	12	1
ANAPC4	AAAGACACTGTAGGACGTGA	26	1
ANAPC4	TCCTGGTCTGGTCGCCCAAG	21	0
ANAPC4	CAAAGCAATGAGATCCCGCT	7	0
ANAPC4	CTGTTTCCCATCCTTCCGGG	5	0
ANAPC4	GGGAGAGAAGCAGCTCCCGC	4	0
ANAPC4	CTTGGTATCAGCAAGAGCAA	33	0
ANAPC5	GTAACCGGTACTCCTTGGAG	20	58
ANAPC5	GCTGAGCATGAACAGCCTGG	46	56
ANAPC5	GTTTCTGCGTCACATGATCT	125	49
ANAPC5	GAAGAGGAGGTATCTTGCAG	45	41
ANAPC5	AAGAACTTGATGTATCTGTA	88	31
ANAPC5	GTCCTTGATGCCGAACACAT	57	14
ANAPC5	GCGGCCATACAGCCTCCAGA	71	14
ANAPC5	GGAGCCGAAAGCAAAAGTAA	25	13
ANAPC5	GGGCAGCGCGATGGTAGGGG	27	6
ANAPC5	CCACCTCGCAGAGCTACACG	10	5
ANAPC5	GAAGACGGCAAACAAGCTGA	48	5
ANAPC5	GGAGGCAATTAGGATTGCCC	30	5
ANAPC5	TGAAAACATCTTGGACACGG	46	1
ANAPC5	GGTGACGCCGTACAAGATCG	7	0
ANAPC5	GCTCCGCGTGTAGCTCTGCG	4	0
ANAPC5	GGCAGAGCTCGCCCTGCAGG	7	0
ANAPC7	GCTGCTGAGGAGCCGCACGT	80	356
ANAPC7	GAATGTGATAGACCACGTGC	58	249
ANAPC7	GATCCAAACCGTGCCTAACT	74	117
ANAPC7	TGGGTCTTCAAGACAAACGG	70	72
ANAPC7	CTGATCAGCATGCAGAACCG	68	71
ANAPC7	GAGCCAGTCCAAGTTAGGCA	130	65
ANAPC7	AAGATGGAATTGCTTTGCTG	60	46
ANAPC7	CCTGTACAAGAAGGCTGGTC	85	34
ANAPC7	CATCCTGCTCTGCAAAGCCG	76	30
ANAPC7	TAGGGAAGACTCCAAAATGG	49	21
ANAPC7	TGCTGTGAGTAAGTATACCA	48	11
ANAPC7	GCAGATCTGTACTTCAGAGC	42	11
ANAPC7	CCTGACCAGCCTTCTTGTAC	84	8
ANAPC7	GATCCCATCAAGTATAGCAA	42	8
ANAPC7	CAAGAGCAATCAGTACCATC	37	5
ANKIB1	TTGTGCACATTCCGTTTATT	116	814
ANKIB1	GCATTATACCCACTTGGTGG	102	301
ANKIB1	GGCTCCCCATAAGATGTATT	67	217
ANKIB1	GAAGCTTTACTTCGAGCTCA	64	185
ANKIB1	GCATTTGAACACCTGATCGT	93	113
ANKIB1	GAAACAGATATTCCAGAAGG	42	39
ANKIB1	GAGGCAGCAGCATAGTGCAA	89	23
ANKIB1	GGCGTGCCAAGCGAGGATGA	78	19
ANKIB1	AAAGGAGCAAAACTTGACCA	65	18
ANKIB1	ATGCCAACTCCACCACCAAG	73	14
ANKIB1	TTACATTATGCTGCTAGACA	39	10
ANKIB1	GGTTTTCAGAGCGACTGGCA	63	9
ANKIB1	AAAGCTTCAGCAGTAAAGAG	66	8
ANKIB1	GGTATTCTCACGGGATCCCG	70	7
ANKIB1	ATGCTGAATTTCAGTATCGG	39	7
ANKIB1	TTTAGTCTACGAAGATCCTG	53	4
ARIH1	TGAGGAGGACAGCGGCGCCG	48	248
ARIH1	GCCGGGGCATGAGCAGGAGG	55	176
ARIH1	GGACGAGGAGTGCAGTGAGG	67	62
ARIH1	GGACGAAGACGACGACGAGC	42	39
ARIH1	CATGCCTTCTTCCATTATTT	96	25
ARIH1	AAAGGCAGCAAGAGATGCAC	27	20
ARIH1	CTACAACTACGAGTTCGACG	32	18
ARIH1	ATAGTTTGTGCTCAAAGCGC	24	8
ARIH1	TATTTCACTGGCCTTGAATG	13	4
ARIH1	AAAACTTATGTCCACATTCA	54	4
ARIH1	ACTATTTCGTGTCCTGCTCA	34	3
ARIH1	AAGATATCACAACCATGAGC	5	2
ARIH1	AATAACAAATAGCTTTGTAG	8	2
ARIH1	GCAGATTCTACAACACATGG	3	0
ARIH1	GATCTAGGGCAGCCCTGCAG	10	0
ARIH1	AGATCTAGAGAATGCCACAG	10	0
ARIH2	CAGACTGCCCCATGGTTATT	150	537
ARIH2	ATATCTCTGAAACTTGCCAG	56	441
ARIH2	AAGTCCTCTGGTGTACGGAG	87	366
ARIH2	TAGAGGCACAGACATACCAG	57	208
ARIH2	GCTGACAGGCCAGAGAGAGT	61	185
ARIH2	AGTGTGAGCACTAATGTAGT	72	177
ARIH2	CACACTTCGTGAGCCATTTC	119	130
ARIH2	AGTGCTGCTCCCAGCAGCTG	120	89
ARIH2	TGCACCGATTGCACTGTACT	121	74
ARIH2	AGTTCTCGTCAAGGACGGCG	96	49
ARIH2	AACAAGCAGTTGAGCAGAAT	59	23
ARIH2	TTCTGCTCAACTGCTTGTTG	97	16
ARIH2	GAAGAAGAAGAAGACGACCC	82	14
ARIH2	GAATCTTCTCGTGAATCCGC	28	12
ARIH2	GCTGGATGCTAAGATGTCAG	74	10
ARIH2	GGGGTCTGACAGCAATGAAG	29	8
ART1	GGGCCACCCCATGCTCATCG	94	214
ART1	GGTTGGCCTGGAACTCCGTG	60	139
ART1	GTGGTGGAGGTAGTGGGCCC	77	83
ART1	GCACACCTCGGAACACCTGG	57	64
ART1	ATAGACAAGAAGTGCAAGTC	65	50
ART1	CCTTACCTGAATTATCCAGA	31	41
ART1	GTGGCGGGGATGGACGGGTG	54	26
ART1	GATTCAGCTGGACATGGCCC	86	20
ART1	GCTGCTGCTCTGGTTCCTCG	71	16
ART1	GGCTCGGAGGTAGATGCGGG	78	12
ART1	GGAGTGTCTTGAAGGAGAAG	54	8
ART1	CTGGAAAGGCCCTCACCACG	82	6
ART1	GGTCTCGTCGTGTGATGGGG	68	4
ART1	TCCTTTGATGACCAGTACGC	48	3
ART1	GCATTGAACTCCTTGTGCAG	49	3
ART1	GCCCTGCAGCTCCTGGGCAG	72	3
ASB1	CTGCACACCGTTGCGAATCG	129	488
ASB1	TGTCTACCACGCCTCTCGCG	119	204
ASB1	CTCCATGATGCAGCTTACGT	92	172
ASB1	CAGTGCAGGTCGTAATCTGA	56	141
ASB1	GTAGGCTGCGCTGATGTACA	111	126
ASB1	GGTCCGCGCCAGCTTCGAGA	60	85
ASB1	GGCGGAAGCATCCATGGCGG	116	67
ASB1	TGCAAGAGGAGAGCTACCGG	69	59
ASB1	GGACATCAGGAGTCAGGTGG	56	56
ASB1	CAAGGGGCAGACCACCAAGG	101	46
ASB1	ACAGCTCCCATGGCCTGCAG	83	38
ASB1	AGTCAGGGTTCGCGCCAGCC	97	29
ASB1	GGAGCAGCCGGAAGCACTGG	72	17
ASB1	GCAGTGGCCGCGATTCGCAA	63	12
ASB1	GGTGGACGTAAAAGGACAGA	54	7
ASB1	GGGCCGGGCAGACATCCTGA	67	5
ASB10	GCAAGGCCAGACAGTGCCCC	136	290
ASB10	GGTGACTCCTGAAACTCTGC	31	269
ASB10	GTGGAGCTGCTCCTGTCCTG	93	246
ASB10	CACGTGCCCTCGGACCATCG	125	238
ASB10	CGACAGCTGCATGGCCACGG	81	200
ASB10	ATACCAGCGACCCAGAGCGA	62	154
ASB10	CCACTCTCGCTCCAAACCTG	88	152
ASB10	CCAGTCCATCACCGATGCCG	110	120
ASB10	CCTCCATCGCTCTGGGTCGC	98	117
ASB10	GCACAGCTGCAGGCAGCGGG	109	95
ASB10	GCAGCCGCAGGACTTCCGTG	104	68
ASB10	CGACCCCAACATCGCTGACC	120	60
ASB10	GCAGATCTGCTTCTAAGACG	65	50
ASB10	TGGTCGGTCCGAGGAAGAAG	112	47
ASB10	CGGCTGGCTGCCACATGCAG	76	26
ASB10	CTGGTCTCTGACATACGAAG	42	3
ASB11	GCTCGGAACTCCCCTATATG	86	95
ASB11	CCAGTGTCGACCATGGCCAG	75	83
ASB11	ACTTCATGAAGCTGCAGCTC	72	68
ASB11	AGAGTGCATGGAGATCCTGC	76	67
ASB11	GCAAGCATTGAAGAGGGGTG	111	47
ASB11	GTTCGGAGCCAAGGCCCAGT	97	43
ASB11	GCCTCGCTGCAGCATGGAGT	124	30
ASB11	TTCCGAGCTGAGGCACCTCA	73	17
ASB11	AGCGAGGCAGTCCAATGTGG	60	16
ASB11	ATGTGGCCTGCACCTACCAG	109	15
ASB11	GGCATGCCTTGGAGGTCACG	103	14
ASB11	GCTGCTGGAGTTCGGAGCCA	62	14
ASB11	AGGCCAGGTGCACCTCCAAC	109	8
ASB11	GGAGTGGGGTGTCCAGCCAC	54	7
ASB11	GAGCTGCAGCTTCATGAAGT	56	6
ASB11	TGAGCTGCAGCTTCATGAAG	74	5
ASB12	AGGCTCTGCGGACGACTAAA	82	487
ASB12	GTCTTGGGACACGAGCCAAT	86	277
ASB12	TGAAACGTTTGTAACGCTCC	130	228
ASB12	GCAGCCCGACAAGGAGGAGG	79	190
ASB12	GTAGATGCTACCACCAGGAG	84	98
ASB12	GCATTGCTGCTACAGGCCCG	85	82
ASB12	TCCACGGTCACTTCTATCAC	154	39
ASB12	GGAGGAGGACACTGACACAG	69	39
ASB12	AACGCTCCTGGCGCAAAAGC	58	21
ASB12	GGACACGAGCCAATAGGCCC	101	20
ASB12	TGACTGACAGCAGTGAAAAG	106	17
ASB12	TGACAACGACTCCTATACTT	28	13
ASB12	CTGCAGGAGCTCCTAGACCA	89	11
ASB12	GAAGCTGGTGCCTCTCCTGG	109	10
ASB12	CACCAAAATCGATTAACAGC	24	9
ASB12	GATGGAGGCAGATTTCAAGG	65	9
ASB13	TATTGACGTCGGGGCCAATC	97	351
ASB13	CTGCGTGAACCAGGTCACCG	94	242
ASB13	CACACACTCGATGCTGCCCG	146	105
ASB13	GCTGCAGGCTCTCACCCCGC	81	51
ASB13	CCGGGGCGGGATGTTTAACT	83	44
ASB13	TCTACGCCCGGGACAACCGC	64	42
ASB13	GAGGCGCAGGCATCGCAGAG	90	17
ASB13	GTACAGGGGAGGGTTGACCT	74	17
ASB13	CCAAGTTAAACATCCCGCCC	87	14
ASB13	GTGGATGCTCGCAACATCGA	71	13
ASB13	GTGCACGAGGCAGCCCAGCG	95	10
ASB13	GAGGCTTCTTATTGACGTCG	76	8
ASB13	GGGGACGCTGTGTACAGGGG	69	6
ASB13	GTAGTACTCGAAGCACTTGG	34	5
ASB13	TGGCGGCAACATCTACGCCC	81	3
ASB14	TGGGAGCAAACCACTCACAA	66	322
ASB14	ACCAAGTACCATTCCGCATT	143	194
ASB14	AAGTGGACACACTGAAATCA	97	158
ASB14	TTACTTGAAGCCGCAAGTGG	90	139
ASB14	ATGAGGAGTTCCAGGCACTG	80	93
ASB14	AACAGCACAACATGCACCTA	105	73
ASB14	CCATCCTGAGGGCTATCTGG	74	57
ASB14	TGGAGGAAATCCAGATGCTG	88	39
ASB14	AATACAAAGCTGACTTCCTG	49	35
ASB14	CTTATAGTCAGCGCTCAAAA	32	21
ASB14	GCTGCGTGACTGCTATGACA	68	20
ASB14	GCTCATAGTTGCCCATCCTG	107	17
ASB14	AACTCTGTTGAATGATGAGC	51	10
ASB14	TTCATCTATGTCTTCATCGC	61	10
ASB14	TGCACTGCAGCCTTATGCAG	78	8
ASB14	GAAGCAGCTTGACTGAAGAG	65	4
ASB15	GGTCATTTACCAATCAGAAG	29	325
ASB15	GTGCTGTTTGAGGCAGCAGG	58	318
ASB15	CTAGGCGTCGCTGCCGAGTA	120	243
ASB15	GTGGTCAGAGATACAGGAAG	68	169
ASB15	GAATTCCCAGAGTGTCTTAT	71	127
ASB15	CAGCATCCTATAAGACACTC	28	110
ASB15	TAAACGACGAGGTAATGCTG	93	106
ASB15	GCAACAAGTAGACAGTTGAG	90	77
ASB15	GGCAATGTCCACCTGAGAGA	24	65
ASB15	ACAAATACTTGAGATTGTTC	49	63
ASB15	TGCTGACCATCGCTTGACAC	84	20
ASB15	TGAACAACAGCTTCATGCAA	58	20
ASB15	AGCTTTGACTGCCAAAGTCA	107	13
ASB15	TGGGAATTCAAGACCTGTGA	76	8
ASB15	GAGCATATTGAATGACACTG	79	5
ASB15	GACTTCAGTTTAGCACACAG	31	3
ASB16	GCTGCAGGTTGCCGGAGAAG	80	675
ASB16	GGGTCGCGCTGCCTTGCATG	92	403
ASB16	GGCTGGAATGGGAGGACCGG	34	380
ASB16	GCTGCTGGAAGCAGGAGCGA	38	88
ASB16	AGCAGGAGCGACGGTGAACC	110	76
ASB16	GTAGCCTCGGGCTGTAGCGA	82	74
ASB16	CCAGCCACTCCTGCTGCAGG	74	44
ASB16	CTCGCCATCGCTACAGCCCG	128	19
ASB16	CCTGGAGCATGGCGCCGACG	95	17
ASB16	GGGTCTCGGCAGGAACGGTG	72	13
ASB16	GCGCTGAACACGGCGTGCGC	86	13
ASB16	CCCGACTAGCTGTGCGCGCT	110	11
ASB16	CACAAGGATAGGCATTAAGC	37	10
ASB16	GAGAGAGCGCAGCATGGAGG	68	6
ASB16	GGGATCGTGCAGAGGTGCAA	44	6
ASB16	GGAGACGCCCCTGCACGTGG	88	5
ASB17	GTGATGCCACTTAATGGGCT	110	308
ASB17	CTGAGGTATGTGGACTTGGA	109	307
ASB17	CACATATTTCAGTGAAGTCG	53	158
ASB17	GCCAGTGATCTGTAAATCCT	83	124
ASB17	CCCTTCGAGAGTAAGAGTAA	59	42
ASB17	GATATCACTGTTACGAACCA	72	13
ASB17	AGAAGCAATTCCACAAAGTC	70	12
ASB17	GTCTGAGCTACATAAAAGAG	65	11
ASB17	ACCAACAATATGCTCCCAGA	28	8
ASB17	GTAACCTGGCACTGATATGG	54	7
ASB17	GCTTTCTGTCATTTCAGTCA	46	7
ASB17	ACCATTACTCTTACTCTCGA	25	5
ASB17	GGTTAATAGTTGATTCCTGA	46	5
ASB18	GAAGAGATTAAAGTCTGCCC	59	75
ASB18	GTTCTTCCAGGATGCCAACG	85	55
ASB18	GAAGGCGTCGGGCCACACGG	50	55
ASB18	GCCGTGCGGCAGAGGTGCAG	145	52
ASB18	CACGCCCCTGTGCATCGCCG	146	44
ASB18	ATCTGTCCCCGCAGTCATCG	98	44
ASB18	GAGCAGGTGTCGCACGCAGG	72	42
ASB18	GTGAAATCTCCAGCCACGTT	125	30
ASB18	GTGGACGCGAGGAACGGCCG	83	27
ASB18	GGGCGCGCTCGACTATGGCG	63	27
ASB18	ATAGTCGAGCGCGCCCGCGT	125	22
ASB18	GTTACCTAGCAGCATGCCGG	105	22
ASB18	GGACACGCCGCTGCACGTGG	89	18
ASB18	TGAGGGGCTTCAGATGGTCG	114	17
ASB18	GACGCGGGCGCGCTCGACTA	107	9
ASB18	GTGCAGGCGCTGCTCAACCA	100	5
ASB2	GCAAGGGGCTGATGACGTCG	107	841
ASB2	CAAGAATGAGCATGAGGAGG	77	654
ASB2	CTCCGCGTTCTTGCGCTCGC	76	613
ASB2	CCGTTTACTTGGCAACGTGC	55	288
ASB2	CGAACTCTCAGGAGGTGCAG	92	91
ASB2	GCCTGCGGACCCCTTGATAA	91	71
ASB2	CGACCAGCGCACCCTGCAGG	126	61
ASB2	ATGCAGATCCTGGTGAGCGG	83	27
ASB2	AGCCTGCGAGCGCAAGAACG	130	22
ASB2	AAGCCCATTGGGGCCCGGGC	106	22
ASB2	GGCCGAGCGCAACCACGACG	79	21
ASB2	GCATTGTGCGCAGGCAGCCG	137	21
ASB2	GACCACCGCGAAGTACAGCG	75	20
ASB2	CGAGAGACACCGCTCTACAA	59	18
ASB2	AGGTGCTGACATCAACACGC	27	1
ASB2	GATGGTGGCGGGGAAGGCGG	17	0
ASB3	AAGATCAGGATCTGCCCCAC	65	948
ASB3	TGGCTACAGCCCAGACGCCC	85	365
ASB3	TTGCATCTCGCTGCAAGTCA	65	234
ASB3	AAGGAATGCCAGGATGACTT	86	216
ASB3	TTATTTGTGGCTGCTCAGTA	69	70
ASB3	CTTGTTCATTGCTGCTCAAG	110	38
ASB3	GTGGAGCTTTTGCTCTCCAG	124	37
ASB3	GTTCCATCCACACATAGAAT	45	28
ASB3	TTAAGGCTGTTGCTTCAACA	67	23
ASB3	AAGGTTGCTCATTGGGACCA	108	18
ASB3	AGAGGGACACACAAAATGTG	79	16
ASB3	AATGGATCCCATTCTATGTG	79	15
ASB3	GAATTGCACAGTAGAATCAG	99	11
ASB3	TCCTCATTACAGTAAAGATC	29	10
ASB3	AATCCAGCAACCAGAAGATG	58	9
ASB3	AGGTTACCTGAAAAGAAGCC	49	9
ASB4	GTTAAGATCCTCTGTGATCG	133	322
ASB4	GATCCAAAGGCAAATAGATG	57	263
ASB4	AAAGCGGAGGGCCCAGTAGG	103	253
ASB4	AGCTATCCCCGATGATGACT	92	165
ASB4	AGATTTAGTGACAGGGGCAG	81	77
ASB4	GCAGCATGCGGCAGACCAGG	66	71
ASB4	GGCATTCACGCTGTCCACTA	88	64
ASB4	GCATCATGTGCATGAGCACG	86	61
ASB4	CAAACAAGACAGAGAGATGG	59	61
ASB4	GGAGCTGGTGGCCTTCTACG	78	39
ASB4	GAAGACCAACAACCAAGATG	68	31
ASB4	ACTCCTGCTCCTTAAAGCGG	135	18
ASB4	ATTTACCTCCAAGTCATCAT	18	8
ASB4	GCTTTGCCCCACGATCACAG	18	6
ASB5	CATCTATGCCCCAGGATATC	85	1942
ASB5	AAAGAAGCTTCCAGATGCAA	21	348
ASB5	GTATGGTGCCAAAGCCCAGC	84	92
ASB5	GTAGGTGCTGACGTACAGAA	67	50
ASB5	TATGGAGTAACCCAAGGACA	61	42
ASB5	TGACTTGCTGCTTCATGTAG	73	39
ASB5	CTTCGTGCAATGGGGTGACA	82	28
ASB5	GAAAGGCAACCGCAAGGAAG	87	28
ASB5	AGAAATGACTGAGGATGGCA	67	26
ASB5	GCGGCCTCATGCGTTGGGGA	110	26
ASB5	TAGTGGTGATCGATCTGCCC	73	22
ASB5	CTACATGAAGCAGCAAGTCA	41	12
ASB5	GACATACAAGCTACATAGAG	39	11
ASB5	CCATTGCACGAAGCCTGCCT	59	7
ASB6	GAATCGCATCCACCAGCGGC	72	112
ASB6	GATCCACGAGAGTAGCCCCT	90	99
ASB6	GGAGCTGCTGGTGCATCACG	70	50
ASB6	GAGCAACGCCCTGCTCAAGA	87	31
ASB6	TGAGCTGGGGCTGACGCGGG	93	19
ASB6	ATCACGGGGCCGACGTTAAT	90	18
ASB6	GCCCAGTTATGTCGCCAGCG	82	14
ASB6	CCGACGTTCTCTTGCGGCAT	92	13
ASB6	CGTTCCTGCACGGCTTCCGG	82	13
ASB6	GTCAATGCCGCTGACAAGCA	77	12
ASB6	CCAGAGACTCCTGCCGCTCG	89	12
ASB6	CCGGTCCCTCCGATTAACGT	58	10
ASB6	CATGCTCTGGCCAGCAGCGA	45	10
ASB6	GGTACTCGAAGATGATCCTC	61	10
ASB6	ACGGGGCCGACGTTAATCGG	82	6
ASB6	GCGGAACCAGCCGGACATGG	83	4
ASB7	GAGTCCAGCCATTCGCATCT	147	329
ASB7	AGAGGGGCAGACACAAACTT	70	322
ASB7	GACATCCCCAGCAGCCACCG	137	304
ASB7	TGATGAACTACCAATTGCCA	64	245
ASB7	CGGCTGGACTCCCCTCCATG	111	213
ASB7	ACGGAGCAGACACGAACACA	144	208
ASB7	GTAGTTCATCAAGTAGCTTT	95	134
ASB7	CCGAATGGCCGAGATGCGAA	62	122
ASB7	CTAACATCAAGCGTGCAATG	61	105
ASB7	GTGCGAAAGATGCTAGAACA	55	98
ASB7	TGTTGGCATTGTGGTCCAGG	85	55
ASB7	AGAGTTGCAGATTCAGGCCG	46	47
ASB7	AGCTCGCCATTATCCGAGAG	101	36
ASB7	GTGGTACCTTTATCACTGAG	94	20
ASB7	TGTTACACCATCATTGTCGA	51	18
ASB7	TGTGGCTGCCCACTACGGCA	106	7
ASB8	GTCAGCATCTGACACCATAC	126	523
ASB8	GCACACTCACCCCTCTGATG	66	231
ASB8	CCTTGATGAGTTCCAGTATG	99	139
ASB8	ATCATGTGGGAAGGAACGGA	65	81
ASB8	AATTGTTCGGATTAAGCGCT	80	70
ASB8	CCGGCTATTCTAAAAGTAAC	22	64
ASB8	GACACCCATCTCCCGCCTGG	88	58
ASB8	GTGCGGGCTCTCCTAGAGAG	55	47
ASB8	GCAGATGTGAACTGCACTCA	114	28
ASB8	GTAATCCAGGGCATTGACAG	72	19
ASB8	GGTGTCAGATGCTGACTGTG	80	17
ASB8	AATGTAGAGGACCTCATCAG	63	14
ASB8	CTATGCCGTGCGCCGTAGCC	56	10
ASB8	ACCATACAGGCACAGTGCAA	45	9
ASB8	CTTCCCACATGATAATGTAG	19	4
ASB9	AAAAAGCTACCTGGCTGATG	49	373
ASB9	AATAGAGTGGAGTGCCCAGG	93	101
ASB9	CAAGACAGGCTTCATGGAGT	90	76
ASB9	AGAGAGATGACCTCCAAGAC	93	75
ASB9	GTGGGCTGTGAACATCATCA	117	67
ASB9	TTAGGAGCGGACGTGAACCA	97	52
ASB9	CAAGGGACTTTCCTGGCATC	86	27
ASB9	TATGACTCACCGCCCATCAA	54	21
ASB9	TGAATGGTGTGACAGCAGAC	68	20
ASB9	GGATTTTGGAGCGGACACCC	50	20
ASB9	GGGAATCCTGACCTTTCCCT	73	18
ASB9	CATGGATGGGAGCAAGCCCG	77	8
ASB9	GGTGCCTCCAGAGAGCCCCT	41	7
ASB9	ATGCATGAAGCTGCAATCCA	97	7
ASB9	CTGACACAAGCATTAAACAG	35	2
ASPSCR1	CAATGGGGAAGGGGACCCGG	70	1539
ASPSCR1	CCGGACGGCTCAAGTCGCCG	98	535
ASPSCR1	GGCACGACGCTGCAGTCGCT	146	325
ASPSCR1	GAGTGCCTGCAGCACCCCGG	88	138
ASPSCR1	GCACGACCCACCATGTTCTC	138	97
ASPSCR1	GAAGCTGGAGCGCTACCCAA	80	91
ASPSCR1	GGTGTGCCACCCCGACCTGG	73	37
ASPSCR1	GCACTGCCCTTACCTGATGG	150	36
ASPSCR1	GAATCTGGGGAGCTCAGCCG	72	29
ASPSCR1	ACTGCAGCGTCGTGCCCCGC	95	27
ASPSCR1	GCCCGCTTCCCGGAGCCGTG	79	27
ASPSCR1	AAAATGGCGGCCCCGGCAGG	86	21
ASPSCR1	GCAGTCGCTGGGCCTGACCG	104	19
ASPSCR1	GGTGACCAAGGCCTTCAGGG	45	18
ASPSCR1	TCACTTCAGATCATATTCAC	30	6
ASPSCR1	AGGTTCTGGAGGACACGTGC	43	5
ATE1	CGCAACAGCATCATCCATTG	115	110
ATE1	TTCCGTCAAGCCAGTACTGC	64	98
ATE1	TGACGGAAAGATCATTGCTG	87	94
ATE1	GGCACATTCCATGACAGTAC	34	87
ATE1	CGGCTCGCTCACCATTGGAG	80	72
ATE1	CGTTCTTGCAGTAGCCGCAG	94	36
ATE1	GAGTCGGGCAGCCGCTCCAA	113	36
ATE1	TCATAGACCGAGGATGGCGA	91	26
ATE1	TATCAGGATCTCATAGACCG	69	16
ATE1	GAACCCAGCTGGAGAACTTG	28	14
ATE1	CTTCAGTCACAAGATTTCGT	34	9
ATE1	GAAATTTCTAGCTAAAGGGG	43	9
ATE1	GCCTTCAAAATCTCACAAGA	18	6
ATE1	GTTCCCAAAGGAAGTTGTGA	52	3
ATE1	GTAGGAGAGAAGTTGGGCTC	64	2
ATG7	GCCCAAGGCTCTGGCAGCAG	129	62530
ATG7	GGAGCAAGCCCGCAGAGATG	107	60576
ATG7	TGGGAAAAGAACCAGAAAGG	56	50528
ATG7	TAGGGTCCATACATTCACTG	72	43295
ATG7	AGAAGAAGCTGAACGAGTAT	73	34793
ATG7	GGTCAGCAGATGCCACAGGG	79	33905
ATG7	TCCGTGACCGTACCATGCAG	82	26278
ATG7	AGCAACAACATACCACACCG	30	24232
ATG7	ATAGCTGGGCAGCAACGGGC	48	23501
ATG7	GGTGAACCTCAGTGAATGTA	63	20338
ATG7	GCTGCCAGCTCGCTTAACAT	67	19790
ATG7	CTTGAAAGACTCGAGTGTGT	95	19750
ATG7	GCCCGTTGCTGCCCAGCTAT	110	16726
ATG7	GAAGCTGAACGAGTATCGGC	44	15190
ATG7	GTATGATGAGAACATGGTGC	78	13881
ATG7	GATACTCGTTCAGCTTCTTC	93	253
ATRX	ATGATTTAAAGACTCAGGCG	47	211
ATRX	AATGCTAGCAATCCTCAAAG	32	188
ATRX	TCGTGACGATCCTGAAGACT	78	143
ATRX	GATGGAAAACAGCAAGGAAG	62	109
ATRX	AGGGTGTAGTCTTTACACGT	91	109
ATRX	TCAGAAAAATCCAAGTCTTC	34	95
ATRX	TGATTCATTGCAAGTCGTGG	91	56
ATRX	ACTATGCAGAGCTTGCCAAA	55	46
ATRX	GTGAATCCGAAGATGAACAG	58	36
ATRX	GGTGTGGGCAATAATAGTGA	38	31
ATRX	ATTCTTCTGATGAGTGTGCA	95	24
ATRX	TAATTCTGAGGAAGAAGAGG	47	16
ATRX	GCAGTGACCAAGTCCAACAA	86	12
ATRX	TCAGTTGATCATCAAGGGGA	81	11
ATRX	CTTGCAATGAATCAAAACAC	10	4
ATRX	ACATACTTTGTTACAATTGA	41	3
ATXN3	ATCCTCAATTGCACATCAGC	37	503
ATXN3	CTGGTGGCTGGCCTTTCACA	102	212
ATXN3	CGAGTGTTAGAAGCAAATGA	87	158
ATXN3	AGAGTTCACATCCATGTGAA	52	150
ATXN3	AAGATGAGGAGGATTTGCAG	53	112
ATXN3	ATGAGGAAGCAGATCTCCGC	67	102
ATXN3	ATCCTGAGCCTCTGATACTC	108	47
ATXN3	ACAGCAGCCTTCTGGAAATA	78	28
ATXN3	CTGTCATCCATATTTCCAGA	29	22
ATXN3	CAAGATATGACACAGACATC	73	22
ATXN3	CCCAAGTGCTCCTGAACTGG	91	15
ATXN3	TCAACAGTCCAGAGTATCAG	54	14
ATXN3	TAGAGTCCATAAAACAGACC	48	14
ATXN3	TACTTAGCTGAATAGCCCTG	49	11
ATXN3	TGCCTGAATAACTTATTGCA	46	3
ATXN3	AATGTTAGACGAAGATGAGG	63	2
AUP1	AACCTGCGAAGGACGCTGTC	80	98
AUP1	GGAGTCCGGAGTCCTCCTGC	89	86
AUP1	GCTTCATGGAGATGAATGGG	54	79
AUP1	GAGGCCACCAATGGCCGGGA	85	27
AUP1	AGAGATTCTGTGCTTCCACG	71	26
AUP1	GAGACCAGCACACAAAGCTG	64	18
AUP1	ACACTCACCACAGAGACCAG	62	18
AUP1	CTGCTGCTCTACGCGCCAGT	79	12
AUP1	CCTGGGTCTCAGAACTGCTG	62	11
AUP1	GAAAGAGGCGCAGGACGAGG	32	9
AUP1	GCCCGCGTCGGAACCTGCGA	46	9
AUP1	GAGCCCTAGCACCGCACACA	133	7
AUP1	GCTAAACCCACCTGAAGCGC	41	4
AUP1	GTGTCCCCAGATTCGTAGTG	80	3
AUP1	GGAGGGAGGGAAAGAAGACT	40	1
BAP1	GAAGCTCAAAGAGTCCCAGA	47	159
BAP1	TGAAGTCCTTCATGCGACTC	87	98
BAP1	CCAGGGGTCCAGCAGCCCAG	74	66
BAP1	ACCCACCCTGAGTCGCATGA	108	38
BAP1	CGACCTTCAGAGCAAATGTC	74	22
BAP1	GAGCGGATAGGCGAGCGCAG	87	15
BAP1	TGACTATGAGGATGACGAGG	101	14
BAP1	CCAAGGTAGAGACCTTTCGC	59	11
BAP1	GAACCGTCAGACAGTACTAG	64	10
BAP1	AGTGGACAGACAAGGCCCGG	75	9
BAP1	GGCGGACTGGAACTCGGCTG	63	9
BAP1	TGAGGCGTGCCTCAAGGAGG	50	8
BAP1	TCAAATGGATCGAAGAGCGC	34	4
BAP1	TACCGAAATCTTCCACGAGC	35	3
BAP1	ACAGGGCTGGAGGGCCGCGT	58	2
BAP1	GAAGGGAACAGGGAAGCCAG	13	0
BARD1	GCGGGACGATGCCGGATAAT	110	999
BARD1	AAGTTGGTGGTACATCAGGG	76	237
BARD1	GGGCAACAGCTTCATTGCTG	83	198
BARD1	AACACTGGGCAGCGTAGGGA	78	186
BARD1	GCGCCCGCCATGGAACCGGA	60	25
BARD1	CAAGTCTTGTATCCAGGCCG	67	19
BARD1	TGAGTCATTTTGATACCCGG	54	12
BARD1	CTACATGACAATGAGCTGTC	48	7
BARD1	ATGTCCAGTGTGTTACACCC	39	4
BARD1	GGTCGAGCGCGGCGCGACTG	35	3
BARD1	AGAGGAATCTAAGCAAAAGC	24	2
BARD1	AGTCTCCAGACACTAAGAGC	23	2
BARD1	GATGTGAGCACATCTTCTGT	39	1
BARD1	TGAGGACTGGAGATAACAGA	43	1
BARD1	TCACATCCTCCTAAACACAC	8	0
BAZ1A	TTTCATGTAAGCGCGAACGA	49	417
BAZ1A	CAACACTGTGAACCACAAGA	24	171
BAZ1A	TGTGCTGTGACGGGTAGACC	58	134
BAZ1A	GATGTGGAAGACAGTATGGG	71	105
BAZ1A	AGGAGTTCTGGCCGACAGGG	60	95
BAZ1A	TGTGAGACAGAAGCCGCCCG	85	50
BAZ1A	CTCCCTCTTCGTCTGTTAGC	57	35
BAZ1A	GACCCAGGATCACATAAAAG	53	34
BAZ1A	GAATGAAGACGTAGAAGAGA	52	27
BAZ1A	GGACTGAAGATAAATGTGGG	35	27
BAZ1A	CAGAACAACATCGAAAAGAG	42	13
BAZ1A	CACTTTATACTTGAATAGTA	20	10
BAZ1A	TTGACTAATATGTATTCGTT	65	6
BAZ1A	TTGTTAAAGCAACACAAATC	26	6
BAZ1A	GCATCACCAAAGATTTCAGG	20	4
BAZ1A	AGTCCTCGTAGAAAACGCAG	16	2
BAZ1B	CAGAGAGTATGAAGCCCGCT	70	403
BAZ1B	GCCTTGAGTGCAGATAAGGG	76	189
BAZ1B	CTTCCTACTTCATTAAAAAA	20	79
BAZ1B	GGAGTTGCGCCTGGCAGTAG	93	64
BAZ1B	AGTATGTCATGAGGATCCGG	45	36
BAZ1B	TGAGAGTGATGAAGAGGAGG	40	36
BAZ1B	GAGACAACCACACCCAAACA	80	24
BAZ1B	GGCCTCCTGAGTGTGCGGGA	66	20
BAZ1B	AAAGGTACAGTGAGCGCATT	84	16
BAZ1B	GATTGTGAAGATTCATCCTT	67	15
BAZ1B	AGTTTCACATCATATTTGTG	101	15
BAZ1B	GGAGGAAGAAGATTATGAGG	42	14
BAZ1B	GGGAGATTTGGAATTCCCTG	81	9
BAZ1B	GAACTCCAGTCAGATTGCTC	57	7
BAZ1B	GATGTTCAGGAGGAAAGCGA	25	5
BAZ1B	GAAAATGGTAGAGGAAGCAA	37	3
BIRC2	CAAAGTAAAATCCTGACAAC	23	104
BIRC2	CTGAGACAGGCACCCCGGCG	29	59
BIRC2	ACCTGTGGTTAAATCTGCCT	44	37
BIRC2	CATGGGTAGAACATGCCAAG	53	24
BIRC2	GTAGCCTGCTTTGCCTGTGG	53	12
BIRC2	GGCTTGAGGTGTTGGGAATC	59	8
BIRC2	GAGTTCTTGATACGAATGAA	35	6
BIRC2	AAGAGGGTTTGGAGAAAGGC	23	5
BIRC2	TGGAGACGTATTCTTAGAGG	27	4
BIRC2	ATATCCTCATCTTCTTGAAC	29	2
BIRC2	CAAGCTACTATGTTCCAAGG	17	2
BIRC2	AATGGGCTTTAATAGAGACC	25	2
BIRC2	TGTCATGATGAATACACCTG	34	1
BIRC2	ATGCTATGTCAGAACACCGG	18	1
BIRC2	CCAGCTCTTGCCAATTCTGA	21	1
BIRC2	ACATATTCAACTTTCCCCGC	20	0
BIRC3	GACTTGTGTAATTCCAATCC	86	536
BIRC3	ATGCTGGATAACTGGAAAAG	30	216
BIRC3	CTATCCACATCAGACAGCCC	83	133
BIRC3	AGAGTGGCTTGCTTTGCCTG	73	92
BIRC3	CCTACCTGTTCAAGTAGATG	62	35
BIRC3	AAAGTGCCATTCTATTCTTC	85	34
BIRC3	GAAAACAGTGGATATTTCCG	66	16
BIRC3	GTTAGTAGACTATCCAGGAT	48	10
BIRC3	GAGAGTTTGAATAAGAGCCA	59	9
BIRC3	ATTGAGCAATTGGGAACCGA	29	9
BIRC3	GTTGGCGACAGAAAAGTCAA	56	9
BIRC3	AGGAACCCCAGCAGGAAAAG	48	8
BIRC3	CTTCCGGGTACAGAAAACAG	61	8
BIRC3	CTGGATAGTCTACTAACTGC	37	4
BIRC3	TTACCCTCATCTACTTGAAC	20	3
BIRC3	CAGAGAGTTTCTGAATACAG	20	3
BIRC6	GGATGGCGTTGAGCGCAGGG	66	6227
BIRC6	ACTCACCAAGGTTCATCAGT	48	3017
BIRC6	GGACAGGCTAACACCAATGG	44	2203
BIRC6	CAAGGAGACCAACTTTGGCG	45	1959
BIRC6	GCCCACCTATAGCCTACATG	56	1891
BIRC6	GAGCAGAGGAATGTTAGTGG	68	1738
BIRC6	TGTATAGTGAAGCTAACAGA	19	1665
BIRC6	AGACTCACCACTGAGCGCGG	35	1561
BIRC6	GAAGTAAATCACAGCCCCGG	85	1346
BIRC6	GAGGCTGCCAAAGTTTGCAG	20	1301
BIRC6	GAGTGGCTGGTGCTGCGGGA	41	883
BIRC6	GGGACCATCAAAGTCATCGA	12	861
BIRC6	AGTGTGATTGTGCTGAGCGC	63	44
BIRC6	GTAGTGTATGCCTCGTTTGT	137	29
BIRC6	CTTATCAGCATGTTTAGAAA	26	14
BIRC6	TTCTTACCTTAGCAACTTTG	52	7
BIRC7	CCGGTACCTGGGGAACCACT	103	174
BIRC7	GCAGCAGCCAGCAGCTCGGG	95	169
BIRC7	CCTGGACGGAGCATGCCAAG	72	116
BIRC7	GACCATCACCGGCTGCCCAG	91	87
BIRC7	GGCCTGCAGAGCTGGAAGCG	56	56
BIRC7	GCGTCTTCCGGTTCTTCCCA	101	48
BIRC7	AGTGCCAAGTGCCTGCACCG	112	43
BIRC7	AGACTTTGTCCACAGTGTGC	85	37
BIRC7	CTCTCACCGGAGGGGGCCAC	128	30
BIRC7	GGGCAGCTCAGGGTACCCAG	82	26
BIRC7	GCTGCGGCCCCTGACAGAGG	94	9
BIRC7	GGAAGAGGAGGAGGGCGCCG	41	8
BIRC7	GGTCCAGTCTGAAAGTGCCC	56	7
BIRC7	GGTCCCACGCAGGAGCGCTG	76	5
BIRC7	ACTCCTCAGAGCCCATGCCG	45	5
BIRC7	GGACAGGGCTGCCCAGAGAG	51	2
BMI1	CTAATTTGTATACAATATCT	27	203
BMI1	GCATCACAGTCATTGCTGCT	102	86
BMI1	ACAAAGCACACACATCAGGT	67	69
BMI1	TACTCACTTTTGAAAAGCCC	37	67
BMI1	TATGCTACTTACCCTTCTCC	49	58
BMI1	ATTGTATACAAATTAGTTCC	91	32
BMI1	TCCTACCTTATATTCAGTAG	66	20
BMI1	AACGTGTATTGTTCGTTACC	133	19
BMI1	AAAGGTTTACCATCAGCAGA	51	13
BMI1	GGAACCAGCAACAGCCCCAG	67	13
BMI1	GCAGCTCATCCTTCTGCTGA	101	11
BMI1	GATTGATGTCATGTATGAGG	48	10
BMI1	CTCTAATGAAGATAGAGGAG	47	10
BMI1	CAAAGAGAAATCTAAGGAGG	43	9
BNIP3L	GTTCTGTGTCTTTAAGCATG	99	138
BNIP3L	CCCGACACACCTGAGAGCTA	119	84
BNIP3L	CTACCCATGAACAGCAGCAA	30	72
BNIP3L	TTGTTGTGCAGGGGCGGCGG	93	49
BNIP3L	TCACTGTTGAGGCCGGCCGG	111	25
BNIP3L	AGAAGGAGAGAAGGAAGTCG	63	17
BNIP3L	AAAGTGGAGCCATGAAGAAA	44	17
BNIP3L	CAACAACAACAACAACTGCG	49	17
BNIP3L	AGCCCTTCGCCACAAGAAGA	55	16
BNIP3L	TTGTGGATGGAGGATGAGGA	81	13
BNIP3L	GAACACCTTCAGAAATTCTG	19	10
BNIP3L	TCAGGACAGAGTAGTTCCAG	111	9
BNIP3L	CGAGGCTTTGAAGAAAAGTG	67	8
BNIP3L	CTTAAAGACACAGAACGTTT	35	6
BRAP	GGGCGCCAGCCTCCCAGTGA	99	261
BRAP	TCGCCTGTCCCCGCCGGCTT	103	167
BRAP	TGTTATCCGATTGGAGCTCG	101	50
BRAP	GAACACTCGCCTGTCCCCGC	90	42
BRAP	GAGACCATGAAGTCCAACCC	109	39
BRAP	CAGTCAGGTCCATCACTGGG	94	35
BRAP	GGCGCTGAAGCCGAAGCCGG	85	27
BRAP	ACAACCAGTGACACACTCAT	55	22
BRAP	ATAATCGCTACTTTCTCTCC	53	19
BRAP	AGATTCGCTGAGATTCCAGC	51	18
BRAP	AGCCGGGGAAATGTCTGATG	68	13
BRAP	AGCTGTTTGGACGGAGAATC	92	12
BRAP	CAAGATAGTTCGGATAGAGA	50	11
BRAP	GACACTGGCTGTGGAAGCTG	83	10
BRAP	GATAGAGAAGGACACAGCAG	58	10
BRAP	CGAGTCTGGGACTATGCTGG	56	4
BRCA1	GGTTTCTGTAGCCCATACTT	80	302
BRCA1	TCTGGGGCTCTGTCTTCAGA	68	248
BRCA1	AAAGCGAGCAAGAGAATCCC	32	223
BRCA1	AAATCTTAGAGTGTCCCATC	88	46
BRCA1	GATAAAGCTCCAGCAGGAAA	39	30
BRCA1	TGAACCCGAAAATCCTTCCT	67	12
BRCA1	AAACTTACTTGCAAAATATG	29	12
BRCA1	TTGGGGAACTTTCAATGCAG	42	8
BRCA1	GAACTCTGAGGACAAAGCAG	39	5
BRCA1	GAAGCTGTGTTAGAACAGCA	50	5
BRCA1	GATGCCTGGACAGAGGACAA	21	4
BRCA1	TGCTAGTCTGGAGTTGATCA	38	3
BRCA1	AGTTTCTATCATCCAAAGTA	33	3
BRCA1	GGTCAGGCCAGACACCACCA	39	3
BRCA1	GTCAATGGAAGAAACCACCA	30	1
BRCA1	GCTGCACAACCACAATTGGG	19	0
BRCC3	ACAAGCCATGTACCAGATGA	106	369
BRCC3	TCTAGTTGAACGATGATACA	77	219
BRCC3	GAGCGTGGTTGAGACAAACG	82	168
BRCC3	GGCCAAGATGGCGGTGCAGG	97	108
BRCC3	ACTGTTTGGCCTTCACATGT	87	84
BRCC3	CCTTCTCTGTGCTCAGAGCG	125	81
BRCC3	CAGAGAAGGAGGAAGTAATG	66	56
BRCC3	GCTCTGGAGAAATTTCTACT	76	40
BRCC3	CAAAGCCTTGATCCATCATC	105	29
BRCC3	AGGAGCAGGATGCGTATAGG	82	26
BRCC3	GAAGCTGCAGACAGCTGCTC	128	24
BRCC3	CACTTGCTTCCAATCCATAC	19	18
BRCC3	GTTCTTATCTTCTATGAAAC	34	14
BRCC3	ATACTTACTCTGAACTCTTT	34	8
BRCC3	GGTGGTGCAGGCGGTGCAGG	74	8
BRCC3	AATGGGGCTGTGCATAGGGG	61	5
BRE	ATTCGGTTCAAGGCCACTTC	135	451
BRE	GCCAGACCCCTCAGCTTTGC	77	355
BRE	GAGGTGACAAGTACAGCTTG	71	264
BRE	GATATGAAAGGGGAGAGCAT	64	165
BRE	GGAGGGCCACATCTTCTCCA	75	71
BRE	AAGGATGTAAATGAAGACCC	53	43
BRE	CAGTTTAAATCGGTCACAGT	41	40
BRE	TGAGGCGGGAGCTCTCCCGG	88	33
BRE	AGTACTCACCTGCAAAGCTG	80	15
BRE	CTCCCCTTTCATATCTAGCG	62	9
BRE	TCTCCAAAGATAAAATCGGG	28	3
BRE	AAACTGCACATACCATATGC	33	2
BRE	TCTGGTATTCAAACATGAGG	17	2
BRE	GACCACGCTAGATATGAAAG	61	1
BTBD1	CAGCAGCGCCAGGAAGGCTG	105	86
BTBD1	TAGAGAGGTTCCCGCTGCAG	53	67
BTBD1	GATACCGGCTTTAGTTGTGA	73	48
BTBD1	GGGTTTACTGATATTGATAT	78	46
BTBD1	AATTCCTCAATTGTCATCAG	50	39
BTBD1	CAGCAAGTAGAAAGCCGCTG	62	24
BTBD1	GTGGGACGAGTGATCGAATC	100	19
BTBD1	AGACAAAGACTAGCAAGCTG	90	19
BTBD1	AAAGCCGCTGGGGTTACAGT	61	13
BTBD1	TCGGTCAATGTATTCAACTC	94	10
BTBD1	TCAGCAGCTCCGAGTTGAAG	91	9
BTBD1	AGAGAGGACGGTGAGGGCGG	54	8
BTBD1	GACAAAATTCCAGATTGAGC	33	6
BTBD1	GAAATACGCAGTCCCAGCCT	34	5
BTBD1	TACCTGAGTAAGTAACATAA	13	0
BTRC	GATAACAAGAGGATAGTCAG	102	416
BTRC	CCTACTGAAAGCTCGGGGAT	75	258
BTRC	GTATGATTGTGCCCAAGCAA	101	239
BTRC	GGCCATATCCCATACAGCAA	35	88
BTRC	TATGAAGACTGAGAATTGTG	63	84
BTRC	CAACTGACATTACCCTCCGG	87	30
BTRC	TGGTACCGAGTGACCTCTGA	61	26
BTRC	GTCCGACCAGCACCCTCCGG	97	26
BTRC	GTGTCAAATACTTTGAGCAG	64	21
BTRC	GATTATGGACCCGGCCGAGG	51	20
BTRC	TTGCTAAACATACTGTTTCT	65	12
BTRC	CTACAGACAAAACTTGCCAA	34	11
BTRC	ACGAGTTTATGTGCCCATGT	114	10
BTRC	GCGTTTCAATAATGGCATGA	35	10
BTRC	AGAGGCCTGGCAGAACGAAG	52	6
CACYBP	GAAGCAAGCCAAAGGAGACA	86	220
CACYBP	TGCAGGTGCATTTCACAGAG	70	78
CACYBP	TAATGAAAAACCAGCTGCTG	62	52
CACYBP	TTGCAGGTCATTTGATCTTT	142	49
CACYBP	AAGGTGGGATTACCTGACCC	101	47
CACYBP	TGAACTGCCTTCCACAGAGA	50	24
CACYBP	ACTTACCTCTTCTGAAGCCA	83	22
CACYBP	TCTCTTGAAACCCATCTCTG	44	17
CACYBP	AACCATTAATAAAGCCTGGG	49	15
CACYBP	CACCGTATAGCCCGTTGTAA	75	9
CACYBP	ATGCACCTGCACATTCTCAG	48	9
CACYBP	AGTTCCCACTGAGAATGTGC	22	8
CACYBP	CTTCTCTCTTGATTCCACCC	59	7
CACYBP	TGTGGTTGCTCCCATTACAA	43	5
CACYBP	AAAATCTACATTACCTTAAC	21	3
CALCOCO2	CAACAAATCAGCTAAACAGC	29	79
CALCOCO2	GAAGAAGCTCGAGCAGACAG	45	78
CALCOCO2	CAAAATCCAGGACTTGCCTA	59	38
CALCOCO2	GTACCTACTTCAGATGAAGG	48	35
CALCOCO2	AATACTCATCATCCTTGGGC	39	33
CALCOCO2	AATCAGAGTGGATCAGCTTC	88	29
CALCOCO2	CCACCTGCAATTTCTGTCCT	93	29
CALCOCO2	GTCCTCAGAAAATGAGAAGA	56	25
CALCOCO2	GCAGAGACAGAAAGAGAGAT	72	22
CALCOCO2	GGAGGCGCAAGACAAAATCC	59	21
CALCOCO2	TGCCAGATACTACCAGTGTC	69	19
CALCOCO2	CTCCTCATCACCCCAGACAC	76	18
CALCOCO2	GATGAGGATGGTGTGGTCCG	87	13
CALCOCO2	AACAAGAACTACTCAAATGG	28	8
CALCOCO2	CAGTTAAACTGAGAAAGAGG	17	5
CALCOCO2	AGAAAATGAGGAAGACATCC	45	3
CALR	GAAGATGACATGAACCTTCT	90	189
CALR	CCCTGATGCTAAGAAGCCCG	49	175
CALR	GAGGCCGAGCAGCAGCGGCA	68	97
CALR	TAGACGGGTGGACTTCCCGC	63	76
CALR	CCCAAACTCACCTTGTACTC	77	64
CALR	CAACAAAGGCCAGACGCTGG	85	62
CALR	GCCGCACAATCAGTGTGTAC	79	37
CALR	AAGGAGCAGTTTCTGGACGG	66	36
CALR	CAACGATGAGGCATACGCTG	70	31
CALR	CACCTAGGTCCCGACATCTG	111	28
CALR	CCGGCTCCTTGGAAGACGAT	57	11
CALR	GTAGACGGCAGGCTCGGCGA	65	8
CALR	TCTGGGTTGTCGATCTGCCG	55	7
CALR	GGAGTTTGGCAACGAGACGT	42	6
CALR	CGAGGACTGGGATGAAGAGA	67	6
CALR	GAAGATTGACAACAGCCAGG	53	3
CAND1	GACAGGTCAGAATTGAAGGA	52	211
CAND1	ACATGAGGATATACTTCCTT	89	171
CAND1	CCAACACAAGCCACCACTGG	61	90
CAND1	TATTAGCTCTGCATCAGTGG	77	32
CAND1	GGCCATCTGGTTATGAGCTG	96	25
CAND1	GGAGTTGCATCAAACGAGGA	42	23
CAND1	CCTTGAGAAGATAATTCCTT	68	17
CAND1	TCACCTAAAGTCCTTGTCGC	47	14
CAND1	ATCAAGTACCCCTTAAGCCG	53	11
CAND1	GAGGCCTGTTCTGGGAGAAG	72	10
CAND1	TGAGATCACCCTTATTGCAG	57	8
CAND1	GAACTTCCTCCAGCTTCCAG	19	6
CAND1	GTACCACATTTCCAATTTGC	33	5
CAND1	AAAGCACTGTGAGTGTGCAG	65	5
CAND1	CCTTCTTACAAATGATTCAA	28	3
CAND1	TCATCATCGTAATTATAATT	41	2
CAND2	GCTGGGCACCGAACCAGCTG	102	402
CAND2	GGGATGGCTGGAGGCCATGG	102	394
CAND2	GCTGGAGATGTGGAAGGCGG	80	258
CAND2	CGAGGACAGCGAGCGCAAGG	70	190
CAND2	GAAGAGGTCGGTGCTGCAGG	110	107
CAND2	ACGGCCTGCACGGCAGACGG	98	67
CAND2	CCGCACCCTGATCCAATGTT	121	56
CAND2	GCCACACAGGCCATCACAGG	117	38
CAND2	AGAAGGCCTCAAAAGCCTGG	76	30
CAND2	GGTGCGGATGGCAGTCGGGC	39	29
CAND2	CCTTCTGCAACTCCGACATC	127	28
CAND2	GGTTGCAGAAATCCTCCACC	55	16
CAND2	GGACACCCGCCAGCTCGGTG	96	16
CAND2	GATGCTGCTCCGGCTCCTGG	60	11
CAND2	CCATACATACTTCCTCAAGA	18	10
CAND2	GGTCAGCGAGCTCGACGAAG	71	9
CBL	ATCTTCTTGTCCACCGTCCC	127	360
CBL	GTTGTGTCAGAACCCAAAGC	41	328
CBL	GCAAACCATAAGCCTCTTCA	52	195
CBL	TATGGCCGGTCTGGAGGCGG	123	134
CBL	GCAGCCATGAGTCTCCAAGG	78	115
CBL	GGCCTCCAGCCCAGAACTGA	97	101
CBL	GATTACTAAAGCAGATGCTG	55	96
CBL	GATGTAAAGATTGAGCCCTG	104	86
CBL	GGGGCCATGGAGAATGGAGA	46	77
CBL	TCCCCAGGACAATAGTCCCT	80	61
CBL	GAGGGAACACATACTCGCTG	63	57
CBL	TCGGGTTCGGGTGGCCTGAT	86	47
CBL	CTATTCTTTAGCGCCAGCTT	71	19
CBL	AAGGCGGCTAGAGGGGACAG	72	13
CBL	CATCTTTACCCGACTCTTTC	42	9
CBL	GACGGTGGACAAGAAGATGG	87	7
CBLB	GGAGGTCTTTCAGGTGGCGG	117	112
CBLB	CGTAAATGCTGATATGTATC	98	87
CBLB	AGAAACCCTGGTGGTCGAGG	111	48
CBLB	TAATCTGGTGGACCTCATGA	80	43
CBLB	TGCACAGAACTATCGTACCA	60	30
CBLB	AGGAGGGTGGTAACTGGAGG	68	26
CBLB	AAAGTCTTACCTTCCGGGTT	64	20
CBLB	GGAGGATCTCTTAAGGGAGG	86	9
CBLB	GTGAATTCAGGGAAACAGGG	37	7
CBLB	TGATACGAAAGTTATCTCCC	55	6
CBLB	TTCCGCAAAATAGAGCCCCA	41	5
CBLB	GAAAACAAGAGACCCAGTAG	69	5
CBLB	GGAGGAGGAGGAGAAAGCCG	26	2
CBLB	TAGTCCCAAACACATCCCGA	52	2
CBLB	GGGATGTCGACTCCTAGGGG	47	1
CBLB	GAGGTGGGAGAGATGGAGGG	22	1
CBLC	GACACGTGGATGCGCTGCTG	119	215
CBLC	CGTGCAGCTCTGCGTGCATG	105	88
CBLC	GCCGCTGCGAGATCAAGGGC	76	84
CBLC	AAGAGCAATGCGTCGACCCC	83	44
CBLC	GAAGACGTCGAACTCGAAGA	47	30
CBLC	GAGGGACTCAAACTCAGCCC	81	22
CBLC	CAGCAGGTCCCGCAGCGAAG	102	19
CBLC	GCAGCGCATCCACGTGTCAG	120	18
CBLC	CCCAGCTACCTCTACCCAGA	39	18
CBLC	GCTGCACGCACTCTTCCCCG	71	15
CBLC	GCTGCAGGTGAGGTCAATGG	96	14
CBLC	GAGAGGTGGCCCATTCTCGG	68	11
CBLC	AGGGTGGCAGGTGCCCAGGA	69	11
CBLC	GGGAACAGCAGTGACCAGGA	45	7
CBLC	GGTCGACGCATTGCTCTTCT	76	4
CBLC	GTGTCCACAGTACTTTCCCC	44	3
CBLL1	GTTCATTTCTGTGACAAGTG	58	29
CBLL1	GAAGAACGGTATGACTGTAA	54	26
CBLL1	AAATTACCTTCATCACCAGG	28	23
CBLL1	ATGCCTGCAAAGGCTCCACC	90	18
CBLL1	GGAGTACCTGCAGCCTGGGG	70	18
CBLL1	GCAAATCAGCGAAGATTTCC	59	16
CBLL1	AATAGTTCTGGATCCTTGGG	126	16
CBLL1	TATAAACAGGATGCCTGCAA	34	14
CBLL1	GCAGAGGTCATTGGTGGAGG	79	13
CBLL1	ATACCTGAAAGTCCCAAAAA	40	6
CBLL1	GCAGGTGCTGGGGCAGGAGG	57	5
CBLL1	CACTTGTCACAGAAATGAAC	11	4
CBLL1	AGCCGAATCATGGATCACAC	23	4
CBLL1	AGGGAGATAAGATGTGTCCA	53	2
CBLL1	GAACTCAAAGAACTATAAAC	25	1
CBX4	CGTCGGCTGCCCGCTTCTTG	112	303
CBX4	GAGGCAGTTCGCGGTGACGT	119	285
CBX4	CCCTTGCAAGATATAACACG	74	218
CBX4	TGATGGGATATCGGAAGAGA	42	191
CBX4	TGCTGATCGCCTTCCAGAAC	96	149
CBX4	TGGAGAGCATCGAGAAGAAG	56	73
CBX4	CGAGAAGAAGCGGATCCGCA	68	33
CBX4	GGAACGGCAGGAGCAGCTGA	63	21
CBX4	TGGCGAGCACGTCTTCGCGG	74	20
CBX4	GCCGAAGCCCAAACCGCTAG	121	16
CBX4	ATATAACACGTGGGAACCGG	64	15
CBX4	GGAAGGCGATCAGCAGCCTG	61	15
CBX4	GTATTCACCTGCACCACTAG	61	7
CBX4	GAGTATCTGGTGAAATGGAG	53	5
CBX8	CGGCCGAAGCCCTCCTGAAG	99	446
CBX8	CTCTATGGCCCCAAAAAGCG	75	268
CBX8	GGGTCTGTACCTTTCCTCAA	40	194
CBX8	CCGGGAGGGCCTTCGAAACA	100	71
CBX8	GTACAGCACATGGGAACCGG	74	67
CBX8	GAGGAGGAAGGTTTTGGGCT	97	54
CBX8	ACTGCCAACCTACTTTGAGG	54	48
CBX8	CCCTTAGGCGAACCCAGCGC	108	46
CBX8	ACCTCGTGAAATGGAAGGGA	59	29
CBX8	CCGTATGCGCCGCTTCAGGA	40	29
CBX8	CTGCGAGCAAGCGAGCATCC	63	19
CBX8	GGAACCGGAGGAAAACATCC	23	18
CBX8	TCGCTTGCTCGCAGCCTTTG	101	17
CBX8	TTTCTCCAGGGAAAGAGAGA	34	9
CBX8	CAACATGGAGCTTTCAGCGG	64	8
CBX8	GCATGGAATACCTCGTGAAA	54	4
CCDC50	AGATGATTTCTCCCGCTCCT	97	269
CCDC50	GATATCATAGGCTACCCAGG	98	142
CCDC50	TCTGTCATGATAGGTGGTGG	92	132
CCDC50	GAACGTTCAGCGGAACCGTT	71	100
CCDC50	GGTCCAGCATGATCTCCAGG	47	79
CCDC50	GTAACTATCTGCATAAGCAC	31	77
CCDC50	GCAGGCTGTGAGCCAGGGTG	107	52
CCDC50	ACAGGTCTTTGTAGCGCTTC	68	40
CCDC50	TGTCCTGGAGGACCACACCC	107	39
CCDC50	AAGCTGCCTGGAGTCAAGGA	75	14
CCDC50	GGTGGCTAAGCAGCTCCAAG	58	14
CCDC50	AGAGGAAGATCTGAAAGCGC	52	9
CCDC50	CAAACCAGCAGAGTTCCACA	21	8
CCDC50	TTCATCTTGAGCTACTTGAG	67	7
CCDC50	GGAAATCGCTCGACTTCTAA	40	6
CCNF	GCAGGGACTTACAGCTCGGA	54	678
CCNF	TGGGTGCCGCACCTTTCATC	57	151
CCNF	ACTTACGGCCTTCATTGTAG	84	111
CCNF	CTGGCTGGACAGCTCCGCAG	56	58
CCNF	AGGGAGAGCTGAGGAAGGCG	74	57
CCNF	CTCCTTATTCTTCGCTTTGT	126	50
CCNF	GACTTACAGCTCGGACGGCC	68	46
CCNF	AGAGATCCTGACCATCCGGG	56	35
CCNF	GCTTCTTCAGTCTCGCTGAG	87	28
CCNF	GCAGCTGGCACTCTGCCCTG	96	15
CCNF	ATAGCCTACCTCTACAATGA	43	12
CCNF	GCAGCAGGGAGAGCTCGCAG	66	6
CCNF	GAAGGCGACCAGGAGAGTGA	49	4
CCNF	GAGGGCGAGAAGGAGGGCGA	9	3
CCNF	AAACTCACCACTTCTTATGG	62	3
CCNF	GAAGAGCCAGATGAAAGGTG	42	0
CDC16	GAGTGAGCACGACCAAGCGA	8	101
CDC16	GGGCAACTTTGAAAATGCTG	22	34
CDC16	ATATTACTTACAGGATTACT	42	32
CDC16	AACATGCCAGAAGATATCTC	31	19
CDC16	CTATGGACATTCATTTGCGG	23	10
CDC16	AAAGTAGCTTCACTCTCTCG	14	4
CDC16	TCAACACCAGTGCCTGACGG	2	4
CDC16	TTTCTATCTTTCTCATAAAC	23	3
CDC16	GTAGAGCTGAATAAAGCCAA	6	3
CDC16	TTACATGGCACCTAGCTGCA	41	2
CDC16	GAGCCAACCAATAGATGTCC	32	2
CDC16	CATGTCGTTACCTTGCAGCT	8	1
CDC16	CGTCCGGCAGTACCTCGACC	1	1
CDC16	TTAGGTGTCTTGGTTTGCAG	43	0
CDC16	GCGCCGCCATGAACCTAGAG	5	0
CDC20	GCGCTGGCAGCGCAAAGCCA	36	164
CDC20	GCCAGGAACATCAGAAAGCC	32	49
CDC20	TCTGACAGACCTGAACCTTG	10	14
CDC20	GTAACGGCAGGTCTTCCGGC	44	14
CDC20	GCCAACCGATCCCACAGCGC	38	13
CDC20	GTAATGGGGAGACCAGAGGA	6	10
CDC20	TCCACTGAGCCGAAGGATCT	26	6
CDC20	CAAGTTATCATTACCACCAC	22	4
CDC20	TTTCAGGCGCATCCAGGATA	19	3
CDC20	ACAGAGGATATATATTCCCC	13	2
CDC20	TTCCCTGCCAGACCGTATCC	8	0
CDC20	CAGTGCTGCCCAGATGGAGG	20	0
CDC20	CCAGGAACATCAGAAAGCCT	3	0
CDC20	ACCGTTCAGGTTCAAAGCCC	10	0
CDC20	CAGGGAAGGAATGTAACGGC	9	0
CDC23	GAGTACCTCCATGGTCCCGG	42	36
CDC23	TGGTGTGGTGCTTCGAAAAC	113	20
CDC23	CTTACCTCTGTAATAGGCGG	44	16
CDC23	AATGGCTGCGAGTACCTCCA	28	6
CDC23	CGAGAAACTCAATCAACTAG	18	6
CDC23	TAACCAGGCTCCCCAATGCA	62	3
CDC23	AGAGTTGCAGTTGATAGAGG	26	2
CDC23	GGAAATAGTAGAACACTTGG	13	1
CDC23	CCTGATCACAGACAAAGAGA	9	1
CDC23	GTTGCCTATCACAATATCAG	7	1
CDC23	GTGTTCCAGGTCGGCGGAGT	16	0
CDC23	ACCGCCTCCGCCTATTACAG	12	0
CDC23	GCCTACTACACAGTAGCAAA	12	0
CDC23	TTATTGGAGAGCTTACGCCG	18	0
CDC23	GGATATGGATGCCTATACCC	2	0
CDC23	AACCAGGCTCCCCAATGCAA	11	0
CDC26	GAAGATGTGGAAGTTGTAGG	64	390
CDC26	GAAGTTGTAGGAGGCAGTGA	70	293
CDC26	TGTCATCAAGCTTTAGCTCT	116	126
CDC26	GGGATCACTGCTAAGCCCAA	16	103
CDC26	AACGATTATTGGGCTTGGGT	80	92
CDC26	AAATTGAGATGAACGATTAT	87	22
CDC26	AGATGAACGATTATTGGGCT	56	19
CDC26	TTGACTTCAGTATGCTGAGA	39	13
CDC26	GAACATTCGAAAGGACCTGG	33	9
CDC26	AGAGTTTGAGAACATTCGAA	49	8
CDC26	TTAGCAGTGATCCCAAGAGC	39	6
CDC26	TCAGACCCGTAAGAAACAGA	22	4
CDC26	GTAGGAGGCAGTGATGGAGA	29	2
CDC26	AGTGATGGAGAAGGAGCCAT	37	1
CDC34	GTCAGGAACCGAAAGGCTGG	56	497
CDC34	CACCTTCTCGCCCGCAAACG	126	304
CDC34	GTGGCACCCTAACATCTACG	156	280
CDC34	GGTCGTCCACCGGCGGGTGG	85	177
CDC34	GCGCTCACCTCGTAGATGTT	128	111
CDC34	CAAGGGGCTGCAGGAAGAGC	79	109
CDC34	GGAGATCACACTCAGGAGAA	62	73
CDC34	GGGCACTAGCGGCCGAGCCA	70	31
CDC34	AAGGTGGACGCGGAGCGTGA	54	28
CDC34	AGGAAGTGGAAAGAGAGCAA	74	28
CDC34	GCTTACCTGACGTTCTGCGT	105	25
CDC34	GGGATTCCGCGTGACACTGG	74	22
CDC34	GGGCGATCTATACAACTGGG	71	22
CDC34	GGGAGCTGCCCTCAGAGAGG	58	9
CDC34	CCACTTCCTGTACATCACGG	42	9
CDC34	CTTCTACGACGACTACTACG	48	6
CDCA3	GACTGAGTTCCCCTCCAAAC	139	179
CDCA3	GTCCGTGCAATACCAAGAGT	66	82
CDCA3	CCTTTACCTGTCGTAGTGTC	82	33
CDCA3	GTACCTGGATGGGAGTGCGC	66	32
CDCA3	GGAGTTGTCATCCTGCAGGA	56	28
CDCA3	ACAGATAACTGGGTACCCAG	45	21
CDCA3	TGGCACCCTGACACTACGAC	92	19
CDCA3	ACACCTATGAAGACCAGCAG	84	17
CDCA3	ACAGCCCACAGAAACCCCTG	83	16
CDCA3	GCCAGATGCTTGTTGTGCGG	31	9
CDCA3	ACAGCCAGGCCTACCAGCAG	96	9
CDCA3	GGAGCTCTGGCTGGCCACAG	58	8
CDCA3	TCTAGACCCCCCAAGCCCAC	70	6
CDCA3	GCGTCCCAGTCACACCAGCG	61	6
CDCA3	GGAGGGTCTTAAACATGCCC	53	4
CGRRF1	GCCGGTGGTCACGATGAAGC	85	529
CGRRF1	GAAAACTCTTGTGCTGAACT	105	186
CGRRF1	TGCACCCCCAGTAGCATGTA	77	108
CGRRF1	AGCCTCCTTACATGCTACTG	87	60
CGRRF1	CCACCGGCCTGGTATTGGGA	88	57
CGRRF1	TTCAAGGCAATCTGTTGTCA	103	50
CGRRF1	GCTATTGACCTTAGCTGATG	89	37
CGRRF1	GAGCAAGACCCTGATGGCTG	128	19
CGRRF1	CCGGTCATCCTCATCAGCTA	39	18
CGRRF1	CAGTGATTCATATTCCTGAT	94	17
CGRRF1	ATAGCCTCCTTACATGCTAC	90	16
CGRRF1	AAGGTCAATAGCGCTACCAA	27	8
CGRRF1	ACACTTACCATCCCAATACC	36	6
CGRRF1	GCCGCTTTTCTACATCGCGG	60	2
CGRRF1	ATATTGATACAATATTCTGC	17	0
CHD6	AGGCCATACCTCCGCCTGCC	102	683
CHD6	CTGGCTGTCTGTAGACTCAG	88	186
CHD6	GAAGGCACGGAAGCCCCGGG	77	93
CHD6	GAGATGATGCAGCCACGAGG	74	47
CHD6	CAAGAAAGGAAGCTTAGAGG	41	39
CHD6	AATGGGATGGAGGACAGTGG	64	28
CHD6	GGAGCAAGGACCAACCCCAG	59	24
CHD6	CCTGGACAGTCTTAGATGCC	92	22
CHD6	TGCCCTACAGAAACGACGCT	64	17
CHD6	AAAGGAACCCAGAAAGGCCA	63	16
CHD6	GCCTGACGAACCCATCTCTG	93	12
CHD6	CAAGGAGCCGAAGAAGGCCA	69	12
CHD6	AAGGAGCCAGGAGACCAAGA	69	10
CHD6	ATGATGTTTGCATCATCTTC	108	8
CHD6	ACTGCTGGTTAATACCGGGG	71	7
CHD6	CGAGGAGGAAAACTTAGCCA	40	4
CHFR	GGATGAGGTATGCTTCCACG	108	633
CHFR	AAAATCAGGTCAGGTGACAC	124	261
CHFR	TGGGAAGCCAGACAAGATGG	71	242
CHFR	GAGGACGTCAGAGCAGCGGC	83	99
CHFR	ATGTCATCTACTTGGTGTAC	112	86
CHFR	ACAGCAGAAACACTCCCCGC	65	82
CHFR	GACATGCCCTTTACAGACTG	94	61
CHFR	AATCCCGATGGAGCGGCCCG	91	44
CHFR	GTGAAGAAGAAAATGAGAGG	45	34
CHFR	AGCGGGAGTGGACCATCGGG	56	33
CHFR	ATGACATCCCCAGTCTGTAA	43	17
CHFR	TCGGGTGCTGGGCAGTGGGG	72	11
CHFR	GACTTCATCACTTGCCACAG	67	9
CHFR	TTCCTTCCCCAGCAATAAAC	34	8
CHFR	AGGGCGTGGCTTCCTTGCAG	56	6
CISH	CAAGGGCTGCATGACTGGCT	70	262
CISH	CCGCCTTGTCATCAACCGTC	77	217
CISH	CGTACTAAGAACGTGCCTTC	71	212
CISH	GGACATGGTCCTCTGCGTTC	110	57
CISH	AGATTCCCGAAGGTAGGAGA	75	38
CISH	GGCTTGGGCAGTTCCAGGGA	54	33
CISH	TACCCTCTGCCACCTCCTCG	79	28
CISH	GTCCGCTCCACAGCCAGCAA	77	27
CISH	TCCAGGGACGGGGCCCACAG	107	26
CISH	CCAGACAGAGAGTGAGCCAA	62	20
CISH	AGGAAGGCCCCAGCAGGCAA	88	16
CISH	TTCTAGACCTCGTCCTTTGC	63	13
CISH	CAGACTCACCAGATTCCCGA	16	7
CISH	GCGCTTACCCCTGAACGCAG	34	3
CISH	AAAGGTGCTGGACCCAGAGG	47	3
CLTC	GAAGTTGGCACACCACCTAC	101	276
CLTC	GATCGCCATTCTAGCCTTGC	100	139
CLTC	TGCAGCTATATTCTGTAGAT	64	115
CLTC	AAAAGTAGGAGAGCAGGCCC	62	85
CLTC	AAAGTGTCTCAGCCCATTGA	71	21
CLTC	ATGGCGCTGTCTGCTGAAAT	136	19
CLTC	AAGAATAATCGCCCATCTGA	27	8
CLTC	AGTGCAATTACTTTGCTAGC	36	7
CLTC	TCCTTTATAGCAAAATCGTG	58	6
CLTC	GCAGTTCGGGGCCAAGCTGG	73	6
CLTC	GGTATCAACCCAGCAAACAT	12	4
CLTC	GTAGGCCTGTACTTCAGCAA	43	2
CLTC	GAATACGGTTGCTCTTGTTA	75	1
CLTC	TGGCTGAAGAACTCCTGCAG	14	1
CLTC	GCCCTTTCCAAAGAAGGCAG	27	1
CLTC	GTACTCCAGACACTATCCGT	12	0
CNOT4	GAGAGTGGTTTATAAACTGC	66	631
CNOT4	ACAAAGTGACACCACTGCAG	67	502
CNOT4	TACGTATCATACCTCTGCAG	40	159
CNOT4	ACTGTGATTGGATGAACTGA	61	58
CNOT4	GATTTTGACAAACCAGGTGG	62	29
CNOT4	AGAGGAGTTCTGAAGAGATG	48	26
CNOT4	GATACGCCTTCACCACCACC	101	23
CNOT4	CCAAACTTCCCAAAATATTC	23	8
CNOT4	GTCTCGCAGTCCTGATGCGA	69	7
CNOT4	ATGCAAAGAGGGCACTCCAC	61	6
CNOT4	GACTTACCTCTGGGTCTGCT	75	6
CNOT4	AATAATAGCACATCATATGC	26	3
CNOT4	GGAGGAAGCCCACTTGGGAT	74	3
CNOT4	TCAGCGCCTAGCAGACCCAG	93	2
CNOT4	AGAGATGTGGGCGAAAGGGA	49	1
COPS5	GGCTACAAACCTCCTGATGA	39	506
COPS5	GGGTGGTATCATAGCCACCC	113	36
COPS5	AAGTGAATCTTGGCGCCTTT	70	32
COPS5	CTTAATAAAATAGAAGATTT	27	13
COPS5	GGAACTGGCCAACAACATGC	7	12
COPS5	GTGATGCATGCCAGATCGGG	11	10
COPS5	AAAGCCAGCAGCCATAGCCA	38	5
COPS5	CAAATCAAAGACCTGACCAG	15	4
COPS5	CTTACCACCACTGCTACAAA	25	3
COPS5	GTACTGCAAAATCTCAGCAT	7	2
COPS5	ACAGCAGCAAGAAATCCTGG	7	1
COPS5	CCAGGAACCATTTGTAGCAG	11	1
COPS5	CCAACAAGAACAATATCCGC	7	0
COPS5	TATCATAGCCACCCTGGCTA	13	0
COPS5	GCCTTGAAAATGCAATCGGG	6	0
COPS6	AGTTCATCACCTCGATATTT	93	87
COPS6	GGGCGCGGGGAAAATGGCGG	61	49
COPS6	ACAGAGCATAGGCCTCCCGC	39	37
COPS6	GCAGCTACGAACGGGACCGG	52	30
COPS6	CGAATGACAGCAACAGGCAG	74	24
COPS6	CAGCCGCGTCAAGCTCATCT	116	22
COPS6	TGAGCTGCTGTCCCACACCG	29	18
COPS6	GAGACAGTGACACAGAGCAT	28	16
COPS6	TGCATACCTGCTTATGGACG	87	11
COPS6	GGACATCCACGTCCATAAGC	19	9
COPS6	GACCGGAGGAAGCAGCGGGA	73	9
COPS6	GCATGCGCTCCCAGGAGGGG	71	2
COPS6	GACAAGGGGATGGAGAGCGA	14	2
COPS6	GCAGGAGGGCCGAAATATCG	29	1
COPS6	ACTCCAAGATGAGCTTGACG	24	1
COPS6	GAGATGTTGAGAATGACAAG	1	1
CTNNB1	AGAACGCATGATAGCGTGTC	87	179
CTNNB1	AATGCAGTTCGCCTTCACTA	52	175
CTNNB1	GCATGTTTCAGCATCTGTGA	69	163
CTNNB1	GACAAAACTGCTAAATGACG	49	61
CTNNB1	GATGGAGTTGGACATGGCCA	64	54
CTNNB1	AGTGAAGGCGAACTGCATTC	120	39
CTNNB1	AAGGTTATGCAAGGTCCCAG	101	36
CTNNB1	GAAACAGCTCGTTGTACCGC	68	29
CTNNB1	GAAGCTGAACAAGAGTCCCA	46	24
CTNNB1	AAAATGGCAGTGCGTTTAGC	78	21
CTNNB1	GAGTGGTAAAGGCAATCCTG	47	12
CTNNB1	CATCCAAAGAGTAGCTGCAG	82	10
CTNNB1	GCAGAAGCTATTGAAGCTGA	45	10
CTNNB1	GTGATGGTTCAGCCAAACGC	55	7
CTNNB1	AATGCCTCCAGACTTAAAGA	13	6
CTNNB1	CTCCTTCTTGATGTAATAAA	26	2
CUEDC2	GCAGATGCTGGTAGAGGGAA	59	1052
CUEDC2	GGAGGCTTTCACTGAGATGA	51	605
CUEDC2	ATCAGAGGAGAACTTCGATA	75	284
CUEDC2	GCCTGCTCCACCGAACAGGT	71	116
CUEDC2	AACCTGCAACCGCAGAGCTC	83	72
CUEDC2	CTGAGCGATGCCAGGAACAA	128	67
CUEDC2	GACCCGTCTCTACCTGAGGT	87	67
CUEDC2	GACCTGCCCAGACGCCTCAG	90	29
CUEDC2	GGAGGAGCTTCTGCCAGGGG	37	23
CUEDC2	GGTGTGTCTGGACAAAGGCA	66	19
CUEDC2	TCTCCCCAGAGCCCCTGCAG	77	19
CUEDC2	ATATCGAAGTTCTCCTCTGA	97	18
CUEDC2	GGTGTTCCCTACCTGTTCGG	91	18
CUEDC2	CAGAGGATCAGAAGATTCAC	91	12
CUEDC2	GAGGGGCCTGCAGCCTGGGA	69	6
CUEDC2	GACATGATGCAGAAGCTCTC	41	3
CUL1	TCTGCATTCAACAATGACGC	38	712
CUL1	GTTCGCCGTGAATGTGACGA	44	303
CUL1	ACAGTGGCCGAAAATTGACG	97	204
CUL1	TACATTTGCCTTGCCGTCAG	57	118
CUL1	GGCCAATCTGCTTCAGGCCG	100	56
CUL1	GAACTCCAGCTCCTCGTGCT	70	52
CUL1	CTTTGTGGCTGCTCTTGATA	41	43
CUL1	TCCTCCTTCTAAGTCGAAAA	17	36
CUL1	CAGTTCCAAGAACCCAGAGG	35	20
CUL1	GGTCGTCCCAGATCTGGTCC	92	17
CUL1	CACCAGTCAAACCAAGCACG	62	12
CUL1	CATCCTTACCTCTGACGGCA	30	9
CUL1	GACTCGAGGTTTGAACCTGG	23	7
CUL1	GTATCGAGCCAGCAACTCAG	11	4
CUL1	GGACCTCGCCAAGTAACTGC	33	3
CUL1	GGTCAGCTGCTGCACAGTGT	8	1
CUL2	ACTGACTCCACAAATAGTGT	33	380
CUL2	TTTGACGACAATAAAAGCCG	32	292
CUL2	AGATATGAATGAACCACTTA	99	271
CUL2	CACCACCATAGCCATACTGA	37	118
CUL2	AGATATCTATGCTTTATGTG	83	24
CUL2	TCATGTTCGGCATTTGCATA	93	22
CUL2	GAGCAGCATTCGGATAAGGA	41	20
CUL2	GGGCAAACCATATGTAGCCA	42	16
CUL2	GGAATTGCAAACGTAGATGA	47	16
CUL2	CAAAGGAGTTAATAACCCCA	30	7
CUL2	GCAAAACCACATCCATGATG	60	5
CUL2	ACCACTTATGGAAATAGGAG	16	4
CUL2	GCTGGTAAACTCATAACCAC	23	1
CUL2	AATACGTCGAAAGAGCAACA	22	0
CUL2	GTACTGGGAAGAATACAGCA	14	0
CUL3	AAAGCATGTCTTGGTGCTGG	100	465
CUL3	GATGGATCTGAAGTTGGTGT	70	59
CUL3	GTCGAATCTGAGCAAAGGCA	66	28
CUL3	CAAAGGCACGGGCAGCCGGA	30	15
CUL3	TTATTTAGTCGTGTGCCAAA	41	14
CUL3	ATGTCAGTTCACGTCAAAAC	21	13
CUL3	TCTGCAGACATTTCCAAAAA	34	12
CUL3	CTTACCTGGATATAGTCAAC	45	6
CUL3	GTGTTGGTTTACCACAGGCG	63	6
CUL3	GACCTAAAATCATTAACATC	42	5
CUL3	GCACAATGTTCTAGTAGCGG	15	4
CUL3	GCCGGAAGGACACCAAGATG	31	3
CUL3	AGAGACTCACCGGAAAGGCC	27	2
CUL3	GGAAGAACCAATTGTAAAGG	19	1
CUL3	GAGCATCTCAAACACAACGA	13	0
CUL4A	CTCTTTCCTGCATTAACCTT	102	302
CUL4A	GCAGGTCAGACAGCATGCCC	95	260
CUL4A	ATGTTGTCAAAGCTCAAGCA	68	207
CUL4A	GCGGTTCGTCAACCTGATGA	88	165
CUL4A	GGAGCACCAGTGTCTGGAAG	60	150
CUL4A	CCATGTAAGTAAACGCTTAG	74	125
CUL4A	GAAACCACTGATTGCTTGTG	133	110
CUL4A	CCTCTAAGCGTTTACTTACA	60	104
CUL4A	ACAGTGGTCGAAAACTTCAG	64	64
CUL4A	GTGCTGATTAAAAGTCCCAA	40	24
CUL4A	GGAGCTTTCGAAGGACATCA	56	23
CUL4A	AAAGGAAAGGAAGTGGAAGA	68	12
CUL4A	GAAGGATCTGTGCCTGGACG	120	11
CUL4A	TTCTCCACACAAGCAATCAG	34	8
CUL4A	AATTGCTTATATGCTGCCGA	40	7
CUL4A	GGTGCTCCTCATGTTCAACG	50	6
CUL4B	ATTCAATGCTACCCTCCATT	79	391
CUL4B	AGTTGGTGAAGATGAGGAGG	54	133
CUL4B	AGCTTACCATTTGTCTGCAA	47	125
CUL4B	GGTGCTGGTATTACCATCAG	90	64
CUL4B	TTCATTGGCAGATCATGATC	68	30
CUL4B	TTACTCACCACCGTCTTTAG	79	18
CUL4B	TGAGCAGCAGCAGCAGCTGA	73	18
CUL4B	GAATCCCTGGGTTGTAAAGG	69	17
CUL4B	CGGATGATGTCACAGTCATC	91	14
CUL4B	TAAAGAAGATTGATAGATGC	59	13
CUL4B	GCTGCGTTTTGAAGACACCC	44	13
CUL4B	GCAGAAGGACGAGGTTGAAG	74	10
CUL4B	TAAAGGAGGAGTGGAAGAGG	48	7
CUL4B	GTAGATTCAAAACTTCGTGC	37	3
CUL4B	GCTGTTAGCAAAGCTAGAGA	20	2
CUL4B	GAATTCGGTTTTCATCAAGG	34	0
CUL5	CAATACAGCGAGCTGAAACG	53	250
CUL5	AATCTGTTACAAAACAGCAG	33	221
CUL5	ACTCCTGGTTCACTGAGAAG	95	204
CUL5	GTTTGCAGCTCACTACAGAA	33	187
CUL5	ATAGGAAGTTGGTATGCCAG	87	169
CUL5	GCCAATGTTGAAAGACTTGG	57	115
CUL5	GAGGAACATATCATTAGTGC	53	58
CUL5	CCAGCTTCATTGCACTATCT	83	41
CUL5	CGTAAAAGCTTCAAAACAAT	11	23
CUL5	TCACCCAAAGACTTTACAGA	31	22
CUL5	CCCTCGTATTTACAACAAAA	24	19
CUL5	CCAAGATAGTGCAATGAAGC	62	19
CUL5	ACTACGAATACTAAGAACCC	67	16
CUL5	TAACCTTTGTTCTAATCCTG	43	14
CUL5	GGAATGCTGTGTAAATGCCC	65	13
CUL5	AGCTTGTTTACATAATCCGC	24	10
CUL7	GTCCCGCACATACAAAGCAT	27	166
CUL7	TGAACACCCCATGTCTTTCG	83	87
CUL7	GGATCTGGAGAACCTCCTGA	40	78
CUL7	GAGGCTGGAAGATGGAACCG	79	62
CUL7	GGAGTGTGAACACCTGACCC	91	38
CUL7	CTGAATGCCCTCGAAAGACA	31	33
CUL7	AACCCTCCACCAGACGCTGC	72	21
CUL7	AAAACGTCTTGACCTCCTGA	60	18
CUL7	ACAGTGCTAGCAGAGCACAG	81	16
CUL7	TGGAGGGTTATGGTCCAGCT	81	14
CUL7	GAGTTCCCACCACTCAGCCA	79	14
CUL7	GCCCATCATGGCCCACGCGC	67	13
CUL7	GCAGCTGGTGGACTTCCCCG	33	5
CUL7	GGAGGGCTGAGCCTGGGCAG	34	4
CUL7	GGGCAGCCTCGTCATCAGGG	41	2
CUL9	GCATTTTGCCTGCACTCCGG	114	184
CUL9	CCAGAGTCCGCAGCAACAGG	73	130
CUL9	CATCGACTCAGCCACACGCC	141	127
CUL9	GAGCGGCCGCCACTCGTGCT	138	121
CUL9	AAGATGGACCGGGTTGGCCG	126	85
CUL9	CGTGAAGTAGACGAGCTGCT	77	43
CUL9	ACCCCTCAGTATTCAGCATC	82	26
CUL9	AATGGCCGAGAGTCTGCTGC	63	25
CUL9	CATAGGATTCCAGTCCCAGG	63	17
CUL9	GCCACAAGAGAGAAAAGCCG	21	10
CUL9	TGTGCTGCCCACCTGCACAG	62	10
CUL9	TGCTCATGACCAAGCACGAG	59	9
CUL9	GAAGCTAGTGAAGATGCTGG	86	9
CUL9	GGGCGGCCTCATCATCAGGG	58	8
CUL9	GGAGCTGCTGACCAACCAGG	58	5
CUL9	AAAGAGACTAGAGGAAGAGG	39	2
CYLD	GACTGGGCTGACAGAGAAAG	58	198
CYLD	GTGGTCAGTGAGTTCACAGG	43	139
CYLD	ACTGTCCTCTCTGCTAACAG	61	71
CYLD	AGAGTGTGACGCAGGAAAGG	81	48
CYLD	AGAGTGGAATCTGTTCTCGG	85	27
CYLD	ACTTAGACTCAACCTTATTC	61	23
CYLD	AACAAGAATTGTAATGACCC	61	22
CYLD	GCATTGGAAAGTGATTACGC	45	20
CYLD	GAAATACCGAGTGCCTCTGA	91	19
CYLD	CACATCAATGATATCATCCC	30	6
CYLD	TAAAGGCCTCCAAATAGACG	60	6
CYLD	AATTTCTAGGATAACCCTAT	42	5
CYLD	AAAGCTCCTTAAAGTACCGA	31	5
CYLD	AGAATATTCAAGAATTCCTC	20	1
CYLD	TAGAACCTTTGCTAAAAATA	21	1
CYLD	GGATTACCCCATAGAAAGGA	7	1
DCAF15	AGGGACACGCACACCCGGGG	42	206
DCAF15	CCAGCTCAAGAAGGACCAGG	52	117
DCAF15	CGAGTGGACGGAGACGGCGC	76	110
DCAF15	GAGGACGTAGCGGCCGCATT	76	93
DCAF15	CAACACCAGCTACTCCCTGG	61	80
DCAF15	CTGCGCCGTCTCCGTCCACT	123	40
DCAF15	GCTCAGAGTGCGCACGGCAG	97	35
DCAF15	GGAGACCCAGAAGAACGGGC	42	33
DCAF15	TGACATCTACGTCAGCACCG	74	22
DCAF15	GGGCCTACCTGCCGAGTGGA	59	18
DCAF15	ACGAAGATCAGTCACCACGA	41	12
DCAF15	GGCGGGCTGGAAGGTGGGGA	87	10
DCAF15	GAAATCGGAGCGGAACAGCG	55	8
DCAF15	GCAGCTTCCGGAAGAGGCGA	42	8
DCAF15	CGTGTCCCTCAAGAACATTG	31	3
DCAF15	TCTACATCTACCATCTGTAC	34	1
DCST1	GTGCAGAGGCTCCTGACCTG	75	2664
DCST1	GGACTACGTGTACCGCCAGG	72	261
DCST1	GCTGCCACTCCGCAAAGCTG	99	216
DCST1	GGCTGCCAGTCTCCTGTAGC	48	202
DCST1	CGCCTTGGCTGCCATCTATG	110	149
DCST1	GCATCCAGGCCCACAGGCTG	116	137
DCST1	CCTACTAGTACCCAAGATGC	54	49
DCST1	GCAGTGACAGGAAACTCGCC	58	22
DCST1	GCGCCACAGGAACCAGCTAC	81	18
DCST1	GTGCCGCAATCGCATCCCAG	79	14
DCST1	GGCACAGCGGATGTGAGGGG	72	10
DCST1	AGTACTGCAGGAAGGAGTGG	52	8
DCST1	TCAGGAGGGCCGCTATCCTG	58	8
DCST1	GCATCTTGGGTACTAGTAGG	43	6
DCST1	GCTTGCGGTCAAACCAACGA	54	5
DCST1	GACATTAAACATCATCAGAA	11	1
DCUN1D2	TTCACCTTCGCTAAGAACCC	50	220
DCUN1D2	TCACCTAAACCTTTCTGCCC	85	173
DCUN1D2	TCATCGCAGGTGTGACAGCA	85	171
DCUN1D2	GGAGTCCATGCGGAACGCTG	58	64
DCUN1D2	AAGACTGGAGCAGGAGCTGA	46	58
DCUN1D2	AAAGGCTCTTCTGCCAAGAC	70	54
DCUN1D2	GTTTTGGAAGAAGCTGTCCG	76	45
DCUN1D2	TATTGGAAATTAGTGTTATC	79	38
DCUN1D2	GAGTGCACGCCATAAACTGG	34	35
DCUN1D2	TAAATCGTCTCAGAAGGACA	69	15
DCUN1D2	ACTGCTTAACGCAGAATGAG	88	14
DCUN1D2	GGACACCTGGAACCTCCTGC	73	12
DCUN1D2	CTGCCCTGGGTTCTTAGCGA	43	8
DCUN1D2	GAATGAGTGGAGACTAGACG	46	6
DCUN1D2	TGGACAAGAAGAAGCTGGAG	61	6
DCUN1D2	CTGATAAAAATCTTTAAACT	23	1
DDA1	TCGGTCCGCGCCACCTTGCG	119	399
DDA1	CTGTTCAGACGGGTACTCGC	21	268
DDA1	CGACAGCCCAGACATGCACG	136	207
DDA1	CGGGTAGGCAGGTAGACTGA	53	168
DDA1	GAGCTCCGCACCTCCCCGCA	137	61
DDA1	GCCACTTACTCTGTTCAGAC	50	58
DDA1	GGACTCCGTGTGCAAAGCCT	40	42
DDA1	ACTCACCGAGGCTTTGCACA	153	39
DDA1	GCGCTACCTGCATCAGCAAT	94	21
DDA1	GGCCACTTACTCTGTTCAGA	55	19
DDA1	CAACCCTCCTGCAGAACCGA	46	12
DDA1	GAAGAGAGACCAGGAGCAAG	50	10
DDA1	GCGGGTAGGCAGGTAGACTG	39	6
DDA1	TGCGCTACCTGCATCAGCAA	37	2
DDB1	GCTTCGGCCCGTCAAAGAGG	86	260
DDB1	GAAAGGGGCCGTGTACTCTA	52	195
DDB1	GGAGCGGCAGCACCTCCAGG	28	171
DDB1	ATACATGCCCACCTCTTTGA	41	22
DDB1	GGGGCTTCGGCCCGTCAAAG	60	13
DDB1	AAAGGCCATCATAGAGACGC	32	12
DDB1	CTCGAGACTTTAATCCCAAC	55	6
DDB1	GGTAGAAGAAACCGAACTGA	22	4
DDB1	ACGAAAAGTCCTCAATACGG	23	4
DDB1	GGAAAAGACCAACCTCCTGG	19	4
DDB1	CCTCACCGTGCTATTGATGC	39	3
DDB1	TAGCCGCCCCAAGATGCAGG	5	2
DDB1	GGTCACGCAGCCGTTCACGG	6	1
DDB1	CATGGAAGGAAACTTTGAAG	22	1
DDB1	GTGCACCTTCAAAGGTGTGT	52	0
DDB1	GAAGAGGCAGAGCCCAAGCA	32	0
DDB2	CCGAGATTGTATTACGCCCC	70	664
DDB2	ATACAATCTCGGAGGTCTTC	70	197
DDB2	CACCATGCCGCAGCATCGTC	43	177
DDB2	CTTTGCCGTCCATGTTCAGC	79	29
DDB2	GGTGCTGGAAGTGACGGTGA	38	28
DDB2	TGTGTCTGCTAGTAGCCGAA	49	22
DDB2	AGTTGTTCCCTCCATTGAGG	45	22
DDB2	ACTAGGCTGCAAGACTTTAA	39	21
DDB2	GTGGTCACAGGAGACAACGT	42	19
DDB2	GGAGGGCTACATCCTTGGCG	52	18
DDB2	GATGTGACTCAGACTGCCTC	62	18
DDB2	GGCCAAGAAGCTCTGTGCGA	61	14
DDB2	CAAGAGGAGCAGGAGTCCCC	49	9
DDB2	GGAGGGTCCTGACGATGCTG	59	7
DDB2	GAGTTTACTCTGCTTCCCAG	54	7
DDB2	GGGGCGTAATACAATCTCGG	24	4
DET1	TATGCGACACTGCTGCACGT	85	735
DET1	GTGGTCTTGTCACACAACCA	60	631
DET1	ACGTGCGTGTATCACATAAG	100	134
DET1	CAGGCAAGGCAGGTACCCAC	90	95
DET1	AGTGTACCTCATACCTGTGA	86	48
DET1	CAAGTATGGAGGGCACACAG	79	47
DET1	GCAATAAAGTAGCGTCCATC	74	39
DET1	GCGGGACAGTCAGACAGGCA	89	36
DET1	TGTCCAATGGCAATGACCAG	88	21
DET1	GTACAATATGGTGACGACAG	93	20
DET1	GTGGAACAGCTTACCGGCGC	101	19
DET1	GGCACACAGAGGCAGTACGC	70	18
DET1	ACGTGCAGCAGTGTCGCATA	93	12
DET1	AGTTGGGGAAGACATTCTGA	98	9
DET1	GACCTACTGCAGGGATACGA	22	2
DNAJB2	GCGGCGTCCTTGGACAAAGG	79	494
DNAJB2	CCAGACCTGGAAGTGACTGA	65	224
DNAJB2	AAGGAGCTCTCACCTGCGTG	110	208
DNAJB2	GAAATTTAAGGAGGTGGCCG	55	184
DNAJB2	TTTCTGCAGGTATCGGCGCA	128	133
DNAJB2	GACCTCCTCGGGGCTGCGGA	73	112
DNAJB2	GCAGCTGGGAAGAAACCCGC	47	107
DNAJB2	CTGAAGTCAGTCACAATCAA	108	38
DNAJB2	AGATTTACGACCGCTATGGC	93	20
DNAJB2	TCAGCAAACTCTTTATTATC	52	12
DNAJB2	AGGTCTTCCGGGAATTCTTT	98	8
DNAJB2	GGAGAACGGGCAGGAGCGGG	50	8
DNAJB2	GACGCCGCATCACCACACGC	51	6
DNAJB2	GGAGCGGGTGGAAGTGGAGG	24	1
DNAJB2	GGAGGAAGAGAAGGTAAAGA	61	1
DNAJB2	ACTGAAGGAGAAAGATGAGG	34	0
DPF1	GAAGCACCCCTGAAGAAGGA	49	718
DPF1	GTTTCCGCATGACCTCGAGG	48	378
DPF1	GGAGACCATTATGGACTGTC	85	351
DPF1	GAAGAACAGGGCCAAAGGAA	52	278
DPF1	CAAGAAGACGGGGTGTCCCG	92	68
DPF1	TGGAGGATGACATTCCCAGG	86	42
DPF1	ACGGAGACTCAACATCCTGG	59	37
DPF1	ACACGTACCCCGCCCGCTGT	113	25
DPF1	TGGATGGAGAAGACCCACCG	71	19
DPF1	AAGGAGGGTGGCCTCCCGGA	92	18
DPF1	GAAGAAGATTGAGCTGAAGG	64	15
DPF1	ACGCCAGGACACCGCTTCCC	150	13
DPF1	TCCCCACAGGCATATGGCAT	75	8
DPF1	GCAGCCAAGAAGGCGCCCGA	75	8
DPF1	CCCACCGATCTTGTACTCGC	50	4
DPF2	CAAGAAGACGGGACAACCCG	57	790
DPF2	TGGATGGAAAAGCGACACCG	50	485
DPF2	GATACACACGTCATTCTCGG	17	368
DPF2	GGGGCACCTCGCTTCTCCAG	62	52
DPF2	GCACTCACTGTCACAGGCAT	79	42
DPF2	GCACGCTGCGCTCAGCACAG	48	37
DPF2	GACCAACAGTCGAGCGCGAA	88	23
DPF2	AAGAAGATACTCCCAAGCGT	39	22
DPF2	GAAAAGCGACACCGGGGTCC	114	16
DPF2	TCCTTCCCATCTATTAAGCC	31	14
DPF2	ATAGATGGGAAGGAAAGTCG	31	12
DPF2	TACCTTTCGCGCTCGACTGT	60	11
DPF2	GTAGGAGTACAGCTGTCCGG	33	11
DPF2	GAGGGGCTGATCTCTCAGGA	53	8
DPF2	AAGGAAAGTCGTGGATCCTC	55	7
DTL	GGATGGATTGCACTTTGCCC	78	295
DTL	ATGCCGTCTTTGACCTGGCC	109	214
DTL	ACAGCTTGGGGCACAAGCTG	30	103
DTL	GTAAAAGCTGGTGAGCTGAT	121	27
DTL	TAGAAAAGGCAACTGACTTG	20	23
DTL	CTTACAAGTTTAAGTTCACC	50	18
DTL	TGCTAGTACATGTTCCATAT	94	14
DTL	CTGAGAGGCCCAACCCACCG	42	13
DTL	CCAGAAGTCATCCCAAGCAG	42	11
DTL	CTAGCAGTTGCCAATGAAGA	60	4
DTL	GAAGCAGGTGGAGTGATGGG	44	3
DTL	TGCACTGATAACCAGTCAGA	48	1
DTL	GAGAAGGTACATCCAAAAGG	3	1
DTL	GAGCTGATTGGAACATGCAA	6	1
DTL	GTGTCCATCTGACTTCACAA	4	1
DTL	AGGTGATAAACTTTCCACGG	20	1
DTX1	CCTACGAGAAGCAGCACCCG	101	244
DTX1	CCATCCCTAAGTCGCAGTCG	101	113
DTX1	TGGGAGTGGGAGAACGACGG	60	33
DTX1	TGAATGAGCACAGCCGCTGG	94	26
DTX1	ATGTCACGGCCAGGCCACGG	90	21
DTX1	GCAGAACGTGGCCCGGGTGG	110	20
DTX1	AGATGAACCGCCAGACGCGC	74	19
DTX1	TCACAGGCATCAGCCCACCG	130	18
DTX1	GGTCACAGCATCAGGCTACG	98	13
DTX1	GTGCTGAAGGAGGACGCTCG	84	11
DTX1	CAACTTCTACGACCCGTCGT	100	10
DTX1	TGCTTCGGCACAAGGGCGTG	80	10
DTX1	TCAGCACGTTCTCAATGTGG	91	10
DTX1	GGTTCGAAGATACATGCAGA	50	9
DTX1	CCCTGCAGGTAAGAATCCCG	50	9
DTX2	CTCGATGAAGCTGCAGACGG	109	858
DTX2	CTGGGGAGGTCAATAATGTA	93	231
DTX2	AGCCAGCGTCTGTGACTATC	104	217
DTX2	GCAGGTGTACACCAGCCCCG	170	143
DTX2	GTGTCTCCGCACAGCCCGCA	85	79
DTX2	GGCAATCGGGTCCCTAGCTG	80	39
DTX2	GGGTTTGTTGTACGGTGCAA	77	33
DTX2	GTGGCGGTAGCGGCCTGACA	62	25
DTX2	GGCGGTAGCGGCCTGACACG	133	20
DTX2	GCCGTGTGGGAATGGCAGGA	55	19
DTX2	GGGGAGGTCAATAATGTAAG	48	18
DTX2	GGTGAGGTGGCCCACAGCTA	76	17
DTX2	TGTGGCCGTGTGGGAATGGC	97	16
DTX2	GCTGAACACCACCAACGCCT	72	13
DTX2	GCCAGAGCCAGAGCCAGAGC	53	11
DTX2	AAGACACAAACCTCATCTGG	41	2
DTX3L	GGAGGCGAATTAACTCTCCT	90	776
DTX3L	GGTACCAGGAAAATGGGCAC	41	420
DTX3L	GCTCCTCTTTGACACGTTTC	130	362
DTX3L	TATGCAGTTCGCTGTATTCC	113	341
DTX3L	GAGTCTCAGATGTCATCACT	119	278
DTX3L	GTGGAGTTCAGTGAAAGGGC	78	107
DTX3L	CAGGAAGAACACCCAAACCC	81	86
DTX3L	GGAGTGCACGGTCAGCACCC	69	84
DTX3L	GATTTCACCTCAAGTCGATC	45	75
DTX3L	GTACACCCGCACGAGGAGCG	103	55
DTX3L	ACCTGTTCTCCAAAGAGCAG	89	54
DTX3L	AGAGGGTCATGAAACACCGA	84	44
DTX3L	TCAGAAAGGAAATCAGCCAG	66	22
DTX3L	CAGTATGTTCTAAAAGGAGG	50	18
DTX3L	GCAGCTTCTCCGCCACTCAA	45	7
DTX3L	TGTTGATGCATATCACCAGA	46	2
DTX4	TGACAGGACTGGACCCATTT	114	156
DTX4	GCAGCCCCGCTGCACTCATG	119	119
DTX4	GATGCTGTAGATGATCCGGA	98	59
DTX4	GGTGAGCCACCACATCGAGG	41	40
DTX4	GGATCCTCATGAGTGCAGCG	86	32
DTX4	GAACCAGTTCCGCCAAGACA	70	27
DTX4	GCCGTGGTCAATGGCAGCAC	96	27
DTX4	AAAGGCTCACCTGAATGCCG	18	23
DTX4	TCGTACCAACCTGCAGCGAC	79	16
DTX4	TGTGTTGGAAACCCCTGGGA	46	15
DTX4	TGGTACGATTCAAGGTGGCC	54	14
DTX4	GATGAGTGTTAAGGCAGCCG	52	10
DTX4	CGGCTTGTGTTGGAAACCCC	42	8
DTX4	GTCCCAGTGAAGAACCTAAA	44	8
DTX4	GACACACTGGGGACAGGAGC	43	6
DTX4	CCACACCACGCCCTTCCCAG	47	2
dummyguide	AACGCGAGTCCGGTGGCTAG	108	2613
dummyguide	GGATATTGAGTAAACCCGAT	79	2609
dummyguide	AACGCTGTCGTACGTGTATA	135	2382
dummyguide	TTTTACCTTGTTCACATGGA	76	2345
dummyguide	TAGTTCTAATCGTTCCTTGA	63	1601
dummyguide	CGGGACGTCGCGAAAATGTA	54	1540
dummyguide	TTCGGAACTTACTCAGGGTA	109	1475
dummyguide	GCGAACCCCGTAGCCAGGCT	94	1444
dummyguide	AAGCACTAGTCCGTATGATG	111	1376
dummyguide	ATTAGCACGGCGACCTTCTA	98	1349
dummyguide	TGTCCCTTGCAACCTCCGTT	160	1340
dummyguide	CCTCCGTGCTAACGCGGACG	156	1314
dummyguide	GCACGAGGTGAACAGCCGCT	100	1272
dummyguide	GATTGTGGTCGCTCAAAACC	55	1065
dummyguide	AGTAGACGGACGGTGAGCTG	132	1050
dummyguide	ACTACTCCGGCAAATACTCG	62	1011
dummyguide	ATATGACAGGGCAAACGCAT	23	987
dummyguide	CTCACGGGGACATACAGGGC	73	951
dummyguide	CGCTAGGTCCGGTAAGTGCG	121	940
dummyguide	CCGTCTCCGCATCGTCTTTT	159	921
dummyguide	GTGTATGATGCTTCGACTTA	108	813
dummyguide	AAGGCGCGCGAATGTGGCAG	117	775
dummyguide	TTGTCCGTGACCCTGATTAA	132	771
dummyguide	CATTGCACTCGTTGCCAACG	130	743
dummyguide	TAGTCCTTAGGGTGGGCTGA	95	734
dummyguide	CAACGACGGGCCTAGTCTCA	94	732
dummyguide	CCCAGGTGTATAATGAAACG	108	719
dummyguide	GGATTGAATGGCTAACGCGG	38	696
dummyguide	TTCCTAAGATTTTTAAGACT	47	694
dummyguide	AGTGTGGAAAAGCTAACAGA	66	648
dummyguide	TCGCGCTTGGGTTATACGCT	92	627
dummyguide	CGACAACGTGCAGGTGTATC	128	621
dummyguide	ATGTAACGAGTTGTAAGTCA	82	620
dummyguide	ATCTGTCCTAATTCGGATCG	148	610
dummyguide	CCAGTGCCCTTTTGTCGCAA	137	605
dummyguide	AACCACGGCATTGAGAGGTG	135	588
dummyguide	CCTCTGGAAGGACACTTCTG	122	585
dummyguide	AAGGGCGTGCCCTGCGTTGT	136	583
dummyguide	ACCCATATATGCTGCCGCAC	83	570
dummyguide	CTATCTCGAGTGGTAATGCG	100	546
dummyguide	CAACCGGCGGGCCCCTACAA	89	541
dummyguide	CGCACGACCATTGCTGCTGC	89	528
dummyguide	GAGGGGGCTTCAAACATGTG	87	509
dummyguide	GTACCATACCGCGTACCCTT	133	507
dummyguide	ATCCATGTGGTTACAATATT	114	506
dummyguide	ACAAACGACCTTGAGCAGGG	75	504
dummyguide	CTCGGGACTAACGTGAGAGC	96	497
dummyguide	ACTAGGGCAGTGTGTCTGCA	121	488
dummyguide	ACTTCAGTTCGGCGTAGTCA	122	483
dummyguide	GAGAAGGATGGAAATTAGAA	33	479
dummyguide	CAAGTGAGCATAAGCGATGT	93	460
dummyguide	ATTTCCCTACGGAGATATCC	47	456
dummyguide	TGCGCCTTACTCGTTAACTG	96	447
dummyguide	GGCTCTGGGGCTCACGGACG	100	445
dummyguide	GACAGTGAAATTAGCTCCCA	86	426
dummyguide	AGTGAGTGACAACCAGATCG	59	425
dummyguide	AGGAGTGTTATGAAAAGGCT	79	425
dummyguide	CCTAACCCCTGGCCAGGAAG	106	421
dummyguide	ATCTTCAGGGTAACTACGAA	47	420
dummyguide	ATCACGTGATCGGATGGTTC	114	419
dummyguide	AGCTCCATCGCCGCGATAAT	89	412
dummyguide	CGTCCAGAAGAACGGCCCCT	120	412
dummyguide	GGAATCCGGAGCTCATGAGG	66	410
dummyguide	GTGCGACGAATTGTCCTGAG	116	409
dummyguide	CTCCCAGTACCAGTCAGTTC	64	408
dummyguide	TACCCTCCGGATACGGACTG	94	404
dummyguide	TAGCTCGAGTCATTTCTCTA	69	404
dummyguide	GTAGACGTCGTGAGCTTCAC	99	399
dummyguide	ATACCAGATGCGTCCGCTTG	113	399
dummyguide	TTGCGTCAGCGCTGCACATC	122	394
dummyguide	GGAATGTCCTAGGTTACTGA	54	392
dummyguide	AAGAATTAGGCACGGTTACT	134	391
dummyguide	GACTTTGGTTGAGCTTCAAT	52	389
dummyguide	GGCCACAAAAACTCGCTAAG	37	387
dummyguide	ATAAGCTACTCTGAGTTCCT	77	386
dummyguide	TAGACAACCGCGGAGAATGC	99	383
dummyguide	ACTGCGGAGCGCCCAATATC	125	379
dummyguide	ACGTTCGAGTACGACCAGCT	115	377
dummyguide	TTAACTCGAACGCTCGAAAG	60	375
dummyguide	CATAGGTCCCTAGCAACTCC	75	357
dummyguide	GAGTACAGCGATTCCTCATG	117	351
dummyguide	TTGGATATTAATTAGACATG	73	342
dummyguide	CAGTCGTTTCTATGGGATCT	122	336
dummyguide	CTGCGTGTCTTGCTCGCATG	110	335
dummyguide	TACATGGTATAGTGTTTATT	100	333
dummyguide	GGATACCTGGGCCGACTTTC	102	332
dummyguide	TTTTGACTCTAATCACCGGT	109	331
dummyguide	CATCTGTAGGGTTGCAAGCC	59	327
dummyguide	CGCTAAATTGTCACACGTTT	64	323
dummyguide	ACGTCCATACTGTCGGCTAC	139	321
dummyguide	ACGCTCAGCACCCGCTATGC	121	317
dummyguide	AACTAGCCCGAGCAGCTTCG	156	315
dummyguide	TCACTTGTCTATACGGGGTA	113	315
dummyguide	CTGGCCGAATCTCACTATGT	76	314
dummyguide	ACTACTGGCTATCCGCGCCA	87	312
dummyguide	ATAGGTCATCCACTGGGCGG	101	309
dummyguide	AAGAGCGAATCGATTTCGTG	89	308
dummyguide	AGCTGGACTCTGTAGAAATC	141	308
dummyguide	TTCGTGGTAGGTATAACTAT	115	306
dummyguide	ACAGCGCTCTCGTGTACTAT	123	303
dummyguide	CTAAGTTTGTTAATGGGCCA	89	301
dummyguide	GGCGTCAAAATTAGAAGCCG	75	297
dummyguide	TCCCCGAGACCATCTTAGGG	82	294
dummyguide	AGAAGAAAAAAATGTCTACG	52	291
dummyguide	TCGAGATGCGCAGCAGATGA	94	289
dummyguide	AGGACACAGGATACGCAGCT	58	287
dummyguide	GTGAAACAGAGGGTCCATCA	62	286
dummyguide	CACTTACACATGAGGCGGTA	83	285
dummyguide	ATTCAGCGCGCTCGCCCTGG	112	281
dummyguide	TTCAGCGAGTGTGACTAAGC	79	279
dummyguide	GTGTATGAATGTTAATTCCG	75	279
dummyguide	AAGGACTGGAATATGGAGAG	59	272
dummyguide	TTGTACGGTACTGGCTTTGT	111	269
dummyguide	ATTTTCGAAAGCTTAGGCCA	79	267
dummyguide	AGCGCAGATAGCGCGTATCA	82	263
dummyguide	CGGCTGAGGCACCTGGTTTA	81	262
dummyguide	CCTACGCGGTAGGGAACTTT	117	260
dummyguide	CGTCCCTTCGTCTCTGCTTA	158	256
dummyguide	GTTCGCTTCGTAACGAGGAA	123	255
dummyguide	GACTGAAATCCAAGGACTGT	71	253
dummyguide	TCGATGTAGCCCCGCCCAAG	71	247
dummyguide	AGTGGGGCGCTAAGTGGGGG	56	247
dummyguide	CGCCTCTCACGTGTAGGCTT	101	244
dummyguide	TCGGCTACAATCTTTGGCAT	125	244
dummyguide	TTCAATCACCTCACGGTAAG	128	240
dummyguide	CCGGGAGATTAACGTTAATT	89	238
dummyguide	CGGTGCTGTGAAAGCCGAGC	85	237
dummyguide	TGTGAAAGTTTATGGTGTTA	87	237
dummyguide	CGTGCGGTAAATACGAAATA	68	233
dummyguide	GACGCCTTGCCCGGCTCACA	157	232
dummyguide	TAATGCTGCACACGCCGAAT	78	230
dummyguide	ATCTACAATCCAGCCCTCTA	35	230
dummyguide	CATTGCACGCCACAGCATTG	89	228
dummyguide	GAGAAGTGGGGAGCCATTGG	66	228
dummyguide	AAAATCGATGGGCTGAATCT	95	226
dummyguide	GGAGTGGTCCCGTACGCAAC	84	223
dummyguide	CAGTAGCGATCGAATGTCAA	104	223
dummyguide	GCTTGCTATATGGGTGCGAG	96	223
dummyguide	GATATGGCTCGAGTAATCTT	92	223
dummyguide	CATCATAAATGTACAACGGG	50	222
dummyguide	GCCCCTTATGATTGTTATAG	72	221
dummyguide	CACATGGGGTACAGCACACC	127	220
dummyguide	AGATGGTCAGATCTAGTAGT	71	220
dummyguide	TGCATGCCGAGCATTTTCAA	47	219
dummyguide	ATCGTTTCCGCTTAACGGCG	155	217
dummyguide	GCAATGCAATCGCAGGAGCA	121	216
dummyguide	CGATGCCCGTCTATGGCCCG	127	213
dummyguide	GGGATGCGTCTTGCTAAACC	49	211
dummyguide	GGTCTCACCTGCACCCCGAA	83	211
dummyguide	GCCTGCCCTAAACCCCGGAA	106	207
dummyguide	AAAACAGGACGATGTGCGGC	79	205
dummyguide	CATGGCCTACGGTGTCTTTG	169	204
dummyguide	GGACCAACTCCCCTGCCCAC	111	200
dummyguide	TACCCTGGATTGTCCTTGCG	64	199
dummyguide	TACCCACGCGTATTCCATCT	125	196
dummyguide	AGAAACTGAACTATCCTACT	56	196
dummyguide	ATTCCTTCGGCGCTCTGCGT	118	195
dummyguide	GCCTGGGTTTTGGTGCATAC	87	192
dummyguide	CGATGGATCCCTAGTTCCTG	132	191
dummyguide	AAACCTAGCCCCAATACTTA	46	190
dummyguide	TTTCCCATGATCATTTAGTG	68	186
dummyguide	TACGCTTGCGTTTAGCGTCC	102	185
dummyguide	TTGCAATGCTGCTATAGAAG	78	184
dummyguide	GTAAATTAATGTAACTACCG	79	184
dummyguide	CTTTGATAACGTGGGCGGTA	84	183
dummyguide	CGAGTGTTATACGCACCGTT	113	181
dummyguide	ATTGAGAATTCGTTTCAAGG	59	176
dummyguide	CCAGAGCCTTGGTTTATATC	76	174
dummyguide	TAGAATTTGACCAAAGGCAC	81	172
dummyguide	ATGCAAGACAGCCTCCCAGC	107	170
dummyguide	GCACGCTGTACAGACGACAA	111	169
dummyguide	CCGTTGGACTATGGCGGGTC	137	168
dummyguide	GCAGTACTACTGAGTTTTTC	93	168
dummyguide	TGTCTTCGGATAGGCGGCTT	74	167
dummyguide	GGGGCAGGGACCGAGTATCC	68	166
dummyguide	TCCCGGTTGGTGAACGATAC	85	165
dummyguide	GGATTTGTCGCTTGCCACAC	85	165
dummyguide	TGCCCACTTAGCAACACTCT	100	164
dummyguide	ACGGTTATGGTCTCATGGGG	72	163
dummyguide	ATGCGCAGCTCCAGAATTTT	107	163
dummyguide	GTTAGGAATAAAAGCTTTGA	49	162
dummyguide	CGCCCGTTTATGTGGCTACC	103	161
dummyguide	CCAGTTGCTCTGGGGGAACA	96	161
dummyguide	TTCTTCGGCCTACACCCGGT	120	160
dummyguide	GCCTAGTCTCGGTAAGAGTG	98	156
dummyguide	TAGTGGGAATGGTCGCGTAG	73	155
dummyguide	CCCGTGGCGTGCGCACCTGT	92	155
dummyguide	GTAGGCGCGCCGCTCTCTAC	121	154
dummyguide	CTCCCATTGATCTACGATGG	100	152
dummyguide	AGACTCGTATTGTCATATTA	57	152
dummyguide	CATGAGCGCATTGAATAATA	24	151
dummyguide	AGCACGTAATGTCCGTGGAT	106	148
dummyguide	GGAGAGGGCCCGCGAACTCA	102	148
dummyguide	TTCACGTCGTCTCGCGACCA	138	147
dummyguide	TGCTACCTTCGGGACCACCA	98	147
dummyguide	TCGCAAGGAAGCCAGCTAAG	84	147
dummyguide	GCTAGTTTCTGTTAGCTCCT	69	147
dummyguide	AGCTCGCCATGTCGGTTCTC	143	145
dummyguide	TGCAGTCGCGCTGAGCGTCA	95	145
dummyguide	CGCGTGCATCTGCCGAAGGC	107	145
dummyguide	GCCCAGACGCCCTAGAATAG	104	145
dummyguide	CGACGCTAGGTAACGTAGAG	106	143
dummyguide	CTCAACCGACCGTATGGTCA	113	142
dummyguide	GAGTGTAAGCTAACACTCTG	103	140
dummyguide	TCCGGAGGCTCAAACCAAGT	65	139
dummyguide	GGGCCTACGATCAGAGGTGT	118	138
dummyguide	TCTAAAGCCGTCCTGATGTT	139	138
dummyguide	ATACGGCCGAAGCCCCTTCA	97	137
dummyguide	CACTGCAGTATTCGTGGCCT	61	137
dummyguide	GGCGTTAATTAAACTGTTTT	59	137
dummyguide	TCCTGCCAAGAAACACCCTT	120	137
dummyguide	GAGTTATTTATTCTCTCGAG	51	136
dummyguide	GTGATAATGATGTATTCTCG	91	136
dummyguide	CGCGGCCCACGCGTCATCGC	107	134
dummyguide	TTATGTGAGCACGCCATTAC	94	133
dummyguide	ATGCCTTAGACTTAACCTCG	110	133
dummyguide	CAAAAGTCTCGCTTGGTCCT	133	132
dummyguide	CACATAACATGAGGTATCAG	57	132
dummyguide	TCCTGGATACCGCGTGGTTA	69	131
dummyguide	ATTTATAAACACAGGGTCGC	44	131
dummyguide	CTAACATGAGTACATAGATA	60	129
dummyguide	AGAAGACCGAGGCGCTTCAA	88	128
dummyguide	ACTGCTCCCGGTCGCCCCTC	143	128
dummyguide	AGATTCATTCACGAGTTGGG	99	128
dummyguide	GTTGATCGAAAATGGGAGAA	65	128
dummyguide	CAGCCTATTTTGCTACCTAC	52	127
dummyguide	GGTGCGGTCTGCTTGTAGAT	128	126
dummyguide	CTCATGAGTCGTTTCTTTCA	111	125
dummyguide	TCTGGCTTGACACGACCGTT	95	124
dummyguide	GCAAAAACCCAACGCTATTC	62	124
dummyguide	AGGGAAACCTCTATGGGTAA	75	123
dummyguide	CAAATGCCATTTAGGTTATC	104	123
dummyguide	TCGAGAGGAAAAACACACTG	42	123
dummyguide	AGAACCCAGACGCCAGCGGT	136	122
dummyguide	GGGACTGTAGGAACATCCGC	62	122
dummyguide	CCAGAAAGCCTCTCCATTAC	110	122
dummyguide	GCCGTGGTATCAAGTCGGTA	99	121
dummyguide	GTGCGCATGGGCTGATGTTA	126	121
dummyguide	AGTATGAGACTCATAGGGTG	78	120
dummyguide	GCGGTTCCGGGAGCACATTT	113	119
dummyguide	CTATATTGTCGCGCAGTGGA	99	119
dummyguide	AAATGCACAGATCGCTGATC	97	119
dummyguide	ATAGCGGATGTCCTTGGAAA	126	119
dummyguide	CCTCTCCCAATCTACAGCTC	54	119
dummyguide	GTAAGGCCCGCGTACGAGCT	82	117
dummyguide	TTCCACGGTAAAATCGGTCA	114	117
dummyguide	GGCGCATTAAAGTCGAGAGC	49	116
dummyguide	TGAGCGGCCTCTAATTAATC	69	116
dummyguide	CCTCGATGGTCACCTGTAGC	84	116
dummyguide	TTTTTCTCACCCGATGAATC	75	116
dummyguide	ATCAGCCCATTTCTGCGCAC	43	116
dummyguide	GACGCCCTAATGCCCATCGT	109	115
dummyguide	ACGGTGGGGATGGACCTACT	114	115
dummyguide	GTTTAAAGAAAGGGGCTAAG	32	114
dummyguide	ACGGAAAGACCTCGCTATTC	79	112
dummyguide	AGAGCATGATGACCCGTGAC	119	112
dummyguide	CTGAGTGAAAAATAAAAGTT	50	112
dummyguide	CGTGTTTGGAATTTGCCGCG	92	111
dummyguide	CGACTGACCCCTGGGTGAAG	107	111
dummyguide	TTGGCCTGGAATTTAGGATC	78	111
dummyguide	GAACGTAGAAATTCCCATTT	126	110
dummyguide	CCAGCAATACCCCGGTATGG	94	109
dummyguide	ATCAAAGTGTCTGACTTATT	102	109
dummyguide	CTTCCGTTATTCGGAAGTGA	99	108
dummyguide	TGTCTTTAAACACGCCATCG	71	108
dummyguide	CTTAAGCTTATCAACATCCG	92	108
dummyguide	CTCCCTGCCGGCCGGGTTAG	145	108
dummyguide	TGTTTTGCATGTTGCATAGG	107	108
dummyguide	ATAGTAACGTCAGGGAGTAA	85	107
dummyguide	GAGCAATCCAAAGTTAACGG	60	107
dummyguide	GCGTGCGTCCCGGGTTACCC	115	106
dummyguide	CAGTGTCCGAGCGATATTTT	110	106
dummyguide	TCTACCTATTGTGGAATTTG	99	106
dummyguide	GTACCCCTATGGCCGTTCTA	87	105
dummyguide	TGCGGGGAGCTCTCTTAATG	74	105
dummyguide	GCCCCGTAAATCTCATTACA	34	105
dummyguide	GCCCCGCCGCCCTCCCCTCC	147	105
dummyguide	CGAATCGGAACTTTGTACCG	120	104
dummyguide	GCCAGGGTTCTTGGTCCCGA	78	104
dummyguide	CGAAACCTCCTAACTGAGAG	103	104
dummyguide	GTTCATTTCCAAGTCCGCTG	59	104
dummyguide	TCCCTGCATTCATGGTTTTA	122	103
dummyguide	ACGCATGCTTCCCAAAGCGT	112	102
dummyguide	CCACGATGCCACCTCATCCC	82	102
dummyguide	TGGGAATTCCTCGGCCGATT	112	101
dummyguide	AATCTTACTCGTCCTCCTTG	138	101
dummyguide	AAGTGACGGTGTCATGCGGG	92	101
dummyguide	GGTCACCGATCGAGAGCTAG	116	100
dummyguide	GGTCGCCTGTGCGACATGCT	93	100
dummyguide	GACCGCAAAGTGGTCCGAAG	104	100
dummyguide	TGTGTTAGCCGAGATCTCTG	115	99
dummyguide	TCTATTTTGTCTGCGCAGAA	45	99
dummyguide	TCCAGCGCGAGCTTACTCGT	107	98
dummyguide	GGGACTGATATATGGCGAAC	55	98
dummyguide	CCCGCTAACAGCCTAGATCA	93	98
dummyguide	GTCGCTGCGCCAGTGAGAAC	69	97
dummyguide	GGTGCTTAGCTCTGCGCACA	120	97
dummyguide	TAAACCCTTGGCGCCCTCAC	112	95
dummyguide	ACGCTGACGAGTAAAAGCGG	74	94
dummyguide	TCCCAAGGGTTTAAGTCGGG	71	93
dummyguide	ATCTCTATACTGTCACTCGC	41	93
dummyguide	TCATCTTACATCTGGGAGAC	94	93
dummyguide	TCGCGGACATAGGGCTCTAA	69	92
dummyguide	GGGCGTGTATGTTCGTATTG	87	92
dummyguide	CGGAGTTAACCTGGAACCTT	84	92
dummyguide	TATAACGGTAATGGGATTCC	84	92
dummyguide	GCAAACCCGAGTGACACGTC	115	91
dummyguide	GTTACGTACCCTCCAACTTC	79	90
dummyguide	GAGACCACTTTCGTGCAAGC	95	90
dummyguide	CCCTCAGGAGCTACTAAGGT	116	90
dummyguide	CAGAGACAATGACATGTAGA	78	90
dummyguide	TGGTTCCGTAGGTCGGTATA	92	89
dummyguide	CCAATCTTGAACGTCATGTT	120	89
dummyguide	ATCTCGGGTCGACTGCGGAT	83	88
dummyguide	CCCTACCTATCCGGTGCTTT	173	88
dummyguide	GAGTCGAAGATGGTCTAGGA	47	88
dummyguide	CCTAGAGGTCCCAAGGCGTG	139	88
dummyguide	ATGCGAAACGACATTTATTA	67	88
dummyguide	GGTGTCACCACCGCTTACCA	85	87
dummyguide	ACCCTCCGAATCGTAACGGA	99	86
dummyguide	ACGTGGGGACATATACGTGT	59	86
dummyguide	AAAAAGCTTCCGCCTGATGG	97	86
dummyguide	TCCCTCCTAGTCAAGAAGAG	85	86
dummyguide	CTTCTAGCTGGTTCATTGCT	106	86
dummyguide	TAGATCGAGTTTATTTTCCT	88	86
dummyguide	CGGCCGCATCCTGTTATATT	121	85
[truncated: 9,110 more rows]
