# Supplementary figures and images for: Negative regulation of autophagy by UBA6-BIRC6–mediated ubiquitination of LC3
Source: eLife journal article supplement (doi:10.7554/elife.50034), 2019-11-06

Figure 1-figure supplement 1

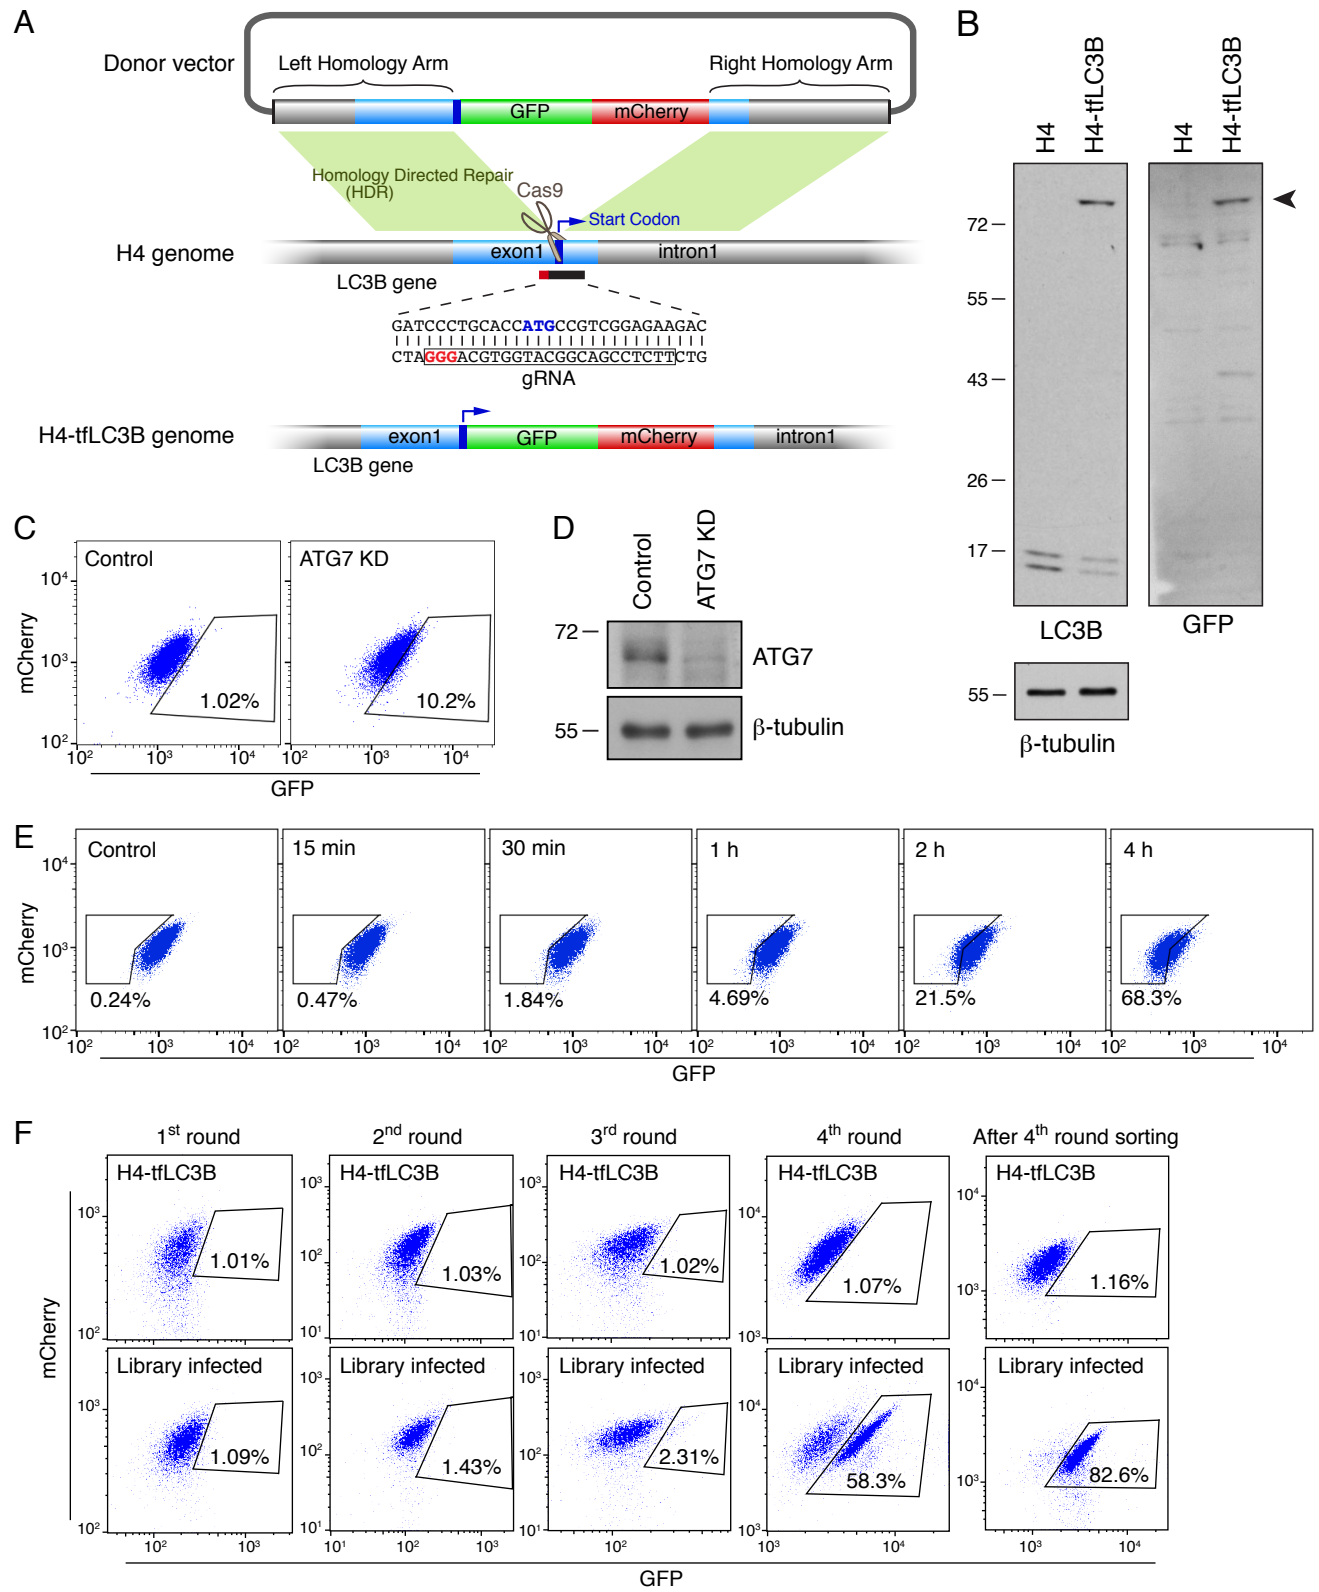

Supplement: supp [file elife_poa_e50034_Figure_1_figure_supplement_1.pdf › elife_poa_e50034_Figure_1_figure_supplement_1.pdf]

Figure 2-figure supplement 1

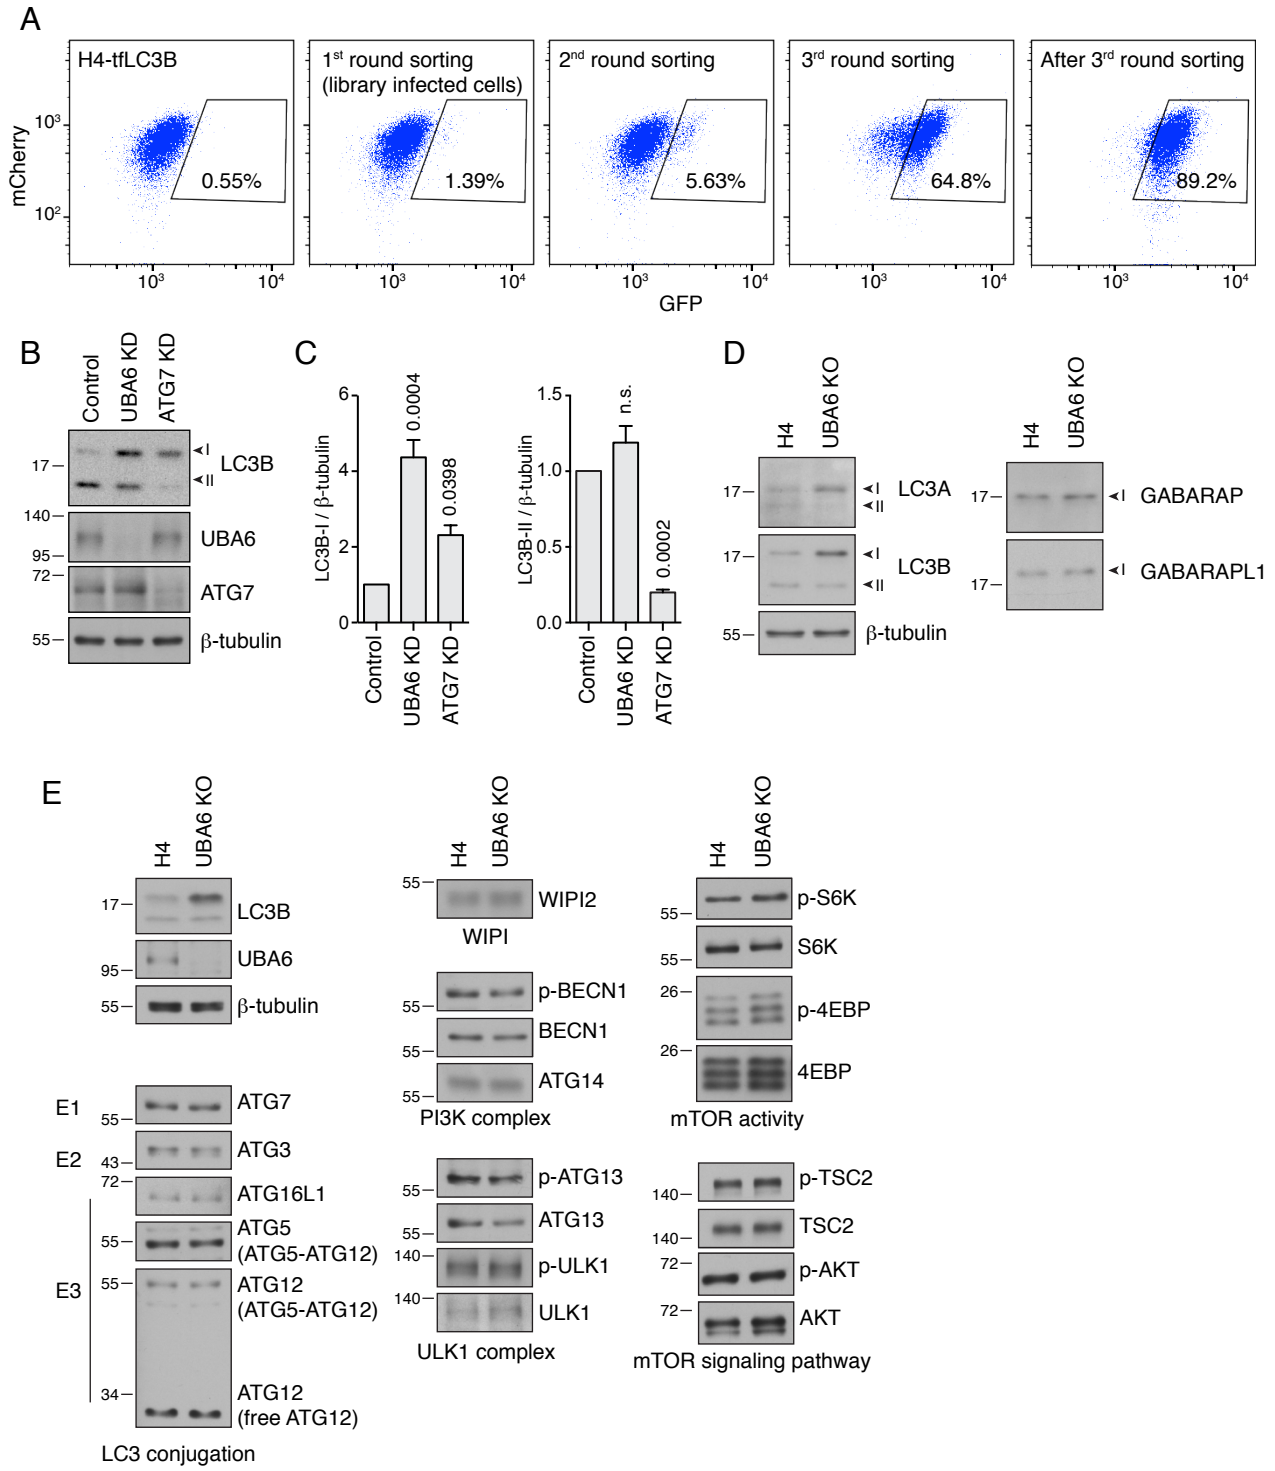

Supplement: supp [file elife_poa_e50034_Figure_2_figure_supplement_1.pdf › elife_poa_e50034_Figure_2_figure_supplement_1.pdf]

Figure 2-figure supplement 2

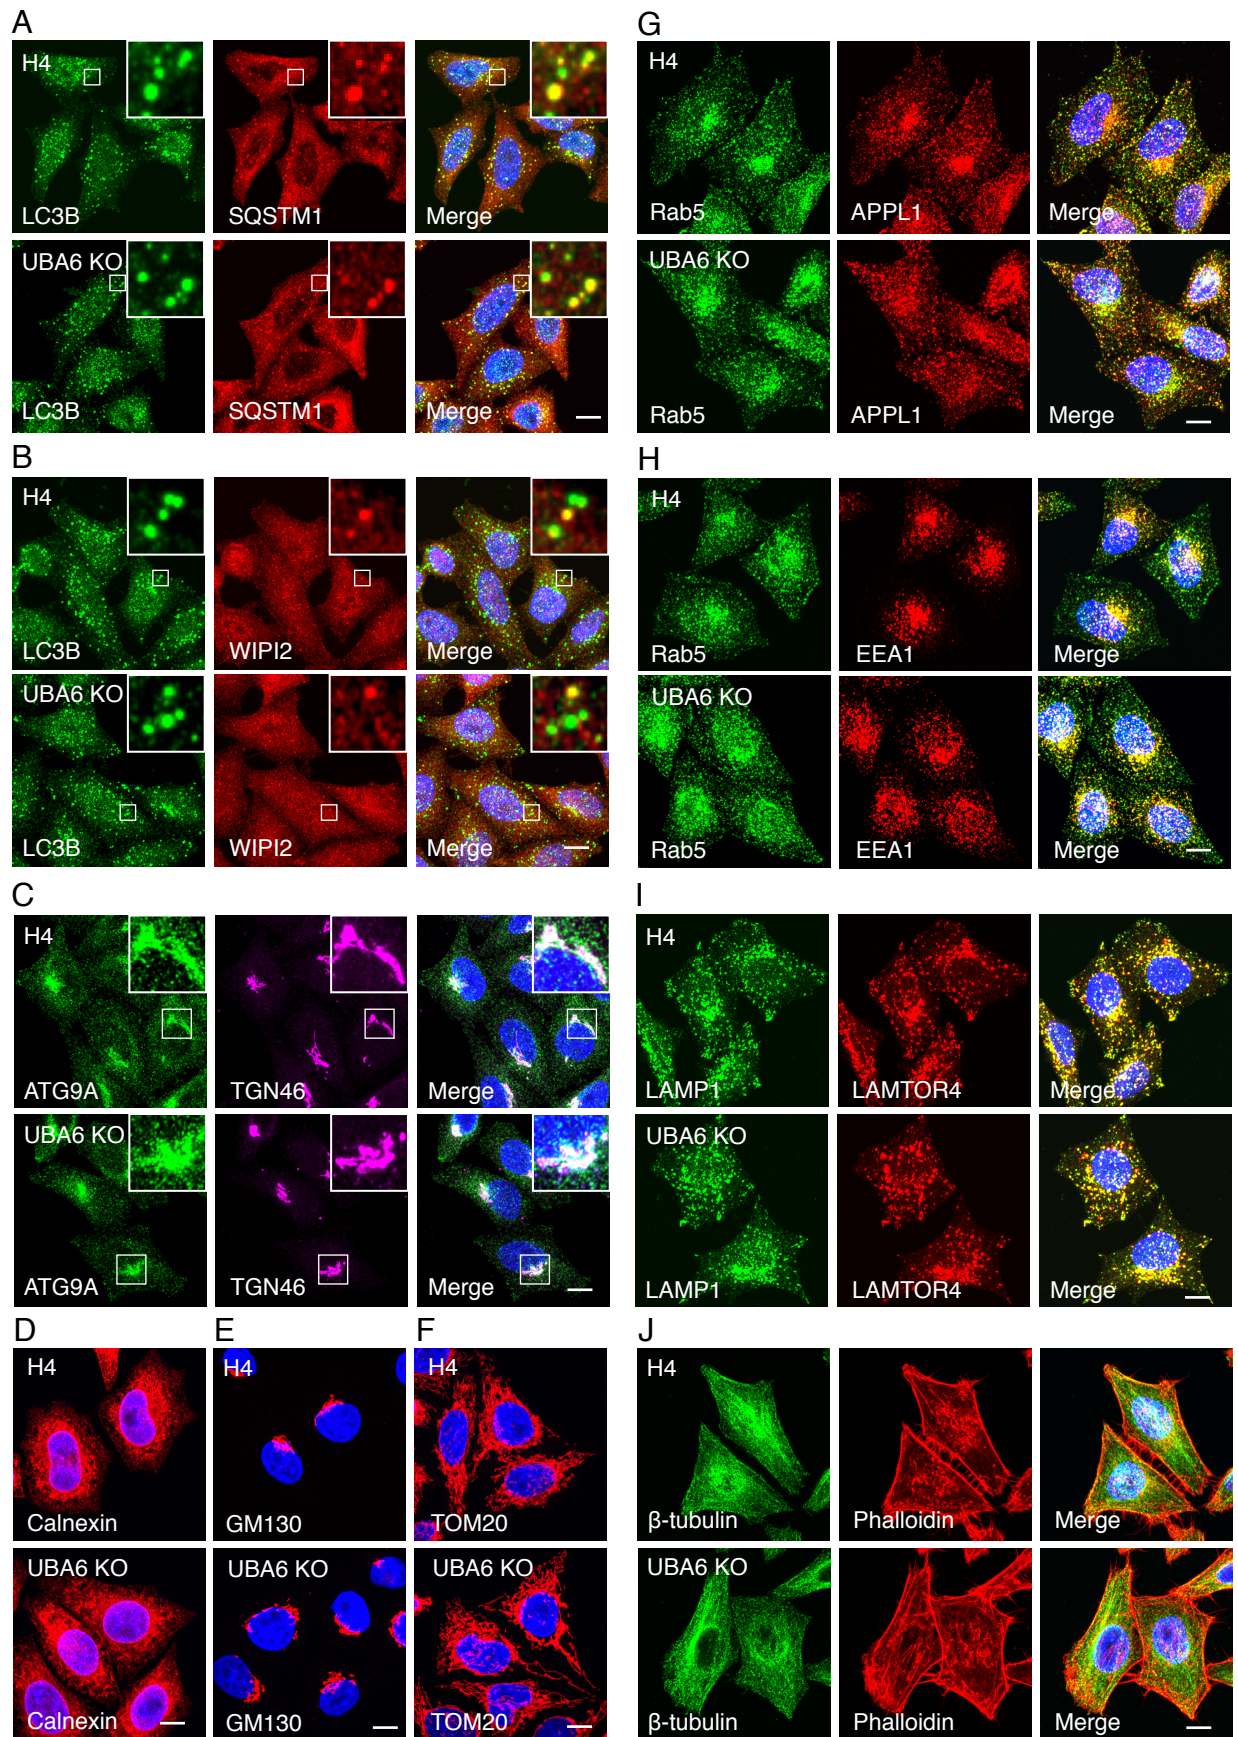

Supplement: supp [file elife_poa_e50034_Figure_2_figure_supplement_2.pdf › elife_poa_e50034_Figure_2_figure_supplement_2.pdf]

Figure 2-figure supplement 3

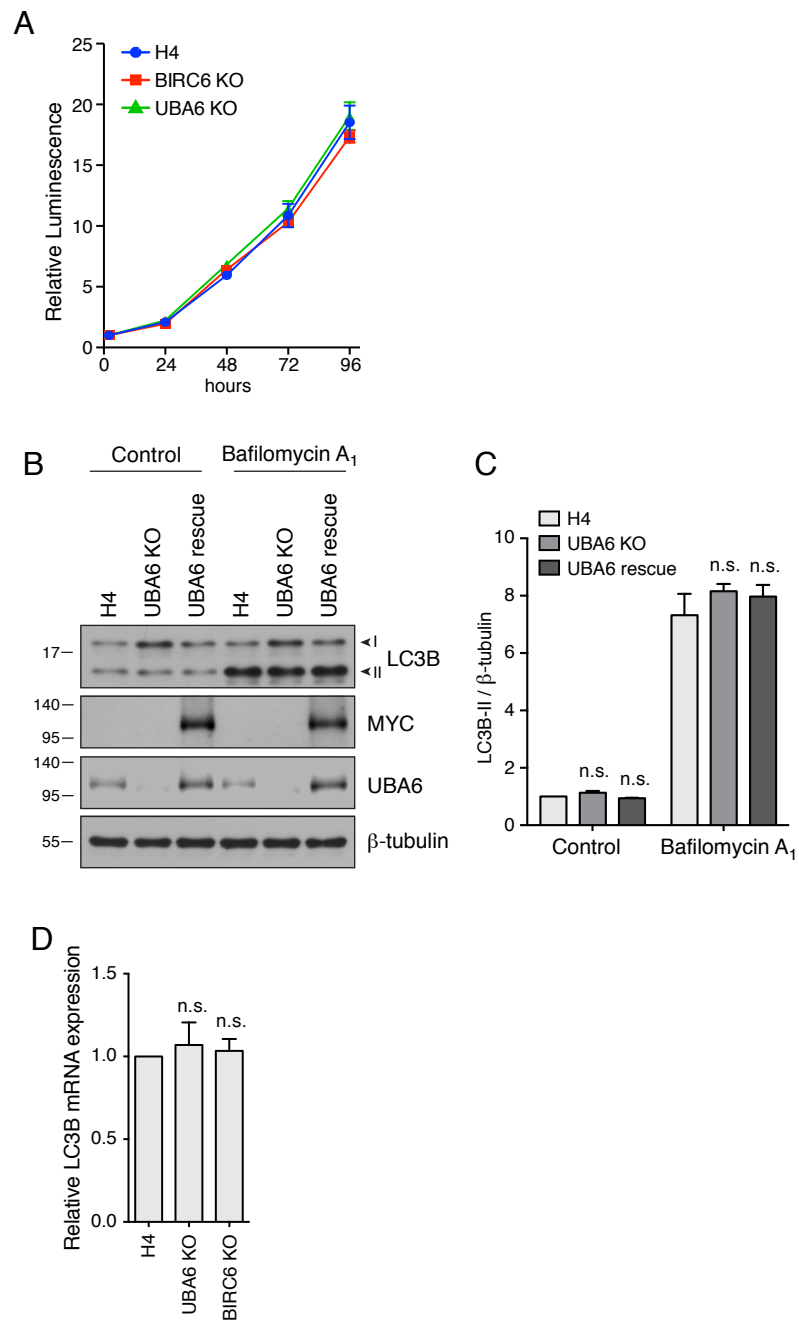

Supplement: supp [file elife_poa_e50034_Figure_2_figure_supplement_3.pdf › elife_poa_e50034_Figure_2_figure_supplement_3.pdf]

Figure 5-figure supplement 1

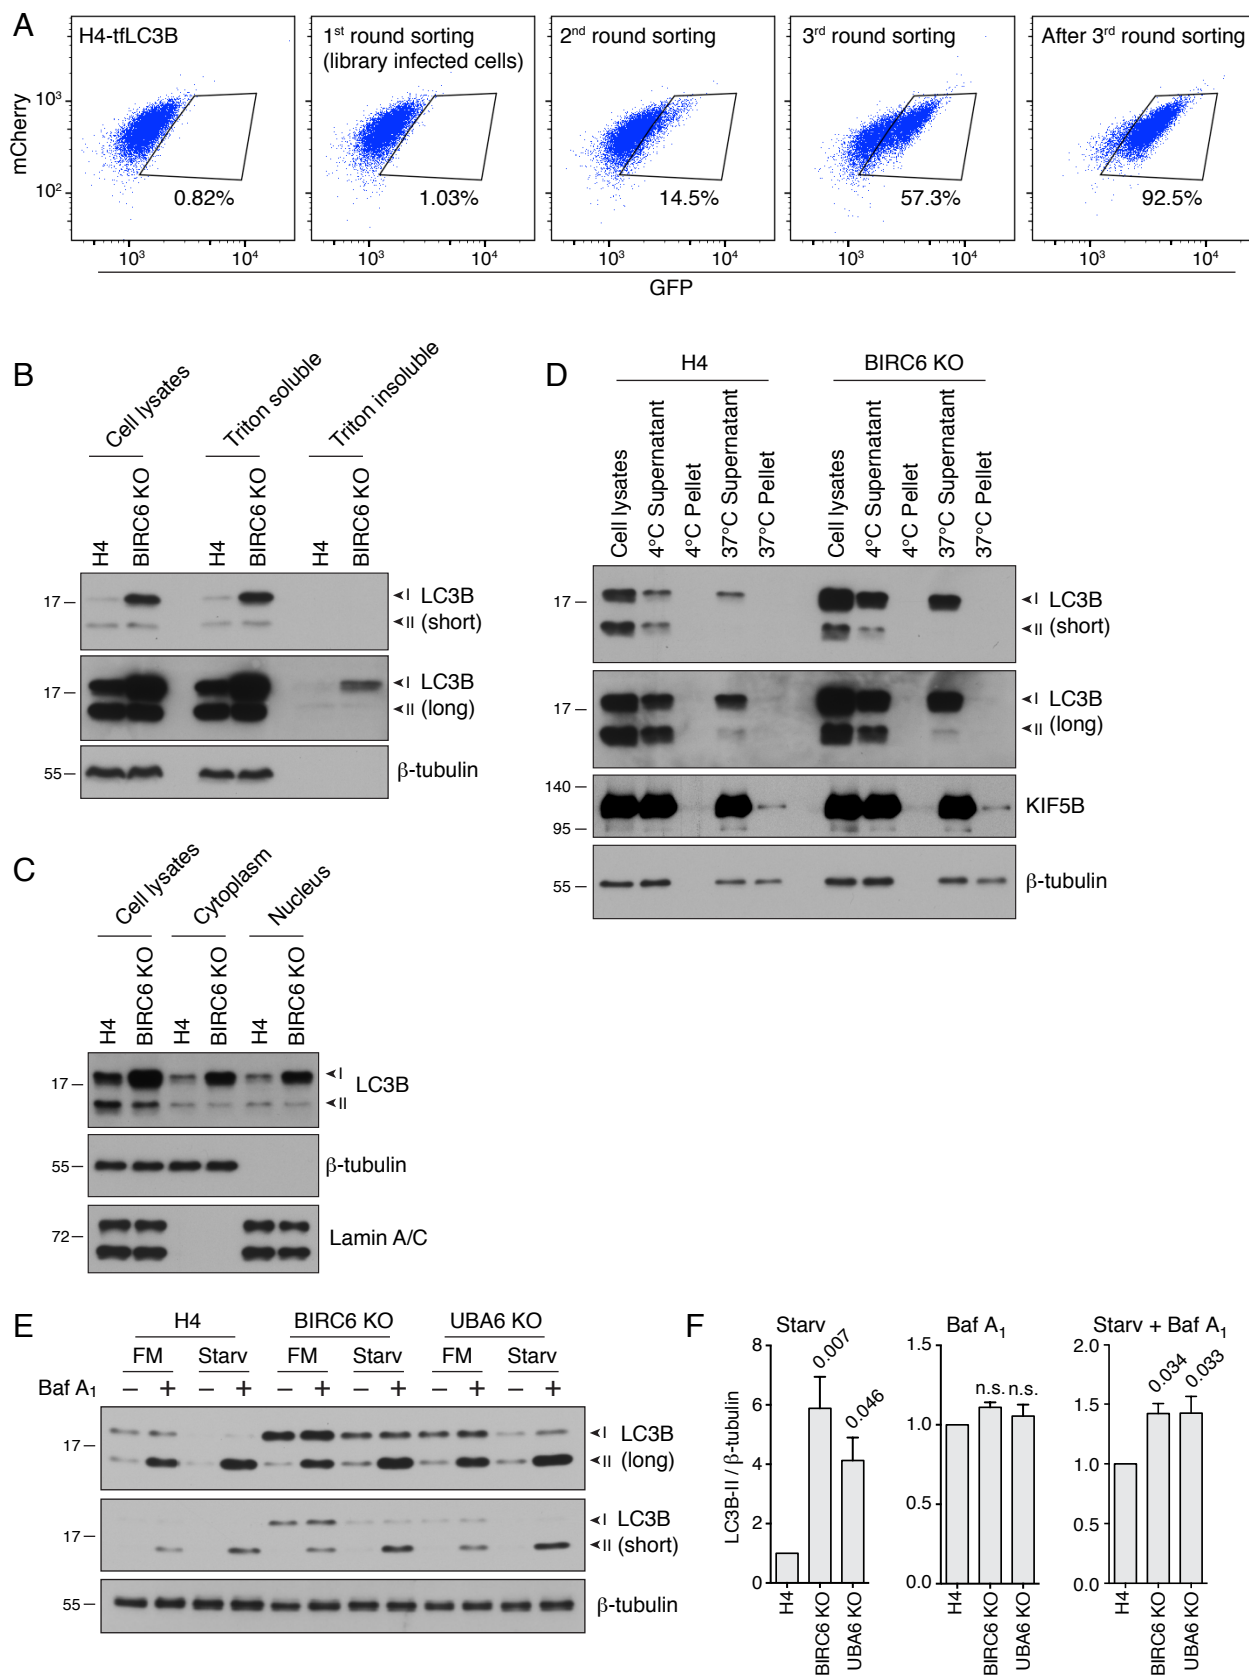

Supplement: supp [file elife_poa_e50034_Figure_5_figure_supplement_1.pdf › elife_poa_e50034_Figure_5_figure_supplement_1.pdf]

Figure 6-figure supplement 1

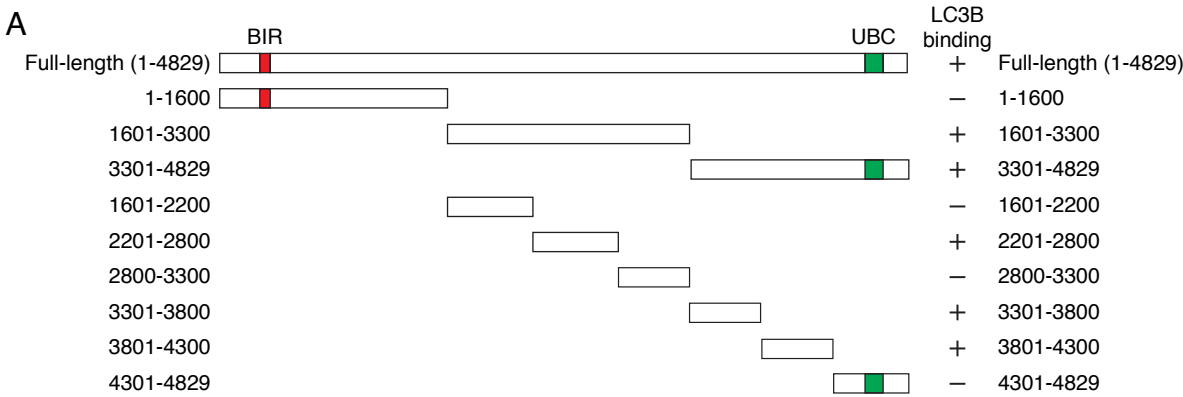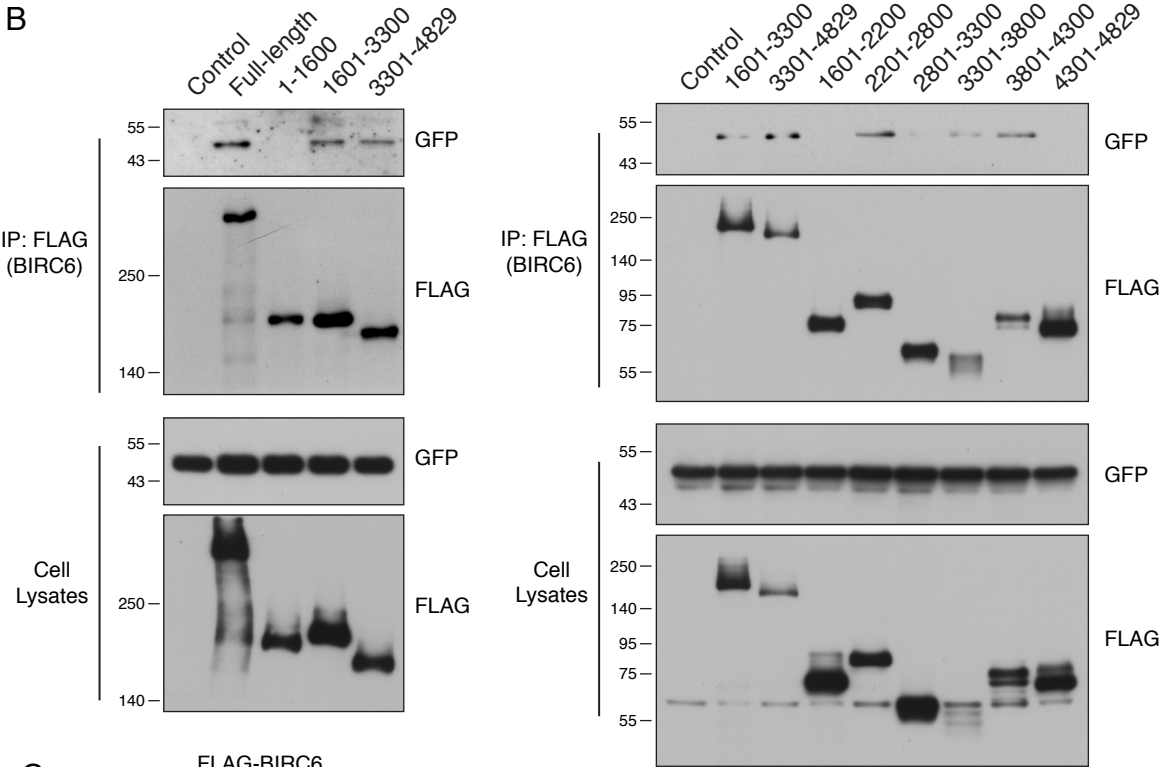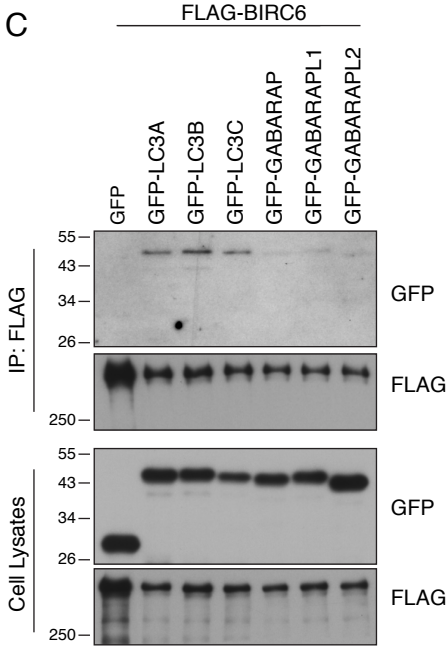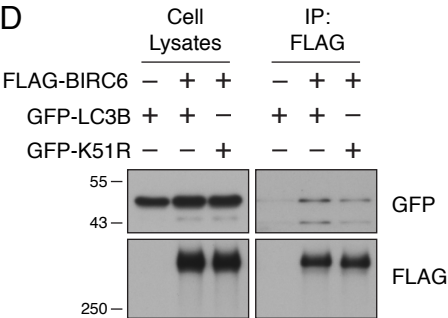

Supplement: supp [file elife_poa_e50034_Figure_6_figure_supplement_1.pdf › elife_poa_e50034_Figure_6_figure_supplement_1.pdf]

Figure 7-figure supplement 1

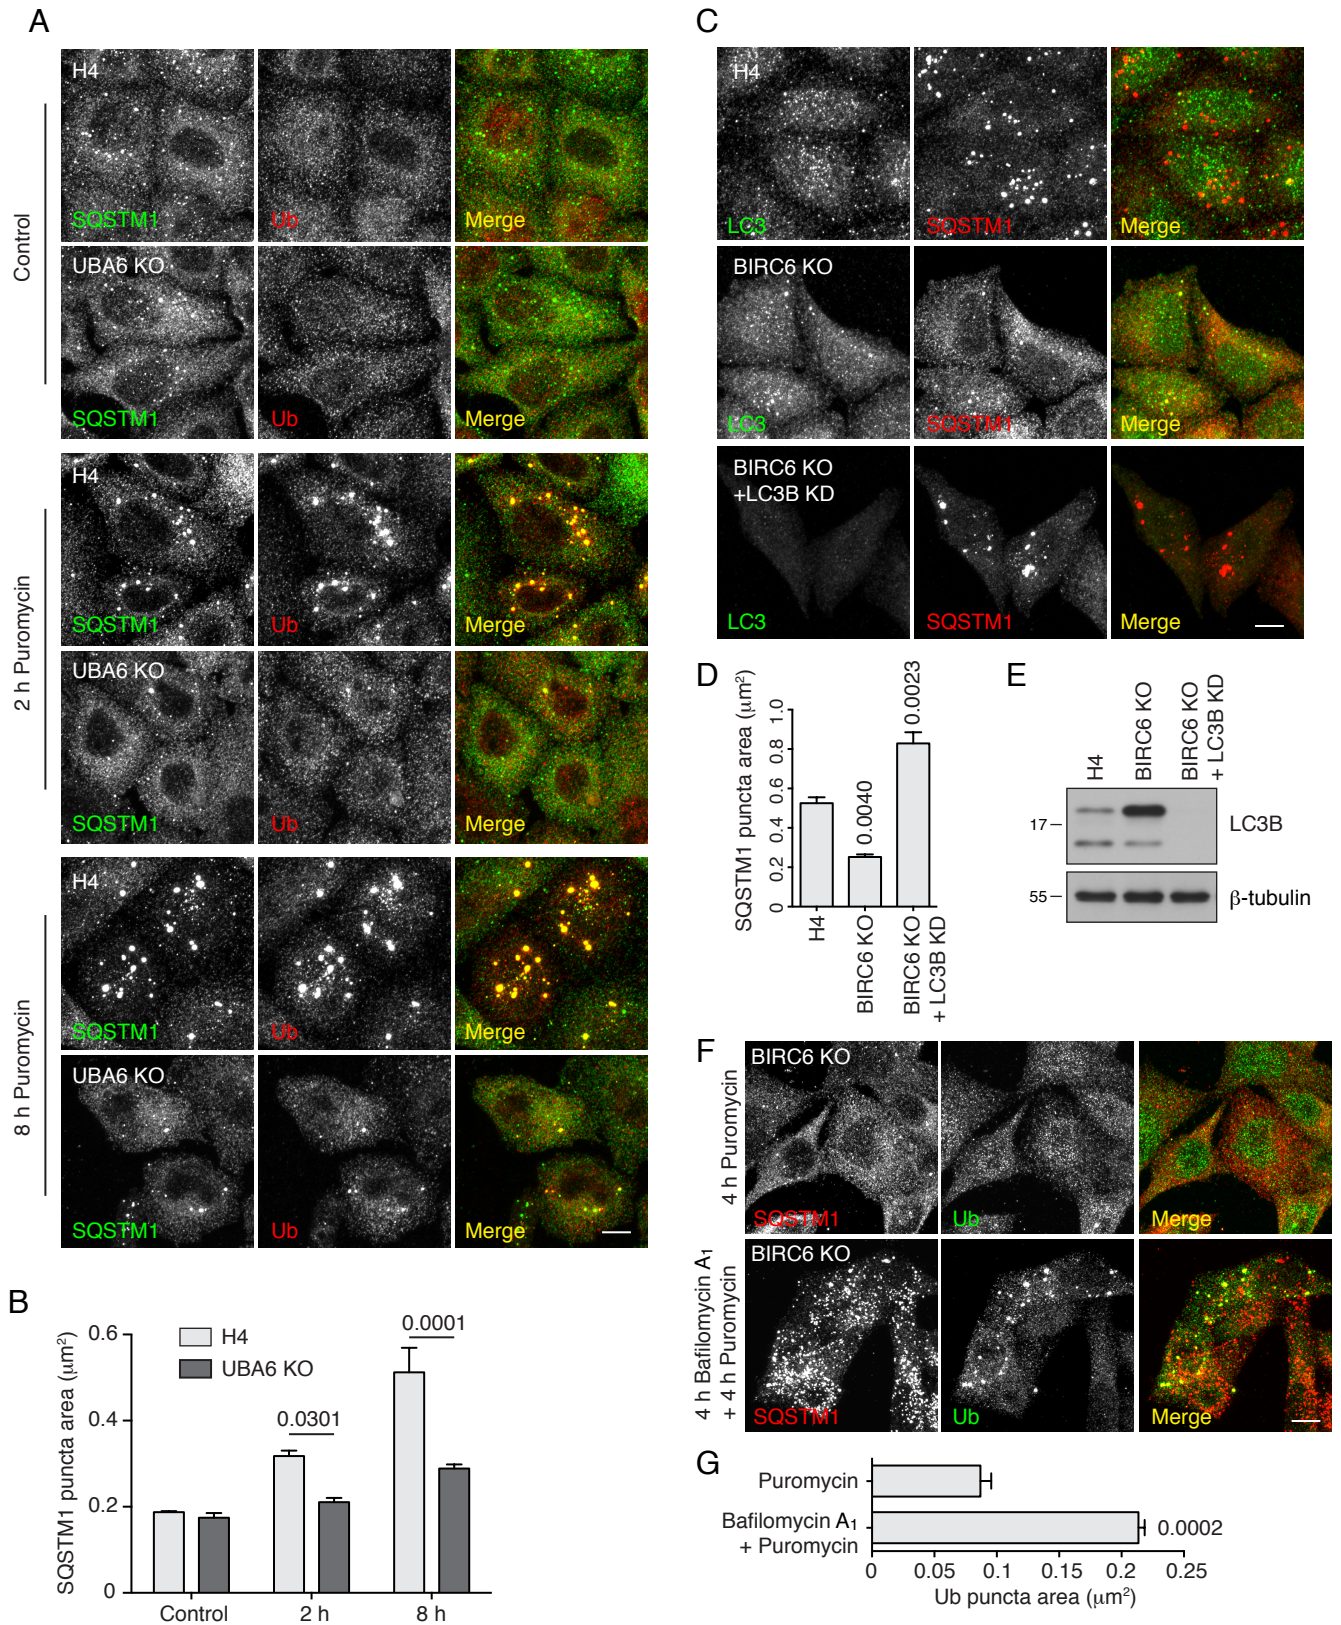

Supplement: supp [file elife_poa_e50034_Figure_7_figure_supplement_1.pdf › elife_poa_e50034_Figure_7_figure_supplement_1.pdf]

Figure 7-figure supplement 2

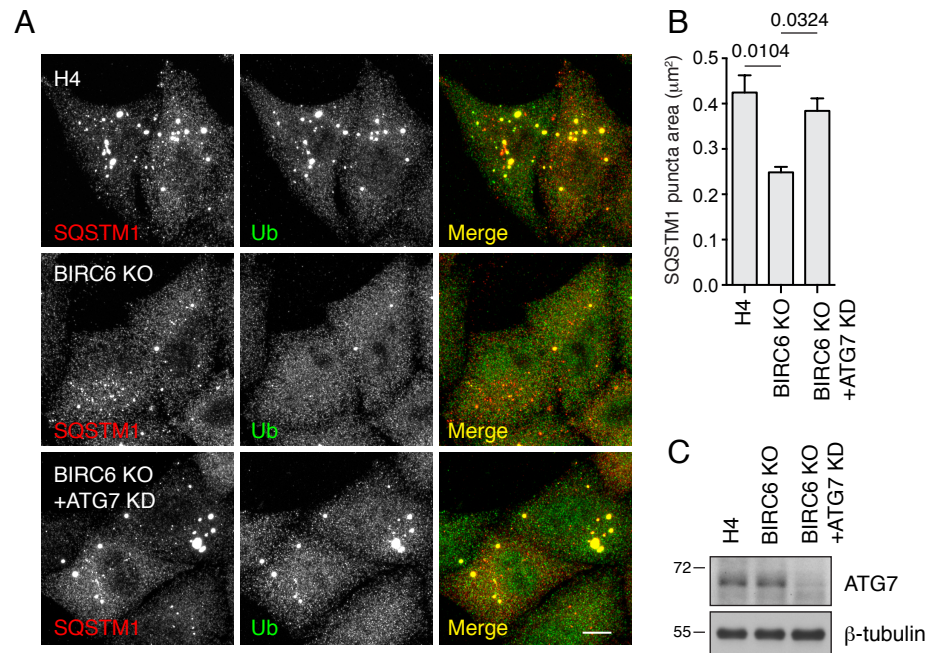

Supplement: supp [file elife_poa_e50034_Figure_7_figure_supplement_2.pdf › elife_poa_e50034_Figure_7_figure_supplement_2.pdf]

Figure 8-figure supplement 2

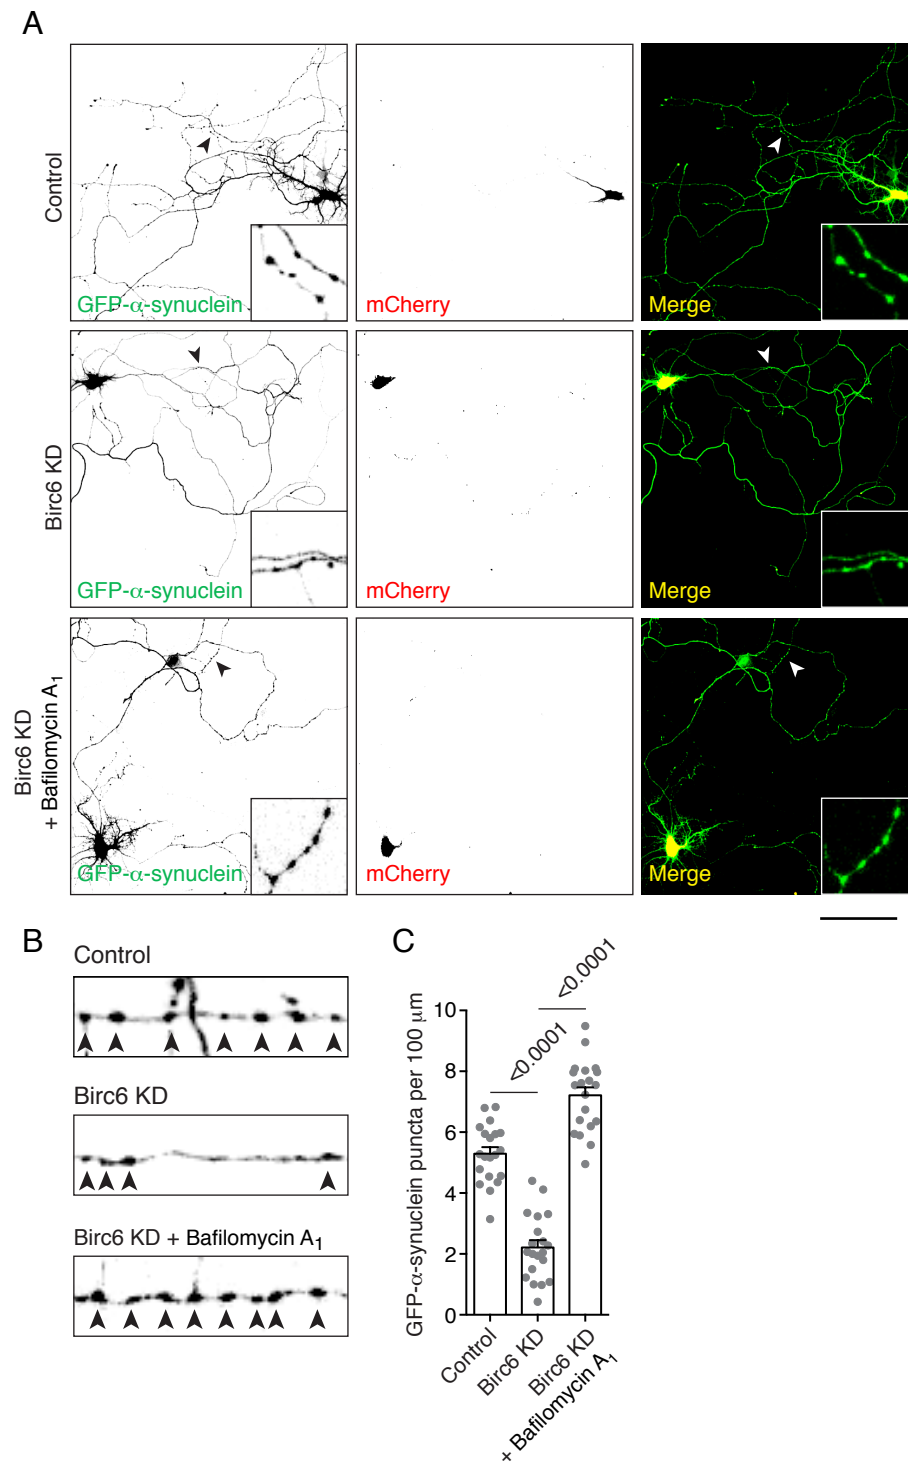

Supplement: supp [file elife_poa_e50034_Figure_8_figure_supplement_2.pdf › elife_poa_e50034_Figure_8_figure_supplement_2.pdf]
